# Supplementary material for: Simultaneous assessment of human genome and methylome data in a single experiment using limited deamination of methylated cytosine
Source: Genome Res. 2024 Jun;34(6):904–13. doi: 10.1101/gr.278294.123 (PMC11293541; doi:10.1101/gr.278294.123)
Supplement: Supplement 4 [file Supplemental_Table_S4.xlsx]

## Sheet: Tar_NA12878_RIMSseq_Rep1
Supplemental Table S4 : CGI methylation result from RIMS-seq2 (GRCh38 coordinates).
region	total	error	Methylation
chr1-100037927-100038848	3340	0	0
chr1-100132575-100133198	3918	1	0.017007
chr1-100213211-100213542	8591	100	0.780056
chr1-100266077-100266443	3250	0	0
chr1-100539013-100540329	23002	16	0.0452994
chr1-1013950-1014471	9070	22	0.182818
chr1-1019389-1020963	6509	1	0.0150034
chr1-10326126-10326332	3523	47	0.930048
chr1-103525471-103526291	3450	0	0
chr1-10398492-10399940	7971	3	0.0267062
chr1-1040117-1044925	51829	448	0.649329
chr1-10430144-10431015	5122	1	0.0127298
chr1-1045689-1046020	6114	52	0.628118
chr1-1046773-1047131	3708	44	0.883637
chr1-10472121-10472743	4534	0	0
chr1-10474862-10475115	3016	0	0
chr1-1047795-1048232	9452	88	0.724545
chr1-1054895-1055314	3296	26	0.554992
chr1-106080772-106081232	8033	67	0.620058
chr1-10638243-10640041	27477	295	0.796278
chr1-10647754-10648083	6409	65	0.761362
chr1-10653782-10654146	7117	69	0.729466
chr1-10654345-10654651	3053	33	0.775634
chr1-10659811-10660524	11359	128	0.809609
chr1-10665131-10665560	10431	105	0.733713
chr1-1067284-1069938	3322	38	0.77989
chr1-10693717-10695464	9122	1	0.00538942
chr1-107056584-107057788	21834	2	0.00321123
chr1-1071837-1072253	10491	76	0.535381
chr1-107480611-107480820	5265	4	0.0491031
chr1-107964630-107965419	4030	0	0
chr1-108199779-108200579	9163	1	0.00607196
chr1-1082720-1083010	3596	45	0.908406
chr1-108559917-108560590	3937	1	0.0171777
chr1-108746397-108747200	3939	1	0.0151701
chr1-108963060-108963592	4702	0	0
chr1-109090567-109091010	3850	3	0.0632062
chr1-109213843-109214476	3573	0	0
chr1-109249324-109250101	3550	0	0
chr1-109258433-109259078	18078	205	0.815007
chr1-109281692-109281904	3620	45	0.822717
chr1-109397453-109398272	12657	0	0
chr1-109426027-109426948	5062	1	0.0113579
chr1-109466341-109467165	8436	4	0.036242
chr1-109483832-109484281	4619	1	0.02187
chr1-109493924-109494321	10446	2	0.00981457
chr1-109548418-109548968	3608	1	0.019433
chr1-109655920-109656505	4618	1	0.0126492
chr1-109667960-109668334	3943	1	0.0171939
chr1-109687617-109687992	3128	1	0.0221182
chr1-109739730-109740684	8090	7	0.0700871
chr1-109984627-109985404	4140	0	0
chr1-110067644-110070681	9083	11	0.0849221
chr1-110209635-110212172	22641	26	0.0792554
chr1-110223044-110223390	8776	81	0.738624
chr1-110338321-110340178	18399	2	0.00562866
chr1-110407271-110407918	9099	3	0.0246397
chr1-11058974-11060577	9745	4	0.0277237
chr1-110673623-110675675	33776	89	0.186928
chr1-11099331-11100079	5683	0	0
chr1-111203692-111204681	5313	1	0.0104889
chr1-111346517-111346917	3165	0	0
chr1-111448683-111449580	9670	0	0
chr1-111619583-111620215	17464	3	0.00821676
chr1-111738431-111740655	5326	0	0
chr1-111755420-111756370	11267	4	0.020442
chr1-111981847-111982763	21014	209	0.73831
chr1-111988938-111991151	10220	10	0.0638435
chr1-112508192-112509679	7854	12	0.119156
chr1-112618970-112619949	8926	1	0.00590792
chr1-112674854-112675475	3081	0	0
chr1-112714264-112715438	8864	0	0
chr1-112722952-112723165	3642	18	0.35142
chr1-113072970-113073638	4645	0	0
chr1-113198852-113199123	3719	30	0.600574
chr1-113389959-113391448	12291	2	0.00799964
chr1-113811752-113812678	19599	3	0.00686722
chr1-113929344-113930277	5031	0	0
chr1-114152515-114154050	4569	3	0.0420051
chr1-114510440-114511643	17018	1	0.00203851
chr1-114780455-114780841	3829	0	0
chr1-11501310-11502099	19625	193	0.719672
chr1-115089230-115089963	3868	1	0.0153012
chr1-11529782-11529987	4863	45	0.61889
chr1-11536326-11536565	4807	46	0.761692
chr1-115837739-115839743	32383	33	0.0702536
chr1-115976526-115976916	4593	0	0
chr1-116372670-116374191	3686	0	0
chr1-11648711-11649220	6524	45	0.500124
chr1-11650403-11650731	6787	5	0.0491671
chr1-11654161-11655249	4991	4	0.056198
chr1-116570339-116571261	4379	0	0
chr1-11680343-11681660	4244	7	0.120943
chr1-116909582-116910830	5726	2	0.0222731
chr1-116944628-116945023	10709	109	0.7573
chr1-117059767-117060648	6324	2	0.021416
chr1-11762083-11762306	6142	5	0.0533618
chr1-11805406-11806509	3023	0	0
chr1-11838337-11838675	7021	78	0.851198
chr1-118987197-118988089	6642	4	0.04257
chr1-11925587-11926078	6365	2	0.0212926
chr1-11934693-11934912	4112	1	0.0165996
chr1-119622680-119624003	39775	448	0.831634
chr1-1197448-1197838	12180	100	0.600999
chr1-120068735-120069889	7696	1	0.00843649
chr1-120340913-120342284	4088	0	0
chr1-1206291-1206770	8941	2	0.0166828
chr1-12063432-12064091	5528	1	0.0112057
chr1-120724171-120724849	4290	0	0
chr1-121097208-121098110	5746	2	0.0212549
chr1-121118209-121118586	6845	3	0.0306562
chr1-1213676-1214144	6580	12	0.134514
chr1-12166820-12167655	3397	0	0
chr1-1217143-1217754	8245	98	0.849821
chr1-1218405-1219039	7092	82	0.857632
chr1-12191278-12191928	4622	50	0.769528
chr1-1231622-1233605	32695	259	0.595549
chr1-1242506-1242827	5615	38	0.509295
chr1-1246377-1247090	8179	3	0.0230912
chr1-125118140-125119694	4811	48	0.664393
chr1-1255143-1255419	5654	72	0.941702
chr1-12616979-12618636	7155	3	0.0309732
chr1-1286018-1294783	62748	558	0.669928
chr1-1296482-1298279	9448	101	0.787516
chr1-1307021-1309805	29311	79	0.205704
chr1-1312607-1313113	8686	111	0.923873
chr1-1318943-1319168	5932	65	0.792981
chr1-1324264-1325255	5322	0	0
chr1-1327286-1328040	12270	138	0.855238
chr1-1331706-1331906	3489	42	0.834348
chr1-1332056-1333606	25999	219	0.644565
chr1-1336046-1336694	9705	79	0.589017
chr1-1338107-1340460	31890	339	0.803723
chr1-1348554-1351571	6823	0	0
chr1-13513011-13514118	12331	5	0.0282444
chr1-1354328-1355746	37649	79	0.1512
chr1-13583643-13584373	8878	21	0.169085
chr1-13699987-13700705	8356	0	0
chr1-1373761-1375659	17700	110	0.454288
chr1-13748773-13749963	5302	0	0
chr1-1387265-1387544	6624	75	0.813873
chr1-1398692-1400222	9876	2	0.0119093
chr1-1406729-1407555	7412	0	0
chr1-1419780-1420620	14719	33	0.161395
chr1-1426181-1426407	4334	13	0.219809
chr1-1427517-1427953	8003	16	0.134694
chr1-1435561-1436069	3993	2	0.0315226
chr1-143736122-143736547	4203	9	0.144258
chr1-143884629-143885489	3081	3	0.0710389
chr1-143904250-143904674	4932	52	0.773556
chr1-143905323-143905942	7416	6	0.0547542
chr1-1439082-1440204	22471	230	0.760497
chr1-145214834-145216221	3095	2	0.0664381
chr1-145453912-145454666	9050	50	0.409202
chr1-145823594-145824433	3653	1	0.0189502
chr1-145845533-145845932	5907	1	0.011167
chr1-145858693-145859938	4619	0	0
chr1-145918452-145919050	5121	0	0
chr1-145927162-145927504	3507	0	0
chr1-145957607-145958063	7097	1	0.00751137
chr1-145960386-145962107	33744	7	0.012411
chr1-14598115-14599497	8948	7	0.0520982
chr1-146019305-146019601	9487	11	0.0779372
chr1-1460706-1460958	4333	25	0.422915
chr1-146228090-146229263	6542	2	0.0190626
chr1-147050657-147050993	3159	39	0.82216
chr1-1471465-1472441	3348	1	0.02032
chr1-147171892-147172922	6455	1	0.00982093
chr1-147178044-147178273	4222	12	0.213486
chr1-147242440-147243628	4210	0	0
chr1-147669721-147670796	3333	1	0.0198781
chr1-147908012-147908355	7953	72	0.698884
chr1-148146123-148146930	9336	118	0.912334
chr1-148148926-148149685	7247	80	0.783328
chr1-1481906-1482373	3817	46	0.866486
chr1-148458797-148460187	6390	1	0.00895832
chr1-1484847-1485304	3784	58	0.832275
chr1-148678843-148680005	9074	1	0.0059691
chr1-149175502-149177055	4236	9	0.0934844
chr1-14923878-14925049	10869	1	0.00477857
chr1-149390845-149391541	3311	0	0
chr1-149606800-149608359	4942	1	0.0120061
chr1-149792573-149793433	8269	2	0.0160803
chr1-149811970-149812469	5420	4	0.0547278
chr1-149813038-149813657	8431	7	0.0540429
chr1-149886220-149887920	34637	2	0.00335778
chr1-149899527-149900393	9850	77	0.587979
chr1-149927734-149928001	3159	1	0.0224346
chr1-150149506-150150888	3418	1	0.019809
chr1-150557180-150557428	4412	41	0.704234
chr1-150578853-150579877	22933	3	0.00646533
chr1-15065686-15066023	3963	36	0.703941
chr1-1509209-1509469	3949	42	0.783731
chr1-151047736-151048151	6014	3	0.0312541
chr1-151131210-151133624	35924	357	0.71852
chr1-1511499-1512825	3211	1	0.0211441
chr1-151198372-151199056	3628	1	0.0183072
chr1-151399382-151400106	6743	0	0
chr1-151511098-151511642	3201	0	0
chr1-151540186-151540723	4820	1	0.0140417
chr1-151611899-151612729	11488	1	0.00469599
chr1-151762970-151763617	8629	2	0.0129864
chr1-151837985-151839208	27689	8	0.0158412
chr1-151909288-151909931	3439	0	0
chr1-1519923-1520512	5400	57	0.768674
chr1-152107522-152112739	105295	337	0.234574
chr1-1522575-1523649	10763	123	0.850251
chr1-152515582-152515794	3457	7	0.135957
chr1-1529129-1529426	3693	39	0.755221
chr1-153260997-153261837	31919	18	0.0355456
chr1-1535225-1536210	10511	119	0.82121
chr1-153658590-153658893	6320	0	0
chr1-153678355-153679899	17342	14	0.0607995
chr1-153689728-153689963	3878	39	0.720014
chr1-153775180-153776222	27348	3	0.00336687
chr1-153941868-153942102	6632	70	0.762826
chr1-153958071-153958654	7827	4	0.0315404
chr1-1539583-1541289	10701	5	0.0296723
chr1-153990752-153991034	3175	0	0
chr1-15409555-15410732	8805	0	0
chr1-154220368-154221312	6334	1	0.00897525
chr1-154405195-154405969	3805	0	0
chr1-154501632-154503223	13105	30	0.156144
chr1-154558206-154559089	11045	0	0
chr1-154567758-154568097	3552	6	0.11339
chr1-154571343-154572237	22362	237	0.825204
chr1-154607905-154608321	4618	0	0
chr1-154772111-154772388	4820	84	1
chr1-154936487-154937455	3355	0	0
chr1-154961453-154962259	25121	1	0.000912411
chr1-154974267-154975010	5881	0	0
chr1-155050513-155051856	11598	1	0.00447821
chr1-155062450-155064102	6024	19	0.216071
chr1-155078680-155082545	5799	3	0.0334991
chr1-155084712-155085580	8910	2	0.0124574
chr1-155135532-155136135	11870	1	0.00810083
chr1-155172867-155173462	6339	2	0.0253054
chr1-155188537-155192004	13040	96	0.519207
chr1-155208757-155209168	10871	0	0
chr1-15524104-15525086	3758	1	0.015938
chr1-155250292-155250758	11785	2	0.00893903
chr1-155262022-155262521	3648	3	0.0538332
chr1-155269488-155269703	5465	76	0.906872
chr1-155277201-155277957	10404	1	0.00944326
chr1-155294528-155295745	24089	92	0.271595
chr1-155320816-155321210	10759	9	0.0573063
chr1-155322679-155325642	36905	56	0.111485
chr1-155562496-155563489	5551	1	0.0111973
chr1-155688042-155689334	16481	0	0
chr1-15584594-15585113	8506	4	0.02962
chr1-155934282-155934516	4154	0	0
chr1-155950861-155951107	5944	75	0.894683
chr1-155977888-155978699	5484	0	0
chr1-156053172-156054188	4146	0	0
chr1-156076553-156077593	25336	183	0.542552
chr1-156081449-156081933	6068	1	0.0106849
chr1-156114696-156115347	9411	1	0.00566259
chr1-156135917-156136380	7864	84	0.79004
chr1-15617327-15617861	4486	2	0.0276613
chr1-156212794-156213306	3335	0	0
chr1-156245578-156246108	11734	7	0.0404764
chr1-156282449-156282924	3267	0	0
chr1-156291409-156291634	6046	55	0.62134
chr1-156368968-156369460	3088	2	0.0421816
chr1-156420612-156421927	5826	0	0
chr1-156572308-156572710	4297	1	0.0136247
chr1-156591885-156592088	3598	2	0.036046
chr1-156623866-156625674	31823	31	0.0692633
chr1-156646762-156647154	9062	48	0.398694
chr1-156657551-156657784	3744	0	0
chr1-156676501-156677468	17083	34	0.140272
chr1-156750956-156752277	13112	2	0.0105685
chr1-156767244-156768221	8842	1	0.00665908
chr1-156813732-156814245	9580	2	0.0154863
chr1-15684084-15685007	7250	0	0
chr1-156845090-156846000	15992	56	0.255578
chr1-156848911-156849400	6362	19	0.209814
chr1-156859013-156861310	7290	6	0.0536544
chr1-156907978-156908350	8232	75	0.677206
chr1-156920452-156921014	5496	11	0.149169
chr1-156923728-156924440	7822	1	0.00667453
chr1-156927408-156928004	12291	12	0.0700569
chr1-15727122-15727480	6169	82	0.882564
chr1-15731803-15732010	3126	33	0.763196
chr1-1574103-1575367	4218	0	0
chr1-15744134-15744358	3640	31	0.634866
chr1-158177644-158178064	3358	11	0.223063
chr1-158180831-158181713	10101	6	0.0388936
chr1-15847395-15848901	10815	0	0
chr1-15934376-15934660	5554	85	0.939307
chr1-15943406-15943764	7142	81	0.807102
chr1-15944097-15945087	17598	207	0.860463
chr1-159780627-159781563	10854	6	0.0378313
chr1-159854217-159855130	12361	0	0
chr1-1598952-1600756	16524	30	0.126994
chr1-159929643-159930063	9341	88	0.696893
chr1-160031506-160032199	5685	3	0.0386729
chr1-160083932-160084948	25809	122	0.363836
chr1-160343139-160343548	5751	0	0
chr1-160419314-160419596	4884	58	0.891132
chr1-16073154-16073496	3165	1	0.0217774
chr1-161020929-161021435	4523	1	0.0148273
chr1-161038588-161039040	10574	10	0.0620671
chr1-161079557-161079947	9539	89	0.705622
chr1-161098273-161099011	13222	15	0.0801073
chr1-161117933-161118322	8140	1	0.00649346
chr1-161166212-161166896	4756	0	0
chr1-161177272-161177661	4692	0	0
chr1-161202020-161202466	3028	0	0
chr1-161258688-161259238	6140	17	0.187785
chr1-16137882-16138126	4962	42	0.616306
chr1-16148617-16148829	4709	52	0.758629
chr1-1615074-1616635	22538	15	0.0442464
chr1-161524235-161525566	11059	23	0.158965
chr1-16154990-16155965	3821	2	0.0339009
chr1-161605745-161607118	10813	114	0.784279
chr1-161725848-161727508	22508	3	0.0067199
chr1-161749625-161750286	6889	0	0
chr1-161983827-161984249	5598	55	0.768621
chr1-162023233-162024341	3098	23	0.55285
chr1-16206423-16208085	20095	66	0.231836
chr1-162069429-162070262	3673	0	0
chr1-1623208-1623979	17076	171	0.744458
chr1-162367087-162367531	8110	70	0.624482
chr1-162497810-162498237	7215	1	0.00732596
chr1-1625401-1625675	5251	47	0.689597
chr1-1626670-1634630	60589	335	0.412896
chr1-16367127-16367775	4628	0	0
chr1-16440504-16441308	4850	0	0
chr1-165354955-165357091	3637	5	0.0978736
chr1-165698308-165698580	5004	0	0
chr1-165768596-165769112	4714	0	0
chr1-165827417-165828446	7347	0	0
chr1-166165022-166167211	7496	8	0.0752853
chr1-16646991-16648550	29427	106	0.260256
chr1-166875760-166876536	3852	0	0
chr1-166920540-166921412	17001	64	0.277299
chr1-16707274-16708233	7674	14	0.136798
chr1-167219894-167222124	3305	0	0
chr1-167553233-167553833	11169	0	0
chr1-16758917-16760479	4523	32	0.511013
chr1-167630236-167630602	4104	0	0
chr1-167721742-167722615	4455	0	0
chr1-167820159-167820409	3115	0	0
chr1-167935790-167936877	3107	0	0
chr1-168056271-168056484	5500	70	0.8262
chr1-168136079-168136920	7014	1	0.00770835
chr1-168178726-168179399	3607	1	0.0161751
chr1-168225708-168226601	3234	0	0
chr1-16888927-16889599	3131	0	0
chr1-169105529-169107173	5201	0	0
chr1-169485321-169486339	8275	2	0.0144137
chr1-16955324-16955561	5759	61	0.732908
chr1-16960796-16961189	6010	1	0.00964943
chr1-16966410-16966620	3261	31	0.645952
chr1-17005391-17005598	3693	35	0.720718
chr1-17011335-17012087	3282	0	0
chr1-17053962-17054227	3844	0	0
chr1-170664162-170665037	5888	11	0.131383
chr1-17119157-17119593	3718	2	0.0343136
chr1-171670808-171671084	3550	30	0.628499
chr1-171784277-171784489	3387	52	0.985587
chr1-171841328-171842185	6438	5	0.06012
chr1-172532771-172533405	9276	0	0
chr1-173476840-173477966	4048	4	0.0645233
chr1-17437577-17439981	8502	2	0.0129803
chr1-174999354-175000488	4727	1	0.0138278
chr1-175079415-175079738	8854	82	0.711838
chr1-1753935-1754532	10340	124	0.88942
chr1-176206576-176207675	10637	2	0.00987044
chr1-17622958-17623175	3338	28	0.60771
chr1-17696987-17697297	8405	70	0.600107
chr1-177164257-177164710	6142	4	0.0440064
chr1-178094119-178094711	6814	4	0.0419388
chr1-17825884-17826347	8014	34	0.316431
chr1-178486665-178487151	3661	9	0.177412
chr1-179081941-179082813	10110	1	0.00583313
chr1-179229029-179230065	8740	0	0
chr1-179575586-179576172	10208	37	0.257724
chr1-179586230-179586915	4222	21	0.354897
chr1-179882348-179883236	12743	3	0.0138622
chr1-180154421-180155449	9163	0	0
chr1-180228985-180235840	4128	3	0.0660956
chr1-180631892-180632680	5263	1	0.0108192
chr1-180935181-180935575	11582	132	0.825089
chr1-181022584-181023013	3352	0	0
chr1-18107612-18108319	5081	12	0.178279
chr1-181088368-181090040	25550	4	0.00703915
chr1-181413155-181413712	12055	100	0.594465
chr1-181483571-181483937	6385	11	0.116291
chr1-181798358-181798757	7042	52	0.535501
chr1-182056470-182057376	21898	107	0.354306
chr1-182390563-182392428	11063	1	0.00453576
chr1-182952685-182953509	14024	63	0.318734
chr1-183022670-183024235	10444	2	0.0132382
chr1-183472491-183473120	5315	1	0.0106144
chr1-183635149-183636198	4651	1	0.0149452
chr1-18365381-18365587	4732	22	0.377568
chr1-18376802-18377002	4452	32	0.524913
chr1-184036226-184037632	10385	1	0.00500026
chr1-184051648-184051920	4943	0	0
chr1-184754119-184755304	6897	0	0
chr1-18482380-18483173	20712	233	0.836512
chr1-184973731-184974645	5036	1	0.0127628
chr1-18630402-18633335	4689	1	0.0123903
chr1-18854452-18854975	9792	89	0.680977
chr1-18877381-18877740	6995	78	0.77656
chr1-18883133-18883420	4625	53	0.819845
chr1-1889967-1891833	7227	1	0.0082063
chr1-18902335-18903140	5107	1	0.0127219
chr1-18955455-18957389	18307	2	0.00568065
chr1-1918660-1919952	11621	2	0.00932532
chr1-19209658-19210552	7967	2	0.0203942
chr1-19251391-19252214	10056	1	0.00550295
chr1-19273756-19274448	9948	66	0.50291
chr1-19288505-19289166	8375	51	0.444437
chr1-193059092-193060141	11614	1	0.00398511
chr1-193105045-193105434	4189	1	0.0243661
chr1-19311714-19312815	10591	0	0
chr1-19485210-19486150	3748	1	0.0185167
chr1-19596848-19597508	4232	1	0.0161149
chr1-19664654-19666295	13883	33	0.171781
chr1-19679018-19679372	8735	84	0.679837
chr1-197146149-197146861	8026	0	0
chr1-197774802-197775658	3604	1	0.0166434
chr1-197902459-197903169	10012	0	0
chr1-197917959-197918661	3539	4	0.0745975
chr1-197921349-197921694	5289	22	0.306605
chr1-19882315-19882969	14950	3	0.0107885
chr1-200039265-200039919	4817	1	0.0139529
chr1-200147569-200148076	8320	104	0.83576
chr1-200873069-200874260	24737	111	0.337563
chr1-200911466-200912142	9793	97	0.719273
chr1-201000496-201000810	4222	38	0.626493
chr1-201023155-201023871	7006	0	0
chr1-201114331-201115439	16330	53	0.237804
chr1-201226903-201227139	4438	27	0.448481
chr1-201283325-201284520	4923	23	0.378087
chr1-201399134-201399904	7963	15	0.139914
chr1-201468392-201469520	9198	15	0.112114
chr1-201506758-201507388	12889	1	0.00374762
chr1-201647914-201650660	19554	131	0.480862
chr1-201739660-201740301	3371	1	0.0175376
chr1-201829086-201829570	3727	0	0
chr1-201888787-201889178	4801	6	0.0835874
chr1-201955209-201955925	3375	0	0
chr1-201982458-201983451	14972	3	0.0129466
chr1-202144024-202145015	5265	0	0
chr1-202193881-202194262	5521	2	0.0255353
chr1-202214066-202214535	4841	14	0.217895
chr1-202348530-202349068	8156	1	0.00672306
chr1-2025608-2025947	3362	17	0.361339
chr1-2027976-2028428	5270	40	0.565143
chr1-202806876-202808599	7827	1	0.008031
chr1-202888556-202889266	4877	1	0.0136755
chr1-202966918-202967499	3372	0	0
chr1-2029969-2030411	8280	75	0.675211
chr1-203007201-203007900	8299	0	0
chr1-203075595-203076262	5747	6	0.0716138
chr1-203305170-203306210	5438	0	0
chr1-20343074-20343525	8271	16	0.132331
chr1-204151271-204152433	9607	12	0.0862477
chr1-204190471-204190705	5706	0	0
chr1-204257417-204257780	7395	56	0.535661
chr1-204411186-204412031	5574	0	0
chr1-20483970-20487018	6857	5	0.0569804
chr1-2049813-2051773	4027	3	0.0563512
chr1-205069657-205070025	5227	31	0.43272
chr1-20507924-20508390	3053	1	0.02317
chr1-205210836-205211782	9827	2	0.0112078
chr1-205241568-205242036	8998	74	0.608871
chr1-205268985-205269418	9096	85	0.696327
chr1-205321105-205321907	10041	5	0.0308632
chr1-205343366-205344448	6049	12	0.135424
chr1-20552402-20554002	25015	15	0.0394179
chr1-205528876-205529462	8950	29	0.223356
chr1-205568624-205569438	5071	1	0.011966
chr1-205662850-205663126	5673	58	0.741066
chr1-205849771-205850063	3178	33	0.713629
chr1-20633372-20634058	12712	5	0.0237228
chr1-206506904-206508111	12406	4	0.0190393
chr1-20661024-20661745	5698	0	0
chr1-206635179-206635842	4363	0	0
chr1-206684882-206686306	5877	2	0.0203905
chr1-206909349-206909857	9373	9	0.0639117
chr1-20704516-20704876	8090	95	0.846379
chr1-207050745-207051105	6972	1	0.00754295
chr1-20717340-20718278	8845	19	0.157693
chr1-207454187-207454935	5790	1	0.00986848
chr1-207496293-207496670	4062	0	0
chr1-207644967-207645607	6157	8	0.0988022
chr1-207669461-207669914	3527	23	0.470519
chr1-207751827-207752619	5778	0	0
chr1-207910754-207911168	3583	1	0.017885
chr1-207963322-207963838	8749	0	0
chr1-209625805-209626009	3490	32	0.653051
chr1-209675099-209676083	6429	4	0.0398531
chr1-209937835-209938709	4777	6	0.0891994
chr1-210328744-210329449	11934	3	0.0160912
chr1-210683718-210683920	5004	52	0.806239
chr1-211133326-211134333	3252	5	0.10558
chr1-211207065-211207441	4627	58	0.851118
chr1-211258764-211260792	8549	0	0
chr1-211326590-211327294	4515	0	0
chr1-211416336-211416879	7255	67	0.651231
chr1-211478965-211479412	8409	17	0.140779
chr1-211577780-211579835	19770	4	0.0121089
chr1-21176623-21177343	3616	0	0
chr1-21225082-21225438	4835	42	0.658962
chr1-212284626-212286352	6161	0	0
chr1-212414250-212414942	4416	0	0
chr1-212432764-212433502	4611	0	0
chr1-212699119-212700706	3824	0	0
chr1-212791525-212792005	5731	0	0
chr1-212858018-212858777	11487	1	0.00405892
chr1-21289888-21290608	12066	1	0.00424508
chr1-212950306-212951750	21681	20	0.0707975
chr1-213015178-213015482	4069	2	0.031173
chr1-213051270-213051525	3542	1	0.0165437
chr1-21344868-21345826	5254	1	0.0121631
chr1-21427996-21429502	10663	53	0.368498
chr1-214280754-214281704	8001	0	0
chr1-21436578-21436923	4838	11	0.171264
chr1-214383823-214384099	5985	66	0.764691
chr1-214605566-214606366	9676	114	0.87742
chr1-214608320-214609213	11483	125	0.764697
chr1-214870435-214870660	4505	53	0.827442
chr1-215567165-215567923	5699	1	0.0173479
chr1-21603687-21603887	4998	42	0.645285
chr1-21782637-21783768	8320	0	0
chr1-21814407-21814914	13460	53	0.284593
chr1-21828808-21829072	4733	59	0.889314
chr1-2184994-2185362	4813	44	0.688282
chr1-21864857-21865099	5997	63	0.762337
chr1-21884500-21884825	5999	61	0.740109
chr1-21887410-21887626	4631	42	0.676156
chr1-219173768-219174230	3782	0	0
chr1-21936854-21937784	4040	0	0
chr1-219927791-219928805	17288	10	0.0405186
chr1-220046075-220046719	4233	0	0
chr1-220093973-220094592	7565	0	0
chr1-220528120-220529006	4781	1	0.0209869
chr1-220690166-220690907	12771	4	0.0204479
chr1-220786675-220787261	8999	6	0.043026
chr1-220878625-220880331	13990	1	0.00338843
chr1-220882151-220882458	3245	44	0.930458
chr1-220884122-220884870	9546	105	0.770357
chr1-22120028-22120450	7014	78	0.802886
chr1-22142420-22143759	3852	2	0.0329876
chr1-222618058-222618741	4349	1	0.0133912
chr1-2226774-2229734	19146	14	0.0491702
chr1-223363501-223365286	3877	0	0
chr1-223393301-223393926	12744	33	0.183687
chr1-223394340-223394644	6545	65	0.723447
chr1-223712289-223713121	8803	1	0.0072779
chr1-223748641-223749342	5229	6	0.0878885
chr1-223845384-223846561	6322	0	0
chr1-224114207-224114770	5338	0	0
chr1-224182884-224184053	6816	3	0.0282502
chr1-224356822-224357522	4490	0	0
chr1-224615936-224617612	7250	6	0.0563051
chr1-224929519-224930079	10100	4	0.0265045
chr1-225652569-225654093	21487	3	0.00638931
chr1-22576310-22576920	12324	126	0.75504
chr1-225887451-225887980	8229	58	0.500389
chr1-225923943-225924852	5848	1	0.0114083
chr1-22593281-22593714	5591	29	0.357989
chr1-225939413-225939995	9544	66	0.522746
chr1-225999103-225999635	4416	1	0.013328
chr1-22600653-22601049	7277	58	0.590246
chr1-226186335-226187059	10455	2	0.0106546
chr1-226223307-226224179	12532	1	0.00381989
chr1-226308661-226309800	18020	3	0.010305
chr1-226407633-226408238	4491	0	0
chr1-22647558-22647810	3929	35	0.701438
chr1-226548680-226549711	8141	1	0.0118973
chr1-226736860-226738852	14858	26	0.119952
chr1-226976039-226976536	9465	90	0.661382
chr1-22710331-22711869	3422	0	0
chr1-227734943-227735730	14018	3	0.0146206
chr1-227786728-227787126	5207	34	0.498714
chr1-227787595-227788869	16895	5	0.0169991
chr1-227816127-227816382	3424	23	0.54109
chr1-22784412-22785074	10031	108	0.800081
chr1-227925250-227925514	5346	47	0.642496
chr1-227946722-227948581	3040	1	0.0204721
chr1-228006396-228008811	4619	5	0.0796581
chr1-228058931-228059496	14301	50	0.264566
chr1-228101969-228103483	28418	10	0.0224663
chr1-228139808-228140859	6029	0	0
chr1-228157677-228158999	31548	308	0.72713
chr1-228165408-228166285	10244	0	0
chr1-228173917-228174990	6572	80	0.876037
chr1-228211771-228214336	45206	363	0.600353
chr1-228215532-228215827	4924	47	0.709676
chr1-228216448-228216696	5008	50	0.724672
chr1-228217017-228217312	5204	52	0.726371
chr1-228274185-228274438	5437	51	0.703044
chr1-228275549-228276787	15244	23	0.1153
chr1-228280264-228280796	10207	100	0.732186
chr1-228286135-228286342	3959	27	0.501556
chr1-228315856-228317061	15020	150	0.739161
chr1-228321853-228322062	4228	39	0.669965
chr1-228360377-228360629	6175	30	0.369604
chr1-228378249-228379420	10845	27	0.178763
chr1-228394728-228395193	9975	112	0.814099
chr1-228406111-228407012	15195	1	0.00277736
chr1-228424880-228425402	14686	172	0.856129
chr1-228457407-228458733	27073	6	0.0134846
chr1-228463747-228464828	9430	6	0.0437364
chr1-228486646-228487914	8851	0	0
chr1-228646196-228648421	8519	11	0.0943489
chr1-228735064-228736550	8851	11	0.0866708
chr1-229270900-229271382	4230	0	0
chr1-229342163-229343188	8127	1	0.00651463
chr1-229431460-229434937	33823	111	0.234993
chr1-229507967-229508546	6168	0	0
chr1-22953061-22954076	22298	108	0.360397
chr1-229558026-229559327	12176	1	0.00363128
chr1-229594595-229594870	4417	54	0.828776
chr1-230066748-230068462	5764	1	0.00996545
chr1-23019322-23020184	11934	2	0.00824043
chr1-230332759-230333104	3119	24	0.554271
chr1-230356971-230357199	4710	39	0.663311
chr1-2303870-2304228	6704	61	0.695854
chr1-230425358-230426956	10743	2	0.0151147
chr1-2305004-2307630	14008	162	0.823065
chr1-230642332-230642847	3882	0	0
chr1-230867886-230868909	11376	3	0.0159877
chr1-230978126-230979127	9538	0	0
chr1-231039317-231041263	10236	1	0.0051216
chr1-231162067-231163651	22574	56	0.176745
chr1-231241051-231241497	5082	0	0
chr1-231337520-231338636	12616	2	0.00880029
chr1-231420936-231422701	19363	1	0.00229672
chr1-231626713-231627369	3448	1	0.0190582
chr1-232805309-232805961	18911	2	0.00774348
chr1-232950446-232950849	3686	2	0.035036
chr1-232986182-232986390	4357	53	0.846202
chr1-233295404-233295794	5513	0	0
chr1-233327252-233328765	22047	4	0.0111865
chr1-233613699-233614804	8839	2	0.0175623
chr1-233904708-233905711	9718	32	0.234945
chr1-234214139-234214725	3735	1	0.0157534
chr1-234231390-234231750	8356	74	0.692894
chr1-23424304-23425170	4654	0	0
chr1-234356739-234356967	3845	19	0.377662
chr1-23436662-23437478	11975	75	0.448782
chr1-234373238-234373755	8365	1	0.00758297
chr1-234478191-234479226	26000	4	0.00732579
chr1-234608531-234611278	26277	3	0.00584931
chr1-23483485-23484862	7665	0	0
chr1-235128426-235129072	4007	1	0.016434
chr1-235160950-235161402	6133	0	0
chr1-23530542-23531597	6357	1	0.00993523
chr1-235503790-235505319	4256	0	0
chr1-23559192-23559721	7086	0	0
chr1-235993574-235993971	9853	119	0.887678
chr1-236064383-236065517	7003	7	0.0691732
chr1-236142010-236143374	11297	0	0
chr1-236281304-236282400	4110	1	0.0246462
chr1-236395160-236395850	5637	4	0.0453447
chr1-236686173-236687023	6839	23	0.25937
chr1-236795015-236795902	12074	1	0.00430207
chr1-237041827-237043344	5355	4	0.0550128
chr1-23743206-23744125	6628	0	0
chr1-23778013-23778773	6266	3	0.0376073
chr1-237783888-237784148	3927	34	0.668983
chr1-2384915-2385310	5249	51	0.733999
chr1-23867765-23868500	13147	1	0.00371369
chr1-23902626-23903047	8572	47	0.432836
chr1-2391043-2392325	6604	0	0
chr1-239386956-239388039	4583	3	0.0434769
chr1-23979874-23980527	4709	1	0.0142687
chr1-240091660-240093763	39080	51	0.0876035
chr1-2402112-2402733	4099	63	0.999849
chr1-240492875-240493420	9108	98	0.793648
chr1-2408438-2408807	6472	85	0.939397
chr1-2411947-2413278	7457	1	0.00796307
chr1-241519174-241519812	5129	0	0
chr1-241639882-241640159	4094	1	0.0162133
chr1-24187051-24187987	3381	0	0
chr1-242057448-242057698	3069	28	0.656683
chr1-242523615-242525380	6735	6	0.0683784
chr1-244054973-244055236	6412	92	0.949489
chr1-244451151-244452299	10535	1	0.00588731
chr1-244461200-244461618	5735	0	0
chr1-244652898-244653778	4291	2	0.0334192
chr1-244730140-244731064	8016	3	0.0235281
chr1-244834722-244835840	3819	1	0.0156089
chr1-244862883-244864718	20322	2	0.00369721
chr1-244970000-244971409	9337	1	0.0104941
chr1-245153246-245156945	17303	6	0.0205853
chr1-24535213-24535430	3193	0	0
chr1-245685238-245685801	11090	113	0.758122
chr1-245687876-245689212	35841	281	0.581907
chr1-24642537-24643705	11226	0	0
chr1-246506847-246507466	5701	2	0.0274188
chr1-246565906-246566974	4471	1	0.0134728
chr1-246723963-246724726	5886	1	0.0111058
chr1-246931184-246932365	10054	0	0
chr1-247007567-247008132	3350	3	0.0611036
chr1-247078278-247078899	4201	0	0
chr1-247103878-247104582	7040	1	0.014269
chr1-247111284-247112455	20792	22	0.0702181
chr1-247300547-247301408	12360	181	0.951337
chr1-247330948-247332538	21879	5	0.0121732
chr1-24744862-24746095	6641	1	0.00834521
chr1-247451394-247451642	4229	47	0.844884
chr1-2478354-2478610	3656	24	0.478985
chr1-247857029-247857950	14154	12	0.0580797
chr1-2479687-2479965	6287	54	0.634755
chr1-248811897-248812318	12846	145	0.788939
chr1-248847365-248848597	40683	450	0.823204
chr1-248858213-248859220	14509	0	0
chr1-24902006-24902641	9514	76	0.572465
chr1-24929037-24932514	13157	1	0.00364865
chr1-2502148-2502626	12860	96	0.531063
chr1-2504116-2504389	8179	51	0.451143
chr1-2508688-2509039	6038	71	0.833302
chr1-2513917-2514209	3717	43	0.859485
chr1-2518484-2518767	3112	27	0.65159
chr1-2519779-2520112	5488	69	0.913744
chr1-25232073-25232687	5885	3	0.0321361
chr1-25246476-25248030	19271	2	0.00604161
chr1-2525803-2526820	5414	1	0.0107457
chr1-2529322-2530571	21517	2	0.00464254
chr1-25430075-25431624	5799	0	0
chr1-25543403-25544551	5627	1	0.0110653
chr1-25617484-25618281	14636	26	0.121084
chr1-25858982-25859865	4413	0	0
chr1-2585959-2587453	18654	0	0
chr1-26035103-26036217	5649	1	0.00999687
chr1-26045791-26046822	3858	5	0.089068
chr1-2606233-2606447	3054	27	0.642499
chr1-26110829-26112426	9991	0	0
chr1-26161317-26162115	19718	35	0.132364
chr1-26164032-26164557	5958	2	0.0217105
chr1-26169689-26170333	9106	0	0
chr1-26279872-26280422	4930	0	0
chr1-26336048-26336975	10662	2	0.0142677
chr1-26345955-26346159	4819	40	0.600149
chr1-26411092-26411657	7248	5	0.0488913
chr1-26471876-26473351	4787	0	0
chr1-26529581-26530193	5502	0	0
chr1-26695343-26697530	28946	2	0.00265102
chr1-26826740-26827183	8231	0	0
chr1-26863422-26863637	5075	59	0.82693
chr1-26889671-26890554	11426	4	0.0243495
chr1-26900002-26900518	6824	1	0.00962605
chr1-26921558-26922128	5327	0	0
chr1-26993637-26994655	16035	3	0.00955952
chr1-27006103-27006491	9997	103	0.760309
chr1-27012389-27012950	8604	14	0.112651
chr1-27201394-27201594	3982	56	0.928334
chr1-27321963-27322515	7096	0	0
chr1-27349429-27351525	27413	237	0.64128
chr1-27356787-27357099	3001	19	0.446022
chr1-27360534-27361252	12336	26	0.157346
chr1-27365922-27366752	8020	0	0
chr1-27383111-27383341	3130	17	0.392647
chr1-27547907-27548127	4745	50	0.741861
chr1-27549882-27551036	20835	224	0.787285
chr1-27615355-27615813	7230	75	0.756796
chr1-27668217-27668520	6860	91	0.916583
chr1-27725635-27726491	3972	1	0.0149105
chr1-27872521-27872746	4408	1	0.0134526
chr1-2789461-2790396	23744	90	0.279832
chr1-27914074-27915024	14246	2	0.00740173
chr1-27958510-27958793	4601	53	0.826368
chr1-27959509-27960327	7359	0	0
chr1-2800177-2800668	13525	101	0.526721
chr1-28232635-28233086	3274	0	0
chr1-28236000-28236465	5826	0	0
chr1-28259321-28260622	6737	0	0
chr1-28552891-28553192	5477	0	0
chr1-28592480-28592942	6456	5	0.061281
chr1-28736555-28737803	7508	0	0
chr1-28811990-28812836	9498	11	0.0803748
chr1-28862796-28863440	16210	171	0.764953
chr1-29121188-29125335	21732	31	0.099696
chr1-29181465-29182174	6570	2	0.0234173
chr1-29230709-29231115	5248	0	0
chr1-29236234-29238795	3437	0	0
chr1-29259386-29260086	9011	4	0.0342073
chr1-29260576-29260900	6055	11	0.134623
chr1-3022070-3022479	7614	61	0.594727
chr1-3067362-3071398	4259	0	0
chr1-30718126-30719113	8361	1	0.00734886
chr1-30721430-30721740	4421	59	0.937336
chr1-30907998-30909119	3496	1	0.0170898
chr1-31065566-31066091	4057	1	0.014448
chr1-31181576-31181986	5796	0	0
chr1-31239232-31239965	5286	1	0.0116127
chr1-31296400-31297131	4198	1	0.015692
chr1-31412948-31414163	8906	4	0.030863
chr1-31586871-31587170	8426	97	0.838749
chr1-31644610-31645360	5173	0	0
chr1-31742886-31743103	4400	31	0.51988
chr1-3185977-3186788	7038	61	0.648639
chr1-32013502-32014982	11097	0	0
chr1-32072605-32073451	5319	1	0.0126607
chr1-32204969-32206284	15247	40	0.194051
chr1-32221921-32222439	7440	4	0.0334046
chr1-32275110-32275943	9557	68	0.524355
chr1-32335259-32336628	5125	0	0
chr1-32361344-32362416	17185	58	0.241607
chr1-32394170-32394747	4095	0	0
chr1-32650943-32651762	5849	0	0
chr1-32702419-32703264	3886	2	0.0324016
chr1-32741534-32742273	5236	1	0.0121421
chr1-32753827-32754379	3834	1	0.0177506
chr1-32817075-32818305	3555	1	0.0191772
chr1-32892869-32893848	6784	4	0.0483834
chr1-32901192-32901721	4142	4	0.0669331
chr1-32963931-32965015	14719	2	0.00740691
chr1-33147376-33147720	5684	54	0.716394
chr1-33159659-33159926	6431	91	0.922858
chr1-33180726-33182272	14322	5	0.0234478
chr1-33255848-33257064	5131	0	0
chr1-33276174-33276780	7287	78	0.797235
chr1-33306546-33307174	13946	79	0.410003
chr1-33625006-33625254	4123	31	0.536453
chr1-3404706-3405746	8036	63	0.582039
chr1-3411428-3412860	33446	262	0.585595
chr1-34163183-34165375	7315	6	0.0541614
chr1-3425975-3426242	3154	22	0.512977
chr1-34761428-34761675	7086	56	0.638021
chr1-3478138-3478627	4529	46	0.691644
chr1-34784818-34785135	7240	59	0.654974
chr1-34865684-34866808	10069	1	0.00552415
chr1-34868704-34868905	5704	46	0.597339
chr1-34885431-34886253	13453	11	0.0550001
chr1-34985049-34985436	6208	0	0
chr1-3509013-3509233	4214	32	0.565945
chr1-3509798-3510006	3269	30	0.657096
chr1-3510792-3511119	3057	28	0.662243
chr1-35191867-35192723	13167	0	0
chr1-35192873-35193210	5040	0	0
chr1-35268623-35269254	5813	0	0
chr1-3530886-3531495	5349	1	0.0115338
chr1-35573249-35574450	18303	138	0.543373
chr1-35769324-35770199	3494	1	0.0199068
chr1-35807899-35808860	5578	1	0.0120663
chr1-35930649-35931661	4058	2	0.0313587
chr1-36088725-36089354	6978	0	0
chr1-3611056-3611514	4481	5	0.0781416
chr1-36149255-36149861	4205	0	0
chr1-36155851-36156709	6836	1	0.00784752
chr1-36176156-36176860	15611	173	0.815027
chr1-36178355-36179042	16898	184	0.785595
chr1-3624204-3625677	16616	2	0.00584276
chr1-36306230-36307408	16427	1	0.00245692
chr1-36320900-36323801	28077	144	0.384788
chr1-36341762-36341983	3369	42	0.849652
chr1-36463814-36464530	6655	1	0.00930064
chr1-3649781-3653072	4151	0	0
chr1-3690533-3690989	3110	32	0.748071
chr1-37032777-37035023	6680	6	0.0592028
chr1-3732731-3733110	7843	80	0.697084
chr1-37514312-37514964	4405	1	0.014833
chr1-37554006-37554222	7875	1	0.0063636
chr1-37556852-37557118	3178	22	0.517351
chr1-37691624-37692914	3844	0	0
chr1-37752519-37753223	11201	11	0.0671805
chr1-37753622-37754340	4069	4	0.0652201
chr1-37761408-37762069	15196	115	0.563765
chr1-37764167-37765216	3647	5	0.0901132
chr1-37793424-37794755	16099	8	0.0320977
chr1-37807737-37808730	19396	1	0.00157687
chr1-3786901-3787344	8680	95	0.826406
chr1-37931565-37932049	14309	1	0.0034279
chr1-3795835-3796668	14836	2	0.00779932
chr1-37989561-37990097	3929	1	0.0248779
chr1-38044431-38047970	61150	25	0.0258216
chr1-38708708-38709268	5062	62	0.896952
chr1-38859144-38860049	12421	1	0.00425743
chr1-38872808-38873677	8680	0	0
chr1-38990984-38991599	5773	1	0.0109565
chr1-3899793-3901520	3982	0	0
chr1-39104994-39106187	3790	0	0
chr1-39490753-39492465	31141	33	0.0726889
chr1-39514694-39516096	3826	0	0
chr1-39575646-39576995	7345	0	0
chr1-39639339-39640035	5936	2	0.0202955
chr1-39671551-39672415	5880	3	0.031803
chr1-39683760-39684341	6428	23	0.274569
chr1-39738641-39739067	4540	0	0
chr1-39770096-39771518	4367	1	0.0155864
chr1-39788012-39789500	20271	47	0.165108
chr1-39883270-39883616	3220	0	0
chr1-39900924-39902541	22526	6	0.014852
chr1-39954816-39955694	4596	0	0
chr1-40096995-40097456	3980	1	0.0164601
chr1-40132837-40133537	7205	59	0.61165
chr1-40161242-40161940	5846	1	0.0169407
chr1-40258125-40258338	3256	0	0
chr1-40303515-40304199	16548	171	0.740472
chr1-40315333-40315773	3462	0	0
chr1-40316549-40317473	3686	0	0
chr1-40691491-40692303	3588	1	0.0187048
chr1-40783419-40784489	9013	2	0.0118009
chr1-40818169-40818919	7638	3	0.0248844
chr1-40819182-40819477	3464	33	0.699813
chr1-40838060-40838764	6975	77	0.799714
chr1-40861278-40862613	14087	3	0.0116131
chr1-41017747-41018021	6201	68	0.82482
chr1-41361009-41362618	11926	2	0.00847104
chr1-41381582-41383465	19890	5	0.0150441
chr1-42380308-42381317	8198	2	0.0135351
chr1-42456046-42456904	12183	1	0.00386278
chr1-42681830-42683345	4537	0	0
chr1-42738445-42738652	3093	28	0.696115
chr1-42766544-42767688	24970	3	0.0076054
chr1-42887571-42887771	3666	37	0.726979
chr1-42888277-42888499	3123	26	0.638555
chr1-42957797-42959097	4505	0	0
chr1-43171833-43172381	8861	0	0
chr1-43272814-43273158	7839	63	0.601107
chr1-43304852-43305209	12287	86	0.543481
chr1-43348635-43349606	9111	73	0.57446
chr1-43358464-43359388	5137	0	0
chr1-43389705-43390250	6407	0	0
chr1-43453590-43454143	8228	2	0.0159813
chr1-43530759-43531829	6865	1	0.0074607
chr1-43591085-43591508	13141	132	0.751606
chr1-43597799-43598086	8191	91	0.818856
chr1-43605222-43605471	4548	34	0.55322
chr1-43936086-43936751	17881	22	0.0831663
chr1-43969738-43970442	3399	0	0
chr1-43974471-43975584	12456	0	0
chr1-43991479-43992100	14511	2	0.00998672
chr1-44103320-44103727	5876	39	0.50016
chr1-44631610-44632377	6077	0	0
chr1-44654566-44655051	8156	96	0.84808
chr1-44674099-44674912	4391	0	0
chr1-44724034-44724886	20446	223	0.807556
chr1-44775342-44776228	6666	0	0
chr1-44784189-44784680	11994	1	0.00458061
chr1-44786291-44786620	4954	2	0.0252074
chr1-44799863-44801111	13938	15	0.0733675
chr1-44806008-44806646	17752	200	0.818694
chr1-44813094-44813956	19705	104	0.381984
chr1-45010554-45011350	13539	2	0.00666367
chr1-45205668-45206716	15574	2	0.00715261
chr1-45326748-45327629	14682	6	0.0247767
chr1-45339893-45340311	4390	0	0
chr1-45583919-45584910	3866	2	0.0329183
chr1-45622523-45623470	21078	211	0.732964
chr1-46132455-46133457	4653	0	0
chr1-46203150-46203586	4344	2	0.0290775
chr1-46301754-46303364	12656	2	0.00875757
chr1-46340668-46341164	3482	1	0.0192797
chr1-46394053-46394619	5653	14	0.170846
chr1-46532961-46533577	11841	2	0.0120218
chr1-4653930-4656495	5679	2	0.0285631
chr1-46612909-46613295	8478	121	0.946149
chr1-46668003-46668723	8826	2	0.0120526
chr1-47023555-47023961	3090	3	0.0635562
chr1-4711593-4712485	16881	131	0.555452
chr1-47225309-47226055	12466	7	0.0360165
chr1-47230833-47232525	6272	8	0.0864466
chr1-47333740-47334754	7186	3	0.0255469
chr1-47416225-47417393	27628	30	0.0757405
chr1-47437122-47439846	43508	59	0.0925381
chr1-4772292-4772493	3139	25	0.63331
chr1-47994141-47994389	4741	48	0.80271
chr1-47996460-47997929	5348	7	0.0850887
chr1-48471633-48472399	3565	0	0
chr1-48776520-48777138	5810	0	0
chr1-50047973-50048648	4802	4	0.0625248
chr1-50418557-50425799	41847	84	0.140501
chr1-50959776-50960398	3204	0	0
chr1-51236096-51236870	3267	0	0
chr1-51344656-51345015	3056	1	0.0229335
chr1-51729357-51730149	3705	0	0
chr1-51878507-51879267	3281	1	0.0203144
chr1-52032781-52033833	21053	6	0.0170402
chr1-52368468-52368856	5759	2	0.03486
chr1-52602209-52602936	4594	3	0.0422847
chr1-52632958-52633631	9831	4	0.0256466
chr1-52698017-52698508	4992	0	0
chr1-52726352-52726756	6118	0	0
chr1-52842623-52843505	5225	2	0.0254077
chr1-52920953-52921851	5764	3	0.0337672
chr1-52927209-52927973	3989	0	0
chr1-53061993-53063302	6268	3	0.0358398
chr1-53078433-53079011	9060	101	0.780156
chr1-53196638-53197143	5500	0	0
chr1-53220225-53220719	9478	1	0.00583129
chr1-53276626-53277173	16535	178	0.786992
chr1-53326016-53328156	12372	3	0.0181459
chr1-53459519-53460555	14382	139	0.692481
chr1-53737730-53739637	7694	12	0.106646
chr1-53838086-53838589	4921	2	0.0282584
chr1-54052929-54053626	3891	1	0.0171697
chr1-54200149-54200586	8624	0	0
chr1-54405181-54407327	9445	3	0.018169
chr1-54715673-54716180	3868	0	0
chr1-54781070-54781846	16973	170	0.738007
chr1-54800605-54801385	16790	29	0.130758
chr1-54805993-54806299	4670	54	0.826719
chr1-54886791-54887655	6232	2	0.019108
chr1-54980415-54981173	3674	11	0.207899
chr1-55039388-55040342	5114	3	0.0422758
chr1-55214793-55216035	8031	1	0.00650138
chr1-56578430-56579444	5373	0	0
chr1-56644991-56645564	5176	0	0
chr1-58576086-58577623	28715	80	0.201826
chr1-5877098-5877332	4218	46	0.740959
chr1-58781790-58785268	20931	7	0.0203219
chr1-59814416-59815376	3387	1	0.0201629
chr1-59926601-59926911	3401	1	0.0199167
chr1-6051550-6051776	3778	46	0.804503
chr1-6128814-6129060	4575	58	0.923335
chr1-6142059-6142299	4115	51	0.870576
chr1-6148657-6148979	4155	5	0.086782
chr1-61654203-61654421	3661	39	0.796426
chr1-61724976-61725270	6940	0	0
chr1-6179178-6180754	3892	4	0.0746448
chr1-6199119-6199823	3581	0	0
chr1-6205766-6206718	14688	12	0.0535831
chr1-6208761-6209528	15188	6	0.0265704
chr1-6235469-6236201	7241	2	0.0154745
chr1-6245089-6246403	11783	6	0.0319017
chr1-6249104-6250032	18356	32	0.120912
chr1-6253702-6254079	7626	69	0.699723
chr1-62687710-62688678	3121	0	0
chr1-6281077-6281352	3256	29	0.672298
chr1-63316724-63324800	42456	84	0.141589
chr1-63593267-63594242	6133	1	0.0101435
chr1-63773795-63775108	4149	0	0
chr1-6392960-6394125	7104	0	0
chr1-6418998-6420878	20190	31	0.111396
chr1-6424444-6425267	8079	3	0.0235412
chr1-6440109-6441070	12499	11	0.0591395
chr1-64469872-64470931	3338	0	0
chr1-6447148-6449126	21063	12	0.0362781
chr1-6451630-6452050	7172	47	0.494017
chr1-6454049-6455985	34561	56	0.11361
chr1-6460525-6461895	12295	128	0.777647
chr1-6470613-6470818	4028	33	0.593825
chr1-6471412-6471676	4496	42	0.675571
chr1-64744600-64745555	3759	0	0
chr1-6485084-6485858	4065	2	0.0355141
chr1-6497091-6497812	3072	3	0.0638989
chr1-65066588-65068282	6931	3	0.0260782
chr1-65147359-65149215	3387	1	0.0180189
chr1-65309334-65310063	4592	8	0.11698
chr1-65420174-65421021	4459	0	0
chr1-6554077-6554775	14604	2	0.00652228
chr1-6579368-6580301	3352	26	0.605656
chr1-6593338-6593614	6095	60	0.722032
chr1-6599066-6599445	5823	62	0.738438
chr1-6601717-6603784	29796	4	0.00624323
chr1-6612727-6615681	4428	2	0.0283295
chr1-6625012-6625780	3938	2	0.0409233
chr1-66930001-66930800	4254	1	0.0133143
chr1-6701236-6702071	4772	1	0.0140618
chr1-67053863-67054456	3169	1	0.0221824
chr1-67429453-67431143	6683	3	0.0349475
chr1-67685231-67686587	14116	1	0.00355864
chr1-6784254-6786306	7002	0	0
chr1-68046961-68047322	5046	27	0.416957
chr1-68496601-68497323	4613	1	0.0146721
chr1-69567285-69568812	4854	12	0.164983
chr1-69919361-69919587	3390	47	0.919741
chr1-70354051-70355036	9655	1	0.00472605
chr1-71046542-71048121	22476	53	0.178829
chr1-74198143-74198351	3404	0	0
chr1-75136314-75137124	5339	13	0.169747
chr1-75615694-75616680	3505	0	0
chr1-75724232-75725045	5074	0	0
chr1-7663341-7665115	30930	209	0.499211
chr1-76867427-76868849	9992	7	0.0462395
chr1-77281689-77282539	3235	2	0.0501884
chr1-7770992-7771786	4598	0	0
chr1-7783401-7785044	4227	54	0.87932
chr1-78045894-78046477	8030	1	0.0120761
chr1-7827139-7827416	6769	67	0.697664
chr1-79006597-79006852	4912	33	0.48047
chr1-8317725-8318275	3823	4	0.0701829
chr1-8324328-8324659	6294	46	0.573551
chr1-8325836-8326108	4851	50	0.768621
chr1-8330143-8330740	11631	87	0.562461
chr1-8335284-8335575	4268	43	0.743058
chr1-8343638-8344042	4707	37	0.58346
chr1-8358263-8358490	4684	40	0.619616
chr1-84077464-84078578	8201	1	0.00689863
chr1-84479250-84479667	4649	1	0.0144391
chr1-84505662-84506808	3962	1	0.0170519
chr1-84574143-84574661	5168	1	0.0124938
chr1-85047827-85048872	3652	0	0
chr1-85200136-85201967	37361	5	0.00607122
chr1-85259019-85259841	7622	1	0.00704516
chr1-85276183-85276852	4583	1	0.0218877
chr1-85464258-85465485	15768	4	0.0148413
chr1-85580680-85581557	9190	5	0.0388264
chr1-86552986-86553493	3636	26	0.531134
chr1-86704193-86705332	3162	0	0
chr1-86914480-86915531	3153	0	0
chr1-87331700-87332201	3908	5	0.088006
chr1-88683933-88685035	5251	2	0.0312718
chr1-88891281-88891708	3479	0	0
chr1-89994841-89995678	4352	1	0.015312
chr1-9039222-9040454	12339	145	0.870202
chr1-90716541-90718983	13523	37	0.185983
chr1-9128445-9129417	12057	4	0.0246707
chr1-92029811-92030407	4718	2	0.0261667
chr1-92080263-92080923	3543	1	0.028347
chr1-92298617-92299369	4685	1	0.0143691
chr1-923591-926252	33079	13	0.0229599
chr1-92480310-92487052	28663	201	0.518043
chr1-9264144-9264380	5156	48	0.694667
chr1-9264629-9264957	5400	69	0.917037
chr1-92831942-92832565	4256	0	0
chr1-92960956-92962197	3306	0	0
chr1-93180116-93180914	15404	0	0
chr1-93447913-93448967	6128	3	0.0302891
chr1-9356068-9356345	7530	71	0.713591
chr1-9367449-9367675	3585	37	0.741338
chr1-93908814-93909911	5627	0	0
chr1-940226-942983	22867	14	0.0431791
chr1-94237135-94237788	6057	0	0
chr1-94247351-94247961	3541	1	0.0193576
chr1-94417970-94418846	5145	1	0.0114191
chr1-94541282-94542083	4648	4	0.0632509
chr1-94820047-94820763	6258	3	0.0296532
chr1-94926282-94927560	15255	14	0.0621591
chr1-95234121-95234586	4539	0	0
chr1-9539292-9540385	4690	2	0.0354357
chr1-9588675-9589459	5192	0	0
chr1-958934-967274	76952	450	0.44534
chr1-9610560-9610810	5320	55	0.778891
chr1-96721547-96722263	5643	0	0
chr1-970917-971158	5056	21	0.318562
chr1-9715651-9715939	5842	72	0.857988
chr1-9730235-9730646	4231	42	0.715225
chr1-9731101-9731428	3866	37	0.693316
chr1-976047-979425	15085	113	0.542538
chr1-97920634-97921168	4362	0	0
chr1-9822954-9824609	3096	0	0
chr1-98661317-98662155	6224	2	0.0191413
chr1-99004377-99005028	7494	16	0.175691
chr1-99264427-99264779	5214	5	0.0648678
chr1-998008-1002030	27850	5	0.00871834
chr10-100229371-100229776	3739	0	0
chr10-100286386-100286875	5860	0	0
chr10-100346426-100347965	4404	0	0
chr10-100482224-100482802	11652	0	0
chr10-100529394-100529985	5957	0	0
chr10-100535792-100536153	5309	1	0.0105983
chr10-100735360-100735856	4229	1	0.0154515
chr10-100744157-100746389	5143	5	0.0643768
chr10-100747726-100749889	4851	5	0.0675447
chr10-100826369-100829867	9179	4	0.0337311
chr10-100912611-100913402	7257	0	0
chr10-100986777-100987744	17179	45	0.187587
chr10-100989114-100989331	3097	38	0.888005
chr10-100996950-101000041	4029	0	0
chr10-101005449-101005691	4305	50	0.789048
chr10-101006565-101006936	8932	73	0.580826
chr10-101018848-101019165	10955	29	0.184638
chr10-101030021-101030237	4606	33	0.540437
chr10-101032286-101032509	3075	0	0
chr10-101060732-101063117	12177	3	0.0134292
chr10-101131254-101132274	15330	15	0.0676501
chr10-101133904-101135302	7188	8	0.0886338
chr10-101136586-101136908	5959	13	0.163892
chr10-101222546-101230435	23003	66	0.201304
chr10-101353767-101354657	11695	1	0.00388818
chr10-101694223-101695357	9565	1	0.00671484
chr10-101775639-101776748	5259	4	0.0512255
chr10-101782955-101783533	4554	0	0
chr10-101817638-101818499	6701	1	0.00971037
chr10-101843410-101843669	4502	35	0.560564
chr10-102065138-102066021	15698	3	0.00955808
chr10-102119877-102120360	5112	3	0.0373053
chr10-102132903-102133833	5999	1	0.00951809
chr10-102151940-102152789	3405	0	0
chr10-102230457-102232072	26602	17	0.0419795
chr10-102393973-102395800	7660	2	0.0150151
chr10-102399340-102399779	11853	2	0.0121574
chr10-102410412-102411115	4106	6	0.104294
chr10-102420722-102422285	27920	6	0.0122411
chr10-102450339-102451228	14997	4	0.0191066
chr10-102503920-102504398	4945	0	0
chr10-102642065-102645211	11617	1	0.00766719
chr10-102656799-102657408	11316	124	0.835636
chr10-102713643-102714954	7579	0	0
chr10-102854244-102854569	3203	0	0
chr10-102869282-102869722	8473	17	0.143644
chr10-102917559-102919555	36149	69	0.142654
chr10-103276872-103278327	24870	41	0.120089
chr10-103350509-103351251	9769	2	0.011491
chr10-103367824-103368706	18407	4	0.0115657
chr10-103455296-103455703	7695	87	0.840924
chr10-103458210-103458530	7000	75	0.817225
chr10-103473165-103473699	9668	121	0.913218
chr10-103493435-103494671	4426	2	0.0281335
chr10-103555251-103555487	3158	2	0.0410917
chr10-103584417-103585282	19895	125	0.474042
chr10-103602028-103602431	8419	101	0.83364
chr10-103602793-103603070	5166	48	0.673832
chr10-103692581-103693472	3790	1	0.015985
chr10-103854754-103855736	3797	2	0.0337462
chr10-104121692-104122189	3810	0	0
chr10-104232142-104232490	4683	1	0.0213725
chr10-104254774-104255329	8774	0	0
chr10-104274817-104275045	3562	0	0
chr10-104315208-104315610	7443	84	0.80026
chr10-104315802-104316033	4094	45	0.806721
chr10-104639810-104643054	18278	24	0.0905289
chr10-1048398-1049654	6987	0	0
chr10-107164023-107165047	13832	25	0.122779
chr10-109923018-109923725	6463	1	0.00951386
chr10-11017480-11018794	4447	2	0.0307155
chr10-110207671-110210965	5970	1	0.0107307
chr10-110225806-110227456	4892	0	0
chr10-110497406-110498926	15572	2	0.00729725
chr10-110567315-110568430	4136	0	0
chr10-110643196-110644570	5794	0	0
chr10-111076233-111079545	42895	310	0.544809
chr10-112446847-112447562	3232	0	0
chr10-112951120-112951608	7630	2	0.0156649
chr10-113165764-113165992	3658	35	0.688467
chr10-113679249-113680437	8625	2	0.0189659
chr10-113854615-113855297	5229	2	0.0298754
chr10-114043325-114045709	41304	168	0.306835
chr10-114285996-114286353	7590	63	0.630561
chr10-114403633-114404840	6876	4	0.037542
chr10-11463224-11463767	11003	127	0.830846
chr10-114767766-114768715	4603	0	0
chr10-114938135-114938617	5381	1	0.0184891
chr10-115092503-115094335	15152	2	0.00710866
chr10-11610836-11611963	9333	0	0
chr10-116125303-116125518	4111	37	0.657318
chr10-116271068-116274718	5011	4	0.0510101
chr10-116627507-116627965	3535	7	0.142559
chr10-116741358-116743195	5349	0	0
chr10-117004718-117005635	3255	2	0.0519524
chr10-117134017-117134921	12759	17	0.0924863
chr10-117136453-117138526	8864	41	0.33561
chr10-117240925-117242019	3072	1	0.0202218
chr10-117374293-117376121	22740	0	0
chr10-11742016-11742938	6155	4	0.0558139
chr10-117541811-117545857	18173	35	0.136854
chr10-1184874-1185274	4933	23	0.347124
chr10-118594181-118596309	28108	168	0.448194
chr10-11869556-11870433	25324	228	0.663659
chr10-118754517-118755596	7377	1	0.0086835
chr10-119029278-119030869	26290	5	0.0121761
chr10-119042150-119042714	12982	159	0.860086
chr10-119080081-119080968	3830	0	0
chr10-119103899-119104892	5114	0	0
chr10-119165274-119166046	3886	0	0
chr10-119178517-119178906	4961	0	0
chr10-119207871-119208111	3384	1	0.017851
chr10-119541967-119543657	5277	0	0
chr10-119596302-119597446	16968	2	0.00734776
chr10-119651055-119652315	8458	1	0.00709964
chr10-119725552-119726619	5040	0	0
chr10-119872143-119873592	3577	0	0
chr10-119892492-119892995	3482	0	0
chr10-120456748-120457865	4052	5	0.0939321
chr10-12068702-12069300	5263	1	0.01289
chr10-120851167-120851540	3237	0	0
chr10-12129227-12130039	5779	2	0.0223551
chr10-121597103-121598771	3155	1	0.0194842
chr10-121927458-121928594	9906	1	0.00513144
chr10-12195834-12196378	3180	1	0.0221798
chr10-121974513-121975062	6946	0	0
chr10-122163336-122164027	3712	4	0.0729257
chr10-122460823-122462724	12322	15	0.0888935
chr10-122643143-122643448	4403	33	0.561281
chr10-122818611-122818927	7755	27	0.266105
chr10-122879228-122880277	4008	0	0
chr10-122953753-122954733	5184	1	0.0107642
chr10-122980277-122980776	7449	0	0
chr10-123008243-123009381	4605	0	0
chr10-123134560-123137850	32828	33	0.0684001
chr10-123147768-123151519	23549	39	0.117769
chr10-123154116-123155210	4024	1	0.0172409
chr10-12348804-12350590	5533	1	0.0113909
chr10-123666015-123667126	19143	127	0.493573
chr10-123891305-123891937	6239	10	0.117284
chr10-123991897-123992468	8963	41	0.327479
chr10-124044486-124044863	5213	59	0.851956
chr10-1242089-1242359	3319	26	0.597701
chr10-124447241-124450327	23514	8	0.020972
chr10-124461675-124462171	4737	0	0
chr10-124791524-124792241	5539	0	0
chr10-124801593-124802365	4093	0	0
chr10-124997983-124998323	4580	53	0.819131
chr10-125026535-125026807	6361	57	0.644669
chr10-125027160-125027360	3610	34	0.682061
chr10-125158656-125162758	3469	1	0.0174401
chr10-125719059-125719997	4147	0	0
chr10-125773662-125774418	14085	111	0.556718
chr10-125895681-125896969	5743	104	0.93231
chr10-126387587-126388913	6100	8	0.0886801
chr10-126504743-126504962	4017	48	0.766935
chr10-127175327-127175800	8079	57	0.524321
chr10-127736147-127739102	25151	149	0.429719
chr10-127907125-127907973	3074	1	0.0201801
chr10-129466685-129467446	5484	0	0
chr10-129840301-129840576	3092	29	0.696391
chr10-129958427-129960523	5297	3	0.0420836
chr10-129962906-129973432	15232	20	0.0898161
chr10-13001095-13001781	8113	11	0.100645
chr10-130110468-130111622	4652	2	0.0340419
chr10-131310931-131312789	10626	6	0.0359218
chr10-131900493-131901844	6507	0	0
chr10-131937896-131938130	3105	36	0.789199
chr10-131981395-131983094	7079	0	0
chr10-132117092-132117694	6739	45	0.507278
chr10-132140342-132140775	6796	41	0.436109
chr10-132185409-132187996	3380	9	0.208402
chr10-132202540-132202840	4074	29	0.52226
chr10-132227996-132228280	4127	29	0.541185
chr10-132306944-132308918	6809	0	0
chr10-132331674-132332521	3430	0	0
chr10-132395864-132397560	6543	1	0.00847221
chr10-132404765-132406111	39335	414	0.782867
chr10-132536799-132538191	4376	1	0.0154852
chr10-132783854-132789145	31504	100	0.234552
chr10-132869197-132869413	3581	32	0.655289
chr10-132879348-132879748	5892	28	0.353816
chr10-132919098-132920273	5899	52	0.647941
chr10-132922469-132922750	5012	50	0.739206
chr10-132924715-132925200	4252	39	0.719057
chr10-132942160-132943348	6621	6	0.0593928
chr10-13299378-13300223	4443	1	0.0153052
chr10-133070923-133071142	4334	20	0.352114
chr10-133087695-133089115	4158	2	0.0398891
chr10-133098473-133098979	3384	25	0.511011
chr10-133105252-133105471	4625	37	0.577043
chr10-133128422-133129497	27151	258	0.709545
chr10-133160027-133160807	4611	3	0.043525
chr10-133166799-133167555	5011	41	0.623324
chr10-133182815-133183497	3677	37	0.737598
chr10-133186017-133186327	7153	64	0.646639
chr10-133201200-133201898	9489	58	0.467282
chr10-133207115-133207428	5393	42	0.606326
chr10-133219827-133220841	3558	11	0.21465
chr10-133224582-133225002	3532	39	0.818842
chr10-133229718-133231488	32162	57	0.122129
chr10-133235294-133238573	4970	14	0.191286
chr10-133276466-133276987	3730	0	0
chr10-133285039-133285726	5601	69	0.870073
chr10-133288162-133288480	3246	41	0.831484
chr10-133308488-133309605	8640	16	0.135501
chr10-133309735-133309944	3067	45	0.999436
chr10-133325179-133326213	10452	3	0.0159669
chr10-133357142-133358450	5990	4	0.0438078
chr10-133372839-133373677	5008	0	0
chr10-133378091-133379803	5492	0	0
chr10-133389598-133389812	3394	1	0.0200417
chr10-133393964-133394569	5724	0	0
chr10-133423184-133425243	15473	40	0.178723
chr10-133457280-133457557	4434	42	0.684064
chr10-133458367-133458640	9108	74	0.60922
chr10-133459497-133460181	24322	183	0.557317
chr10-133465213-133465612	10803	57	0.388201
chr10-133527752-133529057	5183	9	0.119131
chr10-133565380-133566263	3480	30	0.62076
chr10-133568031-133570014	13202	119	0.657804
chr10-13528129-13529395	5393	2	0.0226786
chr10-1362465-1364024	29732	267	0.650756
chr10-13656563-13657540	24252	286	0.825137
chr10-14837771-14839042	8148	0	0
chr10-14878322-14879689	5341	0	0
chr10-14953682-14954432	4116	0	0
chr10-15088388-15088914	5868	0	0
chr10-15167826-15168715	5803	0	0
chr10-15213056-15213288	4784	38	0.605892
chr10-15370421-15371463	6807	1	0.00791378
chr10-15719425-15720102	7507	3	0.0278475
chr10-15860081-15860403	3047	0	0
chr10-16519606-16521720	15662	4	0.0142897
chr10-17201306-17201788	3450	0	0
chr10-17228432-17230618	15743	2	0.00848264
chr10-1736591-1737824	3620	2	0.0350859
chr10-17453409-17454722	18535	15	0.0548755
chr10-17616667-17617640	11563	2	0.0086047
chr10-18140197-18141291	6643	5	0.0500762
chr10-18659185-18659782	3073	1	0.0224949
chr10-19815523-19817176	3166	2	0.0514978
chr10-21173200-21174879	4638	1	0.0142351
chr10-21494270-21497491	10134	1	0.00948184
chr10-21516269-21517701	27427	4	0.00657479
chr10-21533922-21535481	5009	0	0
chr10-22003046-22003968	6175	1	0.0160667
chr10-22315979-22316703	3977	0	0
chr10-22345072-22345933	7333	22	0.209067
chr10-22713227-22714398	3341	0	0
chr10-23191769-23193526	21945	30	0.0971929
chr10-23438908-23440594	30532	4	0.00546775
chr10-24952182-24952852	3610	1	0.0274862
chr10-2501272-2501929	4604	45	0.709469
chr10-25174498-25176710	20032	69	0.244931
chr10-26211679-26212197	5716	12	0.163688
chr10-26215455-26218505	11749	15	0.0857938
chr10-26566978-26567353	11230	106	0.672868
chr10-26697214-26698159	3987	0	0
chr10-27100147-27100693	4631	0	0
chr10-27155205-27155565	6230	0	0
chr10-27240290-27241173	8934	0	0
chr10-27252369-27252837	6431	6	0.0631141
chr10-27413440-27414189	15074	113	0.547823
chr10-27504121-27504835	5221	1	0.0125348
chr10-27741254-27746282	12305	11	0.0667647
chr10-28532261-28534163	11946	1	0.00449868
chr10-28676776-28678337	4294	1	0.0136924
chr10-29409434-29410115	3245	2	0.0443794
chr10-3066459-3069227	38975	4	0.00378082
chr10-3103728-3104014	4191	59	0.932859
chr10-3118697-3118915	3451	51	0.877604
chr10-31318299-31321165	4362	0	0
chr10-3137983-3138386	3796	60	0.972122
chr10-3172107-3173068	6582	1	0.0093717
chr10-32055623-32056642	3809	2	0.0333005
chr10-32109909-32110168	3991	38	0.711767
chr10-32346290-32347727	5286	1	0.0127
chr10-33334193-33337269	29203	23	0.0530469
chr10-34814197-34816315	5288	3	0.0407946
chr10-35336122-35337612	6986	0	0
chr10-35607591-35608324	17225	37	0.151098
chr10-35639383-35642965	39284	60	0.109091
chr10-3781598-3781825	4176	41	0.632491
chr10-3784662-3785934	4253	0	0
chr10-38010563-38011171	4347	0	0
chr10-413753-414118	3133	43	0.965874
chr10-42638076-42638702	3904	0	0
chr10-42753076-42755464	8994	11	0.0831811
chr10-43076557-43077986	4576	4	0.0655258
chr10-43104791-43105717	9519	9	0.0660492
chr10-43229081-43230165	4584	2	0.0269743
chr10-44293364-44293672	8311	31	0.273563
chr10-44384267-44386943	5763	1	0.0108442
chr10-45373271-45374708	6833	0	0
chr10-45443179-45444231	20317	199	0.734514
chr10-45726969-45727839	6425	2	0.0234388
chr10-45971896-45972794	5564	0	0
chr10-46106178-46106858	5278	9	0.112918
chr10-46284442-46285143	20245	1	0.00163979
chr10-46911236-46911769	3892	22	0.405631
chr10-47300042-47300950	6295	8	0.083842
chr10-47309892-47310694	18879	160	0.615959
chr10-47325394-47325620	4357	29	0.502182
chr10-47349987-47350342	8034	81	0.74991
chr10-47368498-47368756	5251	27	0.368169
chr10-47384165-47384902	4021	0	0
chr10-4825934-4826605	5964	6	0.0688486
chr10-48450182-48451158	24803	229	0.674441
chr10-48479619-48479827	3538	25	0.501376
chr10-48523405-48524593	3905	1	0.0167914
chr10-48587-49361	8653	62	0.527389
chr10-49115140-49115690	3898	7	0.123818
chr10-49131846-49132133	5213	47	0.653774
chr10-49326230-49326659	10730	84	0.574833
chr10-49609556-49612310	36119	153	0.3225
chr10-49614305-49614620	4767	2	0.0261339
chr10-49679520-49679816	3639	16	0.31939
chr10-49941467-49942365	6785	1	0.00908552
chr10-50067657-50068527	6752	10	0.106622
chr10-50991197-50992005	9094	7	0.0551892
chr10-51073780-51074992	8615	4	0.0280248
chr10-52314230-52315067	8609	2	0.0231911
chr10-5498823-5499552	13101	101	0.568567
chr10-5525160-5525865	12411	118	0.729294
chr10-5641686-5641915	3538	41	0.858402
chr10-5666018-5666835	4903	0	0
chr10-5684493-5685734	6331	1	0.0087573
chr10-5812744-5814002	4575	0	0
chr10-58267248-58269481	10128	0	0
chr10-58334972-58335546	3242	0	0
chr10-58512741-58513696	8465	4	0.0308603
chr10-5888952-5890674	13789	0	0
chr10-59176068-59177289	3242	8	0.166576
chr10-5976982-5978171	9698	2	0.015209
chr10-59905899-59907036	8805	2	0.0150942
chr10-60733028-60733618	4250	0	0
chr10-60943550-60944532	9398	1	0.00682345
chr10-6144558-6145892	5858	1	0.0171412
chr10-61452738-61453251	3903	3	0.0499427
chr10-61662781-61663347	3066	6	0.144287
chr10-6201013-6204494	5745	0	0
chr10-6220685-6220908	4148	33	0.593465
chr10-62268283-62268947	4549	2	0.027683
chr10-62804676-62806058	22448	1	0.00118833
chr10-62813412-62813640	6275	80	0.906925
chr10-62814901-62818923	7717	6	0.0542964
chr10-63465111-63466127	9463	0	0
chr10-63521111-63522270	4285	2	0.0329467
chr10-65053878-65054303	6939	53	0.542005
chr10-67884412-67885420	14397	1	0.00288145
chr10-68231137-68231766	13779	7	0.0333237
chr10-68406450-68407585	6565	1	0.00997421
chr10-68471640-68472040	4475	0	0
chr10-68527204-68527639	4104	1	0.0142932
chr10-68827161-68828452	4952	0	0
chr10-688768-690282	4852	10	0.143626
chr10-68900770-68901717	3412	1	0.0199993
chr10-68956183-68956738	3306	0	0
chr10-68988680-68989578	11992	2	0.00961568
chr10-69123908-69124597	5907	2	0.021178
chr10-69180141-69180548	6356	0	0
chr10-69248517-69248722	3587	34	0.715258
chr10-69318191-69319621	4988	0	0
chr10-69408650-69409196	3083	0	0
chr10-69451361-69452024	3196	0	0
chr10-69572171-69573636	18605	16	0.0607208
chr10-69801547-69803120	6026	4	0.0610773
chr10-70145460-70146919	33549	7	0.010719
chr10-70232659-70233711	4880	0	0
chr10-70255022-70255940	19296	64	0.24123
chr10-70404301-70404817	7271	2	0.0175147
chr10-70440310-70441612	5289	4	0.061596
chr10-70600500-70600825	6333	62	0.71869
chr10-70672487-70672982	4216	3	0.0471294
chr10-71212319-71214138	4584	0	0
chr10-7171881-7172141	8887	104	0.816388
chr10-71773335-71773735	4480	0	0
chr10-71850905-71851390	3917	0	0
chr10-72007399-72008621	25900	255	0.727185
chr10-72087049-72088475	6730	3	0.027317
chr10-72273410-72274940	10741	0	0
chr10-72354058-72355034	7008	0	0
chr10-72692071-72692839	5400	0	0
chr10-73246872-73247426	9054	1	0.0107861
chr10-73252369-73252773	4853	1	0.0118642
chr10-73647656-73647948	6453	14	0.160246
chr10-7367597-7367822	3216	42	0.969648
chr10-73732736-73733664	24720	258	0.749749
chr10-73772213-73773059	25307	9	0.0234368
chr10-73781800-73782448	6574	1	0.00858426
chr10-73785507-73786151	5547	0	0
chr10-73839503-73839730	3154	40	0.769712
chr10-73874029-73875038	4310	2	0.0292745
chr10-73997727-73998469	5806	0	0
chr10-74151079-74151722	3482	2	0.0371918
chr10-74176460-74177230	4871	0	0
chr10-75043783-75044099	7737	33	0.303263
chr10-75210235-75211244	3726	0	0
chr10-75234135-75236195	28137	4	0.0101055
chr10-75395371-75409842	56781	277	0.353847
chr10-75431304-75431813	5364	1	0.0114604
chr10-7576415-7576652	3383	22	0.492656
chr10-7579756-7579987	4273	41	0.761839
chr10-7666707-7667140	4001	1	0.0148813
chr10-77636338-77638737	27093	40	0.103257
chr10-7787626-7788554	8667	1	0.011382
chr10-77925962-77927292	11451	1	0.00419415
chr10-78033737-78034194	3793	0	0
chr10-7818299-7819144	9890	1	0.00513221
chr10-79347327-79348191	8442	0	0
chr10-79386203-79386441	7388	70	0.710482
chr10-79444697-79446055	6995	1	0.00911848
chr10-79981473-79982537	6404	2	0.0210233
chr10-80078604-80079322	5108	0	0
chr10-8009105-8009378	8466	104	0.872015
chr10-80132467-80132908	3114	8	0.170469
chr10-8049412-8056366	6346	9	0.0939884
chr10-8058422-8058805	11562	120	0.77717
chr10-81874294-81875973	14613	24	0.122029
chr10-84194444-84195547	9432	17	0.124974
chr10-84237354-84237671	7124	49	0.492092
chr10-8513696-8514139	7183	69	0.69376
chr10-86363168-86367607	8485	7	0.0572596
chr10-86942559-86943565	27690	308	0.825441
chr10-86968283-86968963	3250	7	0.156082
chr10-87094001-87095741	17418	2	0.00689643
chr10-87341959-87343261	6902	0	0
chr10-87504614-87505614	16915	1	0.00228021
chr10-87659590-87660270	8843	4	0.0280753
chr10-87862016-87862839	10962	1	0.00436406
chr10-88582772-88583464	3185	0	0
chr10-88990537-88991383	6042	0	0
chr10-89414649-89415409	3896	0	0
chr10-89644481-89645291	20171	3	0.006409
chr10-90857064-90858277	18432	25	0.0970375
chr10-91409731-91410816	3495	0	0
chr10-91798214-91798942	7771	0	0
chr10-91908246-91909014	20500	3	0.00755414
chr10-91923674-91924082	3411	0	0
chr10-92239375-92240244	24907	71	0.208058
chr10-92290667-92291655	4877	0	0
chr10-92573491-92574710	4923	0	0
chr10-92688937-92690722	12024	1	0.00528797
chr10-92692444-92692671	3450	2	0.0492947
chr10-92848281-92849282	4603	0	0
chr10-93060270-93063495	18107	54	0.211884
chr10-93065790-93066563	9764	7	0.045469
chr10-93068346-93069283	9684	9	0.0636104
chr10-93073516-93075499	24732	33	0.0943006
chr10-93566473-93567351	16418	33	0.139621
chr10-93600633-93601630	10138	29	0.207262
chr10-93893885-93894424	6326	0	0
chr10-94402267-94403570	25470	2	0.00352058
chr10-94545360-94546136	4183	0	0
chr10-95290429-95291367	6657	0	0
chr10-95693722-95694256	6454	0	0
chr10-96043115-96044505	7595	0	0
chr10-96384543-96384756	3868	30	0.563707
chr10-96512451-96514182	6607	2	0.0179466
chr10-96586293-96587307	7048	0	0
chr10-96720276-96720730	4544	0	0
chr10-96750462-96750670	4341	68	0.929355
chr10-96831951-96833516	9051	1	0.00655524
chr10-97043309-97043677	3704	37	0.710102
chr10-97185306-97186482	7386	2	0.0188221
chr10-97319055-97321291	27381	6	0.0122753
chr10-97333650-97335198	25705	3	0.00455914
chr10-97401058-97401359	4087	0	0
chr10-97426022-97426537	9361	0	0
chr10-97445720-97446517	4979	1	0.0118711
chr10-97498184-97499763	9402	1	0.0103074
chr10-97570204-97570447	5492	51	0.703117
chr10-97578233-97578484	6030	36	0.437195
chr10-97633030-97633618	5436	0	0
chr10-97640507-97641225	14524	0	0
chr10-97713328-97714907	10123	0	0
chr10-97771407-97772211	11997	13	0.0755862
chr10-97849669-97850359	4279	2	0.0291714
chr10-98029858-98031391	5697	3	0.0325823
chr10-987851-988675	3038	1	0.0200009
chr10-99329547-99330898	32304	74	0.163277
chr10-99533259-99533481	3307	0	0
chr10-99534687-99537946	20250	8	0.0255846
chr10-99619952-99621688	8907	0	0
chr10-99731924-99732597	7821	0	0
chr11-1007922-1008343	4809	43	0.683652
chr11-1009404-1009649	3636	48	0.981611
chr11-1010480-1010753	3177	40	0.878148
chr11-101127300-101129043	39001	23	0.0392142
chr11-101582627-101583953	6288	18	0.209924
chr11-101914864-101915397	4129	0	0
chr11-102109902-102111599	10186	1	0.00916686
chr11-1024004-1024492	3847	48	0.856401
chr11-102451799-102453031	4101	0	0
chr11-1024747-1025359	15391	150	0.74163
chr11-1029084-1029390	5826	30	0.395675
chr11-10293733-10294386	4399	1	0.0131553
chr11-10305467-10308284	14753	9	0.0396688
chr11-1031752-1032001	6535	50	0.577718
chr11-1036421-1036827	3673	29	0.565476
chr11-104036678-104037262	7437	73	0.726765
chr11-10450454-10451187	3918	1	0.0152972
chr11-1056332-1056741	9000	83	0.648531
chr11-106077371-106078089	3546	0	0
chr11-107017598-107019477	7883	3	0.0226148
chr11-107858224-107858860	3416	0	0
chr11-107928419-107929254	9328	1	0.0064322
chr11-108008775-108009672	3359	0	0
chr11-108121278-108122004	5013	0	0
chr11-108497772-108498680	8922	2	0.012125
chr11-1085139-1085362	3467	25	0.520355
chr11-108664858-108665469	4362	1	0.0150169
chr11-109422794-109423692	10450	10	0.0636942
chr11-109423940-109424257	6172	19	0.228321
chr11-110092515-110093951	8918	0	0
chr11-1102365-1102611	3981	30	0.593542
chr11-110429851-110430610	6031	1	0.0102752
chr11-110711117-110713160	7530	4	0.0338541
chr11-111514613-111514987	3451	13	0.271895
chr11-111540208-111541474	5217	6	0.0826442
chr11-111602000-111603215	7204	0	0
chr11-111765871-111766490	3929	0	0
chr11-111878847-111879354	7562	1	0.00759309
chr11-112024853-112025723	9256	0	0
chr11-112086629-112086957	4568	0	0
chr11-112226300-112226824	5784	3	0.036943
chr11-113387722-113388099	5634	20	0.261432
chr11-113875095-113875971	4660	0	0
chr11-114400078-114400968	11071	1	0.00533123
chr11-114439280-114439864	5670	1	0.0114804
chr11-115502857-115505163	4203	4	0.0616014
chr11-1161860-1162244	7046	54	0.569928
chr11-11620575-11622272	4192	1	0.0144301
chr11-116772594-116773176	6046	0	0
chr11-116787696-116788179	7184	0	0
chr11-116790319-116790694	7948	78	0.717235
chr11-116821234-116821644	9635	75	0.600722
chr11-116835766-116836194	7307	3	0.0257874
chr11-117097823-117098796	7278	0	0
chr11-117315629-117316263	5800	0	0
chr11-117481977-117482246	4474	41	0.673076
chr11-117518472-117518756	7627	74	0.740399
chr11-117780502-117780714	5231	46	0.6626
chr11-117795920-117797426	9199	7	0.0501915
chr11-1178473-1178702	5913	51	0.678728
chr11-1178999-1179340	5283	36	0.520907
chr11-117985924-117986583	4574	0	0
chr11-1181042-1181375	5712	46	0.60619
chr11-118152638-118153479	3072	2	0.0423261
chr11-1182029-1182495	8785	83	0.693151
chr11-118401547-118401831	4145	0	0
chr11-11841726-11842471	4512	0	0
chr11-118434708-118436990	11447	0	0
chr11-118530521-118531354	9468	0	0
chr11-118572302-118572916	3871	0	0
chr11-118971670-118972223	3198	22	0.492907
chr11-118997932-118998494	5872	0	0
chr11-119018169-119019405	11015	8	0.0558153
chr11-119067483-119068104	5262	0	0
chr11-119084865-119085122	3069	0	0
chr11-119094308-119095754	16712	1	0.00224953
chr11-119107169-119108075	7733	1	0.00781163
chr11-119205932-119206844	7343	0	0
chr11-119310687-119310960	3384	36	0.699315
chr11-119316238-119317436	4749	1	0.0139241
chr11-119339581-119340948	17945	74	0.299902
chr11-119356387-119357048	4215	2	0.0377431
chr11-119363771-119364504	3822	5	0.0950425
chr11-119381421-119381854	4273	1	0.0137679
chr11-1194150-1195241	17098	194	0.817434
chr11-119664850-119665282	11387	90	0.577427
chr11-119727673-119729593	4738	1	0.012413
chr11-1200346-1200637	4995	36	0.520564
chr11-12008191-12009294	6449	13	0.151789
chr11-120137339-120138002	14055	100	0.513294
chr11-120210780-120211637	5858	2	0.0235832
chr11-120986017-120986465	7286	0	0
chr11-121127678-121128177	9162	108	0.856194
chr11-121157864-121158218	7776	78	0.740451
chr11-121451830-121452593	8137	0	0
chr11-122655571-122656771	6055	0	0
chr11-1226601-1226910	6740	65	0.73758
chr11-122976787-122977900	5852	2	0.0209373
chr11-123194719-123196278	4508	3	0.050008
chr11-1232674-1233264	9783	79	0.648031
chr11-123430342-123431121	7877	1	0.00693226
chr11-123577386-123577674	5095	53	0.727866
chr11-1236355-1236576	3079	16	0.391543
chr11-12377611-12378316	5508	11	0.13853
chr11-1240854-1241368	10281	75	0.547913
chr11-124673489-124674150	3910	0	0
chr11-124739896-124740575	3561	0	0
chr11-124745494-124745748	6352	80	0.857242
chr11-124799482-124800623	27965	2	0.00154393
chr11-124865174-124866569	3382	1	0.0201709
chr11-124868817-124869115	10602	7	0.0453047
chr11-124876014-124876877	8191	1	0.00650814
chr11-124920919-124921458	12544	32	0.180333
chr11-125062835-125063761	4396	2	0.0285766
chr11-1252365-1252631	3768	44	0.746427
chr11-125495242-125496423	7083	1	0.00936359
chr11-125625339-125625971	5740	1	0.0106574
chr11-125904125-125904689	5700	21	0.282585
chr11-126211475-126212133	3250	0	0
chr11-126268465-126269271	7605	1	0.00719748
chr11-126282828-126283505	6774	1	0.0090205
chr11-127000331-127000656	3989	5	0.0909544
chr11-1276780-1277246	5222	55	0.775354
chr11-128521818-128522716	3035	2	0.0532827
chr11-128692777-128695170	4770	0	0
chr11-128810438-128810648	3329	40	0.733069
chr11-1290122-1290389	3452	39	0.854818
chr11-129372635-129376500	4070	3	0.0480176
chr11-129436765-129436987	5822	42	0.503636
chr11-129815843-129816316	4757	11	0.16991
chr11-130032917-130033317	8102	104	0.964008
chr11-130069042-130071020	9237	1	0.00705182
chr11-13008784-13011037	36731	69	0.137878
chr11-130123630-130123902	3299	49	0.835013
chr11-130159847-130160367	3665	1	0.0164082
chr11-130189649-130189855	3637	31	0.629205
chr11-130208279-130208772	5884	60	0.62842
chr11-130209305-130209746	7133	68	0.704251
chr11-130427507-130428622	20295	10	0.0325894
chr11-130448340-130450303	23023	36	0.110096
chr11-130473062-130473757	13541	103	0.538365
chr11-130546906-130547203	3994	24	0.454307
chr11-1309161-1310268	5815	1	0.011015
chr11-131910459-131911638	6338	8	0.0907931
chr11-132942768-132943180	3273	6	0.132004
chr11-133864807-133865269	5788	61	0.735811
chr11-133919378-133921373	32657	270	0.604066
chr11-133955443-133957562	4961	1	0.0205936
chr11-134068956-134069786	4082	0	0
chr11-134223671-134225597	9899	3	0.0178448
chr11-134253316-134254102	6775	1	0.00926787
chr11-134275666-134277286	9692	4	0.0244316
chr11-134331891-134332513	5155	3	0.0416022
chr11-134383567-134384257	21188	162	0.563803
chr11-1388890-1391116	8768	9	0.0734832
chr11-13962520-13964802	8525	6	0.0482238
chr11-14259196-14259618	5846	37	0.443747
chr11-14358263-14359306	5831	0	0
chr11-1443066-1443694	12250	90	0.542422
chr11-1445075-1445980	13647	119	0.641915
chr11-14520055-14520679	3236	0	0
chr11-1460549-1461414	9134	87	0.693923
chr11-14643508-14644657	16230	5	0.0178404
chr11-14644786-14645128	3763	0	0
chr11-1469968-1470295	3643	33	0.661235
chr11-14891355-14892225	12059	1	0.00797837
chr11-1556476-1557861	38289	229	0.431875
chr11-17013297-17014857	13086	3	0.0118494
chr11-17077293-17077959	6080	1	0.0104307
chr11-17387906-17388145	4311	34	0.615855
chr11-17475917-17477079	6837	6	0.062944
chr11-1747750-1749482	10471	79	0.552962
chr11-1753359-1753810	4983	47	0.652444
chr11-17544220-17544505	3185	4	0.0858248
chr11-1763576-1764323	5189	0	0
chr11-17719243-17722232	30266	97	0.230399
chr11-17734510-17736739	24371	99	0.305415
chr11-17771730-17772412	14064	136	0.740134
chr11-17779480-17779730	3137	37	0.846664
chr11-18012583-18013721	4708	1	0.0124669
chr11-18105745-18106164	6701	0	0
chr11-18189338-18189658	4417	40	0.674017
chr11-18526514-18527082	3931	0	0
chr11-18588464-18588916	4045	0	0
chr11-18698535-18699274	3260	0	0
chr11-18705774-18706180	6581	15	0.175374
chr11-18721144-18721966	5687	2	0.0270914
chr11-19116980-19117669	3754	0	0
chr11-1926302-1926728	4965	34	0.504986
chr11-19712391-19713791	4697	3	0.0425804
chr11-20156063-20157278	12806	29	0.168433
chr11-20159655-20160779	10027	21	0.144064
chr11-20363616-20364127	3157	0	0
chr11-20387210-20388235	10223	1	0.00569032
chr11-20601175-20601853	12298	44	0.264835
chr11-206976-209225	8643	1	0.00694256
chr11-2132804-2133110	4149	1	0.0150307
chr11-2137722-2141254	4188	6	0.0984866
chr11-2166259-2167015	13384	62	0.353298
chr11-22192627-22193774	3104	1	0.0219768
chr11-22341317-22341831	5514	11	0.137555
chr11-22625161-22625895	13457	1	0.00367048
chr11-2268875-2271702	16385	25	0.10367
chr11-22829220-22829838	5944	2	0.020903
chr11-23405407-23405803	6369	67	0.798223
chr11-235919-237290	12804	0	0
chr11-2376994-2378368	3445	1	0.0199581
chr11-2396421-2396763	3994	37	0.678525
chr11-2414066-2415421	20359	169	0.604728
chr11-2420841-2421172	4701	20	0.343364
chr11-2444908-2445588	10319	5	0.040809
chr11-24496679-24497192	6758	15	0.155866
chr11-27363073-27363323	3477	1	0.0175538
chr11-27471695-27472810	4940	0	0
chr11-27506317-27506970	3390	1	0.0204291
chr11-279073-281700	50028	129	0.184935
chr11-2883794-2885894	43151	43	0.0694216
chr11-289772-290010	5292	39	0.609843
chr11-2909060-2909863	11224	82	0.537011
chr11-2928559-2930526	21202	19	0.0601188
chr11-299390-299635	3453	33	0.651967
chr11-304080-304379	4501	40	0.649502
chr11-3056913-3057754	6116	2	0.0197053
chr11-3093531-3093798	3962	20	0.364165
chr11-31509585-31509954	3503	1	0.0197589
chr11-32090849-32091731	6831	1	0.0088877
chr11-3217988-3218758	19577	145	0.568307
chr11-3227886-3228608	13097	93	0.522038
chr11-32433329-32435765	18723	40	0.149585
chr11-32583638-32584183	3884	1	0.017579
chr11-32829615-32830405	11670	2	0.0108426
chr11-32892444-32893968	4007	0	0
chr11-33015661-33016371	4848	8	0.123329
chr11-33375947-33376948	5157	1	0.0192777
chr11-33700168-33700954	11234	26	0.170981
chr11-33773847-33774773	3430	0	0
chr11-3378770-3379189	4177	0	0
chr11-33868812-33869949	9826	0	0
chr11-34051440-34053156	6782	0	0
chr11-3413804-3414009	4185	42	0.741342
chr11-3422016-3423201	6379	0	0
chr11-34356683-34358176	24034	6	0.0171445
chr11-34438619-34439310	3245	0	0
chr11-34915782-34916833	10285	0	0
chr11-35138829-35139453	3717	0	0
chr11-35418875-35420335	7588	6	0.0534544
chr11-35618082-35619937	33833	7	0.010033
chr11-35662757-35663354	6607	6	0.0625919
chr11-3591421-3591655	3782	45	0.813162
chr11-35944067-35944904	3975	1	0.0151054
chr11-3667146-3667777	18766	232	0.924208
chr11-375664-377380	37132	339	0.676506
chr11-379296-380768	25748	261	0.75307
chr11-3797218-3798077	7095	0	0
chr11-394258-394619	7300	58	0.574107
chr11-396686-398880	16415	124	0.54224
chr11-400097-403400	19634	195	0.729377
chr11-406492-407871	17428	57	0.251196
chr11-4094460-4095259	4118	1	0.0160028
chr11-420266-421747	18183	214	0.861957
chr11-424956-425286	4376	32	0.5571
chr11-43311890-43312337	3750	0	0
chr11-43358692-43359490	5894	0	0
chr11-43680467-43681047	5877	1	0.00961799
chr11-43942077-43944498	24533	0	0
chr11-44308993-44310123	16956	15	0.0697644
chr11-449962-451178	7992	1	0.00643604
chr11-45285891-45286424	6466	6	0.0615794
chr11-45649648-45650862	32112	295	0.680865
chr11-45847192-45847862	16966	2	0.00689601
chr11-45885456-45886258	4354	0	0
chr11-45899837-45900616	7344	5	0.0440982
chr11-45902430-45903176	13788	108	0.569595
chr11-45921963-45923222	8777	8	0.0617952
chr11-46143101-46143301	3288	33	0.661586
chr11-46277862-46278665	3573	5	0.104199
chr11-46332542-46333640	7006	1	0.00873932
chr11-46347101-46348110	7672	6	0.0527183
chr11-46366356-46366985	13025	135	0.729804
chr11-46380319-46382523	8099	2	0.0190557
chr11-46385355-46385891	10051	115	0.835468
chr11-46705196-46705487	7622	72	0.687858
chr11-46917808-46918748	4895	0	0
chr11-46936620-46936842	3165	1	0.0186791
chr11-47176477-47177334	6980	0	0
chr11-47248684-47249082	5385	0	0
chr11-47338403-47338665	3266	24	0.544626
chr11-47355101-47355797	7814	87	0.794996
chr11-47378238-47378455	3289	1	0.0184932
chr11-47565297-47566056	9147	1	0.0070472
chr11-47578578-47579375	14615	1	0.00434987
chr11-47589587-47590875	33932	411	0.890455
chr11-47642026-47642779	5123	2	0.0319901
chr11-47766649-47767470	11683	1	0.00488461
chr11-47848242-47848804	6035	0	0
chr11-47980053-47981618	8512	0	0
chr11-48900174-48901190	6508	58	0.648599
chr11-489248-490115	15196	162	0.8146
chr11-49048169-49049170	6131	43	0.498338
chr11-49208166-49208488	7006	22	0.218671
chr11-494854-495156	4709	75	0.940682
chr11-49851566-49852600	7670	61	0.582354
chr11-49891768-49892783	8536	38	0.323803
chr11-49893392-49893820	3656	20	0.409285
chr11-554714-556560	45738	33	0.0506656
chr11-55872593-55873609	9842	75	0.56676
chr11-55874235-55874644	3378	26	0.577878
chr11-560383-561669	9123	4	0.0272386
chr11-57335368-57335956	4744	0	0
chr11-57459364-57461234	3462	2	0.0371285
chr11-57476209-57476990	17476	0	0
chr11-57514199-57515832	3783	1	0.0177393
chr11-57567576-57568013	4240	4	0.0692941
chr11-57712015-57712836	11493	1	0.00404117
chr11-57741259-57742097	8767	1	0.00633299
chr11-58578201-58579848	9279	0	0
chr11-59171574-59172835	8317	0	0
chr11-59615440-59615937	7080	1	0.00869724
chr11-597466-597700	3774	36	0.694227
chr11-59754953-59755654	3772	1	0.0161159
chr11-59810618-59810906	3353	2	0.038339
chr11-59898107-59898384	3607	39	0.783762
chr11-60767438-60767665	3671	24	0.487357
chr11-60841920-60842313	6212	0	0
chr11-60852452-60853638	27723	319	0.843629
chr11-60906126-60906712	4888	0	0
chr11-60924314-60925060	7261	0	0
chr11-60934211-60934747	10291	100	0.719816
chr11-60950957-60951521	13695	2	0.00667238
chr11-61007565-61008835	14597	61	0.305641
chr11-611692-611943	3357	39	0.845193
chr11-61294172-61295591	5915	1	0.00925243
chr11-61332602-61333500	4616	1	0.0212915
chr11-61339239-61339455	3430	38	0.778322
chr11-61392365-61392813	3387	0	0
chr11-61429450-61430225	11195	2	0.0117796
chr11-614761-616068	20908	143	0.504493
chr11-61508354-61509857	24725	17	0.0458267
chr11-61580337-61581566	7916	3	0.0222454
chr11-617227-617797	18884	201	0.776313
chr11-61743570-61744112	10673	98	0.659023
chr11-61752270-61752882	4644	2	0.02719
chr11-61777256-61778091	9697	22	0.154283
chr11-61815102-61817256	16252	1	0.00242798
chr11-61827525-61829238	4611	0	0
chr11-61891098-61892120	17028	3	0.0091035
chr11-61917120-61917744	5841	5	0.0648716
chr11-61955273-61956011	7022	9	0.109783
chr11-61967143-61968460	5843	0	0
chr11-62337308-62338164	5619	5	0.0698252
chr11-62371150-62371401	4734	38	0.591716
chr11-6240111-6240505	6473	76	0.823313
chr11-624781-625053	3796	53	0.838016
chr11-62591342-62592202	4775	0	0
chr11-6259847-6260077	4531	8	0.129237
chr11-62600983-62603019	24140	114	0.349982
chr11-62612167-62613084	5755	2	0.0244884
chr11-62621732-62622319	4387	0	0
chr11-62646161-62646821	4218	1	0.0153345
chr11-62653073-62653452	5261	1	0.011214
chr11-62664848-62665945	16910	4	0.0153258
chr11-62671576-62672331	6784	1	0.00840897
chr11-626729-628037	10359	35	0.251536
chr11-62678567-62679141	8152	1	0.00745399
chr11-62687602-62688396	18311	112	0.443061
chr11-6270109-6270328	6049	72	0.870269
[truncated: 10,800 more rows]

## Sheet: Tar_NA12878_RIMSseq_Rep2
region	total	error	Methylation
chr1-100037927-100038848	4816	1	0.0173704
chr1-100132575-100133198	5054	0	0
chr1-100213211-100213542	12324	119	0.753232
chr1-100266077-100266443	3798	1	0.0220927
chr1-100352154-100353343	3823	0	0
chr1-100539013-100540329	33273	18	0.0395906
chr1-1013950-1014471	12286	42	0.280853
chr1-1019389-1020963	8218	0	0
chr1-10326126-10326332	3940	47	0.863759
chr1-103525471-103526291	3876	0	0
chr1-10398492-10399940	10074	1	0.00763554
chr1-1040117-1044925	69063	591	0.670438
chr1-10430144-10431015	6896	0	0
chr1-1045689-1046020	8369	75	0.720673
chr1-1046773-1047131	5060	38	0.59826
chr1-10472121-10472743	6041	1	0.0101155
chr1-10474862-10475115	4040	1	0.0208363
chr1-1047795-1048232	12765	107	0.597129
chr1-1048827-1049049	4019	48	0.925147
chr1-1054895-1055314	4367	35	0.64574
chr1-106080772-106081232	10948	54	0.36995
chr1-10638243-10640041	35688	357	0.789388
chr1-10647754-10648083	8628	84	0.73641
chr1-10653782-10654146	8498	110	0.929629
chr1-10654345-10654651	4072	46	0.834504
chr1-10659811-10660524	15294	157	0.78874
chr1-10665131-10665560	13571	140	0.804945
chr1-1067284-1069938	4691	45	0.739522
chr1-10693717-10695464	10884	1	0.00697153
chr1-107056584-107057788	28287	5	0.011634
chr1-1071837-1072253	12947	97	0.585994
chr1-107480611-107480820	6520	7	0.0827749
chr1-107964630-107965419	5444	1	0.0132773
chr1-108199779-108200579	12274	2	0.0106052
chr1-1082720-1083010	4991	42	0.646893
chr1-1084439-1084646	3962	53	0.928294
chr1-108559917-108560590	5003	0	0
chr1-108746397-108747200	5089	0	0
chr1-108963060-108963592	5973	0	0
chr1-109090567-109091010	4456	0	0
chr1-109213843-109214476	4725	1	0.0152452
chr1-109249324-109250101	4653	1	0.0129337
chr1-109258433-109259078	23755	241	0.793816
chr1-109281692-109281904	5316	64	0.89545
chr1-109397453-109398272	17702	2	0.00654552
chr1-109426027-109426948	5820	0	0
chr1-109466341-109467165	10660	2	0.0122061
chr1-109483832-109484281	5950	0	0
chr1-109493924-109494321	13745	1	0.00379425
chr1-109548418-109548968	5612	2	0.0258349
chr1-109655920-109656505	6280	0	0
chr1-109667960-109668334	5232	3	0.0402361
chr1-109687617-109687992	4713	0	0
chr1-109739730-109740684	10353	12	0.0920803
chr1-109910522-109911267	3394	0	0
chr1-109984627-109985404	5617	1	0.01092
chr1-110067644-110070681	11463	11	0.0749424
chr1-110209635-110212172	30118	21	0.0518832
chr1-110223044-110223390	10495	99	0.783787
chr1-110338321-110340178	23490	1	0.00250044
chr1-110407271-110407918	11095	0	0
chr1-11058974-11060577	12676	10	0.0617263
chr1-110673623-110675675	42468	149	0.268405
chr1-11099331-11100079	7126	0	0
chr1-111203692-111204681	6360	1	0.00935083
chr1-111346517-111346917	4060	4	0.0759654
chr1-111448683-111449580	12100	1	0.00627222
chr1-111619583-111620215	22833	4	0.010556
chr1-111738431-111740655	7204	1	0.00829482
chr1-111755420-111756370	13428	2	0.0121457
chr1-111981847-111982763	26157	251	0.733581
chr1-111988938-111991151	13159	13	0.0736486
chr1-112508192-112509679	10589	7	0.049112
chr1-112618970-112619949	11185	1	0.00615652
chr1-112674854-112675475	3590	0	0
chr1-112714264-112715438	11950	0	0
chr1-112722952-112723165	5123	20	0.307295
chr1-113072970-113073638	5814	0	0
chr1-113198852-113199123	5156	58	0.867939
chr1-113389959-113391448	15568	3	0.0156263
chr1-113811752-113812678	24472	3	0.0068347
chr1-113929344-113930277	6970	0	0
chr1-114152515-114154050	5600	1	0.0147699
chr1-114510440-114511643	23223	2	0.00437497
chr1-114780455-114780841	4950	0	0
chr1-11501310-11502099	25868	227	0.693209
chr1-115089230-115089963	5565	0	0
chr1-11529782-11529987	6487	58	0.660916
chr1-11536326-11536565	6898	52	0.605527
chr1-115837739-115839743	44252	42	0.0711846
chr1-115976526-115976916	5181	0	0
chr1-116372670-116374191	5238	2	0.0272786
chr1-11648711-11649220	8198	49	0.44723
chr1-11650403-11650731	8197	4	0.032998
chr1-11654161-11655249	6174	4	0.0468552
chr1-116570339-116571261	6129	1	0.0132243
chr1-11680343-11681660	5629	16	0.238949
chr1-116909582-116910830	7438	6	0.0656797
chr1-116944628-116945023	14839	132	0.720183
chr1-117059767-117060648	7537	1	0.0109193
chr1-117121648-117122526	3050	1	0.0207865
chr1-11719510-11719959	3308	0	0
chr1-11735919-11736206	3190	1	0.0266884
chr1-11762083-11762306	7604	4	0.039272
chr1-11805406-11806509	3835	1	0.0231582
chr1-11838337-11838675	9297	111	0.873246
chr1-118987197-118988089	8387	4	0.0375902
chr1-119140252-119140788	3348	0	0
chr1-11925587-11926078	7787	0	0
chr1-11934693-11934912	5431	1	0.011367
chr1-119622680-119624003	54885	600	0.867838
chr1-119647755-119648628	3269	1	0.0260569
chr1-1197448-1197838	16503	128	0.599219
chr1-120068735-120069889	10425	1	0.00697944
chr1-120176144-120176534	3450	1	0.0185346
chr1-120340913-120342284	6083	0	0
chr1-1206291-1206770	10488	3	0.020782
chr1-12063432-12064091	6848	0	0
chr1-120724171-120724849	5988	0	0
chr1-121097208-121098110	7686	7	0.0650041
chr1-121118209-121118586	9122	7	0.0616181
chr1-121183932-121187361	3487	1	0.0257953
chr1-1213676-1214144	8286	16	0.142669
chr1-12166820-12167655	3892	0	0
chr1-1217143-1217754	11718	154	0.97661
chr1-1218405-1219039	9052	94	0.787893
chr1-12191278-12191928	6277	60	0.751893
chr1-1231622-1233605	44779	365	0.658125
chr1-1242506-1242827	7347	54	0.549524
chr1-1246377-1247090	9749	3	0.0259316
chr1-125118140-125119694	5712	57	0.748486
chr1-1255143-1255419	7314	84	0.804345
chr1-12616979-12618636	9408	0	0
chr1-1286018-1294783	83197	763	0.709464
chr1-1296482-1298279	13264	153	0.869838
chr1-1307021-1309805	38537	107	0.208336
chr1-1312607-1313113	10519	112	0.82488
chr1-1318943-1319168	7986	89	0.849913
chr1-1324264-1325255	7738	1	0.0100786
chr1-1327286-1328040	17377	189	0.887527
chr1-1331706-1331906	4868	57	0.865534
chr1-1332056-1333606	33212	307	0.725281
chr1-1336046-1336694	12413	115	0.714568
chr1-1338107-1340460	42577	452	0.822639
chr1-1348554-1351571	7979	0	0
chr1-13513011-13514118	16957	15	0.0695548
chr1-1354328-1355746	48128	112	0.182528
chr1-13554916-13555117	3505	37	0.79724
chr1-13583643-13584373	11204	10	0.0673475
chr1-13699987-13700705	9813	1	0.00779627
chr1-1373761-1375659	23009	153	0.510755
chr1-13748773-13749963	6464	0	0
chr1-1387265-1387544	7817	91	0.823031
chr1-1398692-1400222	13737	1	0.0062983
chr1-1406729-1407555	9120	3	0.0222102
chr1-1419780-1420620	19920	37	0.142575
chr1-1426181-1426407	5837	24	0.303926
chr1-1427517-1427953	11006	26	0.177452
chr1-1435561-1436069	5639	1	0.0110099
chr1-143736122-143736547	5359	6	0.0890755
chr1-143884629-143885489	3644	3	0.0645861
chr1-143904250-143904674	5423	59	0.836895
chr1-143905323-143905942	9088	4	0.0357388
chr1-1439082-1440204	29985	267	0.697543
chr1-144418772-144419244	3418	0	0
chr1-145214834-145216221	3151	2	0.0575038
chr1-145232835-145233040	3616	0	0
chr1-1454176-1454509	3962	32	0.636377
chr1-145453912-145454666	11154	42	0.283474
chr1-145607839-145608571	3156	0	0
chr1-145823594-145824433	5097	0	0
chr1-145845533-145845932	8108	1	0.00993711
chr1-145858693-145859938	6623	0	0
chr1-145918452-145919050	6282	0	0
chr1-145927162-145927504	4254	5	0.0938573
chr1-145957607-145958063	10105	1	0.00741767
chr1-145960386-145962107	43158	11	0.0187421
chr1-14598115-14599497	11931	8	0.0457614
chr1-146019305-146019601	13200	25	0.142558
chr1-1460706-1460958	5414	32	0.479744
chr1-146228090-146229263	9103	2	0.0147378
chr1-147050657-147050993	3811	37	0.699202
chr1-1471465-1472441	4602	0	0
chr1-147171892-147172922	8770	1	0.00672496
chr1-147178044-147178273	5381	7	0.10541
chr1-147242440-147243628	5554	0	0
chr1-147669721-147670796	4433	0	0
chr1-147908012-147908355	9867	87	0.701909
chr1-147928242-147928974	3925	0	0
chr1-148146123-148146930	12826	126	0.75052
chr1-148148926-148149685	8169	100	0.926279
chr1-1481906-1482373	4656	47	0.779289
chr1-148317537-148317864	3310	22	0.527066
chr1-148458797-148460187	8387	1	0.00942219
chr1-1484847-1485304	5012	90	0.768815
chr1-148678843-148680005	11682	4	0.022389
chr1-149175502-149177055	5544	1	0.0127915
chr1-14923878-14925049	14712	8	0.0369089
chr1-149390845-149391541	4235	0	0
chr1-149606800-149608359	6277	1	0.0129577
chr1-149792573-149793433	11262	0	0
chr1-149811970-149812469	6284	4	0.0449938
chr1-149813038-149813657	11255	4	0.0238251
chr1-149886220-149887920	43707	3	0.00319332
chr1-149899527-149900393	12828	106	0.640487
chr1-149927734-149928001	4511	1	0.0187787
chr1-150149506-150150888	4995	1	0.0164454
chr1-150268648-150269254	4079	0	0
chr1-150557180-150557428	5874	43	0.573801
chr1-150578853-150579877	29892	5	0.0111612
chr1-150629235-150629725	3700	1	0.0229
chr1-15065686-15066023	4994	53	0.847836
chr1-1509209-1509469	5075	42	0.649152
chr1-151047736-151048151	7931	2	0.0175921
chr1-151131210-151133624	48070	475	0.761935
chr1-1511499-1512825	4620	0	0
chr1-151198372-151199056	4692	0	0
chr1-151281183-151283293	3432	0	0
chr1-151399382-151400106	8892	2	0.0145826
chr1-151511098-151511642	4147	0	0
chr1-151540186-151540723	6269	1	0.00993829
chr1-151611899-151612729	15938	3	0.0118243
chr1-151762970-151763617	10653	0	0
chr1-151837985-151839208	37003	14	0.0244779
chr1-151909288-151909931	4524	0	0
chr1-1519923-1520512	7074	75	0.80958
chr1-152107522-152112739	130398	442	0.271164
chr1-1522575-1523649	14489	144	0.767842
chr1-152515582-152515794	4344	7	0.121633
chr1-1529129-1529426	4659	63	0.893376
chr1-153260997-153261837	41102	19	0.0319797
chr1-1535225-1536210	14347	141	0.759185
chr1-153658590-153658893	7992	0	0
chr1-153670843-153671053	3111	0	0
chr1-153678355-153679899	23565	22	0.0715678
chr1-153689728-153689963	4839	52	0.803096
chr1-153775180-153776222	37042	5	0.00841875
chr1-153941868-153942102	8761	89	0.792375
chr1-153958071-153958654	9578	0	0
chr1-1539583-1541289	15028	11	0.0566528
chr1-153990752-153991034	3679	1	0.0173319
chr1-15409555-15410732	10431	0	0
chr1-154182793-154183450	3741	0	0
chr1-154220368-154221312	8542	0	0
chr1-154272235-154272813	3447	0	0
chr1-154405195-154405969	5107	0	0
chr1-154501632-154503223	17124	47	0.202862
chr1-154558206-154559089	13101	0	0
chr1-154567758-154568097	4147	3	0.0526441
chr1-154571343-154572237	27715	271	0.791877
chr1-154607905-154608321	6106	2	0.0208632
chr1-154772111-154772388	6156	75	0.898009
chr1-154936487-154937455	3976	0	0
chr1-154961453-154962259	32466	2	0.00254414
chr1-154974267-154975010	6608	1	0.0119264
chr1-155050513-155051856	14785	2	0.0107057
chr1-155062450-155064102	8377	25	0.243464
chr1-155078680-155082545	7845	0	0
chr1-155084712-155085580	11250	4	0.0273969
chr1-155135532-155136135	13703	1	0.00500676
chr1-155172867-155173462	8019	1	0.00994962
chr1-155188537-155192004	15842	91	0.410052
chr1-155208757-155209168	14718	1	0.00367362
chr1-15524104-15525086	4924	0	0
chr1-155250292-155250758	15114	3	0.0132928
chr1-155262022-155262521	5026	2	0.0301093
chr1-155269488-155269703	6629	96	0.9878
chr1-155277201-155277957	13523	3	0.0143936
chr1-155294528-155295745	31960	121	0.292331
chr1-155320816-155321210	14206	4	0.0223758
chr1-155322679-155325642	48251	48	0.0739246
chr1-155562496-155563489	7904	4	0.0431347
chr1-155688042-155689334	21036	3	0.0113174
chr1-15584594-15585113	10464	4	0.0309304
chr1-155934282-155934516	5578	1	0.0146102
chr1-155950861-155951107	7551	77	0.77688
chr1-155977888-155978699	7565	1	0.00793066
chr1-156020599-156020989	3103	0	0
chr1-156053172-156054188	6706	0	0
chr1-156076553-156077593	33407	234	0.546606
chr1-156081449-156081933	7359	2	0.0173811
chr1-156114696-156115347	11548	0	0
chr1-156135917-156136380	9594	100	0.834293
chr1-15617327-15617861	5435	0	0
chr1-156212794-156213306	4232	1	0.0148889
chr1-156245578-156246108	14940	11	0.0582509
chr1-156282449-156282924	4564	0	0
chr1-156291409-156291634	7430	63	0.617114
chr1-156368968-156369460	4449	6	0.102681
chr1-156420612-156421927	7541	1	0.0105394
chr1-156572308-156572710	5720	2	0.0222201
chr1-156591885-156592088	4597	2	0.0291252
chr1-156623866-156625674	41330	33	0.0616902
chr1-156646762-156647154	12162	72	0.486352
chr1-156657551-156657784	4961	1	0.0178583
chr1-156676501-156677468	22070	33	0.120378
chr1-156705067-156706862	3016	0	0
chr1-156750956-156752277	15428	3	0.0133725
chr1-156767244-156768221	11808	1	0.00457996
chr1-156813732-156814245	12276	3	0.017535
chr1-15684084-15685007	9968	1	0.00558242
chr1-156845090-156846000	20375	81	0.321554
chr1-156848911-156849400	8697	52	0.469322
chr1-156859013-156861310	9498	16	0.127206
chr1-156907978-156908350	10950	95	0.684675
chr1-156920452-156921014	7874	17	0.168294
chr1-156923728-156924440	9588	5	0.0385793
chr1-156927408-156928004	16008	21	0.102836
chr1-15727122-15727480	8009	90	0.833869
chr1-15731803-15732010	4323	57	0.823166
chr1-1574103-1575367	5858	0	0
chr1-15744134-15744358	4789	35	0.586419
chr1-15746824-15747026	3951	33	0.656651
chr1-157993611-157994157	3666	0	0
chr1-158177644-158178064	4679	27	0.442359
chr1-158180831-158181713	12119	6	0.0370108
chr1-15847395-15848901	13417	2	0.00885215
chr1-159171413-159171928	3575	6	0.123524
chr1-15934376-15934660	6492	81	0.948249
chr1-15943406-15943764	9274	111	0.885388
chr1-15944097-15945087	23915	308	0.978388
chr1-159780627-159781563	14806	4	0.0201498
chr1-159854217-159855130	16840	2	0.00875106
chr1-1598952-1600756	20926	44	0.162397
chr1-159900112-159900353	3130	20	0.504732
chr1-159929643-159930063	12244	106	0.691566
chr1-160031506-160032199	6751	1	0.0105245
chr1-160083932-160084948	32573	137	0.336423
chr1-160098251-160098640	4362	1	0.019052
chr1-160205301-160205912	3781	0	0
chr1-160343139-160343548	6799	2	0.0192125
chr1-160419314-160419596	6377	72	0.863571
chr1-16073154-16073496	4313	4	0.081117
chr1-161020929-161021435	5171	0	0
chr1-161038588-161039040	13998	16	0.0865818
chr1-161079557-161079947	11259	121	0.830767
chr1-161098273-161099011	17820	24	0.0991143
chr1-161117933-161118322	10556	2	0.0123899
chr1-161166212-161166896	5903	1	0.010184
chr1-161177272-161177661	6377	1	0.0127209
chr1-161202020-161202466	4193	2	0.0322307
chr1-161258688-161259238	8288	26	0.231323
chr1-161314329-161314661	4181	0	0
chr1-16137882-16138126	6228	33	0.428444
chr1-16148617-16148829	5713	50	0.68932
chr1-1615074-1616635	28301	21	0.0534677
chr1-161524235-161525566	15850	42	0.214454
chr1-16154990-16155965	4863	1	0.0164806
chr1-161605745-161607118	13455	138	0.817679
chr1-161725848-161727508	28957	5	0.0114408
chr1-161749625-161750286	9062	1	0.00877666
chr1-161983827-161984249	7230	71	0.676563
chr1-162023233-162024341	4149	16	0.303944
chr1-16206423-16208085	26524	93	0.260778
chr1-162069429-162070262	4443	1	0.0187699
chr1-1623208-1623979	24404	225	0.735163
chr1-162367087-162367531	10531	101	0.732679
chr1-162497810-162498237	9217	1	0.00838171
chr1-1625401-1625675	7044	67	0.77726
chr1-1626670-1634630	81863	405	0.382893
chr1-16367127-16367775	5880	0	0
chr1-16440504-16441308	6187	0	0
chr1-165354955-165357091	4137	4	0.0744804
chr1-165698308-165698580	7141	2	0.0177992
chr1-165768596-165769112	5632	0	0
chr1-165827417-165828446	8834	1	0.0086567
chr1-1658613-1659481	4010	0	0
chr1-166165022-166167211	9960	6	0.0470558
chr1-16646991-16648550	38700	134	0.252648
chr1-166875760-166876536	5033	0	0
chr1-166920540-166921412	22167	72	0.25614
chr1-166988984-166989446	3529	48	0.937844
chr1-16707274-16708233	9485	15	0.120816
chr1-167219894-167222124	4278	0	0
chr1-167439276-167439900	3211	0	0
chr1-167553233-167553833	14281	1	0.00482019
chr1-16758917-16760479	5651	39	0.520648
chr1-167630236-167630602	5708	0	0
chr1-167721742-167722615	5912	0	0
chr1-167820159-167820409	4247	4	0.0822525
chr1-167935790-167936877	4404	0	0
chr1-168056271-168056484	6972	93	0.842343
chr1-168136079-168136920	8423	0	0
chr1-168178726-168179399	4865	2	0.0301223
chr1-168225708-168226601	4287	0	0
chr1-16888927-16889599	4407	3	0.0535074
chr1-169105529-169107173	5642	2	0.0250472
chr1-169485321-169486339	10026	0	0
chr1-16955324-16955561	7853	66	0.683176
chr1-16960796-16961189	7522	2	0.0176164
chr1-16966410-16966620	4552	36	0.63711
chr1-17005391-17005598	4254	50	0.868957
chr1-17011335-17012087	4548	0	0
chr1-17053962-17054227	4775	1	0.017387
chr1-170664162-170665037	7925	4	0.037664
chr1-17119157-17119593	5694	0	0
chr1-171670808-171671084	5152	50	0.766249
chr1-171784277-171784489	4264	54	0.974777
chr1-171841328-171842185	8592	5	0.0442959
chr1-172532771-172533405	13702	1	0.00502755
chr1-173476840-173477966	5791	4	0.0488029
chr1-17437577-17439981	10766	0	0
chr1-174999354-175000488	6144	1	0.0130859
chr1-175023230-175023660	3425	0	0
chr1-175079415-175079738	10260	112	0.855668
chr1-1753935-1754532	12151	117	0.757749
chr1-176206576-176207675	13488	2	0.0105796
chr1-17622958-17623175	4209	29	0.564554
chr1-17696987-17697297	11127	95	0.673484
chr1-177164257-177164710	7763	11	0.104249
chr1-178094119-178094711	8265	5	0.0490874
chr1-17825884-17826347	10578	36	0.272759
chr1-178486665-178487151	5629	17	0.210735
chr1-179081941-179082813	12391	0	0
chr1-179229029-179230065	12004	0	0
chr1-179365660-179366203	3090	0	0
chr1-179575586-179576172	12828	37	0.226505
chr1-179586230-179586915	5175	33	0.507067
chr1-179882348-179883236	15443	2	0.00787097
chr1-180154421-180155449	11543	1	0.00492962
chr1-180228985-180235840	4529	0	0
chr1-180631892-180632680	6691	0	0
chr1-180935181-180935575	16613	135	0.639449
chr1-181022584-181023013	4821	1	0.0127417
chr1-18107612-18108319	6291	5	0.0575845
chr1-181088368-181090040	33946	1	0.00141996
chr1-181413155-181413712	16249	150	0.717735
chr1-181483571-181483937	9419	17	0.134952
chr1-181798358-181798757	9039	70	0.608799
chr1-182056470-182057376	27180	140	0.413993
chr1-182390563-182392428	13273	1	0.00419042
chr1-182604241-182604625	3322	0	0
chr1-182952685-182953509	18539	79	0.331832
chr1-183022670-183024235	11533	2	0.012079
chr1-183416866-183418529	3355	5	0.116477
chr1-183472491-183473120	6609	0	0
chr1-183635149-183636198	5957	0	0
chr1-18365381-18365587	6291	32	0.38976
chr1-18376802-18377002	5258	35	0.506274
chr1-184036226-184037632	14025	5	0.0233425
chr1-184051648-184051920	6200	0	0
chr1-184754119-184755304	9298	2	0.0146188
chr1-18482380-18483173	27230	296	0.849172
chr1-184973731-184974645	6085	0	0
chr1-18630402-18633335	6187	3	0.0339217
chr1-18854452-18854975	12023	93	0.626774
chr1-18877381-18877740	8435	90	0.791976
chr1-18883133-18883420	5909	68	0.842557
chr1-1889967-1891833	8841	0	0
chr1-18902335-18903140	6313	2	0.024178
chr1-18955455-18957389	25569	1	0.00217213
chr1-1918660-1919952	15492	2	0.010345
chr1-19209658-19210552	11141	2	0.0148721
chr1-19251391-19252214	10810	0	0
chr1-19273756-19274448	12935	94	0.569008
chr1-19288505-19289166	11855	76	0.513058
chr1-193059092-193060141	15285	1	0.00341895
chr1-193105045-193105434	5221	0	0
chr1-19311714-19312815	14869	1	0.00437967
chr1-19485210-19486150	5163	1	0.0115086
chr1-19596848-19597508	5555	0	0
chr1-19664654-19666295	16892	38	0.183162
chr1-19679018-19679372	11115	107	0.734003
chr1-197146149-197146861	11600	1	0.00589196
chr1-197774802-197775658	4342	0	0
chr1-197902459-197903169	12076	0	0
chr1-197917959-197918661	4777	1	0.0175037
chr1-197921349-197921694	6598	30	0.332101
chr1-19882315-19882969	18362	3	0.0111095
chr1-200039265-200039919	6194	4	0.0515633
chr1-200147569-200148076	11103	107	0.747521
chr1-200739194-200739820	4348	1	0.0190888
chr1-200873069-200874260	33103	129	0.309238
chr1-200911466-200912142	12324	119	0.72491
chr1-201000496-201000810	5809	78	0.967516
chr1-201023155-201023871	8853	0	0
chr1-201114331-201115439	22103	100	0.346397
chr1-201226903-201227139	5802	37	0.497858
chr1-201283325-201284520	5957	26	0.336766
chr1-201399134-201399904	10685	25	0.183943
chr1-201468392-201469520	11685	13	0.0824331
chr1-201506758-201507388	16602	0	0
chr1-201647914-201650660	25292	161	0.496151
chr1-201739660-201740301	4171	0	0
chr1-201829086-201829570	5053	0	0
chr1-201888787-201889178	5458	2	0.0260275
chr1-201955209-201955925	3836	0	0
chr1-201982458-201983451	18874	1	0.00338542
chr1-202144024-202145015	6222	1	0.0130995
chr1-202193881-202194262	6663	0	0
chr1-202214066-202214535	5724	11	0.147239
chr1-202348530-202349068	10407	2	0.0137474
chr1-2025608-2025947	4497	15	0.257566
chr1-2027976-2028428	7627	43	0.446819
chr1-202806876-202808599	9844	2	0.0149853
chr1-202888556-202889266	6610	0	0
chr1-2029504-2029709	3581	31	0.659262
chr1-202966918-202967499	4833	0	0
chr1-2029969-2030411	10900	86	0.623963
chr1-203007201-203007900	10389	0	0
chr1-203075595-203076262	7511	5	0.0535587
chr1-203305170-203306210	6073	0	0
chr1-20343074-20343525	10979	34	0.231169
chr1-203861380-203861773	3201	1	0.0227966
chr1-204151271-204152433	12661	7	0.0434936
chr1-204190471-204190705	7711	1	0.0103601
chr1-204257417-204257780	10341	79	0.577535
chr1-204411186-204412031	6345	0	0
chr1-20483970-20487018	8911	5	0.0452935
chr1-2049813-2051773	5369	1	0.0167237
chr1-204981855-204982082	3539	15	0.328676
chr1-205069657-205070025	5976	55	0.721251
chr1-20507924-20508390	4007	1	0.0154255
chr1-205210836-205211782	12353	0	0
chr1-205228505-205228831	4355	2	0.0357215
chr1-205241568-205242036	12114	99	0.635438
chr1-205268985-205269418	12043	137	0.905023
chr1-205321105-205321907	12472	5	0.0279296
chr1-205343366-205344448	8390	18	0.152053
chr1-20552402-20554002	31740	18	0.0407498
chr1-205528876-205529462	11410	46	0.312823
chr1-205568624-205569438	6172	2	0.0273506
chr1-205591962-205592345	3138	1	0.0271628
chr1-205662850-205663126	7273	78	0.820644
chr1-205749111-205750217	4224	0	0
chr1-205849771-205850063	4286	46	0.806878
chr1-20633372-20634058	15476	6	0.0294046
chr1-206506904-206508111	17452	4	0.0155107
chr1-20661024-20661745	7370	1	0.010845
chr1-206635179-206635842	6136	0	0
chr1-206684882-206686306	7811	1	0.0104246
chr1-206909349-206909857	12882	12	0.0733058
chr1-20704516-20704876	11315	131	0.915012
chr1-207050745-207051105	9304	1	0.00604888
chr1-20717340-20718278	11004	27	0.196764
chr1-207321199-207322019	4583	0	0
chr1-207454187-207454935	7486	1	0.0107695
chr1-207496293-207496670	5409	1	0.0150329
chr1-207644967-207645607	8407	10	0.084737
chr1-207669461-207669914	4294	19	0.348238
chr1-207751827-207752619	7061	0	0
chr1-207910754-207911168	4805	0	0
chr1-207963322-207963838	11816	1	0.00466959
chr1-209625805-209626009	4765	56	0.824832
chr1-209675099-209676083	8568	4	0.0365548
chr1-209937835-209938709	5594	3	0.0413011
chr1-210328744-210329449	15895	1	0.00337846
chr1-210683718-210683920	5934	61	0.798404
chr1-211133326-211134333	4810	6	0.0913967
chr1-211207065-211207441	5845	67	0.890442
chr1-211258764-211260792	11441	0	0
chr1-211326590-211327294	5545	0	0
chr1-211416336-211416879	9794	85	0.665237
chr1-211478965-211479412	10477	24	0.171327
chr1-211577780-211579835	26057	1	0.00168797
chr1-211675300-211675834	3254	0	0
chr1-21176623-21177343	4857	2	0.0356354
chr1-211830090-211830938	4072	0	0
chr1-212035496-212036022	3315	0	0
chr1-21225082-21225438	6426	73	0.857568
chr1-212284626-212286352	7357	1	0.00957518
chr1-212414250-212414942	6052	0	0
chr1-212432764-212433502	6196	2	0.0271455
chr1-212699119-212700706	4795	0	0
chr1-212791525-212792005	7973	1	0.00740732
chr1-212858018-212858777	16134	1	0.00317818
chr1-21289888-21290608	15043	0	0
chr1-212950306-212951750	29690	18	0.0469747
chr1-213015178-213015482	5948	0	0
chr1-213051270-213051525	5028	1	0.0166543
chr1-21344868-21345826	6928	2	0.0183022
chr1-21427996-21429502	14138	90	0.503379
chr1-214280754-214281704	10858	2	0.0131403
chr1-21436578-21436923	6239	19	0.247707
chr1-214383823-214384099	7456	71	0.723033
chr1-214605566-214606366	12511	153	0.956
chr1-214608320-214609213	15860	170	0.823556
chr1-214870435-214870660	5392	54	0.730411
chr1-215082709-215083293	3743	5	0.106413
chr1-215567165-215567923	6831	0	0
chr1-21603687-21603887	6721	61	0.669004
chr1-2169415-2169746	3183	21	0.506597
chr1-21782637-21783768	11196	2	0.0142911
chr1-21814407-21814914	16018	56	0.268803
chr1-21823191-21823404	3701	26	0.551164
chr1-21828808-21829072	6867	57	0.650847
chr1-2184994-2185362	5879	57	0.73788
chr1-21864857-21865099	8053	107	0.901419
chr1-21884500-21884825	8172	64	0.615127
chr1-21887410-21887626	6045	45	0.575683
chr1-2189579-2190379	4275	25	0.471254
chr1-219173768-219174230	4262	2	0.0343527
chr1-21936854-21937784	4823	1	0.0129007
chr1-219927791-219928805	22434	22	0.0759174
chr1-220046075-220046719	5583	0	0
chr1-220093973-220094592	9844	1	0.00572984
chr1-220272139-220272591	3305	0	0
chr1-220528120-220529006	7494	1	0.0109345
chr1-220690166-220690907	16944	4	0.016043
chr1-220786675-220787261	12119	10	0.0595467
chr1-220878625-220880331	18395	5	0.0195144
chr1-220882151-220882458	4232	48	0.771868
chr1-220884122-220884870	12697	115	0.699888
chr1-22120028-22120450	8277	106	0.925445
chr1-2212761-2213058	3605	6	0.127033
chr1-22142420-22143759	4671	0	0
chr1-222618058-222618741	5175	1	0.0161003
chr1-2226774-2229734	24519	11	0.0336533
chr1-222711985-222712888	3339	0	0
chr1-223363501-223365286	5029	1	0.012369
chr1-223393301-223393926	17017	42	0.187962
chr1-223394340-223394644	8064	84	0.827163
chr1-223712289-223713121	11279	0	0
chr1-223748641-223749342	6521	10	0.125547
chr1-223845384-223846561	9162	0	0
chr1-224114207-224114770	6758	0	0
chr1-224182884-224184053	7290	0	0
chr1-224356822-224357522	5979	0	0
chr1-224615936-224617612	8702	10	0.0825033
chr1-224929519-224930079	12818	2	0.0100369
chr1-225652569-225654093	26261	2	0.00403004
chr1-22576310-22576920	15593	154	0.765186
chr1-225887451-225887980	11446	72	0.492905
chr1-225923943-225924852	8030	5	0.0447617
chr1-22593281-22593714	7545	38	0.383328
chr1-225939413-225939995	13538	86	0.505566
chr1-225999103-225999635	5252	1	0.0117652
chr1-22600653-22601049	9577	57	0.454953
chr1-226186335-226187059	13487	2	0.00887163
chr1-226223307-226224179	15344	5	0.0239081
chr1-226308661-226309800	25302	1	0.00234639
chr1-226407633-226408238	5574	1	0.0145552
chr1-22647558-22647810	5132	35	0.552743
chr1-226548680-226549711	11785	2	0.0108133
chr1-226641882-226642102	3462	41	0.865974
chr1-226736860-226738852	20225	21	0.0793062
chr1-226976039-226976536	11976	115	0.727164
chr1-22710331-22711869	3703	0	0
chr1-227734943-227735730	16377	0	0
chr1-227786728-227787126	6982	55	0.589672
chr1-227787595-227788869	22432	7	0.0199315
chr1-227816127-227816382	4481	37	0.668002
chr1-22784412-22785074	12260	149	0.925587
chr1-227925250-227925514	7501	67	0.708384
chr1-227946722-227948581	3365	0	0
chr1-228006396-228008811	6009	5	0.0602047
chr1-228058931-228059496	18073	46	0.196436
chr1-228101969-228103483	37952	9	0.0161474
chr1-228107668-228107868	3392	42	0.865908
chr1-228139808-228140859	9004	1	0.00855866
chr1-228157677-228158999	41578	429	0.814091
chr1-228165408-228166285	13795	2	0.0113124
chr1-228173917-228174990	8058	66	0.635894
chr1-228211771-228214336	62863	508	0.652301
chr1-228215532-228215827	6280	67	0.813103
chr1-228216448-228216696	6113	62	0.786162
chr1-228217017-228217312	6741	76	0.889086
chr1-228274185-228274438	7294	68	0.740659
chr1-228275549-228276787	20223	43	0.165514
chr1-228280264-228280796	13453	95	0.561714
chr1-228286135-228286342	4958	40	0.600451
chr1-228315856-228317061	18428	167	0.724781
chr1-228321853-228322062	5212	63	0.875052
chr1-228360377-228360629	8394	62	0.569089
chr1-228378249-228379420	14223	51	0.283029
chr1-228394728-228395193	13264	137	0.794279
chr1-228406111-228407012	18965	2	0.00598347
chr1-228424880-228425402	19068	257	0.97599
chr1-228457407-228458733	33785	8	0.0167208
chr1-228463747-228464828	12707	3	0.0192978
chr1-228486646-228487914	13111	2	0.00955785
chr1-228646196-228648421	10401	19	0.145187
chr1-228735064-228736550	11449	19	0.123354
chr1-229270900-229271382	5781	0	0
chr1-229342163-229343188	11524	1	0.00754066
chr1-229431460-229434937	44161	162	0.292797
chr1-229507967-229508546	9065	1	0.00780507
chr1-22953061-22954076	27136	112	0.327225
chr1-229558026-229559327	15931	2	0.00736472
chr1-229594595-229594870	5924	68	0.799732
chr1-230066748-230068462	7565	0	0
chr1-23019322-23020184	14437	1	0.00352761
chr1-230332759-230333104	4012	36	0.637728
chr1-230356971-230357199	5685	54	0.77245
chr1-2303870-2304228	8621	92	0.834909
chr1-230425358-230426956	14434	3	0.0170592
chr1-2305004-2307630	17445	204	0.886971
chr1-230642332-230642847	4817	1	0.0171269
chr1-230867886-230868909	16189	3	0.0128995
chr1-230978126-230979127	13972	0	0
chr1-231039317-231041263	13502	2	0.00912171
chr1-231162067-231163651	27866	94	0.270009
chr1-231241051-231241497	6330	0	0
chr1-231337520-231338636	16975	2	0.00715383
chr1-231420936-231422701	26207	2	0.00396369
chr1-231528254-231528862	3457	0	0
chr1-231626713-231627369	4570	0	0
chr1-232805309-232805961	26099	3	0.00665263
chr1-232950446-232950849	4875	1	0.017042
chr1-232986182-232986390	5827	60	0.801873
chr1-233295404-233295794	8286	1	0.00691111
chr1-233327252-233328765	26847	1	0.0019159
chr1-2334569-2334993	3009	28	0.700554
chr1-233613699-233614804	11256	3	0.0190555
chr1-233904708-233905711	12985	23	0.140056
chr1-234214139-234214725	4808	2	0.0355768
chr1-234231390-234231750	10246	103	0.767182
chr1-23424304-23425170	6431	1	0.0137314
chr1-234356739-234356967	4683	27	0.452702
chr1-23436662-23437478	15933	95	0.457216
chr1-234373238-234373755	10588	1	0.0053971
chr1-234478191-234479226	34777	5	0.00848629
chr1-234608531-234611278	34493	2	0.00294099
chr1-23483485-23484862	9105	2	0.0148472
chr1-235128426-235129072	5122	1	0.0161433
chr1-235160950-235161402	6734	1	0.00927739
chr1-23530542-23531597	8400	0	0
chr1-235503790-235505319	5239	0	0
chr1-23559192-23559721	9380	0	0
chr1-235993574-235993971	11766	142	0.892303
chr1-236064383-236065517	9121	8	0.0666509
chr1-236142010-236143374	15086	5	0.0231383
chr1-236281304-236282400	6396	1	0.00935382
chr1-236395160-236395850	7356	9	0.0972584
chr1-236686173-236687023	8255	12	0.116449
chr1-236795015-236795902	16796	2	0.00722182
chr1-237041827-237043344	7146	9	0.0920691
chr1-23743206-23744125	9274	3	0.0237192
chr1-23778013-23778773	8699	1	0.00889204
chr1-237783888-237784148	5171	52	0.811165
chr1-2384915-2385310	6287	84	0.979669
chr1-23867765-23868500	17704	3	0.0103745
chr1-23902626-23903047	10051	52	0.416172
chr1-2391043-2392325	9737	1	0.00597135
chr1-239386956-239388039	5957	8	0.106742
chr1-23979874-23980527	6313	0	0
chr1-240091660-240093763	51867	69	0.0992632
chr1-240207560-240208226	3778	33	0.626045
chr1-2402112-2402733	5449	84	1
chr1-240492875-240493420	12299	122	0.759685
chr1-2408438-2408807	8959	91	0.823953
chr1-2411947-2413278	9743	2	0.0151958
chr1-241519174-241519812	6826	2	0.0247601
chr1-241639882-241640159	5184	0	0
chr1-24187051-24187987	4256	1	0.0172268
chr1-242056983-242057313	3475	23	0.535621
chr1-242057448-242057698	3953	37	0.720227
chr1-242523615-242525380	8349	11	0.100804
chr1-244054973-244055236	9027	119	0.963983
chr1-24413368-24413772	3471	0	0
chr1-244451151-244452299	12665	2	0.012675
chr1-244461200-244461618	8158	1	0.00731261
chr1-244652898-244653778	5178	0	0
chr1-244730140-244731064	10498	4	0.0320814
chr1-244834722-244835840	5407	0	0
chr1-244862883-244864718	24262	5	0.0140667
chr1-244970000-244971409	12011	1	0.00451045
chr1-245153246-245156945	22261	7	0.0208493
chr1-24535213-24535430	3258	0	0
chr1-245685238-245685801	13760	141	0.793277
chr1-245687876-245689212	45097	388	0.67916
chr1-24642537-24643705	14272	0	0
chr1-246506847-246507466	7440	1	0.0105703
chr1-246565906-246566974	4749	1	0.0175724
chr1-246723963-246724726	7624	0	0
chr1-246931184-246932365	12285	1	0.00450465
chr1-247007567-247008132	4656	2	0.0312149
chr1-247078278-247078899	5523	1	0.010828
chr1-247103878-247104582	9776	2	0.0125011
chr1-247111284-247112455	29216	27	0.0663531
chr1-247300547-247301408	15873	185	0.88429
chr1-247330948-247332538	26457	3	0.0069479
chr1-24744862-24746095	7973	1	0.0111366
chr1-247451394-247451642	4662	49	0.804554
chr1-2478354-2478610	4460	22	0.396357
chr1-247857029-247857950	18841	10	0.0389067
chr1-2479687-2479965	8286	72	0.689345
chr1-248811897-248812318	16597	157	0.743835
chr1-248847365-248848597	48564	588	0.941703
chr1-248858213-248859220	18452	4	0.0146704
chr1-24902006-24902641	12657	111	0.674519
chr1-24929037-24932514	16507	0	0
chr1-2502148-2502626	16728	107	0.471727
chr1-2504116-2504389	10770	84	0.600185
chr1-2508688-2509039	6803	81	0.876024
chr1-2513917-2514209	5158	62	0.882671
chr1-2518484-2518767	4438	51	0.864535
chr1-2519779-2520112	6989	74	0.801793
chr1-25232073-25232687	7364	0	0
chr1-25246476-25248030	24040	3	0.00734399
chr1-2525803-2526820	6930	0	0
chr1-2529322-2530571	29938	0	0
chr1-25430075-25431624	7688	0	0
chr1-25543403-25544551	6520	1	0.0121883
chr1-25617484-25618281	20248	45	0.157961
chr1-25858982-25859865	6060	4	0.0501396
chr1-2585959-2587453	23922	5	0.0146101
chr1-2595801-2596064	3096	14	0.363846
chr1-26035103-26036217	7582	1	0.00946413
chr1-26045791-26046822	5508	14	0.196025
chr1-2606233-2606447	4136	36	0.685214
chr1-26110829-26112426	12183	0	0
chr1-26161317-26162115	27578	39	0.111912
chr1-26164032-26164557	7867	5	0.0528056
chr1-26169689-26170333	12117	2	0.0116937
chr1-26279872-26280422	6321	0	0
chr1-26336048-26336975	14235	4	0.0190923
chr1-26345955-26346159	6159	37	0.434969
chr1-26411092-26411657	9960	12	0.0912203
chr1-26471876-26473351	7212	0	0
chr1-26529581-26530193	6879	0	0
chr1-26695343-26697530	37053	7	0.0120652
chr1-26826740-26827183	9081	1	0.00843858
chr1-26863422-26863637	5993	76	0.868939
chr1-26889671-26890554	14923	2	0.00856134
chr1-26900002-26900518	9643	0	0
chr1-26921558-26922128	7000	0	0
chr1-26993637-26994655	20653	4	0.0117129
chr1-27006103-27006491	13882	141	0.782193
chr1-27012389-27012950	11161	24	0.162449
chr1-27201394-27201594	4907	63	0.967821
chr1-27321963-27322515	10674	2	0.0119291
chr1-27349429-27351525	35509	323	0.701178
chr1-27356787-27357099	3819	39	0.686089
chr1-27360534-27361252	16078	46	0.227955
chr1-27365922-27366752	10187	1	0.00732179
chr1-27383111-27383341	4234	19	0.349989
chr1-27547907-27548127	5905	77	0.9217
chr1-27549882-27551036	28788	309	0.818623
chr1-27615355-27615813	9839	107	0.803679
chr1-27668217-27668520	9806	112	0.849246
chr1-27725635-27726491	5396	0	0
chr1-27830711-27831277	4260	1	0.0147081
chr1-27872521-27872746	5583	0	0
chr1-2789461-2790396	29432	105	0.283121
chr1-27914074-27915024	18056	1	0.00460869
chr1-27958510-27958793	5800	77	0.972572
chr1-27959509-27960327	10085	0	0
chr1-2800177-2800668	18714	134	0.543082
chr1-28232635-28233086	3843	1	0.0231901
chr1-28236000-28236465	7313	2	0.0230915
chr1-28259321-28260622	9439	0	0
chr1-28530526-28530799	4312	48	0.831471
chr1-28552891-28553192	6645	0	0
chr1-28592480-28592942	9519	11	0.0915868
chr1-28736555-28737803	10340	1	0.00540773
chr1-28811990-28812836	11189	6	0.039826
chr1-28862796-28863440	19915	207	0.830441
chr1-29121188-29125335	28544	31	0.0861564
chr1-29181465-29182174	9346	1	0.00937726
chr1-29230709-29231115	6814	0	0
chr1-29236234-29238795	4973	0	0
chr1-29259386-29260086	11949	5	0.0295287
chr1-29260576-29260900	7946	21	0.21736
chr1-3022070-3022479	10099	59	0.440048
chr1-3067362-3071398	5145	3	0.0418542
chr1-30718126-30719113	11451	1	0.00671956
chr1-30721430-30721740	5828	71	0.860901
chr1-30907998-30909119	4445	2	0.0387397
chr1-31065566-31066091	5037	0	0
chr1-31181576-31181986	7740	1	0.00785124
chr1-31239232-31239965	6310	3	0.0338268
chr1-31296400-31297131	5539	1	0.0146011
chr1-31412948-31414163	11193	6	0.039777
chr1-31586871-31587170	10615	89	0.666114
chr1-31644610-31645360	6484	2	0.0220795
chr1-31742886-31743103	5478	52	0.730272
chr1-3185977-3186788	9620	79	0.624689
chr1-31937682-31938781	3936	0	0
chr1-32013502-32014982	15719	1	0.00546152
chr1-32072605-32073451	6695	0	0
chr1-32204969-32206284	20229	35	0.140127
chr1-32221921-32222439	8900	2	0.016288
chr1-32275110-32275943	13324	133	0.770976
chr1-32291814-32292433	3793	0	0
chr1-32335259-32336628	6888	0	0
chr1-32361344-32362416	22537	56	0.197123
chr1-32394170-32394747	5143	0	0
chr1-32650943-32651762	7812	1	0.010121
chr1-32702419-32703264	4987	0	0
chr1-32741534-32742273	6532	1	0.00911658
chr1-32753827-32754379	4959	0	0
chr1-32817075-32818305	5248	0	0
chr1-32892869-32893848	9044	2	0.0165114
chr1-32901192-32901721	5846	1	0.0136496
chr1-32963931-32965015	19287	0	0
chr1-33036601-33037118	3507	1	0.0178864
chr1-33147376-33147720	8618	111	0.959443
chr1-33159659-33159926	8021	91	0.839493
chr1-33180726-33182272	18213	6	0.027688
chr1-33255848-33257064	7215	0	0
chr1-33276174-33276780	9442	94	0.774666
chr1-33306546-33307174	18038	113	0.503862
chr1-33625006-33625254	4855	30	0.474391
chr1-3404706-3405746	10741	84	0.613783
chr1-3411428-3412860	43872	346	0.598162
chr1-3414477-3414715	3853	19	0.385855
chr1-34163183-34165375	10043	11	0.0797896
chr1-3425449-3425762	4433	38	0.645338
chr1-3425975-3426242	4166	15	0.298455
chr1-34761428-34761675	8523	68	0.653729
chr1-3478138-3478627	5890	45	0.599548
chr1-34784818-34785135	8926	73	0.657092
chr1-34865684-34866808	12894	1	0.00682608
chr1-34868704-34868905	7836	74	0.72126
chr1-34885431-34886253	18560	21	0.0830256
chr1-34985049-34985436	8007	1	0.0111492
chr1-3509013-3509233	5103	39	0.583072
chr1-3509798-3510006	3552	33	0.663343
chr1-3510792-3511119	4018	24	0.430864
chr1-35191867-35192723	18855	2	0.00835573
chr1-35192873-35193210	6713	1	0.0122174
chr1-35268623-35269254	7965	0	0
chr1-3530886-3531495	7489	2	0.0199474
chr1-35573249-35574450	26496	213	0.619782
chr1-35641369-35641660	3271	1	0.027566
chr1-35769324-35770199	4878	0	0
chr1-35807899-35808860	7280	1	0.00795443
chr1-35930649-35931661	5915	6	0.0693811
chr1-36088725-36089354	9129	0	0
chr1-3611056-3611514	5722	0	0
chr1-36124855-36125520	3600	4	0.0928831
chr1-36149255-36149861	5372	1	0.0166258
chr1-36155851-36156709	9533	2	0.012928
chr1-36176156-36176860	20761	218	0.822599
chr1-36178355-36179042	21357	223	0.805886
chr1-3624204-3625677	22384	4	0.0127511
chr1-36306230-36307408	22283	2	0.00628952
chr1-36320900-36323801	37059	202	0.429479
chr1-36341762-36341983	4534	44	0.734887
chr1-36450196-36450723	3174	0	0
chr1-36463814-36464530	8185	1	0.009542
chr1-3649781-3653072	5817	0	0
chr1-3690533-3690989	4054	43	0.795123
chr1-37032777-37035023	7925	5	0.0480994
chr1-3732731-3733110	10402	96	0.707489
chr1-37514312-37514964	4998	0	0
chr1-37554006-37554222	10924	2	0.0110386
chr1-37556852-37557118	3947	29	0.511959
chr1-37691624-37692914	4915	1	0.0127475
chr1-37752519-37753223	15054	13	0.0632927
chr1-37753622-37754340	5772	7	0.0923699
chr1-37761408-37762069	20912	140	0.543117
chr1-37764167-37765216	4755	7	0.109485
chr1-37793424-37794755	20882	21	0.0735656
chr1-37807737-37808730	26476	3	0.00870718
chr1-3786901-3787344	10417	116	0.822437
chr1-37931565-37932049	19484	2	0.00583066
chr1-3795835-3796668	19084	1	0.00261195
chr1-37989561-37990097	4479	1	0.0188989
chr1-38012411-38013055	3375	0	0
chr1-38044431-38047970	77906	43	0.0402525
chr1-38708708-38709268	6418	65	0.789237
chr1-38859144-38860049	17453	2	0.00658166
chr1-38872808-38873677	11086	0	0
chr1-38990984-38991599	8289	0	0
chr1-3899793-3901520	5551	1	0.0147006
chr1-39104994-39106187	4817	1	0.0127794
chr1-39490753-39492465	43373	35	0.0612986
chr1-39514694-39516096	5230	3	0.0497811
chr1-39575646-39576995	9501	1	0.00738004
chr1-39639339-39640035	7115	2	0.0200307
chr1-39671551-39672415	7099	2	0.0176469
chr1-39683760-39684341	8053	23	0.213596
chr1-39738641-39739067	6909	0	0
chr1-39770096-39771518	5241	4	0.0617415
chr1-39788012-39789500	27095	62	0.182
chr1-39883270-39883616	4105	0	0
chr1-39900924-39902541	30701	8	0.0182508
chr1-39954816-39955694	5979	1	0.0135408
chr1-40096995-40097456	4982	0	0
chr1-40132837-40133537	8860	95	0.836809
chr1-40161242-40161940	7368	0	0
chr1-40258125-40258338	3714	0	0
chr1-40303515-40304199	22144	248	0.862246
chr1-40315333-40315773	4903	0	0
chr1-40316549-40317473	4877	1	0.0128094
chr1-40373713-40374350	3151	0	0
chr1-40691491-40692303	5214	1	0.0119947
chr1-40783419-40784489	12333	4	0.0210582
chr1-40818169-40818919	10051	0	0
chr1-40819182-40819477	3827	26	0.525816
chr1-40838060-40838764	8907	75	0.656432
chr1-40861278-40862613	19210	11	0.0451412
chr1-41017747-41018021	8272	92	0.872293
chr1-41361009-41362618	15701	8	0.033704
chr1-41381582-41383465	26677	15	0.0427014
chr1-41917970-41918332	3392	1	0.024387
chr1-42380308-42381317	11219	1	0.00785445
chr1-42456046-42456904	15394	0	0
chr1-42658307-42658751	4399	1	0.016408
chr1-42681830-42683345	5463	1	0.015036
chr1-42738445-42738652	3716	27	0.555701
chr1-42766544-42767688	32718	5	0.010536
chr1-42887115-42887323	3267	18	0.441937
chr1-42887571-42887771	5065	43	0.647609
chr1-42888277-42888499	4038	34	0.670098
chr1-42957797-42959097	7000	0	0
chr1-43147738-43148171	3686	5	0.10617
chr1-43171833-43172381	12254	0	0
chr1-43272814-43273158	9774	96	0.75721
chr1-43304852-43305209	15952	126	0.65091
chr1-43348635-43349606	11679	71	0.462063
chr1-43358464-43359388	7340	2	0.018938
chr1-43389705-43390250	8122	0	0
chr1-43453590-43454143	10797	0	0
chr1-43530759-43531829	10244	3	0.0192727
chr1-43591085-43591508	17039	171	0.793639
chr1-43597799-43598086	10727	83	0.600587
chr1-43605222-43605471	5114	43	0.642415
chr1-43936086-43936751	22919	27	0.090258
chr1-43969738-43970442	4379	2	0.0397098
chr1-43974471-43975584	17022	1	0.00296988
chr1-43978964-43979950	3416	0	0
chr1-43991479-43992100	19787	4	0.0144981
chr1-44103320-44103727	7968	57	0.565388
chr1-44631610-44632377	6967	2	0.0220246
chr1-44654566-44655051	9873	118	0.942023
chr1-44674099-44674912	6130	0	0
chr1-44724034-44724886	25819	284	0.863581
chr1-44739652-44740073	3980	0	0
chr1-44775342-44776228	8550	2	0.0151925
chr1-44784189-44784680	15608	3	0.0121026
chr1-44786291-44786620	6195	3	0.0411973
chr1-44799863-44801111	17176	11	0.0524679
chr1-44806008-44806646	23270	243	0.835208
chr1-44813094-44813956	23709	130	0.417363
chr1-45010554-45011350	17626	1	0.00366264
chr1-45205668-45206716	21342	3	0.0091091
chr1-45326748-45327629	19651	4	0.0161903
chr1-45339893-45340311	5422	0	0
chr1-45583919-45584910	4639	1	0.0179816
chr1-45622523-45623470	27482	330	0.934691
chr1-46132455-46133457	6264	0	0
chr1-46203150-46203586	5222	0	0
chr1-46301754-46303364	16220	3	0.0138194
chr1-46340668-46341164	4910	0	0
chr1-46394053-46394619	6625	16	0.197078
chr1-46532961-46533577	14937	4	0.0170312
chr1-4653930-4656495	7174	4	0.0439271
chr1-46612909-46613295	11935	163	0.955295
chr1-46668003-46668723	11169	2	0.0144834
chr1-47023555-47023961	4804	7	0.114274
chr1-4711593-4712485	21873	167	0.572156
chr1-47225309-47226055	15860	7	0.032858
chr1-47230833-47232525	7278	4	0.0364343
chr1-47333740-47334754	8752	0	0
chr1-47416225-47417393	35901	55	0.117648
chr1-47437122-47439846	57795	68	0.0898505
chr1-4772292-4772493	3507	30	0.645382
chr1-47994141-47994389	6293	44	0.575284
chr1-47996460-47997929	6068	5	0.0672403
chr1-48471633-48472399	5402	3	0.0430679
chr1-48776520-48777138	8256	3	0.0288725
chr1-50047973-50048648	6465	7	0.0820686
chr1-50418557-50425799	55993	90	0.124381
chr1-50959776-50960398	3379	0	0
chr1-51236096-51236870	3972	0	0
chr1-51344656-51345015	3782	5	0.0886414
chr1-51616903-51617376	3090	0	0
chr1-51729357-51730149	4567	0	0
chr1-51878507-51879267	4831	0	0
chr1-52032781-52033833	26744	5	0.0121408
chr1-52368468-52368856	7082	7	0.0769316
chr1-52602209-52602936	5337	0	0
chr1-52632958-52633631	12168	3	0.0161215
chr1-52698017-52698508	5138	1	0.0170931
chr1-52726352-52726756	7584	0	0
chr1-52842623-52843505	7363	9	0.0949923
chr1-52920953-52921851	7372	2	0.0187656
chr1-52927209-52927973	5832	0	0
chr1-53061993-53063302	7037	2	0.0230001
chr1-53078433-53079011	12254	120	0.76891
chr1-53196638-53197143	6061	1	0.00983129
chr1-53220225-53220719	12498	0	0
chr1-53238288-53238887	3020	0	0
chr1-53276626-53277173	20654	224	0.806014
chr1-53326016-53328156	16547	0	0
chr1-53459519-53460555	19113	152	0.612646
chr1-53737730-53739637	9675	12	0.0907285
chr1-53838086-53838589	6319	0	0
chr1-54052929-54053626	4965	0	0
chr1-54200149-54200586	11998	0	0
chr1-54405181-54407327	12306	3	0.015693
chr1-54715673-54716180	4900	1	0.0128016
chr1-54781070-54781846	21613	222	0.834632
chr1-54800605-54801385	20898	51	0.191458
chr1-54805993-54806299	5969	58	0.719656
chr1-54886791-54887655	9646	2	0.016574
chr1-54980415-54981173	5160	13	0.218569
chr1-55039388-55040342	7708	5	0.0524457
chr1-55214793-55216035	10521	0	0
chr1-56578430-56579444	6457	0	0
chr1-56644991-56645564	6925	2	0.0184725
chr1-58576086-58577623	36876	101	0.209808
chr1-5877098-5877332	5012	63	0.837773
chr1-58781790-58785268	25417	2	0.0053865
chr1-59814416-59815376	4667	1	0.0177131
chr1-59926601-59926911	4600	2	0.0282484
chr1-6051550-6051776	5066	61	0.863438
chr1-6127684-6128175	3988	33	0.581422
chr1-6128814-6129060	5905	68	0.872429
chr1-6142059-6142299	5450	62	0.904766
chr1-6148657-6148979	4718	2	0.0287771
chr1-61654203-61654421	4192	48	0.859721
chr1-61724976-61725270	8028	1	0.00744727
chr1-6179178-6180754	5474	3	0.0420911
chr1-6199119-6199823	4625	0	0
chr1-6205766-6206718	18790	10	0.0404718
chr1-6208761-6209528	19919	5	0.0179219
chr1-6235469-6236201	8866	0	0
chr1-6245089-6246403	16083	9	0.0414835
chr1-6249104-6250032	24194	32	0.101729
chr1-6253702-6254079	10310	87	0.682739
chr1-62687710-62688678	4681	0	0
chr1-6281077-6281352	4058	47	0.802288
chr1-63316724-63324800	54344	115	0.16171
chr1-63593267-63594242	8387	1	0.0104221
chr1-63773795-63775108	5233	2	0.0271157
chr1-6392960-6394125	8604	1	0.00681391
chr1-6418998-6420878	26385	42	0.124334
chr1-6424444-6425267	10562	9	0.0626616
chr1-6440109-6441070	17048	23	0.109537
chr1-64469872-64470931	4294	1	0.0194381
chr1-6447148-6449126	27670	14	0.037688
chr1-6451630-6452050	9445	70	0.570489
chr1-6454049-6455985	41798	51	0.0970108
chr1-6460525-6461895	15349	171	0.875668
chr1-6470613-6470818	5818	59	0.774439
chr1-6471412-6471676	5930	58	0.790436
chr1-64744600-64745555	6461	0	0
chr1-6485084-6485858	5665	0	0
chr1-6497091-6497812	4216	1	0.019776
chr1-65066588-65068282	9249	2	0.0144042
chr1-65147359-65149215	4581	1	0.0195064
chr1-65309334-65310063	5892	5	0.0618926
chr1-65420174-65421021	6128	0	0
chr1-6554077-6554775	19468	3	0.0104531
chr1-6579368-6580301	3847	24	0.461216
chr1-6593338-6593614	7180	93	0.910751
chr1-6599066-6599445	8151	77	0.747384
chr1-6601717-6603784	36522	1	0.00123008
chr1-6612727-6615681	6501	4	0.0434827
chr1-6625012-6625780	5497	0	0
chr1-66930001-66930800	5773	0	0
chr1-6701236-6702071	6071	2	0.0245739
chr1-67053863-67054456	4686	1	0.013331
chr1-67429453-67431143	8512	0	0
chr1-67685231-67686587	17808	2	0.00878793
chr1-6784254-6786306	9621	1	0.00775548
chr1-68046961-68047322	5936	33	0.435349
chr1-68496601-68497323	5700	1	0.0145898
chr1-69567285-69568812	6951	20	0.203973
chr1-69919361-69919587	4280	44	0.760039
chr1-70354051-70355036	12667	1	0.0040724
chr1-71046542-71048121	27247	76	0.21967
chr1-74198143-74198351	4985	0	0
chr1-75136314-75137124	7058	19	0.206632
chr1-75615694-75616680	4780	0	0
chr1-75724232-75725045	6339	0	0
chr1-75796852-75797218	3863	33	0.66497
chr1-7663341-7665115	38222	249	0.489914
chr1-76867427-76868849	13185	9	0.0481904
chr1-77281689-77282539	4290	1	0.0145682
chr1-77682533-77683733	3433	0	0
chr1-7770992-7771786	5404	1	0.0150882
chr1-7783401-7785044	5597	61	0.792451
chr1-78045894-78046477	10612	3	0.0237376
chr1-7827139-7827416	9304	82	0.657003
chr1-79006597-79006852	6065	33	0.434925
chr1-8317725-8318275	5673	4	0.0561755
chr1-8324328-8324659	7882	61	0.58925
chr1-8325836-8326108	5525	54	0.694915
chr1-8330143-8330740	14824	130	0.698107
chr1-8335284-8335575	5588	49	0.74701
chr1-8343638-8344042	5960	52	0.680611
chr1-8358263-8358490	6243	58	0.715336
chr1-84077464-84078578	12159	3	0.0158698
chr1-84298426-84299223	3817	0	0
chr1-84479250-84479667	5328	0	0
chr1-84505662-84506808	5425	0	0
chr1-84574143-84574661	5953	1	0.0103866
chr1-85047827-85048872	5091	2	0.0251583
chr1-85200136-85201967	48320	2	0.0017859
chr1-85259019-85259841	9522	0	0
chr1-85276183-85276852	6709	1	0.0122322
chr1-85464258-85465485	19118	8	0.0298076
chr1-85576547-85577252	3036	1	0.0208957
chr1-85580680-85581557	12747	11	0.0691324
chr1-86552986-86553493	4406	32	0.575649
chr1-86704193-86705332	3644	1	0.0173969
chr1-86914480-86915531	4116	0	0
chr1-87331700-87332201	5017	3	0.0517973
chr1-88683933-88685035	6677	1	0.0108661
chr1-88891281-88891708	4054	0	0
chr1-89843281-89844047	3116	0	0
chr1-89994841-89995678	5996	0	0
chr1-9039222-9040454	17110	190	0.867612
chr1-90716541-90718983	17016	35	0.161392
chr1-9128445-9129417	15153	5	0.0241179
chr1-92029811-92030407	6163	5	0.0588429
chr1-92080263-92080923	4209	1	0.0150475
chr1-92298617-92299369	6227	0	0
chr1-923591-926252	43891	10	0.0142958
chr1-92480310-92487052	35941	288	0.638569
chr1-9264144-9264380	6629	71	0.829582
chr1-9264629-9264957	6360	64	0.758536
chr1-92831942-92832565	5106	0	0
chr1-92960956-92962197	4902	0	0
chr1-93180116-93180914	20024	2	0.00579194
chr1-93345662-93346383	4231	1	0.0148072
chr1-93447913-93448967	7974	5	0.0505846
chr1-935578-935956	3209	11	0.26145
chr1-9356068-9356345	10537	94	0.707298
chr1-9367449-9367675	4594	48	0.831306
chr1-93878952-93879266	3220	1	0.0262598
chr1-93908814-93909911	7079	0	0
chr1-940226-942983	31832	26	0.05682
chr1-94237135-94237788	7414	1	0.00806819
chr1-94247351-94247961	4333	1	0.0168927
chr1-94417970-94418846	7285	0	0
chr1-94541282-94542083	7816	4	0.0381866
chr1-94820047-94820763	8953	4	0.0287978
chr1-94926282-94927560	19378	16	0.0574428
chr1-95072696-95072995	3775	0	0
chr1-950977-951222	4001	69	1
chr1-95234121-95234586	6024	0	0
chr1-9539292-9540385	6395	0	0
chr1-9588675-9589459	7116	0	0
chr1-958934-967274	102400	642	0.494372
chr1-9610560-9610810	6831	59	0.654601
chr1-96721547-96722263	7838	1	0.0104948
chr1-970917-971158	6771	23	0.253957
chr1-9715651-9715939	7961	89	0.853934
chr1-9730235-9730646	5286	46	0.673484
chr1-9731101-9731428	4525	60	0.919329
chr1-976047-979425	21358	142	0.490644
chr1-97920634-97921168	5499	0	0
chr1-9822954-9824609	3899	0	0
chr1-98661317-98662155	8490	1	0.0093242
chr1-99004377-99005028	10213	16	0.11457
chr1-99264427-99264779	6955	3	0.0328777
chr1-998008-1002030	35056	7	0.0133742
chr1-9997210-9998050	3569	8	0.166267
chr10-100065205-100065429	3661	37	0.756238
chr10-100229371-100229776	5275	0	0
chr10-100267343-100267733	3692	0	0
chr10-100286386-100286875	7514	0	0
chr10-100346426-100347965	5576	0	0
chr10-100482224-100482802	15503	5	0.0220185
chr10-100529394-100529985	7834	1	0.00753481
chr10-100535792-100536153	6518	0	0
chr10-100735360-100735856	5882	2	0.0228101
chr10-100744157-100746389	6770	5	0.0501814
chr10-100747726-100749889	6775	2	0.0193283
chr10-100826369-100829867	11466	0	0
chr10-100912611-100913402	9863	1	0.00780432
chr10-100986777-100987744	23172	52	0.169247
chr10-100989114-100989331	3848	37	0.728997
chr10-100996950-101000041	4936	0	0
chr10-101005449-101005691	6097	79	0.905815
chr10-101006565-101006936	11719	129	0.847149
chr10-101018848-101019165	14026	39	0.211731
chr10-101030021-101030237	6275	30	0.376163
chr10-101032286-101032509	3536	0	0
chr10-101060732-101063117	15680	8	0.0415102
chr10-101131254-101132274	21593	17	0.0622111
chr10-101133904-101135302	10306	15	0.11612
chr10-101136586-101136908	7184	18	0.197089
chr10-101222546-101230435	27467	71	0.205342
chr10-101353767-101354657	14558	2	0.00815445
chr10-101587923-101588458	3077	0	0
chr10-101694223-101695357	12885	1	0.00540725
chr10-101775639-101776748	6571	8	0.0919249
chr10-101782955-101783533	5517	0	0
chr10-101817638-101818499	7620	2	0.0162791
chr10-101843410-101843669	5832	37	0.497915
chr10-102065138-102066021	21651	1	0.00211845
chr10-102119877-102120360	6375	2	0.0222561
chr10-102132903-102133833	8338	0	0
chr10-102151940-102152789	4620	1	0.0179867
chr10-102230457-102232072	36203	13	0.0273914
chr10-102393973-102395800	9909	1	0.00539353
chr10-102399340-102399779	14164	1	0.00480354
chr10-102410412-102411115	5297	9	0.12886
chr10-102420722-102422285	36088	3	0.00493209
chr10-102450339-102451228	18038	3	0.0133006
chr10-102502468-102502767	3513	1	0.0204351
chr10-102503920-102504398	6852	1	0.00876386
chr10-102642065-102645211	15627	1	0.00445398
chr10-102656799-102657408	14507	158	0.848141
chr10-102713643-102714954	9127	1	0.00635927
chr10-102854244-102854569	3133	0	0
chr10-102869282-102869722	11631	14	0.0976614
chr10-102917559-102919555	46105	42	0.0678642
chr10-103276872-103278327	31967	45	0.109415
chr10-103350509-103351251	12524	1	0.00433555
chr10-103367824-103368706	25879	2	0.00416865
chr10-103455296-103455703	9396	92	0.741066
chr10-103458210-103458530	8610	79	0.720267
chr10-103473165-103473699	11644	122	0.83832
chr10-103493435-103494671	5554	1	0.0112045
chr10-103555251-103555487	4016	7	0.130331
chr10-103584417-103585282	24727	161	0.511435
chr10-103602028-103602431	11475	138	0.880147
chr10-103602793-103603070	6538	84	0.958601
chr10-103660928-103661198	3426	31	0.619418
chr10-103692581-103693472	4719	2	0.0361803
chr10-103854754-103855736	5542	4	0.0551501
chr10-104121692-104122189	4739	0	0
chr10-104232142-104232490	7251	0	0
chr10-104254774-104255329	12780	3	0.0148552
chr10-104274817-104275045	4835	0	0
chr10-104315208-104315610	9076	100	0.804505
chr10-104315802-104316033	5263	53	0.794087
chr10-104639810-104643054	24768	37	0.110931
chr10-1048398-1049654	10605	0	0
chr10-107164023-107165047	18290	40	0.160958
chr10-109923018-109923725	7281	0	0
chr10-11017480-11018794	5476	0	0
chr10-110207671-110210965	7878	1	0.00891216
chr10-110225806-110227456	5108	1	0.0158424
chr10-110497406-110498926	21489	1	0.00262542
chr10-110567315-110568430	5002	1	0.0123319
chr10-110643196-110644570	7912	4	0.0325838
chr10-111076233-111079545	54509	382	0.550917
chr10-112446847-112447562	4171	0	0
chr10-112951120-112951608	8983	1	0.00644378
chr10-113165764-113165992	4591	31	0.517974
chr10-113679249-113680437	11139	1	0.00654027
chr10-113854615-113855297	7023	0	0
chr10-114043325-114045709	54216	207	0.301395
chr10-114285996-114286353	10059	104	0.751709
chr10-114403633-114404840	10285	8	0.0580914
chr10-11463224-11463767	12840	163	0.936245
chr10-114767766-114768715	5399	1	0.0110842
chr10-114821573-114822675	3539	0	0
chr10-114938135-114938617	6161	0	0
chr10-115092503-115094335	20906	3	0.00837977
chr10-11610836-11611963	12731	2	0.011457
chr10-116125303-116125518	4489	41	0.6687
chr10-116271068-116274718	6278	8	0.0919147
chr10-116627507-116627965	4051	8	0.164229
chr10-116741358-116743195	7553	2	0.019709
chr10-116849089-116849667	3773	1	0.0222808
chr10-117004718-117005635	4138	1	0.0201412
chr10-117134017-117134921	16420	30	0.142866
chr10-117136453-117138526	12048	62	0.401681
chr10-117240925-117242019	4307	2	0.0301217
chr10-117374293-117376121	29959	4	0.00906422
chr10-11742016-11742938	7664	2	0.0220331
chr10-117541811-117545857	23586	34	0.114517
chr10-1184874-1185274	7094	36	0.415507
chr10-118594181-118596309	36378	213	0.451703
chr10-11869556-11870433	33862	289	0.66426
chr10-118754517-118755596	10831	1	0.00504937
chr10-119029278-119030869	34936	3	0.0045631
chr10-119042150-119042714	16130	184	0.850623
chr10-119080081-119080968	5152	0	0
chr10-119103899-119104892	7334	1	0.0108553
chr10-119165274-119166046	5885	0	0
chr10-119178517-119178906	6139	0	0
chr10-119207871-119208111	4322	0	0
chr10-119541967-119543657	8182	0	0
chr10-119596302-119597446	22355	2	0.00575767
chr10-119651055-119652315	10279	3	0.0228528
chr10-119725552-119726619	6834	1	0.0114638
chr10-119818018-119818873	3232	45	0.987506
chr10-119872143-119873592	4922	1	0.0125049
chr10-119892492-119892995	4913	1	0.0172339
chr10-120456748-120457865	5553	4	0.0506802
chr10-12068702-12069300	6589	0	0
chr10-120851167-120851540	4007	0	0
chr10-12129227-12130039	7261	1	0.0109336
chr10-121597103-121598771	4170	1	0.019813
chr10-121927458-121928594	12493	1	0.00586495
chr10-12195834-12196378	3825	0	0
chr10-121974513-121975062	10004	0	0
chr10-122163336-122164027	4198	1	0.0200026
chr10-122460823-122462724	14625	22	0.114573
chr10-122643143-122643448	5919	34	0.45753
chr10-122818611-122818927	9597	56	0.475042
chr10-122879228-122880277	4816	0	0
chr10-122953753-122954733	6468	1	0.00916315
chr10-122980277-122980776	9280	0	0
chr10-123008243-123009381	5926	3	0.0354095
chr10-123134560-123137850	42514	46	0.0854842
chr10-123147768-123151519	30396	48	0.124862
chr10-123154116-123155210	5694	0	0
chr10-12348804-12350590	7707	1	0.0101314
chr10-123666015-123667126	24497	192	0.636564
chr10-123891305-123891937	9275	20	0.174778
chr10-123991897-123992468	12711	64	0.379611
chr10-124044486-124044863	7181	75	0.839919
chr10-1242089-1242359	4556	43	0.703986
chr10-124447241-124450327	30602	17	0.0421235
chr10-124461675-124462171	6338	0	0
chr10-124791524-124792241	7624	0	0
chr10-124801593-124802365	5522	2	0.0259312
chr10-124916552-124917643	3928	0	0
chr10-124997983-124998323	5156	40	0.614445
chr10-125026535-125026807	7662	75	0.740395
chr10-125027160-125027360	4407	25	0.399313
chr10-125158656-125162758	4489	0	0
chr10-125719059-125719997	5141	3	0.0454581
chr10-125773662-125774418	21437	161	0.584017
chr10-125775588-125775816	3835	25	0.516865
chr10-125895681-125896969	6160	112	0.9332
chr10-126387587-126388913	7444	11	0.11547
chr10-126504743-126504962	5078	34	0.51578
chr10-126905041-126906479	3450	4	0.0875293
chr10-127175327-127175800	9880	71	0.529017
chr10-127736147-127739102	31978	151	0.36498
chr10-127907125-127907973	4431	3	0.0442757
chr10-129466685-129467446	7802	0	0
chr10-129840301-129840576	3932	44	0.825311
chr10-129867753-129868051	3737	35	0.69104
chr10-129958427-129960523	6617	7	0.0853431
chr10-129962906-129973432	19425	22	0.0863549
chr10-13001095-13001781	10770	12	0.0805399
chr10-130110468-130111622	5989	1	0.0102612
chr10-131260076-131260346	3548	40	0.877679
chr10-131310931-131312789	13384	7	0.0357825
chr10-131900493-131901844	7624	0	0
chr10-131937896-131938130	4449	62	0.985205
chr10-131981395-131983094	9794	0	0
chr10-132117092-132117694	9257	91	0.784348
chr10-132140342-132140775	8333	67	0.604735
chr10-132185409-132187996	4758	17	0.274074
chr10-132202540-132202840	4800	43	0.678259
chr10-132226695-132226914	3393	22	0.505323
chr10-132227996-132228280	4841	42	0.69524
chr10-132306944-132308918	7521	2	0.0183601
chr10-132331674-132332521	4219	0	0
chr10-132395864-132397560	8710	0	0
chr10-132404765-132406111	50639	539	0.82803
chr10-132536799-132538191	5842	0	0
chr10-132749063-132749702	4091	49	0.868159
chr10-132783854-132789145	38835	110	0.216864
chr10-132869197-132869413	3886	30	0.606411
chr10-132879348-132879748	7788	26	0.260947
chr10-132919098-132920273	7065	59	0.649003
chr10-132922469-132922750	6821	65	0.713488
chr10-132924715-132925200	5961	64	0.836247
chr10-132942160-132943348	8903	6	0.0515598
chr10-13299378-13300223	6180	1	0.00978514
chr10-133070923-133071142	5320	28	0.387081
chr10-133087695-133089115	5322	13	0.185708
chr10-133098473-133098979	4827	35	0.533028
chr10-133105252-133105471	6808	57	0.647311
chr10-133126831-133127371	5029	50	0.768453
chr10-133128422-133129497	35449	367	0.826491
chr10-133160027-133160807	7355	2	0.0178118
chr10-133166799-133167555	6316	53	0.675993
chr10-133182815-133183497	4692	48	0.767668
chr10-133186017-133186327	9034	70	0.557598
chr10-133201200-133201898	12611	91	0.552462
chr10-133207115-133207428	7109	73	0.786484
chr10-133219827-133220841	4134	20	0.369681
chr10-133224582-133225002	4277	32	0.592696
chr10-133229718-133231488	44527	76	0.129838
chr10-133235294-133238573	6899	35	0.373256
chr10-133276466-133276987	4868	0	0
chr10-133285039-133285726	7599	92	0.947053
chr10-133288162-133288480	4468	52	0.904686
chr10-133308488-133309605	11745	26	0.169789
chr10-133309735-133309944	3803	60	0.920327
chr10-133325179-133326213	12651	5	0.0257257
chr10-133357142-133358450	8623	0	0
chr10-133372839-133373677	6591	0	0
chr10-133378091-133379803	7729	1	0.0102341
chr10-133389598-133389812	4502	0	0
chr10-133393964-133394569	8647	0	0
chr10-133423184-133425243	20243	56	0.209983
chr10-133457280-133457557	5885	45	0.568235
chr10-133458367-133458640	12140	103	0.660161
chr10-133459497-133460181	34093	267	0.619328
chr10-133465213-133465612	14500	73	0.405688
chr10-133527752-133529057	6747	9	0.103301
chr10-133565380-133566263	4723	39	0.618949
chr10-133568031-133570014	17170	159	0.719006
chr10-13528129-13529395	5799	4	0.051017
chr10-13586790-13587266	3547	0	0
chr10-1362465-1364024	40754	372	0.725023
chr10-13656563-13657540	33178	346	0.818965
chr10-14837771-14839042	11006	1	0.00683589
chr10-14878322-14879689	6783	1	0.00891805
chr10-14953682-14954432	5160	0	0
chr10-15088388-15088914	7502	0	0
chr10-15167826-15168715	7988	1	0.00970085
chr10-15213056-15213288	5789	50	0.659706
chr10-15370421-15371463	9266	0	0
chr10-15719425-15720102	9995	3	0.0200025
chr10-15860081-15860403	3599	1	0.0235426
chr10-16519606-16521720	21200	6	0.0196626
chr10-17201306-17201788	4605	0	0
chr10-17228432-17230618	21139	2	0.00539724
chr10-1736591-1737824	5279	4	0.0566442
chr10-17453409-17454722	22858	15	0.0485032
chr10-17616667-17617640	15527	1	0.00451077
chr10-18140197-18141291	8513	4	0.0347487
chr10-18659185-18659782	4008	0	0
chr10-19815523-19817176	4481	4	0.0594733
chr10-21173200-21174879	7404	1	0.0107127
chr10-21494270-21497491	14132	0	0
chr10-21516269-21517701	36251	3	0.00389412
chr10-21533922-21535481	6813	2	0.0217597
chr10-22003046-22003968	8330	0	0
chr10-22315979-22316703	4930	1	0.0167657
chr10-22345072-22345933	10134	30	0.229209
chr10-22713227-22714398	4747	1	0.0132032
chr10-23095633-23096149	3507	1	0.0176944
chr10-23191769-23193526	28347	37	0.103987
chr10-23438908-23440594	41556	4	0.0052023
chr10-24952182-24952852	5239	2	0.0256885
chr10-2501272-2501929	5757	62	0.823546
chr10-25174498-25176710	25445	92	0.279075
chr10-26211679-26212197	7369	8	0.0827553
chr10-26215455-26218505	14874	21	0.113765
chr10-26566978-26567353	14131	123	0.670647
chr10-26697214-26698159	4878	0	0
chr10-26860238-26861300	3291	0	0
chr10-27100147-27100693	5654	0	0
chr10-27155205-27155565	7399	1	0.00830348
chr10-27240290-27241173	12109	0	0
chr10-27242010-27242434	3549	0	0
chr10-27252369-27252837	7583	11	0.106244
chr10-27413440-27414189	20457	175	0.672881
chr10-27504121-27504835	7138	0	0
chr10-27741254-27746282	16235	26	0.124683
chr10-28532261-28534163	16578	1	0.0029022
chr10-28676776-28678337	5127	1	0.0119901
chr10-29409434-29410115	4398	0	0
chr10-30349033-30349350	3331	0	0
chr10-3066459-3069227	50614	3	0.00215875
chr10-3103728-3104014	5017	44	0.684431
chr10-3118697-3118915	4427	68	1
chr10-31318299-31321165	5402	0	0
chr10-3137983-3138386	5167	50	0.755167
chr10-3172107-3173068	8329	2	0.0165768
chr10-32055623-32056642	4764	1	0.0151321
chr10-32109909-32110168	4186	35	0.690531
chr10-32346290-32347727	6666	2	0.0214293
chr10-326993-327219	3635	38	0.812316
chr10-33334193-33337269	37277	50	0.105802
chr10-34814197-34816315	6557	2	0.0234238
chr10-349231-349464	3331	23	0.530495
chr10-35336122-35337612	8186	1	0.00988166
chr10-35607591-35608324	23378	40	0.133932
chr10-35639383-35642965	49707	80	0.125389
chr10-363262-363583	3356	24	0.564602
chr10-3781598-3781825	4998	48	0.748518
chr10-3784662-3785934	5526	0	0
chr10-37857575-37858176	3502	1	0.0238278
chr10-38010563-38011171	6615	1	0.0120818
chr10-38729964-38730957	3778	41	0.761039
chr10-413753-414118	4538	32	0.527443
chr10-42149374-42150964	3618	32	0.655344
chr10-42638076-42638702	5894	1	0.0103952
chr10-42753076-42755464	12275	18	0.1114
chr10-43076557-43077986	5569	4	0.0545819
chr10-43104791-43105717	12360	7	0.0412044
chr10-43229081-43230165	5763	3	0.0453578
chr10-44293364-44293672	12283	32	0.196828
chr10-44384267-44386943	7910	1	0.00764323
chr10-45000828-45001338	3281	0	0
chr10-45373271-45374708	7871	0	0
chr10-45443179-45444231	26497	270	0.778238
chr10-45700004-45700226	3173	20	0.508685
chr10-45726969-45727839	8365	0	0
chr10-45971896-45972794	7398	0	0
chr10-46106178-46106858	6164	3	0.0394016
chr10-46284442-46285143	26651	3	0.00655998
chr10-46911236-46911769	5187	27	0.406571
chr10-47300042-47300950	8569	26	0.23897
chr10-47309892-47310694	25967	191	0.566708
chr10-47325394-47325620	5880	41	0.563493
chr10-47349987-47350342	10153	108	0.826443
chr10-47368498-47368756	6890	43	0.481942
chr10-47384165-47384902	5741	1	0.0140544
chr10-47564946-47566050	3747	33	0.672271
chr10-4825934-4826605	7397	15	0.161181
chr10-48450182-48451158	33091	336	0.769417
chr10-484774-485159	3410	32	0.70003
chr10-48479619-48479827	4994	51	0.788633
chr10-48523405-48524593	5533	1	0.0144354
chr10-48587-49361	10947	65	0.463358
chr10-49115140-49115690	5560	4	0.0621081
chr10-49131846-49132133	6521	52	0.607279
chr10-49326230-49326659	14165	117	0.635726
chr10-49394944-49398737	3760	6	0.121533
chr10-49609556-49612310	47240	208	0.34541
chr10-49614305-49614620	6720	1	0.00890001
chr10-49679520-49679816	4396	12	0.212644
chr10-49941467-49942365	8063	1	0.00974887
chr10-50067657-50068527	9975	0	0
chr10-50991197-50992005	10298	6	0.0433959
chr10-51073780-51074992	9950	1	0.00760727
chr10-52314230-52315067	10757	4	0.0285371
chr10-5412469-5413056	3667	0	0
chr10-5498823-5499552	16530	150	0.717116
chr10-5525160-5525865	16199	145	0.691214
chr10-5641686-5641915	4611	58	0.927886
chr10-5666018-5666835	6040	0	0
chr10-5684493-5685734	8052	0	0
chr10-5812744-5814002	5685	1	0.0145009
chr10-58267248-58269481	13671	3	0.0166424
chr10-58334972-58335546	4321	1	0.0193909
chr10-58512741-58513696	10213	0	0
chr10-5888952-5890674	20771	3	0.00856101
chr10-59176068-59177289	4535	17	0.283049
chr10-5976982-5978171	14725	0	0
chr10-59905899-59907036	11158	1	0.00511948
chr10-60733028-60733618	5546	1	0.0145832
chr10-60943550-60944532	12796	2	0.010053
chr10-6144558-6145892	8068	1	0.00746268
chr10-61452738-61453251	4688	0	0
chr10-61662781-61663347	3364	6	0.123458
chr10-6201013-6204494	7775	0	0
chr10-6220685-6220908	5834	39	0.512591
chr10-62268283-62268947	6159	1	0.014577
chr10-62804676-62806058	28691	8	0.0190389
chr10-62813412-62813640	7882	104	0.905711
chr10-62814901-62818923	10367	8	0.0621883
chr10-63133338-63133576	3378	0	0
chr10-63465111-63466127	11733	0	0
chr10-63521111-63522270	5478	0	0
chr10-65053878-65054303	9619	65	0.52405
chr10-67884412-67885420	17576	2	0.00891826
chr10-68231137-68231766	16832	7	0.0268718
chr10-68406450-68407585	9121	1	0.00851688
chr10-68471640-68472040	5706	0	0
chr10-68527204-68527639	5334	0	0
chr10-68827161-68828452	5889	2	0.0238394
chr10-688768-690282	6229	9	0.115854
chr10-68900770-68901717	4100	0	0
chr10-68956183-68956738	3963	1	0.0158906
chr10-68988680-68989578	15354	2	0.0097939
chr10-69123908-69124597	7138	0	0
chr10-69180141-69180548	8165	0	0
chr10-69248517-69248722	4997	50	0.758271
chr10-69318191-69319621	7017	1	0.00854494
chr10-69408650-69409196	4049	0	0
chr10-69451361-69452024	4853	1	0.0128312
chr10-69572171-69573636	24415	20	0.0620558
chr10-69801547-69803120	9059	2	0.0162976
chr10-70145460-70146919	46231	5	0.00618336
chr10-70232659-70233711	6886	0	0
chr10-70255022-70255940	26142	93	0.272846
chr10-70283691-70284130	4643	17	0.274953
chr10-70404301-70404817	9720	2	0.0137013
chr10-70440310-70441612	6261	7	0.0986405
chr10-70600500-70600825	7991	89	0.827024
chr10-70672487-70672982	5704	10	0.137262
chr10-70887895-70888573	3170	0	0
chr10-71212319-71214138	5880	1	0.0136199
chr10-71396408-71398174	3869	0	0
chr10-7171881-7172141	11462	123	0.812115
chr10-71773335-71773735	5934	0	0
chr10-71850905-71851390	4608	0	0
chr10-72007399-72008621	36215	384	0.837214
chr10-72087049-72088475	10426	1	0.00743574
chr10-72273410-72274940	14756	4	0.0206374
chr10-72354058-72355034	8725	1	0.00684881
chr10-72692071-72692839	6189	1	0.00964751
chr10-73246872-73247426	13427	0	0
chr10-73252369-73252773	6554	0	0
chr10-73647656-73647948	8178	14	0.139074
chr10-7367597-7367822	4255	39	0.674388
chr10-73732736-73733664	32304	354	0.848632
chr10-73772213-73773059	32247	2	0.00248347
chr10-73781800-73782448	7707	1	0.010419
chr10-73785507-73786151	7510	0	0
chr10-73839503-73839730	4650	46	0.771283
chr10-73874029-73875038	6943	0	0
chr10-73910939-73911621	3060	2	0.0567513
chr10-73997727-73998469	7872	2	0.0161608
chr10-74151079-74151722	3925	1	0.0163296
chr10-74176460-74177230	6868	0	0
chr10-75043783-75044099	10020	36	0.278925
chr10-75111298-75111862	3984	1	0.0155657
chr10-75210235-75211244	4571	0	0
chr10-75234135-75236195	37468	5	0.00738222
chr10-75395371-75409842	75317	391	0.402001
chr10-75431304-75431813	6924	5	0.0606151
chr10-7576415-7576652	4377	29	0.49189
chr10-7579756-7579987	5540	47	0.653794
chr10-7666707-7667140	5872	3	0.0352284
chr10-77636338-77638737	35196	49	0.109919
chr10-7787626-7788554	9770	1	0.00779577
chr10-77925962-77927292	16153	5	0.0211448
chr10-78033737-78034194	4816	0	0
chr10-7818299-7819144	12378	0	0
chr10-79347327-79348191	10805	0	0
chr10-79386203-79386441	9425	75	0.628172
chr10-79444697-79446055	10011	3	0.0202862
chr10-79981473-79982537	9305	0	0
chr10-80078604-80079322	7256	1	0.00834945
chr10-8009105-8009378	10234	110	0.84125
chr10-80132467-80132908	3544	3	0.0601441
chr10-80408309-80409161	3556	0	0
chr10-8049412-8056366	8315	16	0.151558
chr10-8058422-8058805	15068	158	0.780462
chr10-81874294-81875973	20576	35	0.127642
chr10-84194444-84195547	11860	18	0.120288
chr10-84237354-84237671	10415	50	0.381644
chr10-8513696-8514139	8624	72	0.672996
chr10-86363168-86367607	10402	5	0.0321331
chr10-86942559-86943565	35034	375	0.846854
chr10-86968283-86968963	4343	5	0.0846556
chr10-87094001-87095741	21390	2	0.00518118
chr10-87341959-87343261	7799	0	0
chr10-87504614-87505614	21498	0	0
chr10-87659590-87660270	9868	2	0.0144588
chr10-87862016-87862839	14358	1	0.00518867
chr10-87864121-87864328	3254	0	0
chr10-88582772-88583464	4538	0	0
chr10-88990537-88991383	8485	0	0
chr10-89414649-89415409	5493	1	0.0132716
chr10-89644481-89645291	26637	5	0.0118018
chr10-90857064-90858277	22569	30	0.100617
chr10-91409731-91410816	4441	0	0
chr10-91798214-91798942	10527	0	0
chr10-91908246-91909014	27925	9	0.0213731
chr10-91923674-91924082	3748	1	0.0220807
chr10-92239375-92240244	31921	94	0.231454
chr10-92290667-92291655	6415	1	0.0127948
chr10-92573491-92574710	6926	1	0.0086257
chr10-92592911-92593402	3082	1	0.0275848
chr10-92688937-92690722	16721	1	0.00407594
chr10-92692444-92692671	4278	1	0.0198707
chr10-92848281-92849282	6310	2	0.0202192
chr10-93060270-93063495	23254	50	0.162067
chr10-93065790-93066563	12187	21	0.131566
chr10-93068346-93069283	11904	15	0.0983102
chr10-93073516-93075499	30699	30	0.0774285
chr10-93566473-93567351	21030	42	0.157321
chr10-93600633-93601630	13699	37	0.218274
chr10-93893885-93894424	9020	0	0
chr10-94402267-94403570	31745	3	0.0052424
chr10-94545360-94546136	5158	1	0.0118191
chr10-95183439-95183980	3683	2	0.0352303
chr10-95290429-95291367	8583	0	0
chr10-95693722-95694256	9641	3	0.0260609
chr10-96043115-96044505	9911	2	0.0165491
chr10-96384543-96384756	4731	58	0.873694
chr10-96512451-96514182	7932	0	0
chr10-96586293-96587307	9801	1	0.00785112
chr10-96720276-96720730	7086	1	0.00835429
chr10-96750462-96750670	5152	56	0.813216
chr10-96831951-96833516	12243	0	0
chr10-97043309-97043677	5149	48	0.706297
chr10-97185306-97186482	10755	3	0.0205926
chr10-97292178-97292733	3864	0	0
chr10-97319055-97321291	37475	7	0.0117296
chr10-97333650-97335198	31977	3	0.00474754
chr10-97401058-97401359	5185	1	0.0120325
chr10-97426022-97426537	11895	0	0
chr10-97445720-97446517	6069	1	0.0118235
chr10-97498184-97499763	12562	5	0.0339824
chr10-97570204-97570447	7520	70	0.734169
chr10-97578233-97578484	7748	56	0.569419
chr10-97633030-97633618	6753	1	0.0106213
chr10-97640507-97641225	19681	3	0.010264
chr10-97713328-97714907	14647	2	0.00962381
chr10-97771407-97772211	14788	8	0.0412627
chr10-97849669-97850359	6827	7	0.0788162
chr10-98029858-98031391	7172	5	0.0509498
chr10-987851-988675	3777	0	0
chr10-99232376-99232930	4006	5	0.10285
chr10-99329547-99330898	43771	92	0.16314
chr10-99533259-99533481	4146	0	0
chr10-99534687-99537946	25178	10	0.0280781
chr10-99619952-99621688	11722	1	0.00678046
chr10-99731924-99732597	10267	2	0.0140724
chr11-1007922-1008343	5957	74	0.939563
chr11-1009404-1009649	4775	64	0.877433
chr11-1010480-1010753	3699	50	0.990476
chr11-101127300-101129043	51860	48	0.0663449
chr11-101582627-101583953	8749	24	0.207065
chr11-101914864-101915397	5429	1	0.011168
chr11-102047343-102047762	3487	0	0
chr11-102109902-102111599	14116	2	0.0083671
chr11-1024004-1024492	5070	43	0.687773
chr11-102451799-102453031	5822	1	0.0136604
chr11-1024747-1025359	20509	193	0.746328
chr11-1029084-1029390	8285	34	0.313124
chr11-10293733-10294386	5882	1	0.010276
chr11-10305467-10308284	19590	8	0.0288019
chr11-1031752-1032001	8557	82	0.750927
chr11-1033085-1033356	3617	29	0.611174
chr11-1036421-1036827	5466	40	0.583509
chr11-104036678-104037262	10788	105	0.720673
chr11-10450454-10451187	4903	0	0
chr11-1056332-1056741	11678	99	0.624582
chr11-106077371-106078089	5314	1	0.0133695
chr11-107017598-107019477	10563	4	0.0271263
chr11-10750947-10751542	3541	0	0
chr11-107858224-107858860	4925	0	0
chr11-107928419-107929254	11990	0	0
chr11-108008775-108009672	4035	0	0
chr11-108121278-108122004	6672	2	0.0242529
chr11-108497772-108498680	11310	2	0.0107997
chr11-1085139-1085362	4418	32	0.547928
chr11-108664858-108665469	5443	0	0
chr11-109422794-109423692	13747	14	0.0756287
chr11-109423940-109424257	7309	25	0.268188
chr11-110092515-110093951	10198	0	0
chr11-1102365-1102611	4844	39	0.612173
chr11-110429851-110430610	6327	0	0
chr11-110711117-110713160	9881	0	0
chr11-111514613-111514987	4491	13	0.216812
chr11-111540208-111541474	6987	11	0.126508
chr11-111602000-111603215	9545	2	0.0142546
chr11-111765871-111766490	5891	2	0.0244624
chr11-111878847-111879354	9468	0	0
chr11-112024853-112025723	11842	2	0.0112097
chr11-112086629-112086957	5664	1	0.0145913
chr11-112226300-112226824	7382	1	0.00805143
chr11-113387722-113388099	7659	23	0.233258
chr11-113773578-113773935	3704	0	0
chr11-113875095-113875971	6700	1	0.00895171
chr11-114400078-114400968	14131	1	0.00390762
chr11-114439280-114439864	7186	1	0.0112401
chr11-115502857-115505163	6567	9	0.102324
chr11-1161860-1162244	11007	87	0.592859
chr11-11620575-11622272	4790	1	0.013101
chr11-116772594-116773176	7498	1	0.00783703
chr11-116787696-116788179	9764	0	0
chr11-116790319-116790694	9591	114	0.949786
chr11-116821234-116821644	11751	94	0.641038
chr11-116835766-116836194	8066	4	0.0398144
chr11-117097823-117098796	9273	2	0.0132506
chr11-117315629-117316263	7978	2	0.0173839
chr11-117481977-117482246	5977	50	0.648768
chr11-117518472-117518756	10469	86	0.659865
chr11-117780502-117780714	6631	52	0.603989
chr11-117795920-117797426	12097	13	0.076355
chr11-1178473-1178702	7429	54	0.582622
chr11-1178999-1179340	8297	74	0.697754
chr11-117985924-117986583	5618	1	0.0143571
chr11-1181042-1181375	7688	55	0.574034
chr11-118152638-118153479	4494	0	0
chr11-1182029-1182495	11977	126	0.811386
chr11-118401547-118401831	5345	2	0.0269739
chr11-11841726-11842471	5641	0	0
chr11-118434708-118436990	17202	1	0.00279913
chr11-118530521-118531354	13412	2	0.00933314
chr11-118572302-118572916	5207	1	0.0172372
chr11-118607593-118611181	3873	3	0.0609409
chr11-118634792-118635023	3859	25	0.509784
chr11-118971670-118972223	4096	28	0.53061
chr11-118997932-118998494	7068	1	0.00856818
chr11-119018169-119019405	14239	7	0.040045
chr11-119067483-119068104	6632	0	0
chr11-119084865-119085122	3515	0	0
chr11-119094308-119095754	21897	2	0.00610913
chr11-119107169-119108075	11236	1	0.00495075
chr11-119205932-119206844	9496	1	0.00582493
chr11-119310687-119310960	3868	39	0.769914
chr11-119316238-119317436	6130	1	0.0101466
chr11-119339581-119340948	23885	92	0.293681
chr11-119356387-119357048	4985	2	0.0291894
chr11-119363771-119364504	4818	4	0.057686
chr11-119381421-119381854	5475	1	0.0111625
chr11-1194150-1195241	23226	226	0.742024
chr11-119664850-119665282	14311	110	0.582732
chr11-119727673-119729593	7075	1	0.0112794
chr11-1200346-1200637	6565	56	0.629362
chr11-12008191-12009294	8066	3	0.0278387
chr11-120137339-120138002	18110	178	0.758138
chr11-120210780-120211637	6948	1	0.00873562
chr11-120986017-120986465	10401	4	0.0276118
chr11-121127678-121128177	12371	127	0.792862
chr11-121157864-121158218	8978	106	0.901886
chr11-121451830-121452593	10127	0	0
chr11-122655571-122656771	7617	0	0
chr11-1226601-1226910	8717	79	0.721904
chr11-122882679-122883243	3584	0	0
chr11-122976787-122977900	7478	2	0.0190057
chr11-1230917-1231148	4066	33	0.626548
chr11-123194719-123196278	6843	1	0.0118496
chr11-1232674-1233264	13704	119	0.704801
chr11-123430342-123431121	9924	3	0.0223767
chr11-123577386-123577674	6859	52	0.580289
chr11-1236355-1236576	3878	19	0.370455
chr11-12377611-12378316	8417	11	0.0992933
chr11-1240854-1241368	13707	113	0.636382
chr11-124622769-124623257	3332	0	0
chr11-124673489-124674150	5472	0	0
chr11-124739896-124740575	4229	0	0
chr11-124745494-124745748	9341	89	0.749503
chr11-124758472-124759694	3002	0	0
chr11-124762168-124763343	3130	0	0
chr11-124799482-124800623	36598	5	0.00859361
chr11-124865174-124866569	4746	4	0.0682078
chr11-124868817-124869115	13093	9	0.0473583
chr11-124876014-124876877	11425	9	0.0563641
chr11-124920919-124921458	16015	33	0.147965
chr11-125062835-125063761	6386	2	0.0221549
chr11-1252365-1252631	5024	41	0.60524
chr11-1252840-1253040	3877	43	0.810249
chr11-125495242-125496423	9152	2	0.0135932
chr11-125625339-125625971	7892	0	0
chr11-125904125-125904689	7373	12	0.127189
chr11-126211475-126212133	4579	2	0.0375232
chr11-126268465-126269271	9567	1	0.00820476
chr11-126282828-126283505	9512	0	0
chr11-126303645-126304147	3162	1	0.0262944
chr11-127000331-127000656	4514	6	0.100773
chr11-1276780-1277246	6399	73	0.854362
chr11-128521818-128522716	4570	0	0
chr11-128692777-128695170	7346	0	0
chr11-128810438-128810648	4300	59	0.947218
chr11-1290122-1290389	4805	52	0.780664
chr11-129372635-129376500	4700	5	0.0794555
chr11-129436765-129436987	7438	48	0.475981
chr11-129815843-129816316	5946	18	0.259824
chr11-130032917-130033317	10409	107	0.823097
chr11-130069042-130071020	12039	0	0
chr11-13008784-13011037	47411	93	0.148063
chr11-130123630-130123902	3724	50	0.997404
chr11-130159847-130160367	4918	0	0
chr11-130189649-130189855	5078	47	0.766371
chr11-130208279-130208772	7481	66	0.703318
chr11-130209305-130209746	9067	84	0.714494
chr11-130427507-130428622	25469	8	0.0229546
chr11-130448340-130450303	28755	25	0.0671488
chr11-130473062-130473757	17971	130	0.550436
chr11-130546906-130547203	5308	35	0.500707
chr11-1309161-1310268	7431	1	0.00799994
chr11-131910459-131911638	7965	3	0.0247498
chr11-132942768-132943180	4783	9	0.146431
chr11-133864807-133865269	7017	53	0.579554
chr11-133919378-133921373	43086	331	0.579222
chr11-133955443-133957562	6564	1	0.0120946
chr11-134068956-134069786	5093	1	0.015889
chr11-134223671-134225597	12620	1	0.00680369
chr11-134253316-134254102	8263	1	0.00958493
chr11-134275666-134277286	11702	10	0.0625508
chr11-134331891-134332513	6326	6	0.0783244
chr11-134383567-134384257	28573	232	0.645905
chr11-1388890-1391116	12096	14	0.0898158
chr11-13962520-13964802	10476	10	0.0726772
chr11-14259196-14259618	7472	58	0.592537
chr11-14358263-14359306	7500	0	0
chr11-1443066-1443694	16676	137	0.649662
chr11-1445075-1445980	17908	141	0.614192
chr11-1450110-1450365	4260	28	0.521656
chr11-14520055-14520679	4593	1	0.0156478
chr11-1460549-1461414	11090	106	0.734941
chr11-14643508-14644657	21128	4	0.0134748
chr11-14644786-14645128	4942	1	0.0181025
chr11-1469968-1470295	4996	36	0.536639
chr11-1471290-1471525	3190	29	0.747429
chr11-14891355-14892225	15915	2	0.00744008
chr11-1556476-1557861	50758	284	0.433148
chr11-1571269-1573148	3451	0	0
chr11-16738399-16738839	3043	0	0
chr11-17013297-17014857	16564	2	0.00698658
chr11-17077293-17077959	8847	1	0.00681924
chr11-17387906-17388145	5823	60	0.729721
chr11-17475917-17477079	7726	11	0.106696
chr11-1747750-1749482	13305	115	0.668419
chr11-1753359-1753810	6839	73	0.842872
chr11-17544220-17544505	4254	14	0.251354
chr11-1763576-1764323	6503	0	0
chr11-17719243-17722232	39531	119	0.235092
chr11-17734510-17736739	29808	144	0.376116
chr11-17771730-17772412	17654	169	0.761954
chr11-17779480-17779730	4065	40	0.785426
chr11-18012583-18013721	5161	1	0.0158389
chr11-18105745-18106164	8498	2	0.0195791
chr11-18189338-18189658	5567	35	0.518909
chr11-18526514-18527082	4888	0	0
chr11-18588464-18588916	5745	0	0
chr11-18698535-18699274	4403	3	0.0443256
chr11-18705774-18706180	8294	13	0.120097
chr11-18721144-18721966	6737	1	0.00901098
chr11-19116980-19117669	5511	1	0.0149701
chr11-1926302-1926728	6094	48	0.61251
chr11-19712391-19713791	6607	2	0.0256105
chr11-20156063-20157278	18592	38	0.16381
chr11-20159655-20160779	12837	30	0.175963
chr11-20363616-20364127	4138	0	0
chr11-20387210-20388235	12666	3	0.0172936
chr11-20601175-20601853	15803	29	0.147037
chr11-20669034-20670299	3223	1	0.0197525
chr11-206976-209225	12095	3	0.0162541
chr11-2132804-2133110	5749	2	0.0257577
chr11-2137722-2141254	5734	4	0.0484537
chr11-2166259-2167015	17335	79	0.370708
chr11-22192627-22193774	3532	1	0.0206707
chr11-22341317-22341831	7692	13	0.13105
chr11-22625161-22625895	16811	3	0.0112159
chr11-2268875-2271702	21234	33	0.11978
chr11-22829220-22829838	8145	0	0
chr11-23405407-23405803	7910	61	0.594268
chr11-235919-237290	16488	3	0.0115517
[truncated: 11,862 more rows]

## Sheet: Tar_NA12878_RIMSseq_Rep3
region	total	error	Methylation
chr1-100037927-100038848	3372	0	0
chr1-100132575-100133198	4582	0	0
chr1-100213211-100213542	7647	90	0.959829
chr1-100539013-100540329	18640	2	0.00740925
chr1-1013950-1014471	7797	25	0.280273
chr1-1019389-1020963	5490	3	0.048638
chr1-10326126-10326332	3598	40	0.829363
chr1-103525471-103526291	3594	0	0
chr1-10398492-10399940	7173	0	0
chr1-1040117-1044925	43304	352	0.734257
chr1-10430144-10431015	4746	1	0.0226668
chr1-1045689-1046020	5450	57	0.821357
chr1-1046773-1047131	3282	16	0.450375
chr1-10472121-10472743	4791	0	0
chr1-1047795-1048232	7357	56	0.70083
chr1-1048827-1049049	3020	32	0.864282
chr1-106080772-106081232	7058	40	0.505846
chr1-10638243-10640041	26710	265	0.894009
chr1-10647754-10648083	5349	60	0.949329
chr1-10653782-10654146	6983	77	0.887042
chr1-10654345-10654651	3699	38	0.943552
chr1-10659811-10660524	10754	101	0.838463
chr1-10665131-10665560	8614	77	0.798034
chr1-1067284-1069938	3836	49	0.985592
chr1-10693717-10695464	8469	1	0.00785388
chr1-107056584-107057788	19217	2	0.00691114
chr1-1071837-1072253	7919	46	0.507875
chr1-107480611-107480820	3938	6	0.128193
chr1-107964630-107965419	3397	0	0
chr1-108199779-108200579	6574	1	0.0115252
chr1-1082720-1083010	3516	34	0.736381
chr1-108559917-108560590	4115	1	0.0193038
chr1-108746397-108747200	3018	1	0.0265843
chr1-108963060-108963592	4435	0	0
chr1-109090567-109091010	3268	0	0
chr1-109213843-109214476	3601	0	0
chr1-109258433-109259078	14147	144	0.910929
chr1-109281692-109281904	3423	42	0.970817
chr1-109397453-109398272	8898	1	0.00722772
chr1-109426027-109426948	3930	1	0.0198642
chr1-109466341-109467165	7621	2	0.0200039
chr1-109483832-109484281	3725	0	0
chr1-109493924-109494321	7233	4	0.0433229
chr1-109548418-109548968	4494	0	0
chr1-109655920-109656505	3153	0	0
chr1-109739730-109740684	8388	14	0.142572
chr1-109910522-109911267	3099	1	0.0257856
chr1-109984627-109985404	3852	0	0
chr1-110067644-110070681	7318	6	0.0692981
chr1-110209635-110212172	18278	10	0.0432918
chr1-110223044-110223390	7311	57	0.725744
chr1-110338321-110340178	15591	2	0.0065447
chr1-110407271-110407918	8076	1	0.0104531
chr1-11058974-11060577	8307	4	0.0392555
chr1-110673623-110675675	25749	97	0.332417
chr1-11099331-11100079	5103	0	0
chr1-111203692-111204681	4639	0	0
chr1-111346517-111346917	3184	1	0.0249806
chr1-111448683-111449580	8859	0	0
chr1-111619583-111620215	13507	2	0.00807704
chr1-111738431-111740655	4586	0	0
chr1-111755420-111756370	9607	1	0.00644608
chr1-111981847-111982763	19556	162	0.751666
chr1-111988938-111991151	7828	5	0.0509152
chr1-112508192-112509679	6380	6	0.0773266
chr1-112618970-112619949	7124	1	0.0144896
chr1-112674854-112675475	3652	1	0.0216426
chr1-112714264-112715438	7181	2	0.0248428
chr1-112722952-112723165	3018	12	0.342764
chr1-113072970-113073638	4340	1	0.0250594
chr1-113198852-113199123	3962	35	0.788856
chr1-113389959-113391448	8405	1	0.00818871
chr1-113811752-113812678	14306	2	0.00993969
chr1-113929344-113930277	5635	0	0
chr1-114152515-114154050	3531	3	0.0701091
chr1-114510440-114511643	12618	1	0.00437359
chr1-114780455-114780841	3650	1	0.0220164
chr1-11501310-11502099	18142	152	0.740716
chr1-115089230-115089963	3969	0	0
chr1-11529782-11529987	4611	34	0.667552
chr1-11536326-11536565	5182	45	0.794345
chr1-115837739-115839743	25852	28	0.0902694
chr1-115976526-115976916	3335	0	0
chr1-116372670-116374191	4324	0	0
chr1-11648711-11649220	5570	35	0.585778
chr1-11650403-11650731	5087	4	0.0641147
chr1-11654161-11655249	5646	3	0.0434773
chr1-116570339-116571261	3544	0	0
chr1-11680343-11681660	4260	7	0.155765
chr1-116909582-116910830	4143	1	0.0191357
chr1-116944628-116945023	8559	82	0.847787
chr1-117059767-117060648	5022	1	0.017175
chr1-11719510-11719959	3149	0	0
chr1-11762083-11762306	4719	2	0.038186
chr1-11838337-11838675	6582	69	0.931316
chr1-118987197-118988089	5397	3	0.0437997
chr1-11925587-11926078	4374	0	0
chr1-11934693-11934912	3578	0	0
chr1-119622680-119624003	31037	349	0.983648
chr1-1197448-1197838	8324	60	0.63575
chr1-120068735-120069889	5363	1	0.0132507
chr1-120340913-120342284	4107	0	0
chr1-1206291-1206770	6352	2	0.0246333
chr1-12063432-12064091	4779	0	0
chr1-121097208-121098110	4022	1	0.0195947
chr1-121118209-121118586	4755	1	0.0168357
chr1-1213676-1214144	5353	13	0.211068
chr1-121519060-121519727	3060	1	0.026746
chr1-12166820-12167655	3907	0	0
chr1-1217143-1217754	7903	101	1
chr1-1218405-1219039	7164	72	0.898114
chr1-12191278-12191928	4076	39	0.840791
chr1-1231622-1233605	26508	181	0.608012
chr1-1242506-1242827	4601	44	0.796019
chr1-1246377-1247090	5583	1	0.0139323
chr1-125118140-125119694	6199	46	0.661024
chr1-1255143-1255419	5198	54	0.89635
chr1-12616979-12618636	6100	5	0.069795
chr1-1286018-1294783	53907	454	0.762008
chr1-1296482-1298279	8918	102	0.927643
chr1-1307021-1309805	25125	77	0.282228
chr1-1312607-1313113	7267	91	1
chr1-1318943-1319168	4774	46	0.866559
chr1-1324264-1325255	4786	1	0.0156105
chr1-1327286-1328040	10481	98	0.827079
chr1-1331706-1331906	3483	35	0.860252
chr1-1332056-1333606	23735	217	0.814881
chr1-1336046-1336694	7514	64	0.763544
chr1-1338107-1340460	27416	313	0.992134
chr1-1348554-1351571	5282	1	0.0196616
chr1-13513011-13514118	10788	4	0.028093
chr1-1354328-1355746	28682	62	0.185687
chr1-13554916-13555117	3137	23	0.605961
chr1-13583643-13584373	7509	14	0.158114
chr1-13699987-13700705	6595	0	0
chr1-1373761-1375659	15970	92	0.517023
chr1-13748773-13749963	3909	1	0.0199939
chr1-1387265-1387544	6226	68	0.935128
chr1-1398692-1400222	8361	0	0
chr1-1406729-1407555	7387	2	0.0190699
chr1-1419780-1420620	12353	25	0.176129
chr1-1426181-1426407	3628	7	0.176095
chr1-1427517-1427953	6503	8	0.102731
chr1-1435561-1436069	3819	1	0.0231336
chr1-143736122-143736547	3850	9	0.205683
chr1-143904250-143904674	3504	24	0.630536
chr1-143905323-143905942	4901	1	0.0216905
chr1-1439082-1440204	18253	170	0.823384
chr1-145453912-145454666	7797	32	0.379457
chr1-145823594-145824433	4063	1	0.0265685
chr1-145845533-145845932	5525	0	0
chr1-145858693-145859938	3981	0	0
chr1-145918452-145919050	4599	1	0.0167088
chr1-145927162-145927504	3895	0	0
chr1-145957607-145958063	5762	0	0
chr1-145960386-145962107	23623	7	0.0209008
chr1-14598115-14599497	7416	7	0.077974
chr1-146019305-146019601	6552	6	0.0749335
chr1-1460706-1460958	3495	15	0.37238
chr1-146228090-146229263	4731	0	0
chr1-147171892-147172922	5194	1	0.0147249
chr1-147178044-147178273	4241	9	0.18581
chr1-147242440-147243628	3894	1	0.0201665
chr1-147669721-147670796	3835	0	0
chr1-147908012-147908355	7157	55	0.708796
chr1-148146123-148146930	8264	95	0.96454
chr1-148148926-148149685	6393	66	0.90665
chr1-1481906-1482373	3195	43	0.932298
chr1-148458797-148460187	4946	1	0.0215054
chr1-148678843-148680005	6266	1	0.010964
chr1-149175502-149177055	3120	6	0.0974359
chr1-14923878-14925049	9661	4	0.0331811
chr1-149606800-149608359	4160	0	0
chr1-149792573-149793433	6621	1	0.0106105
chr1-149811970-149812469	3655	1	0.0218166
chr1-149813038-149813657	5319	3	0.0474395
chr1-149886220-149887920	24771	3	0.00637044
chr1-149899527-149900393	8571	72	0.753671
chr1-150149506-150150888	3622	0	0
chr1-150268648-150269254	3314	0	0
chr1-150557180-150557428	3289	25	0.676503
chr1-150578853-150579877	18688	0	0
chr1-150629235-150629725	3074	0	0
chr1-15065686-15066023	3997	30	0.648069
chr1-151047736-151048151	5218	0	0
chr1-151131210-151133624	29343	304	0.920337
chr1-151198372-151199056	3078	0	0
chr1-151399382-151400106	7455	1	0.00957762
chr1-151540186-151540723	4482	0	0
chr1-151611899-151612729	8781	1	0.0115933
chr1-151762970-151763617	8719	0	0
chr1-151837985-151839208	21881	11	0.0388786
chr1-151909288-151909931	3638	1	0.0208393
chr1-1519923-1520512	4496	45	0.830663
chr1-152107522-152112739	80570	218	0.235118
chr1-1522575-1523649	8547	94	0.913639
chr1-1529129-1529426	3107	36	0.907623
chr1-153260997-153261837	20641	17	0.0671945
chr1-1535225-1536210	9367	101	0.961885
chr1-153658590-153658893	4558	3	0.0530525
chr1-153678355-153679899	14546	12	0.0711559
chr1-153689728-153689963	3318	26	0.700616
chr1-153775180-153776222	19963	7	0.0255529
chr1-153941868-153942102	5067	40	0.707729
chr1-153958071-153958654	7147	1	0.0103525
chr1-1539583-1541289	8242	5	0.0479577
chr1-153990752-153991034	3173	0	0
chr1-15409555-15410732	7409	2	0.0214826
chr1-154220368-154221312	5199	3	0.0455234
chr1-154405195-154405969	3137	0	0
chr1-154501632-154503223	10327	36	0.29972
chr1-154558206-154559089	7468	1	0.00941345
chr1-154571343-154572237	19243	177	0.853715
chr1-154607905-154608321	4653	0	0
chr1-154772111-154772388	4550	33	0.654573
chr1-154936487-154937455	3877	1	0.020381
chr1-154961453-154962259	17627	6	0.0250353
chr1-154974267-154975010	5350	0	0
chr1-155050513-155051856	10283	3	0.0205996
chr1-155062450-155064102	6185	13	0.182162
chr1-155078680-155082545	4296	0	0
chr1-155084712-155085580	7040	0	0
chr1-155135532-155136135	9183	1	0.00719681
chr1-155172867-155173462	6409	0	0
chr1-155188537-155192004	9117	53	0.50383
chr1-155208757-155209168	7415	4	0.0427087
chr1-155250292-155250758	8379	2	0.0191456
chr1-155262022-155262521	3658	0	0
chr1-155269488-155269703	4992	60	0.963552
chr1-155277201-155277957	7263	1	0.00975898
chr1-155294528-155295745	17523	60	0.306012
chr1-155320816-155321210	8010	3	0.0307112
chr1-155322679-155325642	31275	39	0.104522
chr1-155562496-155563489	4531	0	0
chr1-155688042-155689334	14141	1	0.0070791
chr1-15584594-15585113	7518	1	0.0113562
chr1-155934282-155934516	3188	0	0
chr1-155950861-155951107	4980	63	0.977275
chr1-155977888-155978699	4638	0	0
chr1-156053172-156054188	3744	3	0.065193
chr1-156076553-156077593	21016	151	0.650421
chr1-156081449-156081933	6078	4	0.0556451
chr1-156114696-156115347	7737	1	0.0086001
chr1-156135917-156136380	6678	61	0.824611
chr1-15617327-15617861	4045	2	0.0464771
chr1-156212794-156213306	4012	0	0
chr1-156245578-156246108	8759	7	0.0681701
chr1-156291409-156291634	5090	45	0.781726
chr1-156368968-156369460	3669	6	0.137471
chr1-156420612-156421927	4698	0	0
chr1-156572308-156572710	3176	0	0
chr1-156623866-156625674	25510	12	0.0358343
chr1-156646762-156647154	8058	42	0.466917
chr1-156657551-156657784	3100	0	0
chr1-156676501-156677468	14189	27	0.163283
chr1-156750956-156752277	10857	1	0.00555046
chr1-156767244-156768221	7589	0	0
chr1-156813732-156814245	7174	0	0
chr1-15684084-15685007	5581	1	0.0129293
chr1-156845090-156846000	12498	43	0.300215
chr1-156848911-156849400	6458	18	0.2493
chr1-156859013-156861310	5293	2	0.0305613
chr1-156907978-156908350	7191	61	0.759685
chr1-156920452-156921014	4806	10	0.197655
chr1-156923728-156924440	6000	3	0.039018
chr1-156927408-156928004	10001	8	0.0662653
chr1-15727122-15727480	5579	60	0.952484
chr1-1574103-1575367	4168	0	0
chr1-15744134-15744358	3002	21	0.628491
chr1-158180831-158181713	8542	4	0.0423328
chr1-15847395-15848901	8145	1	0.00864701
chr1-15934376-15934660	5533	63	0.921502
chr1-15943406-15943764	6293	57	0.814306
chr1-15944097-15945087	15850	158	0.882173
chr1-159780627-159781563	8155	1	0.00855312
chr1-159854217-159855130	9264	3	0.0233874
chr1-1598952-1600756	14502	25	0.145531
chr1-159929643-159930063	7130	72	0.854552
chr1-160031506-160032199	4792	0	0
chr1-160083932-160084948	21256	96	0.407112
chr1-160343139-160343548	5001	0	0
chr1-160419314-160419596	4888	47	0.805511
chr1-16073154-16073496	3338	1	0.0323141
chr1-161020929-161021435	4539	1	0.0175932
chr1-161038588-161039040	8390	6	0.0578305
chr1-161079557-161079947	7845	84	0.900194
chr1-161098273-161099011	9934	7	0.0582674
chr1-161117933-161118322	7380	0	0
chr1-161166212-161166896	3520	0	0
chr1-161177272-161177661	4401	0	0
chr1-161202020-161202466	3094	0	0
chr1-161258688-161259238	5816	12	0.174775
chr1-16137882-16138126	4206	38	0.812795
chr1-16148617-16148829	4706	36	0.717295
chr1-1615074-1616635	17100	12	0.0567994
chr1-161524235-161525566	7334	18	0.221331
chr1-16154990-16155965	3709	1	0.0200795
chr1-161605745-161607118	8230	72	0.772846
chr1-161725848-161727508	18759	5	0.0225639
chr1-161749625-161750286	6801	0	0
chr1-161983827-161984249	6455	39	0.557722
chr1-162023233-162024341	3290	20	0.534782
chr1-16206423-16208085	15445	62	0.353852
chr1-162069429-162070262	3083	0	0
chr1-1623208-1623979	13833	137	0.871419
chr1-162367087-162367531	7852	59	0.656451
chr1-162497810-162498237	6078	0	0
chr1-1625401-1625675	4567	54	0.98898
chr1-1626670-1634630	50564	288	0.51344
chr1-16367127-16367775	3250	0	0
chr1-16440504-16441308	3982	0	0
chr1-165354955-165357091	3473	0	0
chr1-165698308-165698580	4416	0	0
chr1-165768596-165769112	4966	0	0
chr1-165827417-165828446	4855	1	0.0158792
chr1-166165022-166167211	6194	5	0.066765
chr1-16646991-16648550	25292	118	0.408875
chr1-166875760-166876536	3849	1	0.0203354
chr1-166920540-166921412	16430	52	0.278015
chr1-16707274-16708233	6337	8	0.108803
chr1-167553233-167553833	8508	3	0.0291951
chr1-16758917-16760479	4500	25	0.4803
chr1-167630236-167630602	3962	0	0
chr1-167721742-167722615	4353	0	0
chr1-167820159-167820409	3102	3	0.0799346
chr1-167935790-167936877	3055	0	0
chr1-168056271-168056484	5123	69	0.796671
chr1-168136079-168136920	5539	2	0.0323635
chr1-168178726-168179399	3072	1	0.0287892
chr1-168225708-168226601	3120	0	0
chr1-16888927-16889599	3548	2	0.0449583
chr1-169105529-169107173	4383	0	0
chr1-169485321-169486339	6334	0	0
chr1-16955324-16955561	5017	52	0.853779
chr1-16960796-16961189	5545	1	0.0126898
chr1-16966410-16966620	3099	30	0.802195
chr1-17005391-17005598	3671	38	0.853499
chr1-17011335-17012087	4219	1	0.0182432
chr1-170664162-170665037	5048	3	0.0495807
chr1-17119157-17119593	3897	2	0.0473742
chr1-171670808-171671084	3715	37	0.881942
chr1-171784277-171784489	3331	37	0.947133
chr1-171841328-171842185	4941	1	0.0175018
chr1-172532771-172533405	8695	0	0
chr1-173476840-173477966	4035	3	0.0631173
chr1-17437577-17439981	7826	0	0
chr1-174999354-175000488	3830	0	0
chr1-175079415-175079738	6808	52	0.670777
chr1-1753935-1754532	8582	87	0.901592
chr1-176206576-176207675	8864	0	0
chr1-17622958-17623175	3363	15	0.386082
chr1-17696987-17697297	7181	64	0.789492
chr1-177164257-177164710	5173	5	0.0796841
chr1-178094119-178094711	5902	5	0.0695982
chr1-17825884-17826347	7047	27	0.334426
chr1-178486665-178487151	3634	9	0.213052
chr1-179081941-179082813	7128	1	0.0119043
chr1-179229029-179230065	6931	0	0
chr1-179575586-179576172	7974	20	0.214492
chr1-179586230-179586915	3746	16	0.39745
chr1-179882348-179883236	11166	1	0.00593322
chr1-180154421-180155449	6958	0	0
chr1-180228985-180235840	3813	2	0.0416513
chr1-180631892-180632680	4148	2	0.0398391
chr1-180935181-180935575	10382	96	0.82115
chr1-181022584-181023013	3087	0	0
chr1-18107612-18108319	4675	8	0.143731
chr1-181088368-181090040	21849	2	0.00549776
chr1-181413155-181413712	10365	81	0.695227
chr1-181483571-181483937	5338	16	0.263036
chr1-181798358-181798757	6258	43	0.624619
chr1-182056470-182057376	18133	91	0.435058
chr1-182390563-182392428	10279	3	0.0228232
chr1-182952685-182953509	11664	48	0.365273
chr1-183022670-183024235	8135	1	0.00818077
chr1-183472491-183473120	4395	0	0
chr1-183635149-183636198	4125	0	0
chr1-18365381-18365587	3849	14	0.330828
chr1-18376802-18377002	3634	18	0.46096
chr1-184036226-184037632	8392	6	0.0611652
chr1-184051648-184051920	3554	0	0
chr1-184754119-184755304	5491	1	0.0136429
chr1-18482380-18483173	17941	172	0.855066
chr1-184973731-184974645	3937	2	0.0395158
chr1-18630402-18633335	5053	1	0.0208493
chr1-18854452-18854975	8952	72	0.71882
chr1-18877381-18877740	5193	62	0.940146
chr1-18883133-18883420	4012	40	0.860001
chr1-1889967-1891833	6947	0	0
chr1-18902335-18903140	4022	1	0.0191088
chr1-18955455-18957389	14107	3	0.0138632
chr1-1918660-1919952	9461	3	0.022629
chr1-19209658-19210552	6709	1	0.0105416
chr1-19251391-19252214	8295	1	0.0121622
chr1-19273756-19274448	8146	62	0.650473
chr1-19288505-19289166	7588	52	0.585775
chr1-193059092-193060141	10029	3	0.0238682
chr1-193105045-193105434	3612	0	0
chr1-19311714-19312815	7714	1	0.00952854
chr1-19485210-19486150	3119	0	0
chr1-19596848-19597508	3754	0	0
chr1-19664654-19666295	10199	21	0.177455
chr1-19679018-19679372	6187	63	0.870858
chr1-197146149-197146861	6832	0	0
chr1-197902459-197903169	7140	0	0
chr1-197917959-197918661	4265	2	0.0431616
chr1-197921349-197921694	4815	6	0.105118
chr1-19882315-19882969	11216	0	0
chr1-200039265-200039919	4190	1	0.0184295
chr1-200147569-200148076	8385	85	0.859819
chr1-200873069-200874260	21037	80	0.333166
chr1-200911466-200912142	8955	88	0.868406
chr1-201000496-201000810	4640	41	0.791186
chr1-201023155-201023871	6032	3	0.0383327
chr1-201114331-201115439	14561	58	0.356013
chr1-201226903-201227139	3860	24	0.555999
chr1-201283325-201284520	5243	21	0.363519
chr1-201399134-201399904	6956	15	0.185956
chr1-201468392-201469520	7603	9	0.103396
chr1-201506758-201507388	10027	3	0.0212396
chr1-201647914-201650660	15295	70	0.408995
chr1-201829086-201829570	3835	1	0.0200635
chr1-201888787-201889178	4010	3	0.0600736
chr1-201955209-201955925	3214	0	0
chr1-201982458-201983451	12434	2	0.011204
chr1-202144024-202145015	4230	0	0
chr1-202193881-202194262	4759	1	0.016381
chr1-202214066-202214535	3808	10	0.228758
chr1-202348530-202349068	5734	2	0.0273297
chr1-2025608-2025947	3841	21	0.485549
chr1-2027976-2028428	4873	39	0.702747
chr1-202806876-202808599	6207	3	0.0370332
chr1-202888556-202889266	4684	0	0
chr1-202966918-202967499	3350	1	0.023985
chr1-2029969-2030411	6987	63	0.822362
chr1-203007201-203007900	6759	0	0
chr1-203075595-203076262	4661	6	0.107157
chr1-203305170-203306210	4593	2	0.0356267
chr1-20343074-20343525	6081	13	0.183954
chr1-204151271-204152433	8534	7	0.0691394
chr1-204190471-204190705	4043	1	0.0216705
chr1-204257417-204257780	5954	44	0.644147
chr1-204411186-204412031	4809	0	0
chr1-20483970-20487018	6300	5	0.0693896
chr1-2049813-2051773	3748	1	0.0203272
chr1-205069657-205070025	5277	48	0.821393
chr1-205210836-205211782	8167	1	0.0130915
chr1-205241568-205242036	7905	63	0.700282
chr1-205268985-205269418	8459	74	0.799957
chr1-205321105-205321907	8138	2	0.0194453
chr1-205343366-205344448	5309	13	0.214041
chr1-20552402-20554002	20174	12	0.0475205
chr1-205528876-205529462	7090	16	0.191891
chr1-205568624-205569438	4783	3	0.0505622
chr1-205662850-205663126	5306	63	0.910401
chr1-205849771-205850063	3213	26	0.707405
chr1-20633372-20634058	9627	2	0.0158621
chr1-206506904-206508111	11442	4	0.0251074
chr1-20661024-20661745	4987	1	0.0152314
chr1-206635179-206635842	4763	1	0.015707
chr1-206684882-206686306	6010	0	0
chr1-206909349-206909857	7204	3	0.0311413
chr1-20704516-20704876	7200	58	0.706098
chr1-207050745-207051105	6681	0	0
chr1-20717340-20718278	6695	15	0.194026
chr1-207321199-207322019	3261	0	0
chr1-207454187-207454935	4668	0	0
chr1-207496293-207496670	3175	0	0
chr1-207644967-207645607	5261	4	0.0616868
chr1-207669461-207669914	3189	16	0.438914
chr1-207751827-207752619	5278	1	0.0137323
chr1-207910754-207911168	3604	0	0
chr1-207963322-207963838	7712	1	0.00862414
chr1-209625805-209626009	3407	31	0.794522
chr1-209675099-209676083	5411	0	0
chr1-209937835-209938709	4115	2	0.0404839
chr1-210328744-210329449	9816	0	0
chr1-210683718-210683920	4152	46	0.933656
chr1-211133326-211134333	3188	2	0.0505761
chr1-211207065-211207441	5087	49	0.838367
chr1-211258764-211260792	7202	2	0.0222515
chr1-211326590-211327294	4256	1	0.0177117
chr1-211416336-211416879	7483	68	0.794941
chr1-211478965-211479412	6241	19	0.260335
chr1-211577780-211579835	13954	1	0.00452314
chr1-21176623-21177343	3580	0	0
chr1-21225082-21225438	4105	41	0.83619
chr1-212284626-212286352	4623	1	0.0164594
chr1-212414250-212414942	5026	2	0.0322964
chr1-212432764-212433502	3942	1	0.0193343
chr1-212699119-212700706	3628	0	0
chr1-212791525-212792005	6425	0	0
chr1-212858018-212858777	8290	2	0.0187549
chr1-21289888-21290608	8657	3	0.0251999
chr1-212950306-212951750	17892	14	0.0691553
chr1-213015178-213015482	3796	0	0
chr1-213051270-213051525	3182	0	0
chr1-21344868-21345826	4687	0	0
chr1-21427996-21429502	9879	48	0.431767
chr1-214280754-214281704	6343	1	0.0113547
chr1-21436578-21436923	4455	19	0.377754
chr1-214383823-214384099	4699	39	0.741468
chr1-214605566-214606366	8188	74	0.797296
chr1-214608320-214609213	10363	121	0.971317
chr1-214870435-214870660	4283	47	0.921334
chr1-215567165-215567923	4970	2	0.0306001
chr1-21603687-21603887	4499	35	0.708798
chr1-21782637-21783768	5689	0	0
chr1-21814407-21814914	9867	30	0.267642
chr1-21828808-21829072	4327	39	0.808368
chr1-2184994-2185362	5092	42	0.745645
chr1-21864857-21865099	4644	37	0.713487
chr1-21884500-21884825	5191	42	0.728306
chr1-21887410-21887626	3617	28	0.610875
chr1-219173768-219174230	3734	0	0
chr1-21936854-21937784	3271	0	0
chr1-219927791-219928805	13963	13	0.0809534
chr1-220046075-220046719	3831	1	0.0202223
chr1-220093973-220094592	5811	0	0
chr1-220528120-220529006	4551	1	0.0173574
chr1-220690166-220690907	9073	1	0.00750707
chr1-220786675-220787261	6331	5	0.0636172
chr1-220878625-220880331	10501	2	0.0158329
chr1-220882151-220882458	4184	52	0.882102
chr1-220884122-220884870	9387	81	0.760461
chr1-22120028-22120450	6837	82	0.866938
chr1-22142420-22143759	4020	0	0
chr1-222618058-222618741	3373	1	0.0233029
chr1-2226774-2229734	17708	4	0.0145624
chr1-223363501-223365286	3838	2	0.0405841
chr1-223393301-223393926	10238	34	0.295952
chr1-223394340-223394644	5064	47	0.810984
chr1-223712289-223713121	6329	0	0
chr1-223748641-223749342	4435	5	0.0937434
chr1-223845384-223846561	5699	2	0.0281091
chr1-224114207-224114770	4207	2	0.0386556
chr1-224182884-224184053	5348	0	0
chr1-224356822-224357522	3989	0	0
chr1-224615936-224617612	6129	1	0.0172384
chr1-224929519-224930079	7470	4	0.0437614
chr1-225652569-225654093	18985	3	0.0113385
chr1-22576310-22576920	10526	95	0.813375
chr1-225887451-225887980	7177	41	0.501205
chr1-225923943-225924852	5616	4	0.0594262
chr1-22593281-22593714	5604	30	0.484386
chr1-225939413-225939995	7438	54	0.647169
chr1-225999103-225999635	3685	0	0
chr1-22600653-22601049	6446	41	0.555372
chr1-226186335-226187059	8280	2	0.01861
chr1-226223307-226224179	10252	4	0.0320812
chr1-226308661-226309800	15545	2	0.00831072
chr1-226407633-226408238	3947	0	0
chr1-22647558-22647810	3840	24	0.579599
chr1-226548680-226549711	5781	1	0.0151931
chr1-226736860-226738852	11915	24	0.172824
chr1-226976039-226976536	6157	51	0.725197
chr1-22710331-22711869	3682	0	0
chr1-227734943-227735730	12046	1	0.00492591
chr1-227786728-227787126	4774	30	0.572549
chr1-227787595-227788869	13478	10	0.0598657
chr1-227816127-227816382	3107	29	0.787431
chr1-22784412-22785074	10122	78	0.710251
chr1-227925250-227925514	4732	30	0.556979
chr1-227946722-227948581	3571	0	0
chr1-228006396-228008811	4117	5	0.107961
chr1-228058931-228059496	10640	23	0.193307
chr1-228101969-228103483	22410	2	0.00544943
chr1-228139808-228140859	5559	2	0.028811
chr1-228157677-228158999	26059	258	0.883083
chr1-228165408-228166285	8583	2	0.0173299
chr1-228173917-228174990	5880	49	0.71857
chr1-228211771-228214336	40233	328	0.729471
chr1-228215532-228215827	3912	27	0.589516
chr1-228216448-228216696	4368	59	0.970121
chr1-228217017-228217312	4509	48	0.943038
chr1-228274185-228274438	4678	40	0.765213
chr1-228275549-228276787	12659	32	0.21905
chr1-228280264-228280796	9445	75	0.721601
chr1-228286135-228286342	3711	26	0.636364
chr1-228315856-228317061	12708	110	0.752475
chr1-228321853-228322062	4319	35	0.697053
chr1-228360377-228360629	4520	36	0.701433
chr1-228378249-228379420	9491	13	0.114618
chr1-228394728-228395193	7737	76	0.883853
chr1-228406111-228407012	10062	0	0
chr1-228424880-228425402	10668	92	0.728083
chr1-228457407-228458733	18375	6	0.0244334
chr1-228463747-228464828	7745	3	0.0334661
chr1-228486646-228487914	7494	0	0
chr1-228646196-228648421	7055	13	0.156027
chr1-228735064-228736550	7126	9	0.105618
chr1-229270900-229271382	3648	0	0
chr1-229342163-229343188	7409	0	0
chr1-229431460-229434937	26206	95	0.323235
chr1-229507967-229508546	5281	0	0
chr1-22953061-22954076	18246	71	0.345495
chr1-229558026-229559327	11644	2	0.0122874
chr1-229594595-229594870	5045	52	0.876448
chr1-230066748-230068462	4535	1	0.0161428
chr1-23019322-23020184	9144	1	0.00745166
chr1-230332759-230333104	3236	21	0.518944
chr1-230356971-230357199	4614	30	0.616151
chr1-2303870-2304228	6279	73	0.920956
chr1-230425358-230426956	9430	1	0.00668807
chr1-2305004-2307630	13782	150	0.942292
chr1-230642332-230642847	3943	1	0.0221728
chr1-230867886-230868909	8954	0	0
chr1-230978126-230979127	7838	1	0.00875222
chr1-231039317-231041263	6514	0	0
chr1-231162067-231163651	15300	42	0.237701
chr1-231241051-231241497	5217	2	0.0305329
chr1-231337520-231338636	11217	2	0.0131892
chr1-231420936-231422701	16593	1	0.00341259
chr1-231626713-231627369	3024	0	0
chr1-232805309-232805961	15714	0	0
chr1-232950446-232950849	3025	0	0
chr1-232986182-232986390	3877	34	0.789707
chr1-233295404-233295794	3899	0	0
chr1-233327252-233328765	15899	2	0.00770794
chr1-233613699-233614804	6806	1	0.0103621
chr1-233904708-233905711	8732	19	0.184391
chr1-234214139-234214725	3942	3	0.0639073
chr1-234231390-234231750	6927	65	0.849999
chr1-23424304-23425170	3906	0	0
chr1-234356739-234356967	3237	8	0.232138
chr1-23436662-23437478	9751	52	0.466548
chr1-234373238-234373755	6881	1	0.0152214
chr1-234478191-234479226	21400	1	0.00100994
chr1-234608531-234611278	20783	0	0
chr1-23483485-23484862	6669	2	0.0237031
chr1-235128426-235129072	4232	0	0
chr1-235160950-235161402	5603	1	0.0140219
chr1-23530542-23531597	4999	0	0
chr1-235503790-235505319	4185	0	0
chr1-23559192-23559721	5837	2	0.0257252
chr1-235993574-235993971	7333	77	0.900509
chr1-236064383-236065517	5950	5	0.0690871
chr1-236142010-236143374	9259	6	0.0585719
chr1-236281304-236282400	4087	0	0
chr1-236395160-236395850	4667	4	0.0698534
chr1-236686173-236687023	5376	22	0.359388
chr1-236795015-236795902	10852	1	0.00626866
chr1-237041827-237043344	4533	3	0.0531884
chr1-23743206-23744125	6547	2	0.0292817
chr1-23778013-23778773	5752	3	0.0427595
chr1-237783888-237784148	4845	33	0.649514
chr1-2384915-2385310	4481	46	0.844436
chr1-23867765-23868500	11510	2	0.0120195
chr1-23902626-23903047	7958	41	0.466218
chr1-2391043-2392325	5612	2	0.0267142
chr1-239386956-239388039	3875	7	0.158248
chr1-23979874-23980527	4581	0	0
chr1-240091660-240093763	28926	36	0.104483
chr1-2402112-2402733	4186	46	0.926002
chr1-240492875-240493420	8458	91	0.851241
chr1-2408438-2408807	5737	60	0.910772
chr1-2411947-2413278	7532	2	0.0205163
chr1-241519174-241519812	4463	0	0
chr1-241639882-241640159	3340	0	0
chr1-242523615-242525380	5276	4	0.0655094
chr1-244054973-244055236	6306	72	0.927582
chr1-244451151-244452299	8469	0	0
chr1-244461200-244461618	5222	0	0
chr1-244652898-244653778	3887	0	0
chr1-244730140-244731064	7609	2	0.0177433
chr1-244834722-244835840	3668	1	0.0211516
chr1-244862883-244864718	15863	1	0.00339293
chr1-244970000-244971409	7840	0	0
chr1-245153246-245156945	14394	5	0.0251749
chr1-245685238-245685801	8216	75	0.832978
chr1-245687876-245689212	22781	198	0.749695
chr1-24642537-24643705	9760	0	0
chr1-246506847-246507466	4934	3	0.0522309
chr1-246565906-246566974	4733	0	0
chr1-246723963-246724726	5307	0	0
chr1-246931184-246932365	7758	0	0
chr1-247078278-247078899	3662	0	0
chr1-247103878-247104582	6241	2	0.0233388
chr1-247111284-247112455	17301	17	0.080567
chr1-247300547-247301408	12560	128	0.8673
chr1-247330948-247332538	16720	3	0.0140391
chr1-24744862-24746095	4775	0	0
chr1-247451394-247451642	3815	39	0.888889
chr1-247857029-247857950	11077	7	0.0501761
chr1-2479687-2479965	5066	44	0.773991
chr1-248811897-248812318	10054	124	0.975933
chr1-248847365-248848597	32197	357	0.987521
chr1-248858213-248859220	12503	1	0.00430203
chr1-24902006-24902641	8321	87	0.911207
chr1-24929037-24932514	8291	0	0
chr1-2502148-2502626	9132	67	0.65519
chr1-2504116-2504389	5618	40	0.650263
chr1-2508688-2509039	5059	68	1
chr1-2513917-2514209	3311	33	0.878901
chr1-2518484-2518767	3185	36	0.969344
chr1-2519779-2520112	3949	44	0.955088
chr1-25232073-25232687	6043	0	0
chr1-25246476-25248030	14455	2	0.00889205
chr1-2525803-2526820	4481	0	0
chr1-2529322-2530571	16626	3	0.0132039
chr1-25430075-25431624	5059	2	0.0293679
chr1-25543403-25544551	3714	0	0
chr1-25617484-25618281	10274	27	0.231144
chr1-25858982-25859865	4048	0	0
chr1-2585959-2587453	12432	1	0.00459051
chr1-26035103-26036217	4283	0	0
chr1-26045791-26046822	3801	6	0.133521
chr1-26110829-26112426	9172	0	0
chr1-26161317-26162115	16483	20	0.108701
chr1-26164032-26164557	5862	4	0.0545208
chr1-26169689-26170333	7401	1	0.00928821
chr1-26279872-26280422	4297	1	0.0206268
chr1-26336048-26336975	10807	3	0.0227058
chr1-26345955-26346159	3391	17	0.441075
chr1-26411092-26411657	5957	4	0.0569107
chr1-26471876-26473351	5359	0	0
chr1-26529581-26530193	4808	0	0
chr1-26695343-26697530	20784	3	0.00757199
chr1-26826740-26827183	6257	3	0.0367889
chr1-26863422-26863637	3868	40	0.85737
chr1-26889671-26890554	9198	0	0
chr1-26900002-26900518	7774	2	0.0199719
chr1-26921558-26922128	5165	1	0.0149331
chr1-26993637-26994655	14262	2	0.013107
chr1-27006103-27006491	8437	61	0.620701
chr1-27012389-27012950	7586	16	0.181899
chr1-27201394-27201594	3856	35	0.79162
chr1-27321963-27322515	6241	1	0.0115841
chr1-27349429-27351525	25438	191	0.673594
chr1-27360534-27361252	10209	25	0.210267
chr1-27365922-27366752	7850	1	0.00848083
chr1-27383111-27383341	3063	10	0.293386
chr1-27547907-27548127	3831	31	0.734607
chr1-27549882-27551036	18508	173	0.847791
chr1-27615355-27615813	7156	67	0.851627
chr1-27668217-27668520	6684	71	0.933865
chr1-27725635-27726491	3754	0	0
chr1-27830711-27831277	3109	0	0
chr1-27872521-27872746	3351	1	0.026409
chr1-2789461-2790396	18270	59	0.27711
chr1-27914074-27915024	12445	2	0.011714
chr1-27958510-27958793	4231	42	0.771135
chr1-27959509-27960327	6552	1	0.0103706
chr1-2800177-2800668	10535	99	0.791953
chr1-28236000-28236465	5982	1	0.0143137
chr1-28259321-28260622	5610	0	0
chr1-28530526-28530799	3312	32	0.777643
chr1-28552891-28553192	4593	2	0.0353115
chr1-28592480-28592942	4880	5	0.08893
chr1-28736555-28737803	6987	0	0
chr1-28811990-28812836	7224	8	0.0920027
chr1-28862796-28863440	12626	109	0.77548
chr1-29121188-29125335	17720	25	0.120278
chr1-29181465-29182174	6667	1	0.0105462
chr1-29230709-29231115	4071	0	0
chr1-29236234-29238795	3921	0	0
chr1-29259386-29260086	7809	2	0.0177442
chr1-29260576-29260900	4958	5	0.0873817
chr1-3022070-3022479	6613	40	0.553692
chr1-3067362-3071398	4940	1	0.0172046
chr1-30718126-30719113	7414	0	0
chr1-30721430-30721740	5080	46	0.803609
chr1-30907998-30909119	4054	0	0
chr1-31065566-31066091	3845	0	0
chr1-31181576-31181986	5528	0	0
chr1-31239232-31239965	3628	1	0.0224378
chr1-31296400-31297131	4325	1	0.0174209
chr1-31412948-31414163	8304	2	0.0210253
chr1-31586871-31587170	6216	63	0.865346
chr1-31644610-31645360	4553	1	0.0229494
chr1-31742886-31743103	3205	19	0.512615
chr1-3185977-3186788	6102	58	0.856008
chr1-32013502-32014982	10914	0	0
chr1-32072605-32073451	4486	0	0
chr1-32204969-32206284	14250	29	0.1883
chr1-32221921-32222439	6741	1	0.0104684
chr1-32275110-32275943	9740	77	0.708053
chr1-32291814-32292433	3635	0	0
chr1-32335259-32336628	4442	0	0
chr1-32361344-32362416	13136	35	0.229392
chr1-32394170-32394747	3530	0	0
chr1-32650943-32651762	4461	0	0
chr1-32702419-32703264	3624	0	0
chr1-32741534-32742273	4845	1	0.015204
chr1-32753827-32754379	3948	1	0.0223825
chr1-32817075-32818305	3265	1	0.0246112
chr1-32892869-32893848	5611	2	0.0287134
chr1-32901192-32901721	3646	2	0.0427745
chr1-32963931-32965015	12314	1	0.00474575
chr1-33147376-33147720	6009	65	0.897298
chr1-33159659-33159926	4903	49	0.853332
chr1-33180726-33182272	12352	1	0.0045162
chr1-33255848-33257064	5666	1	0.013262
chr1-33276174-33276780	7787	68	0.747539
chr1-33306546-33307174	10548	47	0.389358
chr1-33625006-33625254	3227	22	0.617455
chr1-3404706-3405746	7866	72	0.820481
chr1-3411428-3412860	24492	191	0.705755
chr1-34163183-34165375	6286	11	0.148271
chr1-3425975-3426242	3121	18	0.523054
chr1-34761428-34761675	5356	43	0.708834
chr1-3478138-3478627	4400	43	0.85788
chr1-34784818-34785135	5896	42	0.659687
chr1-34865684-34866808	7098	0	0
chr1-34868704-34868905	4735	44	0.837098
chr1-34885431-34886253	11305	9	0.0655933
chr1-34985049-34985436	4549	1	0.0170041
chr1-3509013-3509233	4053	27	0.603111
chr1-35191867-35192723	9771	0	0
chr1-35192873-35193210	4108	1	0.0188617
chr1-35268623-35269254	4898	2	0.030452
chr1-3530886-3531495	4665	0	0
chr1-35573249-35574450	17119	155	0.797677
chr1-35807899-35808860	4321	0	0
chr1-35930649-35931661	3547	3	0.0720871
chr1-36088725-36089354	6345	0	0
chr1-3611056-3611514	4389	3	0.057757
chr1-36149255-36149861	3858	1	0.0207671
chr1-36155851-36156709	5280	1	0.0139481
chr1-36176156-36176860	13439	136	0.902467
chr1-36178355-36179042	13248	135	0.899041
chr1-3624204-3625677	14640	1	0.00679748
chr1-36306230-36307408	14193	5	0.0259839
chr1-36320900-36323801	23454	108	0.416156
chr1-36341762-36341983	3751	43	0.816864
chr1-36463814-36464530	5638	1	0.0130666
chr1-3649781-3653072	4294	1	0.0175064
chr1-3690533-3690989	3551	33	0.810641
chr1-37032777-37035023	5396	7	0.108191
chr1-3732731-3733110	7189	57	0.698527
chr1-37514312-37514964	3783	1	0.0288451
chr1-37554006-37554222	5929	0	0
chr1-37556852-37557118	3001	20	0.593543
chr1-37691624-37692914	4315	1	0.0182087
chr1-37752519-37753223	9683	7	0.0583047
chr1-37753622-37754340	3594	1	0.0221957
chr1-37761408-37762069	14764	110	0.667994
chr1-37764167-37765216	3351	11	0.281836
chr1-37793424-37794755	11358	12	0.089025
chr1-37807737-37808730	16503	1	0.00279422
chr1-3786901-3787344	6580	54	0.7496
chr1-37931565-37932049	11007	0	0
chr1-3795835-3796668	12241	3	0.0158403
chr1-37989561-37990097	4231	0	0
chr1-38044431-38047970	47594	14	0.0201501
chr1-38708708-38709268	5541	55	0.906125
chr1-38859144-38860049	9810	0	0
chr1-38872808-38873677	7444	2	0.0188895
chr1-38990984-38991599	5364	2	0.0299633
chr1-3899793-3901520	3499	0	0
chr1-39104994-39106187	3450	0	0
chr1-39490753-39492465	26740	23	0.0696653
chr1-39514694-39516096	3520	3	0.07135
chr1-39575646-39576995	5568	1	0.0139924
chr1-39639339-39640035	4840	1	0.0162402
chr1-39671551-39672415	4494	2	0.0362307
chr1-39683760-39684341	5389	14	0.231339
chr1-39738641-39739067	4176	0	0
chr1-39770096-39771518	3973	4	0.0881183
chr1-39788012-39789500	18181	30	0.139602
chr1-39883270-39883616	3560	0	0
chr1-39900924-39902541	17161	2	0.005683
chr1-39954816-39955694	4051	1	0.0193227
chr1-40096995-40097456	4164	0	0
chr1-40132837-40133537	6942	78	0.886793
chr1-40161242-40161940	5497	0	0
chr1-40303515-40304199	14179	166	0.995404
chr1-40315333-40315773	3166	0	0
chr1-40316549-40317473	3127	3	0.0787834
chr1-40691491-40692303	4250	0	0
chr1-40783419-40784489	7546	2	0.0227958
chr1-40818169-40818919	7454	1	0.00994709
chr1-40838060-40838764	6233	67	0.872525
chr1-40861278-40862613	12199	10	0.0676295
chr1-41017747-41018021	5626	63	0.912016
chr1-41361009-41362618	11280	4	0.0266039
chr1-41381582-41383465	18536	8	0.0338632
chr1-42380308-42381317	6756	2	0.0235113
chr1-42456046-42456904	8645	0	0
chr1-42658307-42658751	3496	1	0.0222615
chr1-42681830-42683345	4772	0	0
chr1-42766544-42767688	19718	1	0.00228321
chr1-42957797-42959097	4584	1	0.0159793
chr1-43171833-43172381	8782	0	0
chr1-43272814-43273158	6062	41	0.606365
chr1-43304852-43305209	9143	93	0.889497
chr1-43348635-43349606	8002	64	0.710604
chr1-43358464-43359388	4402	1	0.0195925
chr1-43389705-43390250	6218	0	0
chr1-43453590-43454143	6493	1	0.0106856
chr1-43530759-43531829	5412	2	0.0293585
chr1-43591085-43591508	10141	93	0.803026
chr1-43597799-43598086	6409	54	0.750667
chr1-43605222-43605471	3801	28	0.6612
chr1-43936086-43936751	13527	21	0.131126
chr1-43969738-43970442	3334	1	0.0241783
chr1-43974471-43975584	9134	2	0.014579
chr1-43991479-43992100	10660	2	0.0118973
chr1-44103320-44103727	5351	32	0.536693
chr1-44631610-44632377	5391	1	0.019931
chr1-44654566-44655051	7726	70	0.84572
chr1-44674099-44674912	3469	0	0
chr1-44724034-44724886	15154	169	0.910538
chr1-44739652-44740073	3410	0	0
chr1-44775342-44776228	6881	1	0.0120588
chr1-44784189-44784680	9636	3	0.0225512
chr1-44786291-44786620	4331	0	0
chr1-44799863-44801111	11588	6	0.0430838
chr1-44806008-44806646	15079	150	0.843167
chr1-44813094-44813956	15986	89	0.497077
chr1-45010554-45011350	10734	1	0.00548662
chr1-45205668-45206716	12434	3	0.0190375
chr1-45326748-45327629	11255	5	0.0344167
chr1-45339893-45340311	4141	0	0
chr1-45583919-45584910	3719	0	0
chr1-45622523-45623470	18457	192	0.890395
chr1-46132455-46133457	3842	0	0
chr1-46203150-46203586	3645	2	0.0433609
chr1-46301754-46303364	10621	1	0.00592137
chr1-46340668-46341164	3836	0	0
chr1-46394053-46394619	5019	11	0.185716
chr1-46532961-46533577	10272	1	0.00581987
chr1-4653930-4656495	4610	1	0.0160638
chr1-46612909-46613295	8749	103	0.962621
chr1-46668003-46668723	6686	1	0.0107862
chr1-47023555-47023961	3088	4	0.107612
chr1-4711593-4712485	12455	83	0.584768
chr1-47225309-47226055	10524	3	0.0238678
chr1-47230833-47232525	5480	2	0.0307143
chr1-47333740-47334754	5444	0	0
chr1-47416225-47417393	20283	35	0.147602
chr1-47437122-47439846	32428	48	0.124116
chr1-4772292-4772493	3068	19	0.572554
chr1-47994141-47994389	4330	24	0.511181
chr1-47996460-47997929	4429	4	0.0733888
chr1-48471633-48472399	3234	2	0.0490364
chr1-48776520-48777138	4963	0	0
chr1-50047973-50048648	4241	8	0.160404
chr1-50418557-50425799	33333	55	0.140312
chr1-51729357-51730149	3201	0	0
chr1-51878507-51879267	3061	0	0
chr1-52032781-52033833	18068	2	0.0108011
chr1-52368468-52368856	4562	2	0.0337587
chr1-52602209-52602936	4008	0	0
chr1-52632958-52633631	7934	1	0.00851943
chr1-52698017-52698508	3834	0	0
chr1-52726352-52726756	4254	0	0
chr1-52842623-52843505	3968	2	0.0396036
chr1-52920953-52921851	4740	0	0
chr1-52927209-52927973	3915	0	0
chr1-53061993-53063302	4630	4	0.0719761
chr1-53078433-53079011	8445	80	0.851364
chr1-53196638-53197143	4706	2	0.0346562
chr1-53220225-53220719	8633	1	0.00766841
chr1-53276626-53277173	13890	156	0.936397
chr1-53326016-53328156	10232	0	0
chr1-53459519-53460555	12548	135	0.899685
chr1-53737730-53739637	7313	8	0.0906048
chr1-53838086-53838589	4190	1	0.0189138
chr1-54052929-54053626	3435	0	0
chr1-54200149-54200586	7345	1	0.00998027
chr1-54405181-54407327	7027	0	0
chr1-54715673-54716180	3400	0	0
chr1-54781070-54781846	15074	148	0.854028
chr1-54800605-54801385	13142	38	0.260071
chr1-54805993-54806299	4322	37	0.780776
chr1-54886791-54887655	5559	0	0
chr1-54980415-54981173	3660	8	0.191493
chr1-55039388-55040342	5490	4	0.0598139
chr1-55214793-55216035	6606	0	0
chr1-56578430-56579444	3680	2	0.0448093
chr1-56644991-56645564	4302	1	0.0184242
chr1-58576086-58577623	21440	75	0.31238
chr1-5877098-5877332	3846	40	0.893332
chr1-58781790-58785268	16650	4	0.0160889
chr1-59814416-59815376	3394	2	0.0473503
chr1-6051550-6051776	3622	40	0.902618
chr1-6128814-6129060	4120	45	0.937064
chr1-6142059-6142299	3949	22	0.511153
chr1-61654203-61654421	3758	41	0.933931
chr1-61724976-61725270	5976	1	0.0171173
chr1-6179178-6180754	3393	2	0.0495392
chr1-6199119-6199823	3636	1	0.0215169
chr1-6205766-6206718	11501	13	0.0969966
chr1-6208761-6209528	12598	11	0.076069
chr1-6235469-6236201	5855	3	0.0393867
chr1-6245089-6246403	9410	9	0.0783461
chr1-6249104-6250032	15308	20	0.10984
chr1-6253702-6254079	6786	52	0.701972
chr1-62687710-62688678	3313	0	0
chr1-6281077-6281352	3437	27	0.726614
chr1-63316724-63324800	29618	54	0.155105
chr1-63593267-63594242	6141	4	0.0550759
chr1-63773795-63775108	3850	1	0.0194779
chr1-6392960-6394125	5535	0	0
chr1-6418998-6420878	15734	26	0.138557
chr1-6424444-6425267	6661	4	0.0474853
chr1-6440109-6441070	11942	18	0.129082
chr1-6447148-6449126	17999	15	0.0675573
chr1-6451630-6452050	6200	44	0.637036
chr1-6454049-6455985	29630	44	0.128194
chr1-6460525-6461895	12689	124	0.873185
chr1-6470613-6470818	3675	44	0.927373
chr1-6471412-6471676	4410	39	0.769589
chr1-64744600-64745555	5097	0	0
chr1-6485084-6485858	3690	0	0
chr1-6497091-6497812	3116	0	0
chr1-65066588-65068282	6886	1	0.0100221
chr1-65147359-65149215	3214	0	0
chr1-65309334-65310063	4315	3	0.0584152
chr1-65420174-65421021	4281	2	0.0433012
chr1-6554077-6554775	10441	0	0
chr1-6579368-6580301	3245	26	0.707246
chr1-6593338-6593614	4893	46	0.820744
chr1-6599066-6599445	5801	49	0.727411
chr1-6601717-6603784	22293	1	0.00101438
chr1-6612727-6615681	4701	0	0
chr1-6625012-6625780	4171	1	0.0185241
chr1-66930001-66930800	3748	2	0.0412934
chr1-6701236-6702071	3711	0	0
chr1-67053863-67054456	3368	1	0.0239658
chr1-67429453-67431143	5619	2	0.0268533
chr1-67685231-67686587	13321	0	0
chr1-6784254-6786306	5323	1	0.0135294
chr1-68046961-68047322	5571	35	0.563995
chr1-68496601-68497323	4302	0	0
chr1-69567285-69568812	4782	24	0.413891
chr1-69919361-69919587	3401	25	0.639242
chr1-70354051-70355036	8656	0	0
chr1-71046542-71048121	18473	43	0.205333
chr1-74198143-74198351	3044	0	0
chr1-75136314-75137124	4402	14	0.278078
chr1-75724232-75725045	3567	0	0
chr1-75796852-75797218	3714	26	0.609034
chr1-7663341-7665115	24453	157	0.580558
chr1-76867427-76868849	7862	8	0.0837202
chr1-77281689-77282539	3124	0	0
chr1-7770992-7771786	4580	0	0
chr1-7783401-7785044	3892	42	0.951692
chr1-78045894-78046477	6419	2	0.0252813
chr1-7827139-7827416	5836	57	0.839223
chr1-79006597-79006852	4816	36	0.652461
chr1-8317725-8318275	4260	1	0.0179064
chr1-8324328-8324659	5040	26	0.5056
chr1-8325836-8326108	4037	34	0.746379
chr1-8330143-8330740	9310	74	0.734645
chr1-8335284-8335575	3373	33	0.877454
chr1-8343638-8344042	4618	28	0.551531
chr1-8358263-8358490	3995	34	0.752056
chr1-84077464-84078578	7289	1	0.00918718
chr1-84298426-84299223	3231	0	0
chr1-84479250-84479667	4692	0	0
chr1-84505662-84506808	4211	0	0
chr1-84574143-84574661	4614	0	0
chr1-85047827-85048872	3698	1	0.0208919
chr1-85200136-85201967	27395	3	0.00487246
chr1-85259019-85259841	6450	0	0
chr1-85276183-85276852	4418	1	0.0171985
chr1-85464258-85465485	11528	7	0.0515838
chr1-85580680-85581557	8584	7	0.0664158
chr1-86552986-86553493	3642	25	0.619318
chr1-86914480-86915531	3256	0	0
chr1-87331700-87332201	3692	3	0.0660909
chr1-88683933-88685035	4543	2	0.0363564
chr1-88891281-88891708	4087	1	0.0194449
chr1-89994841-89995678	4621	0	0
chr1-9039222-9040454	12026	142	0.973333
chr1-90716541-90718983	11922	29	0.220624
chr1-9128445-9129417	9188	2	0.0168704
chr1-92029811-92030407	4584	2	0.033095
chr1-92080263-92080923	3089	2	0.0609119
chr1-92298617-92299369	4897	0	0
chr1-923591-926252	30294	9	0.020756
chr1-92480310-92487052	24125	170	0.626984
chr1-9264144-9264380	4551	46	0.855508
chr1-9264629-9264957	4377	46	0.817234
chr1-92831942-92832565	3758	0	0
chr1-92960956-92962197	3295	0	0
chr1-93180116-93180914	13421	1	0.00414413
chr1-93447913-93448967	4787	2	0.0339745
chr1-9356068-9356345	5727	49	0.784064
chr1-9367449-9367675	3405	33	0.849064
chr1-93878952-93879266	3049	0	0
chr1-93908814-93909911	4847	1	0.0180938
chr1-940226-942983	18692	5	0.0198586
chr1-94237135-94237788	5312	3	0.0472519
chr1-94247351-94247961	3593	3	0.0677086
chr1-94417970-94418846	4673	0	0
chr1-94541282-94542083	4334	3	0.0606854
chr1-94820047-94820763	5116	2	0.0292774
chr1-94926282-94927560	12286	6	0.0378601
chr1-95072696-95072995	3114	0	0
chr1-95234121-95234586	3799	1	0.019875
chr1-9539292-9540385	4311	2	0.0355303
chr1-9588675-9589459	4919	0	0
chr1-958934-967274	67343	373	0.507882
chr1-9610560-9610810	4379	52	0.984066
chr1-96721547-96722263	4702	1	0.0158839
chr1-970917-971158	3913	16	0.35529
chr1-9715651-9715939	5252	63	0.999745
chr1-9730235-9730646	3366	32	0.799293
chr1-9731101-9731428	3789	37	0.883802
chr1-976047-979425	13872	88	0.574633
chr1-97920634-97921168	3882	0	0
chr1-9822954-9824609	4218	0	0
chr1-98661317-98662155	6032	1	0.0119377
chr1-99004377-99005028	6603	10	0.148238
chr1-99264427-99264779	4270	1	0.0172195
chr1-998008-1002030	21071	2	0.00989332
chr1-9997210-9998050	3328	4	0.100035
chr10-100065205-100065429	3293	33	0.809711
chr10-100229371-100229776	3252	0	0
chr10-100267343-100267733	3089	0	0
chr10-100286386-100286875	4483	0	0
chr10-100346426-100347965	4244	0	0
chr10-100482224-100482802	10081	1	0.0103131
chr10-100529394-100529985	6030	0	0
chr10-100535792-100536153	4344	0	0
chr10-100735360-100735856	4183	4	0.0785338
chr10-100744157-100746389	4261	5	0.102519
chr10-100747726-100749889	3623	3	0.070897
chr10-100826369-100829867	7841	4	0.0419775
chr10-100912611-100913402	5267	0	0
chr10-100986777-100987744	13651	28	0.179351
chr10-100989114-100989331	3748	38	0.874719
chr10-100996950-101000041	3254	1	0.0239337
chr10-101005449-101005691	4238	39	0.784721
chr10-101006565-101006936	7382	70	0.790583
chr10-101018848-101019165	7656	18	0.200698
chr10-101030021-101030237	3736	18	0.428612
chr10-101060732-101063117	10258	6	0.0462014
chr10-101131254-101132274	12286	15	0.103007
chr10-101133904-101135302	6685	8	0.101852
chr10-101136586-101136908	5259	11	0.192424
chr10-101222546-101230435	19948	36	0.154238
chr10-101353767-101354657	8623	0	0
chr10-101694223-101695357	7564	0	0
chr10-101775639-101776748	5603	4	0.0568259
chr10-101782955-101783533	3904	1	0.0269409
chr10-101817638-101818499	5115	0	0
chr10-101843410-101843669	3608	27	0.536448
chr10-102065138-102066021	12102	0	0
chr10-102119877-102120360	3898	0	0
chr10-102132903-102133833	5005	1	0.0153805
chr10-102151940-102152789	3695	0	0
chr10-102230457-102232072	23064	10	0.0338389
chr10-102393973-102395800	7002	1	0.00920697
chr10-102399340-102399779	9473	1	0.00633825
chr10-102410412-102411115	3830	1	0.0206791
chr10-102420722-102422285	22238	7	0.0234669
chr10-102450339-102451228	13533	0	0
chr10-102503920-102504398	4378	2	0.037537
chr10-102642065-102645211	11077	2	0.018613
chr10-102656799-102657408	8510	89	0.93654
chr10-102713643-102714954	6102	0	0
chr10-102854244-102854569	3312	1	0.0248288
chr10-102869282-102869722	5737	4	0.0567839
chr10-102917559-102919555	30059	33	0.093254
chr10-103276872-103278327	20650	40	0.168802
chr10-103350509-103351251	7680	1	0.00896251
chr10-103367824-103368706	13177	1	0.00741775
chr10-103455296-103455703	6377	68	0.888106
chr10-103458210-103458530	6637	82	0.957391
chr10-103473165-103473699	8365	89	0.881108
chr10-103493435-103494671	4124	1	0.019151
chr10-103584417-103585282	16472	111	0.609745
chr10-103602028-103602431	7869	83	0.905933
chr10-103602793-103603070	4919	50	0.848937
chr10-103692581-103693472	3038	0	0
chr10-103854754-103855736	3229	2	0.0603254
chr10-104121692-104122189	3143	0	0
chr10-104232142-104232490	4448	0	0
chr10-104254774-104255329	7622	1	0.00901338
chr10-104274817-104275045	3058	0	0
chr10-104315208-104315610	6326	58	0.817294
chr10-104315802-104316033	4365	45	0.867041
chr10-104639810-104643054	13749	10	0.058519
chr10-1048398-1049654	6306	0	0
chr10-107164023-107165047	10600	22	0.178124
chr10-109923018-109923725	4625	0	0
chr10-11017480-11018794	3879	3	0.0738867
chr10-110207671-110210965	5063	1	0.0149693
chr10-110225806-110227456	4380	0	0
chr10-110497406-110498926	10788	0	0
chr10-110567315-110568430	3716	0	0
chr10-110643196-110644570	5202	5	0.0818243
chr10-111076233-111079545	35077	209	0.533945
chr10-112446847-112447562	3461	1	0.0309711
chr10-112951120-112951608	5619	0	0
chr10-113679249-113680437	7752	0	0
chr10-113854615-113855297	4272	0	0
chr10-114043325-114045709	33531	116	0.308202
chr10-114285996-114286353	6032	60	0.84932
chr10-114403633-114404840	5242	0	0
chr10-11463224-11463767	9865	88	0.79971
chr10-114767766-114768715	3031	1	0.0361315
chr10-114821573-114822675	3031	0	0
chr10-114938135-114938617	5032	1	0.0151429
chr10-115092503-115094335	12100	3	0.016773
chr10-11610836-11611963	10011	1	0.00862013
chr10-116125303-116125518	4003	24	0.540194
chr10-116271068-116274718	5349	5	0.0768873
chr10-116627507-116627965	3075	4	0.109706
chr10-116741358-116743195	4467	1	0.0166669
chr10-117134017-117134921	10543	18	0.148321
chr10-117136453-117138526	9121	31	0.297001
chr10-117240925-117242019	3280	3	0.078507
chr10-117374293-117376121	16944	2	0.00806789
chr10-11742016-11742938	5013	2	0.0356565
chr10-117541811-117545857	14391	21	0.123506
chr10-1184874-1185274	3828	35	0.804333
chr10-118594181-118596309	21308	121	0.518495
chr10-11869556-11870433	20055	205	0.904461
chr10-118754517-118755596	5236	0	0
chr10-119029278-119030869	20497	3	0.0103615
chr10-119042150-119042714	10253	86	0.757915
chr10-119080081-119080968	3999	0	0
chr10-119103899-119104892	4086	0	0
chr10-119165274-119166046	4155	0	0
chr10-119178517-119178906	3867	0	0
chr10-119207871-119208111	3013	1	0.0269035
chr10-119541967-119543657	4552	1	0.0166341
chr10-119596302-119597446	14045	4	0.0226311
chr10-119651055-119652315	5650	1	0.0131814
chr10-119725552-119726619	3837	0	0
chr10-119818018-119818873	3270	27	0.741135
chr10-119872143-119873592	4166	0	0
chr10-119892492-119892995	3550	0	0
chr10-120456748-120457865	3868	3	0.0625067
chr10-12068702-12069300	4710	0	0
chr10-120851167-120851540	3205	1	0.0252381
chr10-12129227-12130039	4805	0	0
chr10-121927458-121928594	8836	0	0
chr10-121974513-121975062	5643	1	0.0129679
chr10-122163336-122164027	3307	1	0.0240354
chr10-122460823-122462724	9766	10	0.084321
chr10-122643143-122643448	4293	37	0.757632
chr10-122818611-122818927	6729	31	0.421787
chr10-122879228-122880277	3057	1	0.0257821
chr10-122953753-122954733	4434	1	0.0168927
chr10-122980277-122980776	6540	0	0
chr10-123008243-123009381	3577	0	0
chr10-123134560-123137850	24427	27	0.090951
chr10-123147768-123151519	19020	17	0.0755992
chr10-123154116-123155210	4360	2	0.0415712
chr10-12348804-12350590	4930	0	0
chr10-123666015-123667126	16391	137	0.756757
chr10-123891305-123891937	6347	13	0.17354
chr10-123991897-123992468	8064	26	0.285048
chr10-124044486-124044863	5647	62	0.926596
chr10-1242089-1242359	3265	33	0.871623
chr10-124447241-124450327	19980	12	0.0479448
chr10-124461675-124462171	4659	1	0.0165807
chr10-124791524-124792241	5382	0	0
chr10-124801593-124802365	3628	1	0.0217031
chr10-124997983-124998323	4020	38	0.825666
chr10-125026535-125026807	4807	37	0.57102
chr10-125027160-125027360	3124	32	0.889082
chr10-125719059-125719997	3604	1	0.022454
chr10-125773662-125774418	12572	85	0.590278
chr10-125895681-125896969	7144	126	0.926076
chr10-126387587-126388913	4529	7	0.130178
chr10-126504743-126504962	3621	17	0.429218
chr10-127175327-127175800	7322	45	0.564761
chr10-127736147-127739102	21363	91	0.372989
chr10-129466685-129467446	5081	0	0
chr10-129958427-129960523	4154	3	0.0584995
chr10-129962906-129973432	13900	17	0.102406
chr10-13001095-13001781	7184	9	0.110742
chr10-130110468-130111622	4050	0	0
chr10-131310931-131312789	8288	9	0.0894183
chr10-131900493-131901844	5466	0	0
chr10-131937896-131938130	3554	39	0.887533
chr10-131981395-131983094	7012	2	0.0219043
chr10-132117092-132117694	7169	54	0.671997
chr10-132140342-132140775	5080	41	0.753751
chr10-132185409-132187996	3158	11	0.306359
chr10-132202540-132202840	3579	20	0.503942
chr10-132227996-132228280	3795	28	0.617623
chr10-132306944-132308918	6072	0	0
chr10-132395864-132397560	5280	0	0
chr10-132404765-132406111	30423	297	0.881875
chr10-132536799-132538191	3344	0	0
chr10-132749063-132749702	3254	35	0.818174
chr10-132783854-132789145	24082	61	0.218935
chr10-132869197-132869413	3597	27	0.671885
chr10-132879348-132879748	5112	22	0.375073
chr10-132919098-132920273	6150	50	0.740097
chr10-132922469-132922750	4556	41	0.774391
chr10-132924715-132925200	4028	33	0.759174
chr10-132942160-132943348	4899	5	0.0848169
chr10-13299378-13300223	3535	0	0
chr10-133070923-133071142	3230	17	0.456921
chr10-133087695-133089115	3860	7	0.153652
chr10-133098473-133098979	3417	16	0.407958
chr10-133105252-133105471	4060	29	0.657308
chr10-133126831-133127371	3245	40	0.913689
chr10-133128422-133129497	22359	206	0.840037
chr10-133160027-133160807	4264	2	0.0385042
chr10-133166799-133167555	3908	26	0.588056
chr10-133182815-133183497	3126	26	0.736803
chr10-133186017-133186327	5432	47	0.762845
chr10-133201200-133201898	8192	58	0.651823
chr10-133207115-133207428	4925	39	0.712327
chr10-133224582-133225002	4058	33	0.737596
chr10-133229718-133231488	26515	42	0.134344
chr10-133235294-133238573	5150	26	0.435755
chr10-133285039-133285726	6856	68	0.905613
chr10-133288162-133288480	3028	45	0.962921
chr10-133308488-133309605	9732	16	0.143253
chr10-133325179-133326213	8053	4	0.038394
chr10-133357142-133358450	6006	2	0.0270513
chr10-133372839-133373677	4115	2	0.0396457
chr10-133378091-133379803	5660	2	0.0257362
chr10-133389598-133389812	3373	0	0
chr10-133393964-133394569	4897	1	0.0147826
chr10-133423184-133425243	11457	18	0.132227
chr10-133457280-133457557	4112	29	0.609125
chr10-133458367-133458640	6836	53	0.703169
chr10-133459497-133460181	17070	122	0.640229
chr10-133465213-133465612	8372	53	0.566829
chr10-133527752-133529057	5397	6	0.09586
chr10-133565380-133566263	3105	28	0.79431
chr10-133568031-133570014	9105	81	0.785207
chr10-13528129-13529395	4945	1	0.014801
chr10-1362465-1364024	24226	229	0.844606
chr10-13656563-13657540	20946	219	0.939407
chr10-14837771-14839042	7598	2	0.0182436
chr10-14878322-14879689	4472	0	0
chr10-14953682-14954432	3905	0	0
chr10-15088388-15088914	4491	0	0
chr10-15167826-15168715	4723	0	0
chr10-15213056-15213288	3777	23	0.538832
chr10-15370421-15371463	5758	0	0
chr10-15719425-15720102	6254	4	0.0510233
chr10-16519606-16521720	13119	4	0.0216496
chr10-17201306-17201788	3156	0	0
chr10-17228432-17230618	14439	3	0.0163517
chr10-17453409-17454722	14310	1	0.00384255
chr10-17616667-17617640	7974	0	0
chr10-18140197-18141291	6426	7	0.0903004
chr10-19815523-19817176	3273	2	0.0511794
chr10-21173200-21174879	4390	5	0.102166
chr10-21494270-21497491	10097	0	0
chr10-21516269-21517701	22368	3	0.00984157
chr10-21533922-21535481	4372	1	0.0178716
chr10-22003046-22003968	5176	1	0.0146033
chr10-22315979-22316703	3686	0	0
chr10-22345072-22345933	7170	21	0.253925
chr10-23191769-23193526	16887	17	0.0865486
chr10-23438908-23440594	23987	6	0.0176016
chr10-24952182-24952852	3783	2	0.0418671
chr10-2501272-2501929	4550	39	0.651305
chr10-25174498-25176710	15824	45	0.244802
chr10-26211679-26212197	4943	12	0.216195
chr10-26215455-26218505	11431	8	0.0563188
chr10-26566978-26567353	8824	89	0.877759
chr10-26697214-26698159	3693	0	0
chr10-27100147-27100693	3994	1	0.0215131
chr10-27155205-27155565	5714	2	0.0309751
chr10-27240290-27241173	7766	2	0.0218688
chr10-27242010-27242434	3288	0	0
chr10-27252369-27252837	6026	2	0.0311419
chr10-27413440-27414189	12457	81	0.57795
chr10-27504121-27504835	4404	0	0
chr10-27741254-27746282	10913	12	0.0966073
chr10-28532261-28534163	9836	1	0.00613974
chr10-28676776-28678337	3649	2	0.045817
chr10-3066459-3069227	31917	5	0.00837568
chr10-3103728-3104014	4784	55	0.98056
chr10-3118697-3118915	3713	36	0.867454
chr10-31318299-31321165	3475	0	0
chr10-3137983-3138386	3989	44	0.896757
chr10-3172107-3173068	6202	0	0
chr10-32055623-32056642	3906	0	0
chr10-32109909-32110168	3657	29	0.713301
chr10-32346290-32347727	5102	0	0
chr10-326993-327219	3388	29	0.784271
chr10-33334193-33337269	22040	17	0.0619899
chr10-34814197-34816315	4731	1	0.0161475
chr10-35336122-35337612	5740	0	0
chr10-35607591-35608324	14564	30	0.177712
chr10-35639383-35642965	31644	48	0.133636
chr10-3781598-3781825	4035	41	0.887141
chr10-3784662-3785934	4526	0	0
chr10-38010563-38011171	4820	0	0
chr10-38729964-38730957	3636	41	0.855704
chr10-413753-414118	3635	25	0.611074
chr10-42149374-42150964	4313	36	0.729608
chr10-42638076-42638702	4185	0	0
chr10-42753076-42755464	8512	12	0.120986
chr10-43076557-43077986	4651	2	0.0355021
chr10-43104791-43105717	7285	5	0.0574654
chr10-43229081-43230165	4005	3	0.0604709
chr10-44293364-44293672	6202	22	0.30697
chr10-44384267-44386943	4974	2	0.0305698
chr10-45373271-45374708	5223	0	0
chr10-45443179-45444231	15863	165	0.887434
chr10-45726969-45727839	5665	0	0
chr10-45971896-45972794	5256	2	0.0287389
chr10-46106178-46106858	5648	4	0.0510526
chr10-46284442-46285143	15654	0	0
chr10-46911236-46911769	3884	23	0.511011
chr10-47300042-47300950	6191	12	0.170692
chr10-47309892-47310694	15179	134	0.77631
chr10-47325394-47325620	4196	25	0.558252
chr10-47349987-47350342	6776	54	0.6891
chr10-47368498-47368756	4260	27	0.563496
chr10-47384165-47384902	4343	0	0
chr10-4825934-4826605	4222	6	0.119391
chr10-48450182-48451158	18078	158	0.764651
chr10-484774-485159	3472	24	0.620354
chr10-48523405-48524593	3371	0	0
chr10-48587-49361	7605	44	0.514057
chr10-49115140-49115690	4755	1	0.0154768
chr10-49131846-49132133	4617	26	0.506422
chr10-49326230-49326659	8593	67	0.668036
chr10-49394944-49398737	3181	10	0.269943
chr10-49609556-49612310	32236	142	0.392487
chr10-49614305-49614620	4160	2	0.039817
chr10-49941467-49942365	6109	0	0
chr10-50067657-50068527	6136	0	0
chr10-50991197-50992005	8632	4	0.0381105
chr10-51073780-51074992	6710	5	0.0597878
chr10-52314230-52315067	7883	0	0
chr10-5412469-5413056	3630	0	0
chr10-5498823-5499552	11086	88	0.709227
chr10-5525160-5525865	10263	89	0.771819
chr10-5641686-5641915	3738	37	0.809519
chr10-5666018-5666835	3638	0	0
chr10-5684493-5685734	4786	0	0
chr10-5812744-5814002	4002	0	0
chr10-58267248-58269481	8675	1	0.00782176
chr10-58334972-58335546	3578	1	0.0221603
chr10-58512741-58513696	5572	3	0.0421832
chr10-5888952-5890674	11700	4	0.0265516
chr10-59176068-59177289	3229	11	0.300137
chr10-5976982-5978171	8982	2	0.0192024
chr10-59905899-59907036	7165	0	0
chr10-60733028-60733618	3651	0	0
chr10-60943550-60944532	8279	5	0.0502253
chr10-6144558-6145892	4807	0	0
chr10-61452738-61453251	3430	1	0.0254002
chr10-6201013-6204494	5205	0	0
chr10-6220685-6220908	4046	41	0.859456
chr10-62268283-62268947	3905	0	0
chr10-62804676-62806058	17904	2	0.00655351
chr10-62813412-62813640	5219	50	0.819531
chr10-62814901-62818923	7726	2	0.0239355
chr10-63465111-63466127	7291	1	0.00961517
chr10-63521111-63522270	3715	0	0
chr10-65053878-65054303	6681	51	0.668168
chr10-67884412-67885420	10148	0	0
chr10-68231137-68231766	10883	2	0.0133387
chr10-68406450-68407585	6677	0	0
chr10-68471640-68472040	4343	0	0
chr10-68527204-68527639	3399	1	0.0230822
chr10-68827161-68828452	4924	2	0.0336411
chr10-688768-690282	4509	6	0.111145
chr10-68900770-68901717	3057	0	0
chr10-68956183-68956738	3619	1	0.0294307
chr10-68988680-68989578	10111	1	0.00662416
chr10-69123908-69124597	4601	1	0.016701
chr10-69180141-69180548	4901	0	0
chr10-69248517-69248722	3413	25	0.661553
chr10-69318191-69319621	4669	0	0
chr10-69451361-69452024	3320	0	0
chr10-69572171-69573636	15063	13	0.0729227
chr10-69801547-69803120	6479	14	0.190084
chr10-70145460-70146919	23969	0	0
chr10-70232659-70233711	4507	0	0
chr10-70255022-70255940	16337	51	0.273126
chr10-70404301-70404817	5477	0	0
chr10-70440310-70441612	4368	1	0.0241224
chr10-70600500-70600825	5456	58	0.837492
chr10-70672487-70672982	3718	5	0.111712
chr10-71212319-71214138	3772	0	0
chr10-71396408-71398174	3329	1	0.024179
chr10-7171881-7172141	7071	71	0.884789
chr10-71773335-71773735	3720	0	0
chr10-71850905-71851390	3361	1	0.024574
chr10-72007399-72008621	23802	216	0.821448
chr10-72087049-72088475	6604	1	0.0159206
chr10-72273410-72274940	11532	1	0.00842533
chr10-72354058-72355034	6171	1	0.0112892
chr10-72692071-72692839	4198	1	0.018247
chr10-73246872-73247426	7453	2	0.0190936
chr10-73252369-73252773	4408	0	0
chr10-73647656-73647948	5642	13	0.194965
chr10-7367597-7367822	4036	49	0.904687
chr10-73732736-73733664	20736	191	0.815033
chr10-73772213-73773059	18035	2	0.00478974
chr10-73781800-73782448	6890	1	0.0105295
chr10-73785507-73786151	4836	0	0
chr10-73839503-73839730	3177	39	0.979196
chr10-73874029-73875038	3463	0	0
chr10-73997727-73998469	5690	2	0.028858
chr10-74176460-74177230	4351	0	0
chr10-75043783-75044099	5933	13	0.190252
chr10-75111298-75111862	3984	0	0
chr10-75210235-75211244	3879	0	0
chr10-75234135-75236195	23881	4	0.0100313
chr10-75395371-75409842	44170	181	0.359479
chr10-75431304-75431813	4745	4	0.072416
chr10-7576415-7576652	3184	22	0.626617
chr10-7579756-7579987	4105	31	0.711458
chr10-7666707-7667140	3359	1	0.0234112
chr10-77636338-77638737	22167	37	0.150435
chr10-7787626-7788554	7136	1	0.00976426
chr10-77925962-77927292	8285	0	0
chr10-78033737-78034194	3642	0	0
chr10-7818299-7819144	8105	0	0
chr10-79347327-79348191	6194	1	0.016829
chr10-79386203-79386441	5129	48	0.835202
chr10-79444697-79446055	6031	0	0
chr10-79981473-79982537	5884	2	0.0274728
chr10-80078604-80079322	5682	0	0
chr10-8009105-8009378	6742	76	0.909901
chr10-8049412-8056366	5706	14	0.213255
chr10-8058422-8058805	8255	63	0.688416
chr10-81874294-81875973	12855	20	0.137569
chr10-84194444-84195547	8287	7	0.0690029
chr10-84237354-84237671	6212	30	0.416816
chr10-8513696-8514139	5921	54	0.81258
chr10-86363168-86367607	7968	4	0.0429192
chr10-86942559-86943565	22545	231	0.927986
chr10-86968283-86968963	3479	0	0
chr10-87094001-87095741	12599	0	0
chr10-87341959-87343261	5968	0	0
chr10-87504614-87505614	13811	2	0.0104194
chr10-87659590-87660270	5767	3	0.0405028
chr10-87862016-87862839	9023	0	0
chr10-87864121-87864328	3059	1	0.0253985
chr10-88990537-88991383	6302	1	0.01136
chr10-89414649-89415409	3912	0	0
chr10-89644481-89645291	14875	1	0.00345805
chr10-90857064-90858277	14985	31	0.186943
chr10-91409731-91410816	3678	1	0.0206432
chr10-91798214-91798942	5747	2	0.0310368
chr10-91908246-91909014	15869	4	0.0174021
chr10-91923674-91924082	3077	0	0
chr10-92239375-92240244	18933	48	0.219347
chr10-92290667-92291655	3835	2	0.0426773
chr10-92573491-92574710	4605	1	0.0161392
chr10-92688937-92690722	9658	4	0.0329487
chr10-92692444-92692671	3238	2	0.0508675
chr10-92848281-92849282	3702	0	0
chr10-93060270-93063495	15944	41	0.225731
chr10-93065790-93066563	7840	12	0.129934
chr10-93068346-93069283	7866	7	0.0753409
chr10-93073516-93075499	22055	15	0.0538687
chr10-93566473-93567351	12307	26	0.183809
chr10-93600633-93601630	9072	20	0.203143
chr10-93893885-93894424	5696	1	0.0128242
chr10-94402267-94403570	19577	2	0.00586477
chr10-94545360-94546136	3903	0	0
chr10-95290429-95291367	5045	0	0
chr10-95693722-95694256	5612	3	0.0452077
chr10-96043115-96044505	5494	1	0.0139296
chr10-96384543-96384756	3495	27	0.68838
chr10-96512451-96514182	5663	0	0
chr10-96586293-96587307	6386	0	0
chr10-96720276-96720730	3954	0	0
chr10-96750462-96750670	4181	50	0.969524
chr10-96831951-96833516	9053	1	0.00701431
chr10-97043309-97043677	3771	33	0.717256
chr10-97185306-97186482	6133	1	0.0123104
chr10-97292178-97292733	3074	0	0
chr10-97319055-97321291	20302	3	0.01014
chr10-97333650-97335198	18055	4	0.0148545
chr10-97401058-97401359	4339	0	0
chr10-97426022-97426537	7890	1	0.0084611
chr10-97445720-97446517	4898	0	0
chr10-97498184-97499763	9085	1	0.0113654
chr10-97570204-97570447	4942	49	0.883393
chr10-97578233-97578484	5436	39	0.643064
chr10-97633030-97633618	4894	0	0
chr10-97640507-97641225	10454	1	0.00618138
chr10-97713328-97714907	8906	0	0
chr10-97771407-97772211	9510	6	0.0499158
chr10-97849669-97850359	3703	4	0.0893649
chr10-98029858-98031391	5069	2	0.0322334
chr10-987851-988675	3223	0	0
chr10-99232376-99232930	3066	4	0.116539
chr10-99329547-99330898	25063	62	0.216122
chr10-99533259-99533481	3599	0	0
chr10-99534687-99537946	17793	10	0.0461543
chr10-99619952-99621688	6387	1	0.0105015
chr10-99731924-99732597	7571	0	0
chr11-1007922-1008343	3961	48	0.975993
chr11-1009404-1009649	3351	36	0.818134
chr11-101127300-101129043	30175	19	0.0500994
chr11-101582627-101583953	5880	23	0.355409
chr11-101914864-101915397	3119	0	0
chr11-102047343-102047762	3197	2	0.0505153
chr11-102109902-102111599	8980	1	0.0111704
chr11-1024004-1024492	3099	33	0.845244
chr11-102451799-102453031	4139	0	0
chr11-1024747-1025359	11418	82	0.660205
chr11-1029084-1029390	5030	29	0.517172
chr11-10293733-10294386	3489	0	0
chr11-10305467-10308284	14076	7	0.0388184
chr11-1031752-1032001	5409	49	0.788605
chr11-1036421-1036827	3073	15	0.42742
chr11-104036678-104037262	7701	67	0.793842
chr11-10450454-10451187	3738	0	0
chr11-1056332-1056741	7910	75	0.817625
chr11-106077371-106078089	4190	1	0.0187045
chr11-107017598-107019477	7419	3	0.0299986
chr11-10750947-10751542	3205	0	0
chr11-107858224-107858860	3432	0	0
chr11-107928419-107929254	6632	0	0
chr11-108008775-108009672	3684	0	0
chr11-108121278-108122004	4564	1	0.0192389
chr11-108497772-108498680	8821	2	0.0175796
chr11-1085139-1085362	3343	19	0.517773
chr11-108664858-108665469	4158	1	0.0190122
chr11-109422794-109423692	8680	14	0.138681
chr11-109423940-109424257	4822	14	0.261407
chr11-110092515-110093951	7150	0	0
chr11-1102365-1102611	3844	31	0.7427
chr11-110429851-110430610	5533	0	0
chr11-110711117-110713160	7371	5	0.0542205
chr11-111514613-111514987	3522	13	0.323189
chr11-111540208-111541474	4752	10	0.183424
chr11-111602000-111603215	4848	0	0
chr11-111765871-111766490	3739	2	0.0442226
chr11-111878847-111879354	5492	0	0
chr11-112024853-112025723	6578	2	0.0242696
chr11-112086629-112086957	4588	1	0.0170406
chr11-112226300-112226824	4828	1	0.0156538
chr11-113387722-113388099	4778	26	0.488085
chr11-113875095-113875971	3938	0	0
chr11-114400078-114400968	10231	0	0
chr11-114439280-114439864	4480	1	0.023668
chr11-115502857-115505163	3913	6	0.128477
chr11-1161860-1162244	6766	52	0.634111
chr11-11620575-11622272	4127	0	0
chr11-116772594-116773176	6025	0	0
chr11-116787696-116788179	5739	2	0.0259443
chr11-116790319-116790694	7232	73	0.86627
chr11-116821234-116821644	7810	75	0.827755
chr11-116835766-116836194	6678	4	0.0511812
chr11-117097823-117098796	7470	1	0.00950924
chr11-117315629-117316263	4203	0	0
chr11-117481977-117482246	4099	33	0.738315
chr11-117518472-117518756	6280	42	0.603441
chr11-117780502-117780714	4560	44	0.833089
chr11-117795920-117797426	6013	5	0.0692894
chr11-1178473-1178702	4261	47	0.85589
chr11-1178999-1179340	4776	48	0.791726
chr11-117985924-117986583	3783	0	0
chr11-1181042-1181375	4880	51	0.833108
chr11-1182029-1182495	6550	53	0.716023
chr11-118401547-118401831	3556	2	0.0445624
chr11-11841726-11842471	3765	0	0
chr11-118434708-118436990	10619	1	0.00780405
chr11-118530521-118531354	7675	1	0.00855846
chr11-118572302-118572916	3107	0	0
chr11-118607593-118611181	3361	1	0.0236415
chr11-118997932-118998494	5254	2	0.0311007
chr11-119018169-119019405	11863	3	0.0210789
chr11-119067483-119068104	5031	1	0.0166043
chr11-119094308-119095754	11306	0	0
chr11-119107169-119108075	7341	0	0
chr11-119205932-119206844	6522	0	0
chr11-119316238-119317436	3946	0	0
chr11-119339581-119340948	14433	40	0.259487
chr11-119356387-119357048	3694	0	0
chr11-119363771-119364504	3093	6	0.163725
chr11-119381421-119381854	3439	1	0.0236725
chr11-1194150-1195241	14475	100	0.630747
chr11-119664850-119665282	8580	55	0.588403
chr11-119727673-119729593	4148	0	0
chr11-1200346-1200637	4333	38	0.764626
chr11-12008191-12009294	5168	6	0.097837
chr11-120137339-120138002	11640	106	0.80778
chr11-120210780-120211637	5317	0	0
chr11-120986017-120986465	6002	0	0
chr11-121127678-121128177	8174	63	0.708836
chr11-121157864-121158218	7996	81	0.865135
chr11-121451830-121452593	6491	1	0.0105311
chr11-122655571-122656771	4447	1	0.0174211
chr11-1226601-1226910	5811	57	0.8759
chr11-122976787-122977900	5287	1	0.0141752
chr11-1230917-1231148	3038	14	0.412184
chr11-123194719-123196278	4205	5	0.106142
chr11-1232674-1233264	8935	62	0.642577
chr11-123430342-123431121	7185	0	0
chr11-123577386-123577674	4474	38	0.753718
chr11-12377611-12378316	4540	7	0.129541
chr11-1240854-1241368	8307	63	0.679101
chr11-124673489-124674150	3442	1	0.0227293
chr11-124739896-124740575	3103	0	0
chr11-124745494-124745748	5948	66	0.908946
chr11-124799482-124800623	18548	1	0.00224596
chr11-124865174-124866569	3456	5	0.122128
chr11-124868817-124869115	7606	5	0.0545786
chr11-124876014-124876877	7878	7	0.0730335
chr11-124920919-124921458	9535	28	0.253502
chr11-125062835-125063761	4258	0	0
chr11-1252365-1252631	3094	33	0.873639
chr11-125495242-125496423	6076	0	0
chr11-125625339-125625971	5810	1	0.0121375
chr11-125904125-125904689	5292	22	0.380544
chr11-126211475-126212133	3676	1	0.0216418
chr11-126268465-126269271	6364	0	0
chr11-126282828-126283505	6284	0	0
chr11-127000331-127000656	4128	6	0.127539
chr11-1276780-1277246	4805	56	0.924022
chr11-128521818-128522716	3492	0	0
chr11-128692777-128695170	4279	0	0
chr11-1290122-1290389	3702	38	0.810202
chr11-129372635-129376500	4258	2	0.0414256
chr11-129436765-129436987	4329	32	0.644819
chr11-129815843-129816316	3974	10	0.231896
chr11-130032917-130033317	7579	73	0.868065
chr11-130069042-130071020	8215	1	0.00843949
chr11-13008784-13011037	27728	63	0.198559
chr11-130159847-130160367	3687	1	0.0212581
chr11-130189649-130189855	3221	23	0.604299
chr11-130208279-130208772	4753	50	0.889731
chr11-130209305-130209746	6016	59	0.802884
chr11-130427507-130428622	14357	5	0.0250647
chr11-130448340-130450303	18302	23	0.105156
chr11-130473062-130473757	10301	77	0.673292
chr11-130546906-130547203	4064	26	0.585193
chr11-1309161-1310268	4378	0	0
chr11-131910459-131911638	5806	6	0.0862245
chr11-133864807-133865269	5401	48	0.803322
chr11-133919378-133921373	25025	198	0.706493
chr11-133955443-133957562	4050	2	0.0381708
chr11-134068956-134069786	3660	0	0
chr11-134223671-134225597	9653	1	0.00830814
chr11-134253316-134254102	6350	0	0
chr11-134275666-134277286	7119	9	0.105332
chr11-134331891-134332513	3916	7	0.155902
chr11-134383567-134384257	15115	88	0.519911
chr11-1388890-1391116	7310	8	0.0961182
chr11-13962520-13964802	7752	18	0.197945
chr11-14259196-14259618	5292	20	0.342192
chr11-14358263-14359306	4319	1	0.0179579
chr11-1443066-1443694	10001	87	0.783925
chr11-1445075-1445980	12453	118	0.780726
chr11-14520055-14520679	3192	0	0
chr11-1460549-1461414	7759	61	0.700999
chr11-14643508-14644657	11576	3	0.0177434
chr11-14644786-14645128	3546	0	0
chr11-1469968-1470295	3118	34	0.932751
chr11-14891355-14892225	11692	1	0.00545393
chr11-1556476-1557861	27017	171	0.554342
chr11-1571269-1573148	3289	0	0
chr11-17013297-17014857	10086	1	0.00591369
chr11-17077293-17077959	5482	0	0
chr11-17387906-17388145	3427	23	0.601762
chr11-17475917-17477079	4476	1	0.0166665
chr11-1747750-1749482	8013	70	0.788111
chr11-1753359-1753810	4668	44	0.825022
chr11-17544220-17544505	3248	10	0.265751
chr11-1763576-1764323	4961	1	0.0150204
chr11-17719243-17722232	26388	73	0.23838
chr11-17734510-17736739	17375	76	0.39267
chr11-17771730-17772412	11978	97	0.742638
chr11-17779480-17779730	3925	39	0.854238
chr11-18012583-18013721	4444	1	0.0169691
chr11-18105745-18106164	4423	1	0.017225
chr11-18189338-18189658	4325	32	0.649365
chr11-18526514-18527082	3386	0	0
chr11-18588464-18588916	3262	0	0
chr11-18698535-18699274	3334	0	0
chr11-18705774-18706180	6049	6	0.0902731
chr11-18721144-18721966	4910	2	0.04369
chr11-19116980-19117669	3213	0	0
chr11-1926302-1926728	4724	35	0.673673
chr11-19712391-19713791	3675	0	0
chr11-20156063-20157278	11809	14	0.100108
chr11-20159655-20160779	8197	20	0.216748
chr11-20363616-20364127	3407	0	0
chr11-20387210-20388235	8404	1	0.00816468
chr11-20601175-20601853	9880	24	0.208367
chr11-206976-209225	8345	2	0.020315
chr11-2137722-2141254	3806	5	0.110768
chr11-2166259-2167015	11538	61	0.488041
chr11-22341317-22341831	4655	5	0.0894174
chr11-22625161-22625895	10639	1	0.00582618
chr11-2268875-2271702	15822	37	0.200346
chr11-22829220-22829838	5893	0	0
chr11-23405407-23405803	5434	39	0.661447
chr11-235919-237290	9714	1	0.00714732
chr11-2376994-2378368	3867	0	0
chr11-2396421-2396763	3700	34	0.70892
chr11-2414066-2415421	16420	130	0.709347
chr11-2420841-2421172	3576	20	0.514123
chr11-2444908-2445588	8507	4	0.0360622
chr11-24496679-24497192	6289	14	0.194526
chr11-27363073-27363323	3005	1	0.0262992
chr11-27471695-27472810	4672	0	0
chr11-27506317-27506970	3161	0	0
chr11-279073-281700	43792	101	0.201709
chr11-2883794-2885894	31094	29	0.0770754
chr11-289772-290010	3922	29	0.69935
chr11-2909060-2909863	9551	59	0.536499
chr11-2928559-2930526	14140	14	0.0841086
chr11-304080-304379	4288	31	0.615009
chr11-3056913-3057754	4916	0	0
chr11-3093531-3093798	3481	15	0.397787
chr11-31509585-31509954	3466	0	0
chr11-31815871-31818265	3067	11	0.318254
chr11-32090849-32091731	5744	0	0
chr11-3217988-3218758	14469	101	0.620878
chr11-3227886-3228608	10886	74	0.609688
chr11-32433329-32435765	13632	18	0.116354
chr11-32583638-32584183	3915	0	0
chr11-32829615-32830405	10744	8	0.0602812
chr11-32892444-32893968	3655	0	0
chr11-33015661-33016371	3786	1	0.0208243
chr11-33375947-33376948	4851	0	0
chr11-33700168-33700954	9846	19	0.171197
chr11-3378770-3379189	3512	0	0
chr11-33868812-33869949	8075	0	0
chr11-34051440-34053156	5974	0	0
chr11-3413804-3414009	3375	26	0.664088
chr11-3422016-3423201	5114	0	0
chr11-34356683-34358176	18466	3	0.0112881
chr11-34438619-34439310	3520	0	0
chr11-34915782-34916833	10154	1	0.00615855
chr11-35138829-35139453	3506	5	0.120856
chr11-35418875-35420335	6951	9	0.108221
chr11-35618082-35619937	24539	6	0.0176973
chr11-35662757-35663354	5975	5	0.069064
chr11-3591421-3591655	3992	25	0.5561
chr11-35944067-35944904	3452	0	0
chr11-3667146-3667777	15968	167	0.929274
chr11-369452-370214	3060	2	0.0518274
chr11-375664-377380	33146	270	0.729407
chr11-379296-380768	23848	224	0.842197
chr11-3797218-3798077	5208	0	0
chr11-394258-394619	6018	53	0.766108
chr11-396686-398880	13504	137	0.882305
chr11-400097-403400	18414	172	0.834781
chr11-406492-407871	15913	52	0.288767
chr11-4094460-4095259	3628	2	0.0451757
chr11-420266-421747	16296	169	0.916398
chr11-424956-425286	4006	25	0.580147
chr11-43311890-43312337	3770	0	0
chr11-43358692-43359490	4664	0	0
chr11-43522286-43522536	3618	43	0.876048
chr11-43680467-43681047	4623	1	0.0188307
chr11-43942077-43944498	21614	4	0.0114146
chr11-44308993-44310123	14117	13	0.0776626
chr11-449962-451178	6510	0	0
chr11-45285891-45286424	4866	7	0.120313
chr11-45649648-45650862	27288	281	0.886942
chr11-45847192-45847862	10696	1	0.00576856
chr11-45885456-45886258	3946	0	0
chr11-45899837-45900616	5718	4	0.0626753
chr11-45902430-45903176	11684	88	0.667253
chr11-45921963-45923222	6948	4	0.0454645
chr11-46143101-46143301	3417	28	0.727737
chr11-46277862-46278665	3829	7	0.155117
chr11-46332542-46333640	6329	3	0.0367528
chr11-46347101-46348110	6553	14	0.180674
chr11-46366356-46366985	10941	116	0.903845
chr11-46380319-46382523	7343	2	0.021104
chr11-46385355-46385891	9173	92	0.78442
chr11-46705196-46705487	5620	72	0.92762
chr11-46917808-46918748	3629	0	0
chr11-46936620-46936842	3345	0	0
chr11-47176477-47177334	6507	0	0
chr11-47248684-47249082	4921	0	0
chr11-47355101-47355797	7511	83	0.911889
chr11-47426154-47426706	3246	0	0
chr11-47565297-47566056	7899	0	0
chr11-47578578-47579375	12452	5	0.0305768
chr11-47589587-47590875	28908	311	0.953936
chr11-47642026-47642779	3651	1	0.0217538
chr11-47766649-47767470	9230	1	0.00679719
chr11-47848242-47848804	5436	0	0
chr11-47980053-47981618	8181	0	0
chr11-48900174-48901190	7433	56	0.659664
chr11-489248-490115	11909	142	0.978467
chr11-49048169-49049170	7291	42	0.510928
chr11-49208166-49208488	5426	18	0.285198
chr11-494854-495156	3662	43	0.990473
chr11-49851566-49852600	7778	75	0.835235
chr11-49891768-49892783	8732	53	0.538069
chr11-49893392-49893820	3706	29	0.705482
chr11-554714-556560	30622	16	0.0408963
chr11-55872593-55873609	10537	75	0.628448
chr11-55874235-55874644	4029	20	0.450143
chr11-560383-561669	8190	1	0.00789158
chr11-57335368-57335956	4238	0	0
chr11-57459364-57461234	3787	0	0
chr11-57476209-57476990	14776	2	0.00915666
chr11-57514199-57515832	4095	2	0.0405893
chr11-57567576-57568013	3153	1	0.0344526
chr11-57712015-57712836	10030	1	0.00678751
chr11-57741259-57742097	8007	0	0
chr11-58578201-58579848	7667	0	0
chr11-59171574-59172835	6247	0	0
chr11-59615440-59615937	5907	0	0
chr11-59754953-59755654	3015	1	0.0259821
chr11-59810618-59810906	3003	0	0
chr11-59898107-59898384	4059	38	0.811466
chr11-60767438-60767665	3208	17	0.480053
chr11-60841920-60842313	4665	0	0
chr11-60852452-60853638	24244	241	0.896364
chr11-60906126-60906712	5151	1	0.0208494
chr11-60924314-60925060	6067	1	0.0175805
chr11-60934211-60934747	8040	72	0.803739
chr11-60950957-60951521	11284	2	0.01411
chr11-61007565-61008835	13772	45	0.289524
chr11-61294172-61295591	4696	0	0
chr11-61332602-61333500	3840	1	0.0209275
chr11-61339239-61339455	3285	40	0.967662
chr11-61429450-61430225	9766	0	0
chr11-614761-616068	14702	95	0.572091
chr11-61508354-61509857	19058	12	0.0503346
chr11-61580337-61581566	6886	2	0.0226974
chr11-61720661-61720885	3095	25	0.731435
chr11-617227-617797	11768	128	0.914049
chr11-61743570-61744112	9096	63	0.609505
chr11-61752270-61752882	3977	2	0.0419525
chr11-61777256-61778091	8485	26	0.270572
chr11-61792436-61793077	3144	0	0
chr11-61815102-61817256	14580	2	0.00973189
chr11-61827525-61829238	4579	0	0
chr11-61891098-61892120	13906	1	0.0058682
chr11-61917120-61917744	4978	7	0.117633
chr11-61955273-61956011	6612	8	0.101371
chr11-61967143-61968460	5242	0	0
chr11-62337308-62338164	4642	2	0.0351586
chr11-62371150-62371401	4002	44	0.898397
chr11-6240111-6240505	6788	65	0.853191
chr11-624781-625053	3058	25	0.641401
chr11-62591342-62592202	5202	1	0.0147947
chr11-6259847-6260077	3398	8	0.207423
chr11-62600983-62603019	19277	91	0.426904
chr11-62612167-62613084	5279	1	0.0145307
chr11-62621732-62622319	3948	0	0
chr11-62646161-62646821	4156	0	0
chr11-62653073-62653452	4851	1	0.0152597
chr11-62664848-62665945	14953	5	0.0242487
chr11-62671576-62672331	6454	2	0.0248957
chr11-626729-628037	8078	28	0.310594
chr11-62678567-62679141	7310	0	0
chr11-62687602-62688396	13667	92	0.602252
chr11-6270109-6270328	4947	38	0.674621
chr11-6271027-6271463	8869	71	0.728366
chr11-62726523-62727655	15240	1	0.00366154
chr11-62761432-62761956	4844	1	0.0220989
chr11-62786595-62787790	23114	3	0.0066186
chr11-62791628-62792083	7928	2	0.0199808
chr11-62805092-62805677	4961	0	0
chr11-62831208-62832592	6640	0	0
chr11-62839070-62839648	8170	0	0
chr11-62855888-62856405	3092	0	0
chr11-62880766-62881689	9249	1	0.00888408
chr11-6319216-6319509	6136	38	0.544107
chr11-6320107-6320679	7798	9	0.0958835
chr11-63490907-63491332	4093	0	0
chr11-63613672-63614512	3301	0	0
chr11-636436-640628	33997	62	0.154781
chr11-63670830-63671842	4126	0	0
chr11-63681233-63681914	4929	0	0
chr11-63762417-63764418	22009	238	0.957977
chr11-63764982-63765228	4111	38	0.805949
chr11-63813050-63814268	3798	0	0
chr11-6390117-6390683	3969	0	0
chr11-63908848-63909325	6488	60	0.839472
chr11-63916272-63917067	4212	2	0.0389216
chr11-63938558-63939396	4237	0	0
chr11-63974429-63975142	3798	0	0
chr11-63985943-63986982	6473	0	0
chr11-63998587-64001194	19608	87	0.401017
chr11-64116384-64117710	20248	182	0.808633
chr11-64118110-64118316	3111	42	0.875216
chr11-64165519-64166598	8134	1	0.00831068
chr11-64185206-64186756	7547	1	0.00954289
chr11-6418634-6419502	4830	0	0
chr11-64207358-64207576	3119	1	0.0255605
chr11-64234154-64235240	7720	2	0.0177392
chr11-64246301-64247869	5967	1	0.0123968
chr11-64251442-64251905	4374	0	0
chr11-64258442-64259264	10892	105	0.847439
chr11-64267389-64267594	3784	40	0.92169
chr11-64269404-64270502	5053	2	0.0320743
chr11-64271493-64271834	4836	3	0.0499391
chr11-64284581-64284875	3491	0	0
chr11-64287696-64287916	3889	34	0.76642
chr11-64299286-64301269	21213	7	0.0237336
chr11-64317175-64318585	12497	4	0.0232701
chr11-64342351-64342756	6671	23	0.299388
chr11-64358959-64359488	5424	2	0.0302302
chr11-64368344-64368909	8440	78	0.812192
chr11-64369402-64370715	22026	218	0.892442
chr11-64562049-64562353	4480	22	0.425357
chr11-6456374-6456948	12383	140	0.899734
chr11-64607347-64608294	14276	130	0.816325
[truncated: 10,595 more rows]

## Sheet: WGS_NA12878_Rep1
region	total	error	Methylation
chr1-100037927-100038848	20039	1	0.00213526
chr1-100132575-100133198	8562	2	0.0142201
chr1-100213211-100213542	7392	91	0.937767
chr1-100266077-100266443	6246	2	0.0245523
chr1-10032475-10033346	16584	0	0
chr1-100352154-100353343	16478	3	0.0112602
chr1-100539013-100540329	22642	20	0.0670933
chr1-100895033-100895276	3576	0	0
chr1-100895994-100896252	5504	1	0.0179593
chr1-101025762-101026124	5133	0	0
chr1-101236230-101236512	4559	0	0
chr1-101236890-101237189	5519	0	0
chr1-1013950-1014471	7065	16	0.178559
chr1-1019389-1020963	30964	1	0.00098857
chr1-10209958-10211248	27807	2	0.00450613
chr1-1032587-1034858	38864	83	0.159003
chr1-103525471-103526291	7447	0	0
chr1-10398492-10399940	27259	1	0.00131929
chr1-1040117-1044925	65722	532	0.643869
chr1-10430144-10431015	16304	12	0.0566906
chr1-1045689-1046020	5722	57	0.752732
chr1-1046773-1047131	5354	66	0.863721
chr1-10472121-10472743	10415	0	0
chr1-10474862-10475115	4449	0	0
chr1-1047795-1048232	6323	43	0.521426
chr1-1054895-1055314	5250	53	0.783817
chr1-1056299-1056699	3820	41	0.930959
chr1-1059057-1059923	20097	1	0.00205909
chr1-106080772-106081232	6233	37	0.459883
chr1-10638243-10640041	33757	234	0.53957
chr1-1064299-1064531	4183	1	0.0179608
chr1-10647754-10648083	5193	52	0.777499
chr1-10653782-10654146	5299	61	0.881443
chr1-10654345-10654651	3861	31	0.615695
chr1-10659811-10660524	8917	96	0.831661
chr1-10665131-10665560	7480	51	0.525915
chr1-1067284-1069938	42472	213	0.385708
chr1-10693717-10695464	30336	14	0.0318778
chr1-10697835-10698195	5319	67	0.821382
chr1-10704393-10704868	9373	79	0.645558
chr1-107056584-107057788	19508	4	0.0128566
chr1-107140268-107140509	3536	0	0
chr1-107141045-107141841	14135	0	0
chr1-1071837-1072253	7719	50	0.505669
chr1-107480611-107480820	3249	2	0.0441343
chr1-10793838-10796907	48122	14	0.0211495
chr1-107964630-107965419	14379	5	0.0243632
chr1-1081484-1082059	8273	60	0.575688
chr1-108199779-108200579	14855	2	0.00913763
chr1-1082720-1083010	6557	64	0.722784
chr1-10835839-10836060	3403	5	0.105024
chr1-1084439-1084646	3318	34	0.795516
chr1-108559917-108560590	11799	0	0
chr1-108660972-108661756	14222	2	0.00795088
chr1-10866899-10867422	8744	0	0
chr1-108692167-108692539	6056	0	0
chr1-108746397-108747200	12731	1	0.00497504
chr1-1087764-1087967	3407	28	0.641429
chr1-1088696-1089234	8809	94	0.834685
chr1-108876845-108877416	12910	2	0.00874902
chr1-10888468-10889109	13192	15	0.0845741
chr1-108963060-108963592	10893	1	0.00575971
chr1-109041234-109042224	16755	0	0
chr1-109075958-109076210	3777	0	0
chr1-109090567-109091010	7805	1	0.00939325
chr1-1090998-1091245	4283	42	0.761849
chr1-109100042-109100762	13189	3	0.016716
chr1-1092130-1092350	4224	36	0.624136
chr1-109213843-109214476	9964	1	0.00634435
chr1-109249324-109250101	15154	1	0.00300189
chr1-109258433-109259078	12779	133	0.821397
chr1-109283089-109283585	8332	0	0
chr1-109397453-109398272	18000	1	0.00283257
chr1-109426027-109426948	11006	1	0.00503179
chr1-109466341-109467165	15919	27	0.123388
chr1-109483832-109484281	10271	1	0.00632771
chr1-109493924-109494321	6555	1	0.0101257
chr1-109509333-109509883	12836	3	0.015218
chr1-109548418-109548968	8990	3	0.0248097
chr1-109619843-109620094	4288	0	0
chr1-109655920-109656505	8864	0	0
chr1-109667960-109668334	4639	1	0.0140841
chr1-109687617-109687992	3312	1	0.0202103
chr1-109739730-109740684	17907	23	0.095255
chr1-109910522-109911267	12788	3	0.014299
chr1-109984627-109985404	13605	1	0.00387795
chr1-110034782-110035320	8324	0	0
chr1-110067644-110070681	43058	35	0.0595963
chr1-110083907-110084862	18128	1	0.00272746
chr1-11012341-11013188	16030	2	0.00667172
chr1-110130189-110130717	7219	5	0.054245
chr1-110150367-110151642	22803	41	0.137231
chr1-110209635-110212172	49489	38	0.0547109
chr1-110223044-110223390	4819	45	0.769647
chr1-110338321-110340178	26799	0	0
chr1-110407271-110407918	10448	2	0.0144021
chr1-110555445-110555740	7205	4	0.0413935
chr1-11058974-11060577	26628	11	0.0280817
chr1-110606362-110607564	21129	10	0.0333283
chr1-110673623-110675675	33698	88	0.193864
chr1-110963260-110964385	14337	1	0.00423819
chr1-11099331-11100079	13579	2	0.00930627
chr1-1110665-1110960	4191	50	0.822267
chr1-111139606-111140681	16648	4	0.0164829
chr1-111203692-111204681	17396	3	0.00974816
chr1-111270790-111271231	6199	17	0.211827
chr1-111346517-111346917	5975	3	0.0386908
chr1-111448683-111449580	12266	0	0
chr1-1115136-1117065	34959	18	0.0350866
chr1-111515563-111515968	5854	0	0
chr1-111619583-111620215	13076	0	0
chr1-111738431-111740655	31402	10	0.0218004
chr1-111755420-111756370	16086	1	0.00290802
chr1-111981847-111982763	14879	147	0.774403
chr1-111988938-111991151	39340	23	0.0404133
chr1-112395874-112396194	4325	0	0
chr1-112466223-112466532	4432	1	0.0172229
chr1-112501789-112502370	10379	3	0.0216894
chr1-112508192-112509679	26766	35	0.0975023
chr1-112618970-112619949	14187	2	0.00819913
chr1-11262202-11262979	11568	0	0
chr1-112674854-112675475	12215	1	0.00477209
chr1-112706721-112707576	16341	2	0.00623713
chr1-112714264-112715438	20717	1	0.0029162
chr1-112722952-112723165	3398	14	0.318656
chr1-11273203-11273490	4733	0	0
chr1-112743705-112744550	16107	51	0.242648
chr1-112849521-112850174	12681	8	0.049942
chr1-112955745-112956703	17439	0	0
chr1-113072970-113073638	10099	0	0
chr1-113389959-113391448	29680	9	0.0186388
chr1-1136990-1137467	10527	0	0
chr1-113758893-113759650	13978	2	0.00893613
chr1-113811752-113812678	16712	2	0.00596914
chr1-113904833-113905402	10976	0	0
chr1-113929344-113930277	15954	1	0.00270975
chr1-114152515-114154050	26636	35	0.0982382
chr1-114154265-114154563	4108	13	0.22942
chr1-114510440-114511643	23525	0	0
chr1-114669619-114670364	11970	3	0.0202071
chr1-114780455-114780841	5047	1	0.0130466
chr1-11478613-11480554	35035	47	0.101819
chr1-114854828-114855321	5265	41	0.59146
chr1-11501310-11502099	13999	132	0.717825
chr1-115089230-115089963	13841	2	0.0101652
chr1-11529782-11529987	3970	27	0.515727
chr1-115337547-115338711	19136	42	0.164417
chr1-11536326-11536565	4391	29	0.519285
chr1-115642095-115642940	15228	4	0.0176544
chr1-1157832-1158096	5656	0	0
chr1-115828190-115829006	13529	34	0.188494
chr1-115837739-115839743	36498	47	0.0944307
chr1-115976526-115976916	7511	0	0
chr1-116152044-116152362	7251	0	0
chr1-116167537-116167925	4653	27	0.457512
chr1-116168217-116168639	7094	0	0
chr1-1162664-1165204	35963	265	0.570372
chr1-116372670-116374191	28919	1	0.00118802
chr1-116418561-116418920	7392	1	0.0132769
chr1-11648711-11649220	7772	36	0.358522
chr1-11650403-11650731	5776	3	0.0377627
chr1-116534421-116534677	4963	45	0.654285
chr1-11654161-11655249	18292	6	0.0226419
chr1-116570339-116571261	16189	1	0.0033611
chr1-11664057-11664828	14546	3	0.0117166
chr1-116667203-116667999	15404	8	0.0352457
chr1-11680343-11681660	24672	16	0.0558117
chr1-11690645-11692594	33088	19	0.0408628
chr1-116909582-116910830	21430	31	0.109589
chr1-116944628-116945023	7769	71	0.701791
chr1-117059767-117060648	11224	0	0
chr1-117121648-117122526	15385	14	0.0636136
chr1-11719510-11719959	6137	1	0.0119622
chr1-11735919-11736206	5096	1	0.0127283
chr1-117366553-117367823	24602	1	0.00165789
chr1-1173935-1174765	9223	55	0.465828
chr1-117605337-117607046	23220	1	0.00185146
chr1-11762083-11762306	4604	2	0.028793
chr1-117929218-117930097	12916	1	0.00512288
chr1-11805406-11806509	18421	0	0
chr1-118185194-118185474	3612	10	0.242004
chr1-11838337-11838675	5305	50	0.747365
chr1-11859059-11859498	7378	9	0.0888747
chr1-118979763-118980015	6883	18	0.193054
chr1-118984160-118984569	4908	14	0.220603
chr1-118987197-118988089	14532	21	0.10658
chr1-118993044-118993364	6581	28	0.336243
chr1-119000434-119000831	5149	8	0.115749
chr1-119001199-119001716	6588	2	0.0203591
chr1-119006522-119008697	27767	67	0.181764
chr1-119140252-119140788	6693	0	0
chr1-11925587-11926078	4142	0	0
chr1-119327604-119327912	3953	4	0.0818298
chr1-11934693-11934912	5585	0	0
chr1-119622680-119624003	23148	248	0.838864
chr1-119631180-119631761	7169	15	0.164528
chr1-119647755-119648628	14181	4	0.0203274
chr1-119712222-119712649	6000	1	0.0109439
chr1-1197448-1197838	7997	70	0.678499
chr1-11980057-11980736	14361	0	0
chr1-119853187-119853452	3463	25	0.574499
chr1-119896391-119896597	3696	34	0.6966
chr1-120068735-120069889	5585	0	0
chr1-1200981-1201776	16454	0	0
chr1-120176144-120176534	4637	0	0
chr1-12019195-12019846	13016	3	0.018443
chr1-120340913-120342284	4407	0	0
chr1-120414674-120415572	4546	12	0.204577
chr1-1206291-1206770	9059	0	0
chr1-12063432-12064091	11026	1	0.00531937
chr1-120724171-120724849	5055	0	0
chr1-120844362-120845208	3161	2	0.0457547
chr1-120912705-120914255	3663	0	0
chr1-120942198-120942586	4375	0	0
chr1-121008631-121010051	3972	12	0.199478
chr1-1210189-1210498	4711	51	0.823572
chr1-121097208-121098110	3408	0	0
chr1-121118209-121118586	3000	6	0.141227
chr1-1211329-1211534	3153	24	0.58426
chr1-121183932-121187361	3609	0	0
chr1-1213676-1214144	6667	16	0.178854
chr1-121395925-121397197	9829	0	0
chr1-121519060-121519727	11176	5	0.0324387
chr1-12166820-12167655	18928	3	0.0101036
chr1-1217143-1217754	14575	167	0.829613
chr1-1218405-1219039	8686	103	0.892297
chr1-12191278-12191928	11538	119	0.791096
chr1-1222938-1223222	5359	63	0.888189
chr1-12229898-12230528	13897	1	0.0035107
chr1-12230899-12231142	4178	0	0
chr1-1226580-1226901	4754	57	0.839843
chr1-1231622-1233605	47008	267	0.453426
chr1-1242506-1242827	5421	38	0.530475
chr1-1246377-1247090	15308	11	0.0556911
chr1-125085510-125088028	25703	213	0.643552
chr1-125118140-125119694	22088	214	0.745676
chr1-1254017-1254865	12910	155	0.883665
chr1-12540322-12540530	3336	36	0.813292
chr1-1255143-1255419	4547	50	0.891233
chr1-1258982-1259378	5276	70	1
chr1-12595877-12596235	6714	19	0.21853
chr1-12616979-12618636	20213	3	0.0086247
chr1-1267787-1268084	4288	63	0.945844
chr1-1273136-1274437	27101	2	0.00256914
chr1-1286018-1294783	83809	643	0.597143
chr1-1296482-1298279	20085	190	0.76534
chr1-1307021-1309805	55863	88	0.121661
chr1-1312607-1313113	7020	98	0.988864
chr1-1318943-1319168	3476	31	0.700227
chr1-1324264-1325255	22652	1	0.00384882
chr1-1327286-1328040	13406	122	0.714807
chr1-1332056-1333606	21876	198	0.732568
chr1-1336046-1336694	11430	112	0.762498
chr1-1336998-1337254	4330	36	0.630649
chr1-1338107-1340460	29140	259	0.71021
chr1-1341238-1341468	3057	30	0.811338
chr1-1348554-1351571	31707	6	0.0121151
chr1-13513011-13514118	18068	7	0.0295468
chr1-1354328-1355746	29394	63	0.165702
chr1-13554916-13555117	3579	46	0.820001
chr1-13583112-13583347	3500	23	0.494519
chr1-13583643-13584373	10392	19	0.132902
chr1-13699987-13700705	15820	3	0.0163245
chr1-1373761-1375659	30996	84	0.21347
chr1-13748773-13749963	24468	5	0.0131927
chr1-1387265-1387544	4319	48	0.801876
chr1-13892856-13893242	7574	16	0.15341
chr1-1398692-1400222	29925	5	0.0122641
chr1-1406729-1407555	16387	1	0.00298816
chr1-1419780-1420620	18542	66	0.268525
chr1-1426181-1426407	4012	14	0.251295
chr1-1427517-1427953	7678	11	0.107555
chr1-1430793-1431014	3908	23	0.435338
chr1-143497156-143498908	8367	5	0.0442377
chr1-1435561-1436069	11568	3	0.0161948
chr1-143642889-143643745	12485	33	0.194889
chr1-143651545-143652033	5143	21	0.306601
chr1-143653482-143653710	3271	8	0.176196
chr1-143661461-143662025	6626	10	0.117291
chr1-143736122-143736547	4757	13	0.212053
chr1-143905323-143905942	3381	1	0.0198771
chr1-1439082-1440204	26400	233	0.689283
chr1-144076477-144078302	4490	10	0.166736
chr1-144418772-144419244	4485	0	0
chr1-144461027-144462012	7606	0	0
chr1-144551959-144552270	5330	0	0
chr1-144882407-144884035	3018	1	0.0253966
chr1-145214834-145216221	5757	2	0.0301454
chr1-145232835-145233040	4202	0	0
chr1-145424964-145425970	11615	1	0.00495446
chr1-145453912-145454666	8007	41	0.400292
chr1-145607839-145608571	5138	1	0.0125011
chr1-145720882-145721118	3150	0	0
chr1-145823594-145824433	13174	0	0
chr1-145845533-145845932	7306	0	0
chr1-145858693-145859938	17686	3	0.0113053
chr1-145885751-145886256	6530	0	0
chr1-145918452-145919050	7733	0	0
chr1-145927162-145927504	4577	0	0
chr1-145957607-145958063	8467	1	0.00795061
chr1-145960386-145962107	25166	6	0.0171256
chr1-145964417-145964848	5189	0	0
chr1-14598115-14599497	22345	17	0.0536676
chr1-146019305-146019601	6148	16	0.189596
chr1-146049361-146049712	3586	36	0.793952
chr1-146052260-146052583	3048	0	0
chr1-1460706-1460958	3670	21	0.43818
chr1-146228090-146229263	5274	2	0.029243
chr1-146472223-146472703	4175	0	0
chr1-146938267-146939361	11439	1	0.00558282
chr1-147050657-147050993	4336	50	0.817489
chr1-147072440-147072891	5493	14	0.199003
chr1-147078303-147078527	3218	25	0.607017
chr1-147078743-147079711	11730	63	0.411014
chr1-147079928-147080215	4176	1	0.0177337
chr1-147080780-147081028	3433	1	0.0194025
chr1-147084766-147085129	4359	0	0
chr1-1471465-1472441	13447	0	0
chr1-147171892-147172922	17382	3	0.0103904
chr1-147178044-147178273	5368	4	0.0560159
chr1-147242440-147243628	17929	4	0.0144821
chr1-147599457-147600151	11478	1	0.00557866
chr1-147669721-147670796	14121	4	0.0173341
chr1-147908012-147908355	5392	53	0.80422
chr1-147928242-147928974	7098	2	0.0186053
chr1-148146123-148146930	9174	118	0.886845
chr1-148148926-148149685	6730	80	0.864351
chr1-148151368-148152377	10103	0	0
chr1-148159901-148160124	3296	50	0.985263
chr1-148160688-148160978	3884	38	0.753566
chr1-1481906-1482373	5746	64	0.885979
chr1-148263175-148263476	4287	2	0.0367898
chr1-148264741-148265029	3789	4	0.0731821
chr1-148309959-148310365	4860	27	0.433072
chr1-148317537-148317864	4851	43	0.662886
chr1-148354040-148354260	3387	31	0.620249
chr1-148379177-148379496	3748	23	0.476859
chr1-148402396-148402693	4823	0	0
chr1-148458797-148460187	5071	0	0
chr1-1484847-1485304	4110	79	0.923237
chr1-148678843-148680005	6267	1	0.0100495
chr1-149102913-149103904	4064	0	0
chr1-149175502-149177055	3084	5	0.0898184
chr1-14923878-14925049	24632	12	0.0328284
chr1-149606800-149608359	3875	0	0
chr1-149636432-149636752	4602	0	0
chr1-149792573-149793433	6314	0	0
chr1-149811970-149812469	3196	21	0.412064
chr1-149813038-149813657	4069	2	0.0385902
chr1-149886220-149887920	19567	1	0.00438593
chr1-149899527-149900393	13959	59	0.319717
chr1-149927734-149928001	5034	0	0
chr1-150010205-150010911	12447	2	0.0127417
chr1-150067268-150067758	6060	0	0
chr1-150149506-150150888	29016	0	0
chr1-150234624-150235494	18230	1	0.00280877
chr1-150268648-150269254	10393	0	0
chr1-150281955-150282226	4318	2	0.0331002
chr1-150321387-150321691	5265	0	0
chr1-15048568-15048917	3116	13	0.335437
chr1-150515561-150515940	7755	2	0.0168526
chr1-150548874-150549892	19098	48	0.196245
chr1-150557180-150557428	3521	30	0.684962
chr1-150561600-150561825	3511	0	0
chr1-150578853-150579877	19207	2	0.00494375
chr1-150629235-150629725	6691	1	0.00937705
chr1-15065686-15066023	5927	54	0.736327
chr1-1509209-1509469	3506	27	0.57845
chr1-150926144-150926363	3872	0	0
chr1-150974021-150975474	27963	4	0.0077316
chr1-151008260-151008616	6768	0	0
chr1-151047736-151048151	6335	0	0
chr1-151059292-151059876	9396	1	0.00607857
chr1-151070395-151071095	7653	2	0.0215705
chr1-151131210-151133624	40311	362	0.696816
chr1-151145574-151146897	21226	28	0.096268
chr1-1511499-1512825	22156	0	0
chr1-151198372-151199056	8887	0	0
chr1-151281183-151283293	30665	3	0.00542051
chr1-151328047-151328248	3186	1	0.0243946
chr1-151346851-151347069	3529	0	0
chr1-151399382-151400106	9772	1	0.0064621
chr1-151458751-151459556	12017	2	0.0161985
chr1-151473396-151473666	5194	4	0.0539289
chr1-151511098-151511642	10084	0	0
chr1-15152724-15154975	35376	22	0.046656
chr1-151540186-151540723	9176	2	0.013653
chr1-151611899-151612729	18504	2	0.00812387
chr1-151721516-151721806	4056	1	0.0180261
chr1-151762970-151763617	10064	1	0.00634805
chr1-151790129-151791531	17296	0	0
chr1-151837985-151839208	22796	12	0.0367201
chr1-151839778-151840049	5858	4	0.0512344
chr1-151909288-151909931	11890	0	0
chr1-1519923-1520512	6777	81	0.92376
chr1-151993182-151994417	20619	1	0.00427428
chr1-152036363-152036636	3727	1	0.0203767
chr1-152107522-152112739	44072	147	0.263826
chr1-1521450-1521694	3080	47	0.970104
chr1-15214686-15214951	3002	38	0.895177
chr1-152188846-152189452	9340	29	0.235234
chr1-1522575-1523649	14875	140	0.744319
chr1-15247125-15247457	7446	9	0.0882494
chr1-152515582-152515794	3089	4	0.0960623
chr1-1529129-1529426	3866	36	0.711789
chr1-153260997-153261837	15622	7	0.0305297
chr1-1535225-1536210	16107	144	0.698977
chr1-153535949-153536364	6464	0	0
chr1-153633702-153634498	11790	12	0.0826974
chr1-153658590-153658893	7099	0	0
chr1-153670843-153671053	3341	1	0.0234644
chr1-153678355-153679899	26789	14	0.0373793
chr1-153689728-153689963	4457	45	0.769361
chr1-153727741-153728025	4778	0	0
chr1-1537728-1537962	4308	39	0.811212
chr1-153775180-153776222	17867	3	0.00973642
chr1-153783482-153783859	8023	0	0
chr1-153922362-153922810	5924	1	0.010872
chr1-153922994-153923445	5736	0	0
chr1-153941868-153942102	4154	52	0.895777
chr1-153945897-153946858	19384	1	0.00203691
chr1-153958071-153958654	12881	3	0.0137174
chr1-1539583-1541289	26065	70	0.204808
chr1-153963306-153963652	6430	0	0
chr1-153967168-153967504	5540	1	0.013099
chr1-153977237-153978049	13147	2	0.0110311
chr1-153990752-153991034	4055	0	0
chr1-15409555-15410732	22435	0	0
chr1-154182793-154183450	9713	2	0.0157245
chr1-154220368-154221312	15458	0	0
chr1-154272235-154272813	6889	1	0.00925516
chr1-154325563-154326068	10788	0	0
chr1-154328500-154329052	11722	5	0.0284414
chr1-154405195-154405969	13496	0	0
chr1-154501632-154503223	34569	96	0.212776
chr1-154558206-154559089	15966	1	0.00570234
chr1-154567758-154568097	6436	5	0.0530593
chr1-154571343-154572237	15285	166	0.872929
chr1-154607905-154608321	7520	1	0.00947607
chr1-154627288-154628029	10822	1	0.00579553
chr1-154760347-154760960	10992	21	0.150841
chr1-154772111-154772388	3418	40	0.896879
chr1-154936487-154937455	14269	1	0.00605426
chr1-154961453-154962259	18609	2	0.00696839
chr1-154973762-154974022	3181	1	0.0205274
chr1-154974267-154975010	9781	0	0
chr1-154999395-154999928	8496	1	0.00763352
chr1-155000775-155001882	14168	0	0
chr1-155003372-155004060	8889	0	0
chr1-155050513-155051856	24480	1	0.00147117
chr1-155062450-155064102	20277	31	0.11528
chr1-155070937-155071446	8885	2	0.0164358
chr1-155078680-155082545	54741	15	0.0166788
chr1-155084712-155085580	14016	0	0
chr1-155125959-155127975	30368	124	0.328777
chr1-155135532-155136135	11235	1	0.00584878
chr1-155140501-155140703	3423	1	0.0195527
chr1-155172867-155173462	9921	0	0
chr1-155188537-155192004	3997	21	0.385238
chr1-155193644-155194027	5357	3	0.038459
chr1-155194409-155195369	15261	6	0.0263907
chr1-155208757-155209168	7649	0	0
chr1-155227120-155227743	8302	2	0.0156538
chr1-15524104-15525086	14115	1	0.00391583
chr1-155250292-155250758	7373	0	0
chr1-155254834-155255864	16308	16	0.0735421
chr1-155262022-155262521	7208	0	0
chr1-15526614-15527168	10254	1	0.00572566
chr1-155269488-155269703	3856	51	0.880203
chr1-155273071-155273645	14122	1	0.00421852
chr1-155277201-155277957	13382	1	0.00395871
chr1-155294528-155295745	17586	51	0.22726
chr1-155308617-155308952	5265	0	0
chr1-155320816-155321210	6243	0	0
chr1-155322679-155325642	42834	39	0.0660838
chr1-1554153-1554414	3660	67	0.835833
chr1-155562496-155563489	15476	2	0.00888497
chr1-155609942-155610537	6496	2	0.0207464
chr1-155688042-155689334	23479	1	0.00174141
chr1-155745507-155746117	6282	0	0
chr1-15584594-15585113	10366	1	0.00611443
chr1-155859319-155859640	3932	1	0.016696
chr1-155860405-155860698	5034	3	0.0470844
chr1-155934282-155934516	4746	0	0
chr1-155950861-155951107	4472	46	0.762459
chr1-155977888-155978699	16729	2	0.00839859
chr1-156020599-156020989	5000	0	0
chr1-15603329-15603794	7091	1	0.00986184
chr1-156053172-156054188	17355	3	0.00976275
chr1-156054532-156054849	4939	1	0.013203
chr1-156076553-156077593	18319	141	0.601044
chr1-156081449-156081933	8584	2	0.0153735
chr1-156082282-156082799	8402	0	0
chr1-156106461-156106680	3948	1	0.0191486
chr1-156114696-156115347	12455	0	0
chr1-156135917-156136380	5909	59	0.801225
chr1-15617327-15617861	12136	1	0.00526215
chr1-156193882-156194261	4870	0	0
chr1-156212794-156213306	9128	2	0.0142974
chr1-156216447-156216856	7077	71	0.754573
chr1-156245578-156246108	9706	6	0.0477047
chr1-156282449-156282924	9011	2	0.0139678
chr1-156291409-156291634	4122	38	0.705866
chr1-156338383-156338651	4810	0	0
chr1-156368968-156369460	7730	19	0.203796
chr1-156388259-156388771	11393	6	0.0427531
chr1-156420612-156421927	20866	1	0.00193094
chr1-156435369-156436558	21296	18	0.0653611
chr1-156436714-156436973	3350	3	0.0631766
chr1-156456758-156457570	11697	0	0
chr1-156499826-156501268	24300	0	0
chr1-156505151-156505528	4918	0	0
chr1-156572308-156572710	6431	0	0
chr1-156591885-156592088	3834	0	0
chr1-156623866-156625674	31327	26	0.061145
chr1-156641848-156642655	13162	25	0.148818
chr1-156646762-156647154	8997	50	0.445343
chr1-156657551-156657784	4966	0	0
chr1-156676501-156677468	16733	38	0.177171
chr1-156705067-156706862	24892	7	0.0198028
chr1-156728320-156729124	12933	1	0.00415399
chr1-156741007-156741354	4987	0	0
chr1-156750956-156752277	25706	3	0.00709724
chr1-156767244-156768221	12311	0	0
chr1-156813732-156814245	10106	3	0.022422
chr1-15684084-15685007	15545	1	0.00368869
chr1-156845090-156846000	14447	36	0.194384
chr1-156848911-156849400	7588	34	0.348523
chr1-156859013-156861310	30653	23	0.0548918
chr1-156893624-156893919	5096	2	0.0269985
chr1-156907978-156908350	6786	45	0.514033
chr1-156920452-156921014	11419	24	0.170845
chr1-156923728-156924440	11463	12	0.0741935
chr1-156927408-156928004	9932	18	0.133717
chr1-157045505-157046163	14431	2	0.00970172
chr1-157137958-157138853	16630	0	0
chr1-157194749-157195345	10276	19	0.146532
chr1-15727122-15727480	4557	56	0.880442
chr1-15731803-15732010	3492	36	0.766415
chr1-1574103-1575367	27341	3	0.00565695
chr1-15744134-15744358	3497	24	0.526595
chr1-15746824-15747026	3199	33	0.790269
chr1-15758577-15759367	15159	15	0.0693811
chr1-157978931-157979263	5123	16	0.233702
chr1-157993611-157994157	9908	1	0.00699517
chr1-158113408-158113750	7532	4	0.0360128
chr1-158177644-158178064	5382	28	0.414544
chr1-158180831-158181713	11586	1	0.00519623
chr1-15834766-15836385	27153	2	0.00360127
chr1-15837258-15837628	7944	23	0.223795
chr1-15847395-15848901	32780	1	0.00073579
chr1-15849335-15849622	4125	0	0
chr1-159171413-159171928	8077	11	0.0978255
chr1-159188439-159188708	3530	0	0
chr1-15934376-15934660	3432	37	0.781687
chr1-15943406-15943764	6090	75	0.948773
chr1-15944097-15945087	16133	163	0.771053
chr1-15975408-15976177	13864	0	0
chr1-159780627-159781563	15291	2	0.00706139
chr1-159854217-159855130	15398	3	0.0143215
chr1-1598952-1600756	34749	83	0.179841
chr1-159900112-159900353	4206	24	0.46179
chr1-159924540-159925608	14742	1	0.00337991
chr1-159929643-159930063	7789	66	0.68522
chr1-159945603-159946007	8217	3	0.0235571
chr1-160031506-160032199	10075	0	0
chr1-160070057-160070878	11703	2	0.0139331
chr1-160083932-160084948	19911	82	0.340897
chr1-160098251-160098640	6214	0	0
chr1-160205301-160205912	11723	2	0.00999231
chr1-160261966-160262661	11655	2	0.0134034
chr1-160343139-160343548	6966	3	0.0281924
chr1-160400323-160400894	10108	2	0.0117983
chr1-160419314-160419596	4363	43	0.725558
chr1-16073154-16073496	8029	5	0.0483608
chr1-160801894-160802163	4389	38	0.67522
chr1-161020929-161021435	6900	0	0
chr1-161038588-161039040	9609	8	0.0644897
chr1-161079557-161079947	7451	80	0.845338
chr1-161098273-161099011	12464	13	0.079346
chr1-161117933-161118322	7808	0	0
chr1-161159349-161159899	9597	1	0.00580893
chr1-161166212-161166896	9095	0	0
chr1-161177272-161177661	6434	2	0.0246799
chr1-161202020-161202466	6239	4	0.0453009
chr1-161258688-161259238	9811	22	0.170466
chr1-161314329-161314661	5043	2	0.0277155
chr1-16137882-16138126	3862	29	0.619029
chr1-161389710-161390596	13012	2	0.011198
chr1-161399074-161400142	13449	1	0.00387257
chr1-161440077-161472713	30967	110	0.271717
chr1-16148617-16148829	3154	33	0.814363
chr1-1615074-1616635	34455	25	0.0510808
chr1-161524235-161525566	12923	15	0.0906918
chr1-161530639-161530962	3458	1	0.0190212
chr1-16154990-16155965	15945	2	0.00649687
chr1-161605745-161607118	13012	125	0.746463
chr1-161612244-161612587	3928	1	0.0164733
chr1-16167567-16168010	8505	1	0.00675563
chr1-161725848-161727508	25653	1	0.00154218
chr1-161749625-161750286	11518	1	0.00477418
chr1-161983827-161984249	4742	42	0.708581
chr1-162023233-162024341	17647	22	0.0953815
chr1-16206423-16208085	24536	53	0.160637
chr1-162069429-162070262	17296	0	0
chr1-16217189-16217812	8173	4	0.0439142
chr1-16226832-16227165	6686	32	0.383342
chr1-1623208-1623979	15471	149	0.758064
chr1-162367087-162367531	7876	76	0.741884
chr1-16237050-16237304	6658	2	0.0240308
chr1-162497810-162498237	8808	0	0
chr1-1625401-1625675	4838	49	0.763036
chr1-162561067-162562063	19753	0	0
chr1-1626670-1634630	80142	338	0.330639
chr1-162790461-162790932	3038	1	0.0253529
chr1-162822387-162822784	5843	3	0.0353931
chr1-163321690-163322231	8637	0	0
chr1-163423088-163423310	3358	27	0.655192
chr1-16352080-16352697	13038	0	0
chr1-16367127-16367775	10941	2	0.0107218
chr1-164321279-164321530	4938	5	0.0745412
chr1-16440504-16441308	12586	2	0.0095862
chr1-164576304-164576680	8086	64	0.609349
chr1-16498644-16499882	23459	3	0.00735401
chr1-165117520-165117789	4947	8	0.127606
chr1-16520786-16521397	7338	42	0.454728
chr1-165235265-165236270	13001	26	0.156027
chr1-16534379-16535801	11283	24	0.17286
chr1-165352467-165353081	7723	15	0.152017
chr1-165354250-165354574	4308	2	0.0331914
chr1-165354955-165357091	29909	31	0.0760311
chr1-165598029-165598293	3492	0	0
chr1-165630489-165631337	10166	0	0
chr1-165698308-165698580	5671	1	0.0111437
chr1-165768596-165769112	5841	1	0.0167095
chr1-165827417-165828446	22326	1	0.00179083
chr1-1658613-1659481	9765	0	0
chr1-165941404-165941741	4313	36	0.642504
chr1-16612962-16613959	69253	6	0.00395912
chr1-166165022-166167211	33419	6	0.0102182
chr1-16644361-16644997	48915	180	0.261177
chr1-16646991-16648550	22262	100	0.349171
chr1-16680248-16680656	3076	55	0.515679
chr1-166839105-166840107	17836	0	0
chr1-166875760-166876536	13405	1	0.00438725
chr1-166884017-166884553	6434	22	0.260992
chr1-166920540-166921412	18432	76	0.314568
chr1-166947629-166947978	5685	4	0.0539147
chr1-1669543-1669792	3706	49	0.91951
chr1-166975333-166975932	11356	0	0
chr1-166988984-166989446	6982	83	0.86709
chr1-16707274-16708233	6305	9	0.101693
chr1-167121339-167121773	6541	8	0.0913145
chr1-167219894-167222124	32748	2	0.00285721
chr1-16724997-16725396	17053	154	0.696388
chr1-167439276-167439900	8836	2	0.0179886
chr1-167454852-167455979	20496	2	0.00662418
chr1-167553233-167553833	13356	1	0.00424369
chr1-16758917-16760479	4426	17	0.284249
chr1-167630236-167630602	6738	0	0
chr1-167714241-167714680	9266	2	0.0165536
chr1-167721742-167722615	17232	0	0
chr1-167820159-167820409	4540	1	0.0143223
chr1-167935790-167936877	15584	0	0
chr1-167937205-167937563	3625	0	0
chr1-168056271-168056484	4349	66	0.901743
chr1-168136079-168136920	16014	0	0
chr1-168178726-168179399	9847	3	0.0223508
chr1-168225708-168226601	15739	0	0
chr1-16872132-16873554	10632	34	0.250357
chr1-16888927-16889599	9325	4	0.0313174
chr1-16904804-16905185	4577	1	0.0145995
chr1-169105529-169107173	28354	2	0.0031271
chr1-16913544-16914475	18466	17	0.0720055
chr1-1692088-1693628	6329	0	0
chr1-169427384-169427631	3168	5	0.131662
chr1-169485321-169486339	16237	0	0
chr1-16955324-16955561	4302	36	0.644942
chr1-16960796-16961189	7798	0	0
chr1-16966410-16966620	3454	31	0.675967
chr1-169794833-169795206	5075	1	0.0146721
chr1-16980057-16980868	13453	4	0.0207006
chr1-169893315-169893816	10271	0	0
chr1-170074470-170074856	5088	1	0.0144176
chr1-17011335-17012087	17166	2	0.00796704
chr1-17053962-17054227	5758	0	0
chr1-170661316-170661656	5114	5	0.0783391
chr1-170664162-170665037	12355	12	0.0710724
chr1-17119157-17119593	8202	2	0.0163445
chr1-171485379-171486100	9341	1	0.0067576
chr1-17149208-17149580	7225	63	0.682937
chr1-171670808-171671084	4651	63	0.991037
chr1-171741706-171742467	12284	1	0.0054364
chr1-171781260-171781794	8475	0	0
chr1-171841328-171842185	15205	2	0.0071167
chr1-1723957-1724792	8994	1	0.0066925
chr1-172443728-172444141	5769	0	0
chr1-172532771-172533405	11713	2	0.0105382
chr1-173476840-173477966	17717	1	0.00285501
chr1-173669524-173669906	5449	9	0.120931
chr1-173824151-173824957	9917	0	0
chr1-173868035-173868779	14026	1	0.00339642
chr1-174021668-174022711	18407	1	0.00232336
chr1-174159159-174159909	17655	1	0.00277036
chr1-17419705-17420051	4612	21	0.346425
chr1-17437577-17439981	33424	2	0.00239372
chr1-1745363-1746894	5224	0	0
chr1-174999354-175000488	20068	1	0.00449634
chr1-175023230-175023660	5728	0	0
chr1-175079415-175079738	5663	73	0.892972
chr1-175192765-175193087	4439	0	0
chr1-1753935-1754532	9614	82	0.669636
chr1-17539435-17540048	13141	1	0.00427398
chr1-175599241-175599672	7060	3	0.0304178
chr1-1760329-1760624	4149	52	0.908123
chr1-176206576-176207675	20396	1	0.00233516
chr1-17622958-17623175	3164	27	0.65447
chr1-17696987-17697297	6051	55	0.703986
chr1-177164257-177164710	6025	12	0.149889
chr1-177170985-177171187	3721	4	0.0754147
chr1-177181679-177182029	5187	1	0.0123077
chr1-1777956-1779143	27142	1	0.0011201
chr1-178037696-178038149	8500	12	0.104205
chr1-178094119-178094711	11741	2	0.0100684
chr1-1782201-1782702	8365	24	0.232396
chr1-17825884-17826347	5257	27	0.408474
chr1-178486665-178487151	9377	31	0.248862
chr1-178542228-178543221	15466	3	0.0120439
chr1-178724834-178726013	18821	0	0
chr1-179025724-179026782	20348	3	0.0100389
chr1-179081941-179082813	15978	3	0.011116
chr1-179229029-179230065	13509	1	0.00468106
chr1-179293637-179294186	9285	1	0.00718866
chr1-179365660-179366203	8579	1	0.00785426
chr1-179575586-179576172	12184	30	0.186341
chr1-179586230-179586915	10240	29	0.226222
chr1-179591617-179592461	14655	92	0.499403
chr1-179742813-179744816	35536	90	0.19509
chr1-179877745-179877971	4079	0	0
chr1-179882348-179883236	15469	1	0.00363986
chr1-179954582-179955284	12662	3	0.0179684
chr1-180154421-180155449	18939	3	0.00935502
chr1-180228985-180235840	78283	71	0.0673067
chr1-180502191-180503142	16501	1	0.00320976
chr1-180631892-180632680	14283	1	0.0033968
chr1-180912181-180913283	21895	2	0.00629763
chr1-180935181-180935575	9553	88	0.708952
chr1-180953780-180954556	15404	14	0.0665189
chr1-181022092-181022329	3064	0	0
chr1-181022584-181023013	9281	0	0
chr1-18107612-18108319	13233	21	0.122754
chr1-181088368-181090040	31569	3	0.00448815
chr1-18109073-18109410	4322	6	0.106443
chr1-18110058-18111179	17280	8	0.0335222
chr1-181104782-181105866	21535	1	0.00200009
chr1-181318165-181318737	8002	4	0.0365669
chr1-181413155-181413712	11207	98	0.671925
chr1-181482176-181482913	14203	56	0.301765
chr1-181483571-181483937	4825	23	0.370636
chr1-181485839-181486125	4169	11	0.211988
chr1-181798358-181798757	5188	39	0.568133
chr1-182029791-182030206	9610	1	0.0103945
chr1-182056470-182057376	15992	72	0.342753
chr1-182390563-182392428	32065	5	0.0076596
chr1-182604241-182604625	5673	1	0.012381
chr1-182615043-182615410	6744	0	0
chr1-182789261-182789962	16060	2	0.00695517
chr1-182839178-182839987	15451	2	0.00855014
chr1-182952685-182953509	16294	95	0.450477
chr1-183022670-183024235	27393	2	0.00439158
chr1-183416866-183418529	20079	72	0.270938
chr1-183472491-183473120	11690	0	0
chr1-183635149-183636198	18492	1	0.00278668
chr1-18365381-18365587	3417	18	0.432334
chr1-18376802-18377002	3593	21	0.44263
chr1-184036226-184037632	23408	15	0.0456353
chr1-184051648-184051920	5697	0	0
chr1-184386282-184387490	16936	1	0.00264889
chr1-184664090-184664529	6974	42	0.48366
chr1-184754119-184755304	20939	1	0.00198269
chr1-18482380-18483173	15050	167	0.87172
chr1-184973731-184974645	16053	0	0
chr1-185045238-185046088	16549	3	0.0130888
chr1-185156719-185157573	13480	2	0.00843534
chr1-185316198-185317234	19153	3	0.0110498
chr1-18630402-18633335	32691	23	0.0518224
chr1-18636322-18636987	10349	4	0.0307372
chr1-186374993-186375716	11378	0	0
chr1-18637687-18637907	4019	5	0.100752
chr1-18640758-18641625	9838	5	0.0356084
chr1-18643055-18644245	17400	3	0.01317
chr1-18645236-18645603	4877	5	0.0705898
chr1-18646535-18647239	9332	3	0.0246693
chr1-186680680-186680949	3462	6	0.133436
chr1-18784227-18784438	3241	42	0.945113
chr1-18854452-18854975	7264	65	0.683114
chr1-18877381-18877740	5667	84	0.951532
chr1-18883133-18883420	3747	41	0.790453
chr1-1889967-1891833	40407	2	0.00154313
chr1-18902335-18903140	14670	1	0.00411463
chr1-18955455-18957389	37768	4	0.0042735
chr1-1908520-1909162	14776	1	0.00333057
chr1-1918660-1919952	23089	17	0.0524541
chr1-19209658-19210552	15199	1	0.00389941
chr1-19251391-19252214	14852	1	0.00403669
chr1-19273756-19274448	10583	94	0.69674
chr1-1927808-1928084	3988	31	0.595768
chr1-192808503-192809068	9877	1	0.00675736
chr1-19288505-19289166	11325	47	0.317817
chr1-193059092-193060141	16538	1	0.00352081
chr1-193105045-193105434	6923	0	0
chr1-19311714-19312815	22307	1	0.00198914
chr1-193121599-193122094	8025	0	0
chr1-19338517-19338782	4214	37	0.700884
chr1-1943277-1943576	4543	37	0.64543
chr1-1944179-1944438	3886	4	0.0726249
chr1-19485210-19486150	18133	1	0.00224702
chr1-1954906-1955431	8139	63	0.618701
chr1-19596848-19597508	11745	2	0.011026
chr1-19643762-19645429	32680	22	0.0479239
chr1-1964976-1965189	3047	27	0.656266
chr1-196608579-196608881	4380	4	0.0645569
chr1-1966143-1966347	3265	24	0.574019
chr1-19664654-19666295	28392	41	0.109957
chr1-19679018-19679372	5833	50	0.634394
chr1-196878029-196878288	4470	12	0.199894
chr1-197146149-197146861	8584	1	0.00684175
chr1-197200876-197201589	9738	0	0
chr1-197774802-197775658	16607	1	0.00323903
chr1-1978830-1982361	20875	228	0.882916
chr1-197902459-197903169	15074	2	0.00701572
chr1-197910887-197912507	18693	19	0.0719334
chr1-197915931-197916259	5248	4	0.0513528
chr1-197917959-197918661	9576	14	0.108809
chr1-197921349-197921694	4074	13	0.241417
chr1-19800030-19800287	4210	0	0
chr1-198156767-198157712	19590	2	0.0057523
chr1-198159018-198159234	3870	0	0
chr1-19882315-19882969	16157	2	0.00644952
chr1-200035347-200035805	5424	11	0.157642
chr1-200039265-200039919	12963	6	0.0340021
chr1-200040680-200040908	4048	7	0.133568
chr1-200042273-200042927	8910	18	0.150412
chr1-200147569-200148076	8948	120	0.916286
chr1-200302149-200302410	4036	1	0.0160592
chr1-200409772-200410237	9432	2	0.01372
chr1-200620425-200620996	10315	0	0
chr1-200669485-200670256	12916	1	0.00395774
chr1-200739194-200739820	14032	2	0.00786221
chr1-200873069-200874260	23061	102	0.348792
chr1-200890949-200891448	10147	7	0.0472298
chr1-200911466-200912142	8150	69	0.648728
chr1-201000496-201000810	4297	54	0.915929
chr1-201023155-201023871	15762	3	0.0145826
chr1-201114331-201115439	19255	67	0.269464
chr1-201154118-201154618	7253	1	0.00984606
chr1-201170747-201171376	9630	1	0.0071617
chr1-201283325-201284520	18441	71	0.294685
chr1-201399134-201399904	16004	46	0.216576
chr1-201468392-201469520	19336	15	0.0612795
chr1-201481753-201481977	4599	2	0.0333719
chr1-201506758-201507388	11894	3	0.0216205
chr1-201538652-201540189	23523	8	0.0223336
chr1-201647914-201650660	34898	156	0.340721
chr1-201739660-201740301	9704	2	0.012803
chr1-201829086-201829570	7947	1	0.00743324
chr1-20185868-20186304	6597	2	0.0201433
chr1-201888787-201889178	7891	15	0.148593
chr1-2018973-2020040	18564	33	0.1379
chr1-201955209-201955925	9494	1	0.0071377
chr1-201982458-201983451	18256	1	0.00275783
chr1-202144024-202145015	20437	2	0.00476845
chr1-202193881-202194262	7757	2	0.0164086
chr1-202214066-202214535	8632	19	0.178638
chr1-202341916-202342184	3593	1	0.0190917
chr1-202348530-202349068	8885	0	0
chr1-20242963-20243324	6883	69	0.762521
chr1-2025608-2025947	5819	24	0.319304
chr1-202642541-202643911	21690	7	0.0211147
chr1-202709796-202710641	15332	6	0.0258786
chr1-2027976-2028428	7916	55	0.549237
chr1-202806876-202808599	30556	4	0.00745305
chr1-202810663-202811556	15724	2	0.0074497
chr1-202860934-202861795	12995	1	0.00455322
chr1-202888556-202889266	16359	2	0.00611921
chr1-202927077-202927396	5451	0	0
chr1-202957752-202958568	15396	2	0.00882623
chr1-202966918-202967499	6834	0	0
chr1-2029969-2030411	7839	43	0.432405
chr1-203007201-203007900	12699	1	0.00426746
chr1-203026345-203027057	12893	8	0.043147
chr1-203075595-203076262	12865	11	0.0685501
chr1-203128106-203128368	3953	1	0.018692
chr1-203273392-203273690	3889	3	0.0627498
chr1-203305170-203306210	17653	1	0.00257757
chr1-203327150-203327801	9790	1	0.00582709
chr1-20343074-20343525	7474	12	0.117646
chr1-203487657-203487931	4322	0	0
chr1-203629344-203629725	7164	2	0.0215079
chr1-20366090-20367041	19250	43	0.171136
chr1-203795441-203796165	8849	0	0
chr1-203861380-203861773	4434	0	0
chr1-204073118-204075382	33566	23	0.0513365
chr1-204151271-204152433	20509	29	0.110942
chr1-204190471-204190705	3723	1	0.0204043
chr1-204257417-204257780	4635	40	0.654564
chr1-2043248-2043503	4704	35	0.595453
chr1-204377605-204378302	9930	42	0.303244
chr1-204411186-204412031	13122	0	0
chr1-2044685-2045207	9622	2	0.0127841
chr1-204494166-204494842	12408	1	0.00438045
chr1-204516346-204516703	6194	0	0
chr1-204685005-204685757	16596	23	0.102311
chr1-20483970-20487018	48218	21	0.0292254
chr1-2049813-2051773	40706	66	0.121197
chr1-205069657-205070025	6203	67	0.819112
chr1-20507924-20508390	8001	2	0.0164066
chr1-205210836-205211782	17250	0	0
chr1-205227664-205228124	10031	0	0
chr1-205228505-205228831	4482	2	0.0313523
chr1-205241568-205242036	6759	69	0.785916
chr1-205268985-205269418	5749	62	0.848493
chr1-205321105-205321907	13043	1	0.00416804
chr1-205343366-205344448	21967	29	0.0987314
chr1-205430603-205430853	4954	4	0.0673799
chr1-205455702-205457360	26186	22	0.0629863
chr1-205504750-205504981	5074	1	0.0141987
chr1-20552402-20554002	29673	6	0.0119726
chr1-205528876-205529462	9536	31	0.251597
chr1-205568624-205569438	14717	6	0.0304494
chr1-205591962-205592345	5384	1	0.0122514
chr1-205631366-205632304	21407	2	0.00620991
chr1-205662850-205663126	4187	43	0.759639
chr1-205679848-205680775	16025	4	0.0153353
chr1-205749111-205750217	15393	1	0.00328074
chr1-205774773-205775540	9862	0	0
chr1-205812743-205813882	19984	3	0.0095892
chr1-205849771-205850063	4266	46	0.794431
chr1-2059341-2059732	5260	56	0.863308
chr1-206117303-206117793	7363	1	0.00828264
chr1-206202467-206205885	4425	0	0
chr1-20633372-20634058	12920	6	0.0308831
chr1-206506904-206508111	24109	5	0.0125884
chr1-206557070-206557580	11176	0	0
chr1-20661024-20661745	11600	0	0
chr1-206612452-206612677	4919	0	0
chr1-206635179-206635842	13977	2	0.0105289
chr1-206684882-206686306	22183	0	0
chr1-206909349-206909857	11744	9	0.0535493
chr1-20696447-20696696	3914	0	0
chr1-20704516-20704876	5029	48	0.738792
chr1-207050745-207051105	6655	0	0
chr1-207052937-207053497	8190	5	0.0446484
chr1-20717340-20718278	19023	31	0.12473
chr1-20731514-20732873	23857	7	0.0188104
chr1-207321199-207322019	12232	1	0.00747622
chr1-2073741-2074126	8086	86	0.811002
chr1-207454187-207454935	12758	3	0.0186074
chr1-207496293-207496670	6740	0	0
chr1-207644967-207645607	12159	28	0.177428
chr1-207669461-207669914	8183	51	0.497623
chr1-207751827-207752619	13652	0	0
chr1-20786216-20787628	34410	1	0.00044926
chr1-207868518-207869373	15382	0	0
chr1-207910754-207911168	7315	1	0.00906695
chr1-207958983-207959772	13828	7	0.0345173
chr1-207963322-207963838	10423	2	0.0139643
chr1-208243145-208244284	19708	4	0.0122021
chr1-209231501-209232128	14251	101	0.556129
chr1-2093767-2094786	8591	81	0.733133
chr1-209675099-209676083	12860	11	0.0670783
chr1-209747609-209748000	4859	2	0.0271937
chr1-209784377-209784822	6603	0	0
chr1-209805972-209806321	7588	13	0.133148
chr1-209827785-209828083	3443	0	0
chr1-209937835-209938709	18249	23	0.0906759
chr1-210232599-210233905	23076	1	0.00151801
chr1-210292365-210292867	9249	5	0.0356885
chr1-210328744-210329449	14511	1	0.00439187
chr1-2107117-2107424	4278	37	0.707978
chr1-2109559-2109863	4205	36	0.657482
chr1-211133326-211134333	15715	25	0.118823
chr1-211207065-211207441	6796	72	0.809709
chr1-211258764-211260792	27814	1	0.00136301
chr1-211326590-211327294	15069	1	0.0041974
chr1-211382598-211382990	6496	0	0
chr1-211416336-211416879	11528	110	0.723026
chr1-211478965-211479412	7436	16	0.16161
chr1-2114991-2115426	6276	90	0.97556
chr1-211515120-211515762	11684	4	0.0241308
chr1-211577780-211579835	39149	3	0.00390343
chr1-211675300-211675834	7398	1	0.0131678
chr1-21176623-21177343	13819	1	0.00357254
chr1-211830090-211830938	19260	2	0.00661402
chr1-212035496-212036022	7619	1	0.00831992
chr1-21225082-21225438	6149	68	0.85942
chr1-212284626-212286352	32428	1	0.00163468
chr1-212414250-212414942	14101	2	0.00771037
chr1-212432764-212433502	14805	1	0.00336804
chr1-212514886-212515106	3499	10	0.20504
chr1-212558327-212559115	16053	9	0.0404059
chr1-212606810-212609744	43315	2	0.000573911
chr1-212699119-212700706	29069	1	0.00282709
chr1-212791525-212792005	7703	0	0
chr1-212858018-212858777	17099	0	0
chr1-21289888-21290608	15163	1	0.00305509
chr1-212950306-212951750	22323	15	0.051469
chr1-213015178-213015482	5790	1	0.011049
chr1-213051270-213051525	5526	1	0.0111795
chr1-2132344-2132613	3494	14	0.306586
chr1-2133190-2133740	8722	4	0.0340704
chr1-213389397-213389615	3224	26	0.615748
chr1-21344868-21345826	18420	1	0.00277029
chr1-2134929-2135227	4391	31	0.560269
chr1-213979872-213980325	7720	9	0.0937594
chr1-213982658-213983508	14803	17	0.0832667
chr1-213985384-213985737	6067	2	0.022605
chr1-213989166-213989394	4719	14	0.232781
chr1-214187265-214187585	5194	10	0.147083
chr1-21427996-21429502	10276	58	0.445872
chr1-214280754-214281704	17891	1	0.00282029
chr1-21436578-21436923	6277	13	0.157761
chr1-214383823-214384099	3785	39	0.784057
chr1-21439780-21440731	14336	6	0.0281229
chr1-214550762-214552185	22710	35	0.113859
chr1-214602914-214603592	9506	0	0
chr1-214605566-214606366	13178	159	0.893947
chr1-214608320-214609213	14476	159	0.820879
chr1-214870435-214870660	5138	55	0.768648
chr1-215082709-215083293	10534	6	0.0405488
chr1-21509056-21509851	14058	9	0.0463753
chr1-215567165-215567923	13099	2	0.0110647
chr1-21603687-21603887	3717	32	0.701865
chr1-21622182-21622770	10721	10	0.0696782
chr1-21651792-21652220	8173	1	0.00691166
chr1-21659211-21659609	8750	1	0.00752153
chr1-216600998-216601392	6251	2	0.0246002
chr1-21668571-21669450	13248	11	0.0664333
chr1-21669669-21669916	4689	0	0
chr1-2169415-2169746	3259	27	0.658323
chr1-217089657-217089872	4699	0	0
chr1-217134403-217135837	17579	11	0.0444399
chr1-217137408-217137836	8044	8	0.0712843
chr1-217138126-217138431	4211	2	0.0316443
chr1-2172838-2173047	3681	28	0.676561
chr1-21782637-21783768	21006	2	0.00427063
chr1-21814407-21814914	9372	39	0.31073
chr1-218164439-218165691	20151	9	0.0335291
chr1-21823191-21823404	3870	21	0.403556
chr1-218284678-218285342	8850	8	0.067911
chr1-21828808-21829072	4456	41	0.674946
chr1-218345716-218346332	8849	0	0
chr1-218346946-218347164	3047	0	0
chr1-2184994-2185362	6661	74	0.846172
chr1-21864857-21865099	4497	45	0.745775
chr1-21884500-21884825	4690	31	0.534572
chr1-21887410-21887626	3566	34	0.742724
chr1-2189579-2190379	11150	75	0.542389
chr1-219173768-219174230	7365	2	0.0183598
chr1-21936854-21937784	16377	3	0.0116081
chr1-2194450-2195203	11147	0	0
chr1-219927791-219928805	17440	7	0.0286051
chr1-220046075-220046719	10169	0	0
chr1-220093973-220094592	10383	3	0.0194314
chr1-22025425-22025701	4279	0	0
chr1-220272139-220272591	6667	0	0
chr1-2204479-2205912	20515	53	0.197643
chr1-22052517-22053536	20318	0	0
chr1-220528120-220529006	18906	4	0.0151754
chr1-220690166-220690907	14332	6	0.0290784
chr1-220748070-220748555	7521	5	0.0473212
chr1-220786675-220787261	10618	5	0.0328636
chr1-220877107-220877522	5543	3	0.0393029
chr1-220878625-220880331	23948	3	0.00670717
chr1-220881213-220881546	3564	14	0.293832
chr1-220882151-220882458	4080	50	0.926203
chr1-220884122-220884870	8161	99	0.906533
chr1-220887509-220887729	3180	20	0.472986
chr1-220891548-220892258	7223	31	0.335202
chr1-220894106-220894843	10201	71	0.540392
chr1-220895441-220895817	4475	50	0.859178
chr1-22120028-22120450	6455	81	0.963372
chr1-2212761-2213058	4340	4	0.0653907
chr1-22129531-22129732	3133	26	0.648605
chr1-22142420-22143759	21486	4	0.010381
chr1-221742133-221743462	20614	1	0.00230384
chr1-222465420-222465631	5383	0	0
chr1-222617606-222617878	3894	2	0.0401373
chr1-222618058-222618741	10454	0	0
chr1-222644126-222644329	3309	0	0
chr1-2226774-2229734	54263	37	0.0488603
chr1-222711985-222712888	11814	0	0
chr1-222814995-222815219	5050	0	0
chr1-22285722-22285925	3566	32	0.699171
chr1-223081477-223081699	3438	1	0.0291116
chr1-223142844-223143347	10017	8	0.0596059
chr1-223363501-223365286	26218	12	0.0345962
chr1-223393301-223393926	11477	29	0.197195
chr1-223394340-223394644	3862	39	0.787602
chr1-22342146-22342381	3074	0	0
chr1-223712289-223713121	18199	2	0.00519215
chr1-223748641-223749342	12358	52	0.326447
chr1-223845384-223846561	23603	4	0.00980401
chr1-223992561-223993122	8273	3	0.0255598
chr1-224114207-224114770	8353	0	0
chr1-224182884-224184053	26376	0	0
chr1-224330028-224330491	5581	0	0
chr1-224356822-224357522	13373	1	0.00695254
chr1-22451744-22452324	11954	1	0.004615
chr1-224615936-224617612	27472	26	0.0719099
chr1-224617707-224618151	5153	4	0.0622727
chr1-224929519-224930079	11226	3	0.0170429
chr1-225427020-225428810	32580	2	0.00360159
chr1-225475064-225475339	5561	4	0.0505025
chr1-22563103-22563603	10396	15	0.102877
chr1-225652569-225654093	27141	5	0.0115011
chr1-225677367-225677626	4206	6	0.106408
chr1-22576310-22576920	7939	81	0.777249
chr1-225777629-225778032	6617	1	0.0109013
chr1-225809945-225810531	12809	3	0.0175642
chr1-225881906-225883198	22146	2	0.00575018
chr1-225887451-225887980	7364	67	0.690617
chr1-225923943-225924852	15035	17	0.0801925
chr1-22593281-22593714	6245	30	0.380978
chr1-225939413-225939995	8228	52	0.485361
chr1-225999103-225999635	9183	1	0.00728243
chr1-22600653-22601049	5906	34	0.442773
chr1-226061757-226063756	34681	3	0.00372047
chr1-226083023-226084140	18804	16	0.0611117
chr1-226109587-226110885	22507	3	0.00817561
chr1-226121259-226122775	31660	6	0.0118525
chr1-226186335-226187059	13788	4	0.0184538
chr1-226223307-226224179	17720	14	0.0563076
chr1-226308661-226309800	22453	1	0.00158609
chr1-226407633-226408238	11968	3	0.0200052
chr1-22647558-22647810	3495	27	0.603186
chr1-226548680-226549711	20236	4	0.0129358
chr1-226703332-226703680	8967	0	0
chr1-226736860-226738852	33578	11	0.0222998
chr1-22676924-22677338	6904	33	0.381443
chr1-226870345-226871205	17056	1	0.00533021
chr1-226939369-226940729	22662	1	0.0018442
chr1-226976039-226976536	4032	32	0.607406
chr1-22710331-22711869	27155	6	0.0126948
chr1-227317746-227319051	21485	19	0.0619619
chr1-227541815-227542791	18697	64	0.263451
chr1-227558457-227558753	4214	16	0.303647
chr1-227560723-227561159	7909	23	0.21241
chr1-227563709-227563934	4780	0	0
chr1-227734943-227735730	17625	1	0.00264839
chr1-227786728-227787126	6093	58	0.7357
chr1-227787595-227788869	18380	5	0.0163696
chr1-227816127-227816382	3696	24	0.52748
chr1-22784412-22785074	7900	90	0.872095
chr1-227887677-227888049	6521	23	0.284683
chr1-227925250-227925514	4458	41	0.720573
chr1-227946722-227948581	31887	10	0.0209998
chr1-228006396-228008811	38115	39	0.0752554
chr1-228037742-228038308	10688	10	0.0634432
chr1-228058931-228059496	9995	29	0.224257
chr1-228082029-228083800	30059	1	0.000846724
chr1-228101969-228103483	30066	4	0.00677974
chr1-228109096-228109575	10017	0	0
chr1-228139808-228140859	21315	1	0.00211011
chr1-228157677-228158999	25916	260	0.79224
chr1-228165408-228166285	16766	2	0.00606132
chr1-228173917-228174990	8987	82	0.709717
chr1-228211771-228214336	43157	295	0.54133
chr1-228215532-228215827	4335	33	0.582587
chr1-228216448-228216696	4311	48	0.841387
chr1-228217017-228217312	4199	44	0.844207
chr1-228274185-228274438	3965	31	0.646867
chr1-228275549-228276787	19085	41	0.1726
chr1-228280264-228280796	7148	53	0.580928
chr1-228286135-228286342	3385	32	0.714374
chr1-228315856-228317061	17508	149	0.664135
chr1-228360377-228360629	3856	22	0.425062
chr1-228378249-228379420	18653	37	0.155631
chr1-228394728-228395193	6169	63	0.744346
chr1-228406111-228407012	16231	2	0.00627764
chr1-228416006-228416866	12355	6	0.0327983
chr1-228424880-228425402	8591	116	0.965563
chr1-228445682-228446426	9232	14	0.111468
chr1-228457407-228458733	16398	3	0.0121738
chr1-228463747-228464828	11967	5	0.0294808
chr1-228469627-228469860	3718	15	0.304971
chr1-228471237-228471451	3712	27	0.561093
chr1-228486646-228487914	24675	1	0.00140669
chr1-228555166-228555760	9002	41	0.338772
chr1-228620300-228621043	4806	8	0.115914
chr1-228646196-228648421	19966	10	0.0345551
chr1-228735064-228736550	24445	27	0.0838135
chr1-2290760-2291130	4424	1	0.0168532
chr1-229270900-229271382	11173	6	0.0365053
chr1-229342163-229343188	23784	0	0
chr1-229407197-229408023	12554	15	0.0925826
chr1-229431460-229434937	46528	146	0.240417
chr1-229507967-229508546	9942	0	0
chr1-22953061-22954076	21887	96	0.337448
chr1-229558026-229559327	29720	0	0
chr1-229594595-229594870	3250	41	0.935608
chr1-229625382-229626552	19651	2	0.00463992
chr1-230066748-230068462	30448	1	0.0018403
chr1-2300872-2301178	4325	0	0
chr1-23019322-23020184	19182	1	0.00267135
chr1-230279597-230279943	4318	40	0.719578
chr1-230332759-230333104	4379	34	0.584017
chr1-230356971-230357199	3126	23	0.601413
chr1-2303870-2304228	5537	45	0.648523
chr1-230425358-230426956	28473	19	0.0468336
chr1-2305004-2307630	38108	441	0.910413
chr1-230642332-230642847	9737	4	0.0309561
chr1-230867886-230868909	16982	2	0.00882762
chr1-230978126-230979127	17884	1	0.00223314
chr1-231039317-231041263	31368	17	0.0390313
chr1-231160814-231161599	9916	7	0.052255
chr1-231162067-231163651	29028	65	0.168016
chr1-231241051-231241497	7414	1	0.00903901
chr1-231337520-231338636	15924	3	0.0137909
chr1-231420936-231422701	31340	1	0.00101411
chr1-2314276-2315647	25862	34	0.0966878
chr1-231528254-231528862	8868	1	0.00785446
chr1-231626713-231627369	11384	0	0
chr1-23167747-23168947	16248	1	0.00596898
chr1-23177567-23178140	11368	6	0.0420106
chr1-2317877-2318195	6424	53	0.658427
chr1-23216885-23217744	19061	9	0.0334034
chr1-2322285-2323319	14636	102	0.534116
chr1-232629343-232630784	29548	8	0.0192688
chr1-2326659-2326984	4313	36	0.657129
chr1-2327626-2327887	4858	30	0.478809
chr1-232805309-232805961	10998	1	0.00596591
chr1-232950446-232950849	7203	1	0.00965584
chr1-2331746-2332031	3113	23	0.584995
chr1-233295404-233295794	8581	2	0.017466
chr1-233327252-233328765	26741	1	0.00332764
chr1-23343753-23344870	21195	0	0
chr1-2334569-2334993	5178	43	0.642555
chr1-233613699-233614804	15666	14	0.0662465
chr1-23368198-23369557	18640	2	0.00535643
chr1-233904708-233905711	19523	42	0.164258
chr1-234214139-234214725	10740	5	0.0318815
chr1-234231390-234231750	6020	52	0.708905
chr1-23424304-23425170	14780	6	0.0288973
chr1-23436662-23437478	10875	57	0.405253
chr1-234373238-234373755	8536	2	0.0152313
chr1-234478191-234479226	23867	1	0.00183458
chr1-2344920-2345218	4504	41	0.73522
chr1-234599789-234600374	10338	0	0
chr1-234608531-234611278	52102	4	0.00273035
chr1-23483485-23484862	20650	4	0.0112041
chr1-235104240-235104514	4706	0	0
chr1-235128426-235129072	11200	0	0
chr1-235160950-235161402	6922	1	0.00928753
chr1-23530542-23531597	16858	1	0.00272186
chr1-235327024-235328845	29682	1	0.000872525
chr1-235503790-235505319	28452	2	0.00244064
chr1-23554527-23555264	13012	1	0.00745949
chr1-23558352-23558596	3896	0	0
chr1-23559192-23559721	8443	1	0.00796059
chr1-235642019-235642471	5914	3	0.0344849
chr1-235648542-235650766	38803	25	0.0460126
chr1-23568014-23568574	10614	2	0.0119958
chr1-235866288-235867297	18464	0	0
chr1-235993574-235993971	6769	81	0.922475
chr1-236064383-236065517	26217	33	0.0919625
chr1-236141459-236141725	4150	0	0
chr1-236142010-236143374	20679	3	0.00889622
chr1-236281304-236282400	18946	2	0.00540126
chr1-236348054-236348477	7113	79	0.870461
chr1-236395160-236395850	15092	3	0.0131029
chr1-236523772-236524308	8922	0	0
chr1-236604062-236604698	6098	2	0.0225114
chr1-236686173-236687023	17500	39	0.172818
chr1-236795015-236795902	14009	1	0.00423886
chr1-237041827-237043344	29697	28	0.0702115
chr1-2372721-2372937	3121	16	0.430021
chr1-23743206-23744125	23620	1	0.00253056
chr1-23778013-23778773	12777	0	0
chr1-237783888-237784148	3005	31	0.79254
chr1-23790993-23791302	5305	0	0
chr1-23800301-23801059	16031	2	0.0086005
chr1-2384915-2385310	7154	82	0.860388
chr1-23867765-23868500	13429	3	0.0155849
chr1-23902626-23903047	9389	31	0.270738
chr1-2391043-2392325	27322	1	0.00114624
chr1-239386956-239388039	14264	9	0.04582
chr1-23959296-23960211	16328	1	0.00350293
chr1-23979874-23980527	15563	0	0
chr1-239997538-239998316	15825	20	0.0960149
chr1-240091660-240093763	33333	48	0.108997
chr1-2402112-2402733	7708	85	0.856214
chr1-240492875-240493420	7691	80	0.792407
chr1-240823355-240823609	5193	51	0.772249
chr1-2408438-2408807	5558	50	0.725509
chr1-2411947-2413278	27420	3	0.00545937
chr1-241356640-241357490	17267	2	0.00681567
chr1-241424302-241424583	4632	2	0.0291766
chr1-2414453-2414717	3791	0	0
chr1-241519174-241519812	12584	0	0
chr1-241640246-241640590	7704	0	0
chr1-241847850-241848442	9428	0	0
chr1-24187051-24187987	14199	2	0.0109501
chr1-242056983-242057313	4961	37	0.578565
chr1-242057448-242057698	3632	37	0.77623
chr1-242523615-242525380	23824	12	0.034481
chr1-2428488-2428728	4898	46	0.770756
chr1-242890296-242890770	7408	26	0.267068
chr1-243101639-243101894	3533	19	0.439065
chr1-24321713-24322684	14373	8	0.0374634
chr1-243254440-243255473	16638	1	0.00352798
chr1-2433988-2434240	3770	27	0.558146
chr1-243474338-243474840	7533	95	0.955904
chr1-243483093-243483586	9772	12	0.0868537
chr1-243487689-243488227	7718	84	0.807545
chr1-243489112-243489461	4482	50	0.859245
chr1-243849411-243851290	31283	0	0
chr1-243917239-243917791	9298	27	0.221638
chr1-243931454-243931815	4434	27	0.463522
chr1-244047733-244049607	26130	0	0
chr1-244054973-244055236	4377	45	0.810972
chr1-24413368-24413772	7155	2	0.0191996
chr1-24416182-24416549	3839	6	0.108808
chr1-2443380-2444375	18548	22	0.0855228
chr1-244451151-244452299	19892	4	0.012395
chr1-244461200-244461618	8268	2	0.0155687
chr1-244652898-244653778	17354	0	0
chr1-244730140-244731064	16735	11	0.0537438
chr1-244834722-244835840	18364	1	0.00280311
chr1-244862883-244864718	35901	3	0.00506069
chr1-244918662-244919029	7055	1	0.0096814
chr1-244970000-244971409	20325	3	0.00977073
chr1-24502376-24503388	16816	1	0.00575107
chr1-245153246-245156945	59023	22	0.0246985
chr1-245335582-245335916	3480	14	0.336347
chr1-24555949-24556297	8801	3	0.0221693
chr1-245590098-245590334	4413	24	0.417742
chr1-2456231-2456647	5892	22	0.291446
chr1-245685238-245685801	7634	68	0.688718
chr1-245687876-245689212	22990	181	0.617212
chr1-24642537-24643705	20231	1	0.00240413
chr1-246506847-246507466	10879	0	0
chr1-246565906-246566974	15616	2	0.0096388
chr1-246723963-246724726	15663	2	0.0090901
chr1-2467387-2467616	5184	9	0.132375
chr1-246788913-246789209	5803	1	0.0170621
chr1-246931184-246932365	24004	1	0.00162356
chr1-247007567-247008132	8767	9	0.0785324
chr1-247078278-247078899	10180	3	0.0189834
chr1-247103878-247104582	9792	2	0.0125963
chr1-247111284-247112455	21332	21	0.0726685
chr1-247210434-247211002	8524	0	0
chr1-247300547-247301408	10504	140	0.901571
chr1-247330948-247332538	33050	4	0.00832895
chr1-247406014-247406500	4601	55	0.896952
chr1-24744862-24746095	25224	1	0.00128436
chr1-247518098-247518649	12000	97	0.62279
chr1-247530734-247531199	7240	24	0.253684
chr1-247639437-247639839	9155	20	0.16526
chr1-2478354-2478610	4554	25	0.435209
chr1-247857029-247857950	17980	8	0.0315707
chr1-247937024-247937424	7611	63	0.614233
chr1-2479687-2479965	4695	42	0.670708
chr1-24848070-24848876	16449	1	0.00304681
chr1-248691730-248692169	9344	102	0.843451
chr1-248811897-248812318	8747	90	0.793819
chr1-248826252-248826532	4818	1	0.0159793
chr1-248837882-248839111	22498	1	0.00192925
chr1-248847365-248848597	25087	288	0.890208
chr1-248858213-248859220	14338	0	0
chr1-248873210-248873811	7283	1	0.0129853
chr1-248906054-248906791	13066	0	0
chr1-24902006-24902641	9041	82	0.703066
chr1-24907938-24908316	5322	57	0.819223
chr1-24929037-24932514	61042	219	0.280716
chr1-2502148-2502626	7729	56	0.54252
chr1-2503603-2503818	3488	14	0.322796
chr1-2504116-2504389	5030	33	0.51176
chr1-2508359-2508583	3096	26	0.656685
chr1-2508688-2509039	4726	69	1
chr1-2513917-2514209	4863	51	0.787129
chr1-2518484-2518767	4878	47	0.742664
chr1-2519779-2520112	5724	50	0.694206
chr1-25232073-25232687	7457	1	0.00952698
chr1-25239969-25240220	3492	1	0.0221947
chr1-25246476-25248030	28916	3	0.00592846
chr1-2525803-2526820	18883	2	0.00588928
chr1-2529322-2530571	24581	2	0.00285095
chr1-25337796-25338907	13567	1	0.00366359
chr1-2535496-2535773	4358	36	0.635535
chr1-2540657-2541147	9645	1	0.00673785
chr1-25430075-25431624	27374	2	0.00235985
chr1-2546433-2546924	8233	0	0
chr1-25543403-25544551	21357	3	0.00994758
chr1-25616171-25616675	9737	1	0.00652073
chr1-25617484-25618281	15155	24	0.115659
chr1-25800325-25800616	4350	0	0
chr1-25819632-25820884	21848	2	0.0039432
chr1-25858982-25859865	14783	2	0.00780325
chr1-2585959-2587453	26514	4	0.00844455
chr1-25875232-25876025	15251	2	0.00792294
chr1-25905460-25907133	28986	3	0.00415051
chr1-25922715-25923122	8431	4	0.0321205
chr1-2595801-2596064	3993	18	0.339798
chr1-25998059-25998443	5074	1	0.0126877
chr1-26035103-26036217	16163	2	0.00738529
chr1-26045791-26046822	18521	28	0.11016
chr1-2606233-2606447	3808	30	0.616195
chr1-26110829-26112426	28368	3	0.00599479
chr1-26161317-26162115	17085	31	0.140179
chr1-26164032-26164557	9876	5	0.0353842
chr1-26169689-26170333	14026	2	0.00812748
chr1-26225027-26225703	9068	22	0.179928
chr1-26233959-26234537	11972	1	0.00544459
chr1-26279872-26280422	12876	2	0.0097204
chr1-2628454-2629253	11873	18	0.117906
chr1-26306346-26306798	5966	0	0
chr1-26336048-26336975	14863	4	0.0162462
chr1-26345955-26346159	3004	22	0.565822
chr1-26360026-26360790	11922	11	0.066789
chr1-26411092-26411657	9800	10	0.0770102
chr1-2642592-2643425	16036	1	0.00357867
chr1-26432002-26432365	6534	0	0
chr1-26471876-26473351	26835	1	0.00205788
chr1-26500186-26501489	22945	1	0.00185749
chr1-26529581-26530193	13701	0	0
chr1-26620354-26621585	22306	1	0.00189828
chr1-26695343-26697530	38557	0	0
chr1-26787628-26788201	11215	1	0.00571492
chr1-26826740-26827183	8636	1	0.00774419
chr1-26863422-26863637	3163	33	0.73993
chr1-26864576-26865486	13431	0	0
chr1-26889671-26890554	15699	4	0.0170159
chr1-26900002-26900518	6294	1	0.0156708
chr1-26921558-26922128	12677	0	0
chr1-26959575-26960610	16514	8	0.0319382
chr1-26993637-26994655	19337	7	0.0235598
chr1-27006103-27006491	6328	43	0.546096
chr1-27012389-27012950	11514	12	0.0715788
chr1-27154855-27155251	7293	0	0
chr1-27201394-27201594	4341	48	0.854441
chr1-27234215-27235123	18146	2	0.00734019
chr1-27321963-27322515	12689	0	0
chr1-27349429-27351525	33155	251	0.594403
chr1-27356787-27357099	4633	34	0.549814
chr1-27360534-27361252	14070	25	0.137001
chr1-27365922-27366752	12905	4	0.021829
chr1-27383111-27383341	4191	11	0.207498
chr1-27392389-27392845	11011	0	0
chr1-27489832-27490342	9955	2	0.0123205
chr1-27527801-27528452	12653	4	0.0202057
chr1-27547907-27548127	3023	37	0.857607
chr1-27549882-27551036	16601	165	0.766278
chr1-27568417-27569013	10878	3	0.0191257
chr1-27575290-27576177	14968	12	0.0551943
chr1-27603072-27603749	12236	2	0.0102684
chr1-27615355-27615813	7413	71	0.751154
chr1-27634057-27634512	9699	0	0
chr1-27635049-27635299	5031	13	0.190604
chr1-27659795-27660297	10667	1	0.00608314
chr1-27668217-27668520	6846	84	0.926416
chr1-27725635-27726491	17418	2	0.00775709
chr1-27773118-27773520	7154	1	0.00832691
chr1-27830711-27831277	8906	1	0.00780132
chr1-27872521-27872746	4709	0	0
chr1-2789461-2790396	18387	62	0.262592
chr1-27914074-27915024	13456	2	0.0105019
chr1-27958510-27958793	3807	48	0.866966
chr1-27959509-27960327	14438	1	0.00362586
chr1-2800177-2800668	7905	72	0.693982
chr1-28088588-28088801	3991	0	0
chr1-28232635-28233086	6768	1	0.0106788
chr1-28236000-28236465	8211	0	0
chr1-28247191-28247511	3934	1	0.0251119
chr1-28259321-28260622	24776	1	0.00181655
chr1-28328855-28329156	3905	0	0
chr1-28369531-28370220	10495	1	0.00500194
chr1-28518142-28518781	11495	0	0
chr1-28530526-28530799	6077	63	0.793624
chr1-28552891-28553192	7205	2	0.0184308
chr1-2855562-2856100	7335	67	0.703995
chr1-28581558-28582287	13606	0	0
chr1-28592480-28592942	9989	14	0.104838
chr1-28643042-28643386	6179	0	0
chr1-28668660-28669321	10797	2	0.0136243
chr1-28736555-28737803	23936	3	0.00641283
chr1-28775279-28775557	4913	6	0.101784
chr1-28811990-28812836	19164	21	0.0829573
chr1-28862796-28863440	12394	119	0.702765
chr1-28886927-28887788	15577	0	0
chr1-28914257-28915457	19714	5	0.0171388
chr1-2911221-2911729	6476	50	0.606871
chr1-29121188-29125335	75808	95	0.0926055
chr1-29134366-29134660	6037	43	0.564501
chr1-29181465-29182174	17753	3	0.010087
chr1-29230709-29231115	8244	2	0.0155598
chr1-29236234-29238795	46562	38	0.0625717
chr1-29259386-29260086	10372	3	0.0201174
chr1-29260576-29260900	5401	14	0.193059
chr1-2930492-2930723	3707	42	0.833847
chr1-29478451-29478727	4168	1	0.0157167
chr1-2970025-2970358	3925	29	0.563837
chr1-3001802-3002189	4054	24	0.465413
chr1-3012592-3012812	3998	2	0.0395644
chr1-3022070-3022479	4927	28	0.429876
chr1-3062712-3064194	23863	223	0.738777
chr1-3067362-3071398	71042	65	0.0674659
chr1-30718126-30719113	15197	0	0
chr1-30721430-30721740	3839	52	0.946894
chr1-3073467-3074154	13281	38	0.212816
chr1-30807275-30807665	6626	5	0.0514197
chr1-30824436-30824702	5295	2	0.0252021
chr1-3083164-3083414	3362	20	0.458021
chr1-30907998-30909119	16543	6	0.0265826
chr1-31065566-31066091	10972	1	0.00564249
chr1-3111616-3111993	5221	44	0.649196
chr1-31155254-31155646	8752	1	0.00664067
chr1-31181576-31181986	7341	1	0.0132206
chr1-3121504-3121779	3751	28	0.55696
chr1-31239232-31239965	16020	1	0.00397263
chr1-31296400-31297131	9206	1	0.00684847
chr1-3139978-3140208	3416	45	0.876123
chr1-31412948-31414163	22202	8	0.023945
chr1-3155336-3155675	4445	12	0.203325
chr1-31586871-31587170	7785	79	0.789142
chr1-31588741-31589242	9731	16	0.120707
chr1-31617671-31618337	11454	3	0.0165217
chr1-3164371-3164728	4664	53	0.824411
chr1-31644610-31645360	11133	0	0
chr1-31703937-31704268	5131	1	0.0121199
chr1-31714531-31714886	5772	1	0.0109242
chr1-31742886-31743103	4145	34	0.637579
chr1-31762747-31764651	27302	2	0.00464642
chr1-31772227-31773060	13420	7	0.0381789
chr1-31788404-31788752	5066	1	0.0149564
chr1-31789125-31789407	4519	2	0.0307485
chr1-3185977-3186788	10109	76	0.576044
chr1-3188393-3188689	4699	34	0.587333
chr1-31937682-31938781	19046	1	0.004786
chr1-31944588-31945029	7371	0	0
chr1-3194584-3195345	10035	92	0.73891
chr1-32013502-32014982	27930	0	0
chr1-32072605-32073451	14456	1	0.00442136
chr1-32108461-32108717	3361	0	0
chr1-32179554-32180213	14709	0	0
chr1-32200631-32200859	3669	0	0
chr1-32204969-32206284	19349	53	0.209794
chr1-32221921-32222439	7671	2	0.0202086
chr1-32239924-32241540	24758	45	0.139251
chr1-32275110-32275943	14874	110	0.571721
chr1-32291814-32292433	10038	2	0.0118617
chr1-3231282-3231517	4006	21	0.396323
chr1-32335259-32336628	26939	1	0.00120731
chr1-32351115-32351987	14855	6	0.0294621
chr1-32361344-32362416	23420	79	0.266987
chr1-32394170-32394747	8093	1	0.00861767
chr1-3240946-3241736	11574	94	0.629669
chr1-32426828-32427234	5413	5	0.0636106
chr1-32464900-32465460	10824	4	0.0297179
chr1-3247406-3248079	10219	47	0.356781
chr1-32500544-32500962	10217	0	0
chr1-32539400-32540138	11525	0	0
chr1-32650943-32651762	18531	0	0
chr1-3266258-3266652	5383	49	0.711109
chr1-3267983-3268260	4805	46	0.718878
chr1-32702419-32703264	14277	5	0.0235563
chr1-32712271-32712490	4337	3	0.0533301
chr1-32741534-32742273	17498	1	0.0023677
chr1-32753827-32754379	10589	0	0
chr1-3278813-3279488	8886	66	0.58982
chr1-32817075-32818305	20647	3	0.00792531
chr1-32870666-32871157	9789	1	0.00578739
chr1-32886086-32886796	13144	10	0.0496887
chr1-32892869-32893848	14917	2	0.00730654
chr1-32901192-32901721	12369	3	0.0181505
chr1-32963931-32965015	21640	3	0.00950277
chr1-32972858-32973378	10277	8	0.0539814
chr1-33036601-33037118	8539	3	0.0287295
chr1-33080924-33081642	11779	2	0.0106018
chr1-33127291-33127554	4620	1	0.0164879
chr1-33147376-33147720	4120	46	0.835568
chr1-33159659-33159926	4746	72	0.924972
chr1-33180726-33182272	22302	8	0.0244351
chr1-3323352-3323697	4124	19	0.357742
chr1-33255848-33257064	20684	1	0.00192652
chr1-33276174-33276780	10947	126	0.890175
chr1-33306546-33307174	12296	69	0.438455
chr1-33349183-33350169	20272	0	0
chr1-33430402-33431328	19575	5	0.0165448
chr1-33472425-33472727	5341	0	0
chr1-33625006-33625254	3721	37	0.724315
chr1-33633297-33633519	3177	7	0.158554
chr1-3390506-3390721	3342	30	0.695182
chr1-3393539-3394471	13436	28	0.156658
chr1-3404706-3405746	14138	114	0.63343
chr1-3408683-3409115	5012	48	0.771939
chr1-3411428-3412860	20283	167	0.63749
chr1-3414477-3414715	3620	30	0.619254
chr1-3415423-3415663	3837	37	0.748551
chr1-34163183-34165375	29321	23	0.0558279
chr1-34176782-34177423	10447	45	0.340429
chr1-3425449-3425762	4685	39	0.607231
chr1-3425975-3426242	3712	22	0.48056
chr1-3434802-3435068	4277	29	0.526065
chr1-3454342-3455119	14101	4	0.0184514
chr1-34761428-34761675	3810	28	0.590821
chr1-34781276-34781998	12775	6	0.0329958
chr1-3478138-3478627	6857	65	0.756921
chr1-34784818-34785135	4449	33	0.60129
chr1-34792964-34793190	4733	7	0.1094
chr1-34859582-34859949	7448	1	0.0130434
chr1-34865684-34866808	20474	4	0.0123677
chr1-34868704-34868905	5348	47	0.688783
chr1-34885431-34886253	15013	18	0.0904154
chr1-34929210-34930605	21856	2	0.00374412
chr1-34976637-34977276	11757	123	0.81957
chr1-34985049-34985436	8910	0	0
chr1-3500443-3500655	4000	39	0.797266
chr1-35031521-35031986	6495	2	0.0235986
chr1-35079327-35079702	6198	0	0
chr1-3509013-3509233	4180	30	0.575844
chr1-3509798-3510006	4456	33	0.569222
chr1-3510792-3511119	4916	26	0.411312
chr1-35120731-35120990	3949	0	0
chr1-35191867-35192723	16544	1	0.0033168
chr1-35192873-35193210	5303	1	0.0141489
chr1-3519425-3519686	3804	29	0.598374
chr1-35268623-35269254	11232	1	0.00474597
chr1-3530886-3531495	11554	2	0.00974999
chr1-3543311-3543705	5721	36	0.467557
chr1-35557080-35558233	18348	1	0.00237932
chr1-35573249-35574450	25255	151	0.461299
chr1-35576832-35577843	17581	15	0.0638944
chr1-35641369-35641660	4850	1	0.0136555
chr1-35707806-35708378	11590	3	0.0154477
chr1-35718648-35719185	10962	1	0.00501871
chr1-35769324-35770199	15567	0	0
chr1-35807899-35808860	18900	2	0.00594025
chr1-35882901-35883201	6126	4	0.0485738
chr1-35883703-35884069	6134	1	0.0102486
chr1-35930649-35931661	22856	1	0.00166023
chr1-3595146-3595554	4736	35	0.57785
chr1-36083954-36084420	8561	2	0.014522
chr1-36088725-36089354	14339	1	0.00357744
chr1-3611056-3611514	10658	2	0.0121475
chr1-36124855-36125520	15110	15	0.0714117
chr1-36149255-36149861	11042	0	0
chr1-36155851-36156709	19862	1	0.0023458
chr1-36176156-36176860	14648	174	0.922147
chr1-36178355-36179042	11587	131	0.866279
chr1-36224159-36224486	8109	0	0
chr1-3624204-3625677	30860	0	0
chr1-36306230-36307408	21200	5	0.0150341
chr1-36320900-36323801	47538	151	0.24011
chr1-36341762-36341983	3431	41	0.834508
chr1-36385489-36386272	13915	0	0
chr1-36397611-36398002	7446	2	0.0174678
chr1-3643389-3644445	3227	38	0.818684
chr1-36450196-36450723	8843	3	0.0237224
chr1-3645294-3645559	5972	72	0.963336
chr1-36463814-36464530	11206	0	0
chr1-3649781-3653072	54260	39	0.052012
chr1-3690533-3690989	7376	92	0.933045
chr1-37032777-37035023	40872	46	0.0788116
chr1-3706755-3706957	3158	30	0.713438
chr1-3718070-3718537	7215	29	0.315402
chr1-37318011-37318657	8052	15	0.148397
chr1-3732731-3733110	6815	73	0.80307
chr1-3746400-3747406	15782	7	0.0382421
chr1-37474123-37474620	8808	2	0.0170072
chr1-37514312-37514964	12976	1	0.00748749
chr1-37554006-37554222	4879	0	0
chr1-37556852-37557118	3767	21	0.403862
chr1-37595828-37596139	7228	1	0.00904872
chr1-37634006-37635192	20481	24	0.0898748
chr1-37691624-37692914	18979	1	0.00298366
chr1-3771990-3773120	18652	0	0
chr1-37752519-37753223	12683	14	0.0809967
chr1-37753622-37754340	9893	21	0.155765
chr1-37761408-37762069	12203	102	0.676952
chr1-37764167-37765216	13068	40	0.223679
chr1-37793424-37794755	24339	27	0.0800616
chr1-37807737-37808730	21616	0	0
chr1-37859479-37860327	12652	0	0
chr1-3786901-3787344	5556	44	0.614844
chr1-37931565-37932049	8784	0	0
chr1-3795835-3796668	13100	3	0.0167716
chr1-37989561-37990097	5658	0	0
chr1-37995913-37996316	8555	93	0.829948
chr1-38005168-38005699	10983	3	0.0177499
chr1-38012411-38013055	7495	2	0.0178924
chr1-38044431-38047970	64037	31	0.0332685
chr1-3814895-3815451	6475	75	0.909614
chr1-3856624-3857901	21817	4	0.0103823
chr1-38578494-38578861	6187	3	0.0329366
chr1-3858514-3858805	3607	43	0.908551
chr1-38708708-38709268	7112	75	0.778806
chr1-3874301-3875047	3472	54	0.995814
chr1-38804058-38804579	10144	3	0.0181378
chr1-38817938-38818904	17352	31	0.137851
chr1-38859144-38860049	18250	0	0
chr1-38872808-38873677	15424	1	0.00369939
chr1-38990984-38991599	12486	0	0
chr1-3899793-3901520	24142	5	0.0127107
chr1-39080968-39082287	20479	21	0.0740013
chr1-39104994-39106187	23737	6	0.0155363
chr1-39408347-39409567	24342	11	0.0308396
chr1-39490753-39492465	34012	32	0.0681309
chr1-39514694-39516096	4520	4	0.0783902
chr1-39575646-39576995	26054	1	0.00126102
chr1-39639339-39640035	14865	1	0.003899
chr1-39671551-39672415	14090	4	0.0179388
chr1-39683760-39684341	9736	24	0.185492
chr1-39691259-39692842	23076	38	0.124873
chr1-39738641-39739067	6790	4	0.0397414
chr1-39770096-39771518	4508	8	0.136072
chr1-39788012-39789500	31470	51	0.121597
chr1-39883270-39883616	5792	0	0
chr1-39900924-39902541	32972	10	0.0194514
chr1-39954816-39955694	14337	2	0.00777592
chr1-40039740-40041031	20576	2	0.00732489
chr1-40096995-40097456	7728	1	0.00818523
chr1-40132837-40133537	8143	82	0.769708
chr1-40161242-40161940	11569	0	0
chr1-40257715-40258026	3942	0	0
chr1-40258125-40258338	4616	0	0
chr1-40303515-40304199	12019	119	0.757979
chr1-40315333-40315773	7123	0	0
chr1-40316008-40316284	3659	1	0.0209231
chr1-40316549-40317473	17037	2	0.00582597
chr1-40373713-40374350	10302	0	0
chr1-40449934-40450400	10176	0	0
chr1-40477113-40477715	10390	1	0.00629867
chr1-40508385-40509114	12482	0	0
chr1-40531489-40531767	3798	1	0.0174477
chr1-40654183-40654464	3580	27	0.603302
chr1-40665440-40665816	8752	0	0
chr1-40691491-40692303	17505	3	0.00914687
chr1-40783419-40784489	22836	9	0.0275769
chr1-40802248-40802726	9993	2	0.0122294
chr1-40818169-40818919	11249	1	0.00504849
chr1-40819182-40819477	4752	40	0.654279
chr1-40838060-40838764	10560	102	0.735096
chr1-40861278-40862613	25210	32	0.0938071
chr1-40884069-40884621	12096	44	0.287893
chr1-40979199-40980444	26742	8	0.0181627
chr1-41017747-41018021	4629	47	0.722198
chr1-41241286-41242655	26661	1	0.00170873
chr1-4132574-4133183	6601	75	0.88145
chr1-41361009-41362618	30284	2	0.00383539
chr1-41366305-41366870	8250	0	0
chr1-41381582-41383465	25941	9	0.0246788
chr1-41423599-41423954	5480	20	0.277368
chr1-41496180-41496645	9906	2	0.0163863
chr1-41516118-41516372	3185	0	0
chr1-4161328-4161612	3613	24	0.530872
chr1-41661710-41662961	22664	1	0.00168439
chr1-41917970-41918332	6754	1	0.00997089
chr1-42035185-42036309	20866	0	0
chr1-42145815-42146020	4248	53	0.90052
chr1-42334595-42335699	21055	2	0.00417185
chr1-42380308-42381317	20629	5	0.0141303
chr1-42456046-42456904	13446	0	0
chr1-42463127-42463829	8515	16	0.150716
chr1-42658307-42658751	6955	0	0
chr1-42681830-42683345	24324	3	0.0066478
chr1-42766544-42767688	22497	2	0.00555906
chr1-42785092-42785411	6577	20	0.233116
chr1-42816904-42817419	9113	2	0.0142664
chr1-42846588-42846842	5299	0	0
chr1-42888277-42888499	3170	34	0.840474
chr1-42924165-42924880	12030	3	0.0168595
chr1-42957797-42959097	25330	0	0
chr1-43007197-43007663	7446	62	0.642031
chr1-43068220-43068663	9347	3	0.0235124
chr1-43147738-43148171	7136	5	0.0530078
chr1-43171833-43172381	7879	1	0.0116608
chr1-43272814-43273158	5434	48	0.68529
chr1-43304852-43305209	9552	70	0.597634
chr1-43348635-43349606	16143	125	0.597334
chr1-43358464-43359388	13992	2	0.00876794
chr1-43367144-43367402	5458	0	0
chr1-43367876-43368466	10620	0	0
chr1-43389705-43390250	8703	0	0
chr1-43453590-43454143	9987	3	0.0205874
chr1-43530759-43531829	20963	5	0.0147627
chr1-43565616-43566167	11336	20	0.136677
chr1-43591085-43591508	9211	92	0.783492
chr1-43597799-43598086	5818	40	0.553681
chr1-43605222-43605471	3163	21	0.528453
chr1-43649946-43650638	9136	2	0.0138918
chr1-43706998-43708092	22505	3	0.00749041
chr1-43933397-43933863	6719	4	0.0413882
chr1-43936086-43936751	13256	9	0.048703
chr1-43946402-43947132	14095	1	0.00448014
chr1-43969738-43970442	8360	3	0.0254739
chr1-43974471-43975584	20446	1	0.00426537
chr1-43978964-43979950	19487	0	0
chr1-43991479-43992100	12452	0	0
chr1-44029958-44031353	25721	1	0.00117301
chr1-44103320-44103727	4763	38	0.632283
chr1-44213332-44213793	5686	1	0.0131989
chr1-44354986-44355441	9100	0	0
chr1-44405470-44408375	42242	24	0.0395496
chr1-44417465-44418232	15349	15	0.0730817
chr1-44617068-44617613	11628	92	0.616025
chr1-44631610-44632377	16525	0	0
chr1-44654566-44655051	5869	69	0.896065
chr1-44674099-44674912	11559	1	0.00538434
chr1-44724034-44724886	15547	179	0.896892
chr1-44739652-44740073	7671	1	0.0122125
chr1-44775342-44776228	13991	0	0
chr1-44784189-44784680	10214	1	0.00541539
chr1-44786291-44786620	7090	1	0.0090042
chr1-44799863-44801111	21722	10	0.0348843
chr1-44806008-44806646	13704	161	0.903166
chr1-44813094-44813956	16200	93	0.44831
chr1-44842872-44843487	12493	1	0.00778329
chr1-44986351-44986772	6819	0	0
chr1-45010554-45011350	13363	1	0.00421797
chr1-45205668-45206716	20753	1	0.00225515
chr1-45303542-45304245	11742	1	0.00473382
chr1-45326748-45327629	15799	5	0.022769
chr1-45339893-45340311	10317	1	0.00633492
chr1-45490674-45491221	9009	0	0
chr1-45499915-45500377	4912	1	0.0152284
chr1-45521492-45522131	12154	0	0
chr1-45550732-45551022	5250	0	0
chr1-45583919-45584910	16725	0	0
chr1-45622523-45623470	16886	171	0.772808
chr1-45686080-45687408	21460	1	0.00209429
chr1-45750562-45750842	7397	0	0
chr1-45803428-45804148	11380	4	0.0258979
chr1-46132455-46133457	16138	0	0
chr1-46167018-46167260	5040	1	0.013881
chr1-46203150-46203586	6631	3	0.0308842
chr1-46247244-46247773	6507	0	0
chr1-46301754-46303364	30306	3	0.00482525
chr1-46340668-46341164	8665	3	0.0245915
chr1-46394053-46394619	11917	40	0.257884
chr1-46448115-46448671	12567	14	0.085234
chr1-46466625-46467220	11346	7	0.0495253
chr1-46485497-46486120	9412	23	0.184454
chr1-46489122-46491449	32124	46	0.105633
chr1-46532961-46533577	12928	4	0.0197173
chr1-4653930-4656495	49117	47	0.0735208
chr1-46543904-46544460	9729	19	0.156404
chr1-46603944-46604507	9775	0	0
chr1-46612909-46613295	7298	79	0.822252
chr1-46616345-46616905	9180	2	0.0177182
chr1-46668003-46668723	11748	8	0.0512959
chr1-46718731-46719411	14261	0	0
chr1-47023555-47023961	6834	18	0.205873
chr1-4711593-4712485	13298	97	0.552893
chr1-47225309-47226055	13713	7	0.037716
chr1-47230833-47232525	23372	23	0.0727827
chr1-47314036-47314539	8256	0	0
chr1-47333740-47334754	19045	2	0.00494188
chr1-47416225-47417393	24014	51	0.166046
chr1-47433454-47433726	3405	23	0.517422
chr1-47433990-47434713	8190	58	0.551222
chr1-47437122-47439846	49337	50	0.0732
chr1-47444041-47445348	16637	43	0.201213
chr1-47449968-47450280	4014	9	0.171047
chr1-47508038-47508680	11486	2	0.0110282
chr1-47533239-47533555	3874	1	0.0174451
chr1-47593122-47593558	7309	4	0.0422153
chr1-47708823-47710847	29414	24	0.0573248
chr1-47725085-47725377	8143	13	0.11839
chr1-47984199-47984472	6023	1	0.0162596
chr1-47996460-47997929	23048	8	0.024674
chr1-48471633-48472399	10343	1	0.00550439
chr1-48776520-48777138	9026	0	0
chr1-48898883-48899241	5922	46	0.602763
chr1-50023746-50024174	7380	18	0.195386
chr1-50047973-50048648	12444	29	0.181641
chr1-50332996-50333864	14328	6	0.0292128
chr1-50415245-50415844	8102	26	0.251375
chr1-50416213-50416431	4098	1	0.0157954
chr1-50416762-50416988	3296	6	0.140222
chr1-50417326-50417754	6127	5	0.0573994
chr1-50418557-50425799	82436	189	0.172423
chr1-50426810-50427571	9471	23	0.186893
chr1-50427797-50428073	3623	8	0.167336
chr1-50959776-50960398	15667	0	0
chr1-50968091-50969833	27609	3	0.00638652
chr1-50977640-50978364	11652	1	0.0044599
chr1-51236096-51236870	12619	0	0
chr1-51330223-51330917	14223	2	0.00843918
chr1-51344656-51345015	6862	18	0.205239
chr1-51518706-51519224	11461	0	0
chr1-51616903-51617376	5976	0	0
chr1-51729357-51730149	13307	1	0.00462549
chr1-51878507-51879267	10378	1	0.00597039
chr1-51990106-51990781	10266	15	0.108484
chr1-52032781-52033833	15565	2	0.00890474
chr1-52055075-52055452	5837	1	0.0163609
chr1-52056109-52056624	9960	2	0.0121144
chr1-52141729-52142832	22324	3	0.00651845
chr1-52365732-52366388	15734	0	0
chr1-52368468-52368856	7337	0	0
chr1-52404196-52404633	6713	1	0.0108444
chr1-52552587-52553927	21348	1	0.00223621
chr1-52602209-52602936	15145	4	0.0178076
chr1-52632958-52633631	14132	4	0.0186932
chr1-52698017-52698508	10151	0	0
chr1-52726352-52726756	7830	1	0.00748775
chr1-52842623-52843505	18872	10	0.0369158
chr1-52920953-52921851	16045	52	0.254908
chr1-52927209-52927973	10941	2	0.0134571
chr1-53061993-53063302	19445	35	0.137305
chr1-53078433-53079011	7992	71	0.699513
chr1-53092717-53092970	3582	26	0.550935
chr1-53196638-53197143	9665	0	0
chr1-53220225-53220719	9833	0	0
chr1-53238288-53238887	8556	3	0.0226912
chr1-53276626-53277173	16316	192	0.887597
chr1-53326016-53328156	38681	2	0.00359787
chr1-53438468-53439585	20281	226	0.862326
chr1-53459519-53460555	17262	171	0.761934
chr1-53737730-53739637	36049	31	0.0631224
chr1-53838086-53838589	9200	0	0
chr1-53889575-53889983	7484	2	0.0204852
chr1-53945385-53946670	23533	2	0.00322082
chr1-54052929-54053626	10199	0	0
chr1-54121692-54122019	4083	3	0.0624087
chr1-54200149-54200586	8578	1	0.00716892
chr1-54356318-54356660	3861	7	0.141711
chr1-54390729-54390935	3372	50	0.879785
chr1-54405181-54407327	35755	2	0.00282063
chr1-54474674-54475080	7727	3	0.0282897
chr1-54488221-54488583	7932	2	0.0159688
chr1-54489406-54489614	4452	1	0.0141615
chr1-54499351-54499718	6609	9	0.101835
chr1-54542032-54542775	13280	1	0.00419683
chr1-54715673-54716180	8266	2	0.0163375
chr1-54764411-54764696	5657	2	0.0241067
chr1-54781070-54781846	16186	174	0.835111
chr1-54800605-54801385	13929	39	0.220496
chr1-54805993-54806299	6734	73	0.850388
chr1-54886791-54887655	16824	0	0
chr1-54980415-54981173	14212	33	0.176764
chr1-54997016-54997337	5296	3	0.0389334
chr1-55039388-55040342	15535	15	0.0712452
chr1-55214793-55216035	23985	1	0.00155431
chr1-56477556-56477997	6890	0	0
chr1-56578430-56579444	15710	3	0.0123846
chr1-56644991-56645564	12865	2	0.00983315
chr1-5711997-5712453	6285	61	0.736441
chr1-57422292-57424965	34583	25	0.051008
chr1-58249601-58250423	13807	9	0.0481285
chr1-58546250-58546905	11804	2	0.00984646
chr1-58576086-58577623	27540	104	0.293199
chr1-5877098-5877332	3591	40	0.791668
chr1-58781790-58785268	47337	8	0.00948436
chr1-58814569-58814818	5080	60	0.920486
chr1-58815280-58815522	4296	0	0
chr1-58816218-58816563	7229	0	0
chr1-58903700-58904228	9803	1	0.00655621
chr1-59146736-59147051	7278	0	0
chr1-59296431-59297122	11448	0	0
chr1-59814416-59815376	14265	2	0.00789832
chr1-5991536-5993346	31570	4	0.00871901
chr1-59926601-59926911	5196	2	0.0258307
chr1-60073644-60073868	4001	6	0.11146
chr1-6026185-6026434	4072	0	0
chr1-6051550-6051776	3458	31	0.661565
chr1-6071576-6071925	6132	72	0.787289
chr1-61042971-61043734	14530	30	0.149966
chr1-61050255-61051159	17736	6	0.0256375
chr1-61053681-61054299	8039	4	0.0343381
chr1-61076866-61077205	4557	0	0
chr1-61083082-61083750	14579	12	0.0603053
chr1-6127684-6128175	6846	41	0.481627
chr1-6128814-6129060	4193	52	0.860666
chr1-6142059-6142299	3632	34	0.748516
chr1-6148657-6148979	5873	7	0.0843644
chr1-61654203-61654421	3727	39	0.75417
chr1-61724976-61725270	4882	1	0.0132908
chr1-61742156-61743146	17889	4	0.015711
chr1-6179178-6180754	30869	13	0.0290088
chr1-6199119-6199823	12859	0	0
chr1-6205766-6206718	19004	11	0.0397704
chr1-6208761-6209528	14285	5	0.0267019
chr1-62194884-62195274	6205	19	0.231877
chr1-62318466-62319462	16403	21	0.0963525
chr1-6235469-6236201	15147	2	0.00877352
chr1-6241816-6242796	19696	14	0.0519062
chr1-62435981-62437996	31432	2	0.00359703
chr1-6245089-6246403	21269	10	0.031712
chr1-6249104-6250032	20137	26	0.0960976
chr1-6253702-6254079	5835	54	0.685381
chr1-6260078-6260991	16364	0	0
chr1-62687710-62688678	19577	2	0.00722332
chr1-6279889-6280208	4447	49	0.8147
chr1-6281077-6281352	3920	48	0.935981
chr1-63316724-63324800	96753	260	0.205354
chr1-63329693-63330469	12732	22	0.125766
chr1-63367439-63368150	13061	1	0.00412496
[truncated: 22,853 more rows]

## Sheet: WGS_NA12878_Rep1_30X
region	total	error	Methylation
chr1-100037927-100038848	3842	1	0.0179165
chr1-10032475-10033346	3378	0	0
chr1-100352154-100353343	3524	0	0
chr1-100539013-100540329	4536	3	0.0357769
chr1-1019389-1020963	5923	0	0
chr1-10209958-10211248	6379	0	0
chr1-1032587-1034858	8282	11	0.0926637
chr1-10398492-10399940	5782	0	0
chr1-1040117-1044925	13124	110	0.615628
chr1-10430144-10431015	3173	3	0.0634841
chr1-1059057-1059923	3741	1	0.01836
chr1-10638243-10640041	7041	43	0.41086
chr1-1067284-1069938	8831	48	0.404517
chr1-10693717-10695464	5999	7	0.0782136
chr1-107056584-107057788	3866	2	0.0320822
chr1-10793838-10796907	9331	5	0.0403337
chr1-108660972-108661756	3472	0	0
chr1-109041234-109042224	3490	0	0
chr1-109249324-109250101	3229	0	0
chr1-109397453-109398272	3814	0	0
chr1-109466341-109467165	3465	7	0.13821
chr1-109739730-109740684	3556	4	0.0730951
chr1-110067644-110070681	8410	9	0.0715179
chr1-110083907-110084862	3843	0	0
chr1-11012341-11013188	3392	0	0
chr1-110150367-110151642	4893	9	0.125999
chr1-110209635-110212172	9482	4	0.0284629
chr1-110338321-110340178	5430	0	0
chr1-11058974-11060577	5883	2	0.020007
chr1-110606362-110607564	4109	4	0.0667271
chr1-110673623-110675675	7021	17	0.166048
chr1-111139606-111140681	3226	0	0
chr1-111203692-111204681	3274	0	0
chr1-1115136-1117065	7154	4	0.0369171
chr1-111738431-111740655	6599	0	0
chr1-111755420-111756370	3395	0	0
chr1-111981847-111982763	3250	30	0.666132
chr1-111988938-111991151	7670	4	0.0291869
chr1-112508192-112509679	5438	4	0.0465723
chr1-112706721-112707576	3390	1	0.0164924
chr1-112714264-112715438	3846	0	0
chr1-112743705-112744550	3259	12	0.253061
chr1-112955745-112956703	3202	0	0
chr1-113389959-113391448	6065	0	0
chr1-113811752-113812678	3290	0	0
chr1-113929344-113930277	3224	0	0
chr1-114152515-114154050	5472	6	0.0739271
chr1-114510440-114511643	4516	0	0
chr1-11478613-11480554	6814	6	0.0508947
chr1-115337547-115338711	3777	12	0.200157
chr1-115837739-115839743	7571	4	0.0385064
chr1-1162664-1165204	7619	63	0.601475
chr1-116372670-116374191	5706	0	0
chr1-11654161-11655249	4033	2	0.0281555
chr1-116570339-116571261	3335	0	0
chr1-11680343-11681660	4806	2	0.0251351
chr1-11690645-11692594	6123	3	0.0286714
chr1-116909582-116910830	4361	10	0.157134
chr1-117121648-117122526	3205	2	0.0385517
chr1-117366553-117367823	4845	0	0
chr1-117605337-117607046	4526	1	0.0118145
chr1-11805406-11806509	3768	0	0
chr1-119006522-119008697	5765	16	0.176255
chr1-119622680-119624003	4778	58	0.796245
chr1-1200981-1201776	3034	0	0
chr1-12166820-12167655	3642	0	0
chr1-1217143-1217754	3514	28	0.576465
chr1-1231622-1233605	9922	57	0.380483
chr1-1246377-1247090	3619	2	0.0442462
chr1-125085510-125088028	5127	50	0.64123
chr1-125118140-125119694	4122	51	0.810939
chr1-12616979-12618636	4064	0	0
chr1-1273136-1274437	5438	0	0
chr1-1286018-1294783	17358	127	0.533417
chr1-1296482-1298279	4051	46	0.826189
chr1-1307021-1309805	10956	12	0.0739382
chr1-1324264-1325255	4731	0	0
chr1-1332056-1333606	4506	50	0.796553
chr1-1338107-1340460	6159	60	0.728508
chr1-1348554-1351571	6507	4	0.0592381
chr1-13513011-13514118	3615	2	0.0344337
chr1-1354328-1355746	6114	12	0.142971
chr1-13699987-13700705	3209	2	0.050395
chr1-1373761-1375659	6139	20	0.219734
chr1-13748773-13749963	5250	0	0
chr1-1398692-1400222	5966	2	0.0188396
chr1-1406729-1407555	3297	0	0
chr1-1419780-1420620	3639	20	0.361695
chr1-1439082-1440204	5432	52	0.655153
chr1-145858693-145859938	3508	0	0
chr1-145960386-145962107	4592	0	0
chr1-14598115-14599497	4551	1	0.0116808
chr1-1471465-1472441	3389	0	0
chr1-147171892-147172922	3326	0	0
chr1-147242440-147243628	3716	1	0.0187885
chr1-14923878-14925049	4961	2	0.0226589
chr1-149886220-149887920	3990	0	0
chr1-150149506-150150888	5533	0	0
chr1-150234624-150235494	3301	0	0
chr1-150548874-150549892	4071	8	0.135543
chr1-150578853-150579877	3586	0	0
chr1-150974021-150975474	5569	0	0
chr1-151131210-151133624	7949	68	0.609872
chr1-151145574-151146897	3941	11	0.191175
chr1-1511499-1512825	4230	0	0
chr1-151281183-151283293	6182	0	0
chr1-15152724-15154975	7316	2	0.0210561
chr1-151611899-151612729	3544	0	0
chr1-151790129-151791531	3640	0	0
chr1-151837985-151839208	4680	2	0.0256417
chr1-151993182-151994417	3978	1	0.0264152
chr1-152107522-152112739	8495	34	0.260135
chr1-1522575-1523649	3202	33	0.665419
chr1-153260997-153261837	3236	2	0.0443024
chr1-1535225-1536210	3445	27	0.588125
chr1-153678355-153679899	5423	3	0.0329707
chr1-153775180-153776222	3546	0	0
chr1-153945897-153946858	4171	0	0
chr1-1539583-1541289	5226	12	0.160035
chr1-15409555-15410732	4222	0	0
chr1-154220368-154221312	3268	0	0
chr1-154501632-154503223	7003	24	0.21744
chr1-154558206-154559089	3140	0	0
chr1-154936487-154937455	3265	0	0
chr1-154961453-154962259	3449	0	0
chr1-155050513-155051856	4619	0	0
chr1-155062450-155064102	3799	6	0.0952381
chr1-155078680-155082545	11174	3	0.013706
chr1-155125959-155127975	6093	26	0.317033
chr1-155194409-155195369	3287	2	0.03491
chr1-155254834-155255864	3069	2	0.0526657
chr1-155294528-155295745	3233	8	0.171369
chr1-155322679-155325642	8769	7	0.0495263
chr1-155688042-155689334	4403	0	0
chr1-155977888-155978699	3223	0	0
chr1-156053172-156054188	3267	0	0
chr1-156076553-156077593	3846	30	0.521679
chr1-156420612-156421927	3973	0	0
chr1-156435369-156436558	4320	2	0.0248304
chr1-156499826-156501268	5065	0	0
chr1-156623866-156625674	6699	4	0.0438811
chr1-156705067-156706862	4914	1	0.0211039
chr1-156750956-156752277	5222	1	0.0103026
chr1-15684084-15685007	3159	0	0
chr1-156845090-156846000	3082	6	0.121501
chr1-156859013-156861310	5599	7	0.0881992
chr1-157045505-157046163	3269	0	0
chr1-157137958-157138853	3298	0	0
chr1-1574103-1575367	5292	0	0
chr1-15758577-15759367	3056	7	0.158762
chr1-15834766-15836385	4928	0	0
chr1-15847395-15848901	6437	0	0
chr1-15944097-15945087	3386	38	0.791542
chr1-159780627-159781563	3043	0	0
chr1-159854217-159855130	3290	0	0
chr1-1598952-1600756	7590	19	0.153316
chr1-159924540-159925608	3032	0	0
chr1-160083932-160084948	4205	17	0.312454
chr1-161440077-161472713	5983	24	0.296243
chr1-1615074-1616635	6582	7	0.071251
chr1-16154990-16155965	3106	0	0
chr1-161725848-161727508	4919	0	0
chr1-162023233-162024341	3549	4	0.0688978
chr1-16206423-16208085	4782	13	0.193684
chr1-162069429-162070262	3391	0	0
chr1-1623208-1623979	3105	32	0.693259
chr1-162561067-162562063	4008	1	0.0135792
chr1-1626670-1634630	15493	62	0.293563
chr1-16498644-16499882	4547	0	0
chr1-165354955-165357091	5953	2	0.0260686
chr1-165827417-165828446	4640	0	0
chr1-16612962-16613959	14525	2	0.0057872
chr1-166165022-166167211	6740	1	0.0095709
chr1-16644361-16644997	10546	51	0.359286
chr1-16646991-16648550	4668	16	0.251155
chr1-166839105-166840107	3668	0	0
chr1-166920540-166921412	3670	19	0.338814
chr1-167219894-167222124	6897	1	0.00909285
chr1-16724997-16725396	3332	38	0.806027
chr1-167454852-167455979	4619	0	0
chr1-167721742-167722615	3275	0	0
chr1-168136079-168136920	3760	1	0.0143698
chr1-168225708-168226601	3460	0	0
chr1-169105529-169107173	5307	1	0.0101096
chr1-16913544-16914475	3846	5	0.0905267
chr1-169485321-169486339	3144	0	0
chr1-17011335-17012087	3457	0	0
chr1-171841328-171842185	3104	0	0
chr1-173476840-173477966	3589	0	0
chr1-174021668-174022711	3793	0	0
chr1-174159159-174159909	3210	0	0
chr1-17437577-17439981	6649	0	0
chr1-174999354-175000488	4046	0	0
chr1-176206576-176207675	4352	0	0
chr1-1777956-1779143	5388	1	0.0122203
chr1-178542228-178543221	3365	1	0.0163924
chr1-178724834-178726013	3641	0	0
chr1-179025724-179026782	4329	1	0.0156133
chr1-179081941-179082813	3264	0	0
chr1-179742813-179744816	7250	14	0.12952
chr1-179882348-179883236	3159	0	0
chr1-180154421-180155449	3931	0	0
chr1-180228985-180235840	16312	12	0.0510994
chr1-180502191-180503142	3665	1	0.014746
chr1-180631892-180632680	3017	0	0
chr1-180912181-180913283	4504	0	0
chr1-180953780-180954556	3140	3	0.0571282
chr1-181088368-181090040	6688	0	0
chr1-18110058-18111179	3301	0	0
chr1-181104782-181105866	4324	1	0.012316
chr1-182056470-182057376	3306	16	0.314248
chr1-182390563-182392428	6046	2	0.0178329
chr1-182789261-182789962	3227	0	0
chr1-182839178-182839987	3782	0	0
chr1-182952685-182953509	3021	15	0.315593
chr1-183022670-183024235	5919	0	0
chr1-183416866-183418529	4129	18	0.290876
chr1-183635149-183636198	4005	0	0
chr1-184036226-184037632	4816	5	0.0582844
chr1-184386282-184387490	3254	0	0
chr1-184754119-184755304	4359	1	0.0121903
chr1-18482380-18483173	3009	31	0.690292
chr1-184973731-184974645	3141	0	0
chr1-185316198-185317234	3930	0	0
chr1-18630402-18633335	6293	4	0.0364079
chr1-18643055-18644245	3269	0	0
chr1-1889967-1891833	8400	0	0
chr1-18955455-18957389	8014	1	0.00765514
chr1-1908520-1909162	3119	1	0.0223917
chr1-1918660-1919952	4519	5	0.0652576
chr1-193059092-193060141	3065	0	0
chr1-19311714-19312815	4900	0	0
chr1-19485210-19486150	3180	0	0
chr1-19643762-19645429	6590	7	0.0656497
chr1-19664654-19666295	5632	14	0.16973
chr1-197774802-197775658	3520	0	0
chr1-1978830-1982361	3998	43	0.792118
chr1-197910887-197912507	3850	3	0.0515531
chr1-198156767-198157712	3865	1	0.0176843
chr1-19882315-19882969	3659	0	0
chr1-200873069-200874260	4554	18	0.296202
chr1-201023155-201023871	3385	1	0.0316092
chr1-201114331-201115439	4201	12	0.194226
chr1-201283325-201284520	3838	11	0.193902
chr1-201399134-201399904	3407	7	0.118259
chr1-201468392-201469520	3565	1	0.0196144
chr1-201538652-201540189	4533	1	0.0148548
chr1-201647914-201650660	7195	27	0.251028
chr1-2018973-2020040	4133	7	0.105441
chr1-201982458-201983451	3484	1	0.0157309
chr1-202144024-202145015	4061	1	0.0131415
chr1-202642541-202643911	4225	2	0.0377272
chr1-202709796-202710641	3183	1	0.0168646
chr1-202806876-202808599	6240	1	0.00849784
chr1-202810663-202811556	3266	0	0
chr1-202888556-202889266	3171	1	0.0337093
chr1-203305170-203306210	3726	0	0
chr1-20366090-20367041	3925	9	0.145762
chr1-204073118-204075382	7259	7	0.0705424
chr1-204151271-204152433	4186	3	0.0470463
chr1-204685005-204685757	3322	5	0.0959844
chr1-20483970-20487018	8889	5	0.0406461
chr1-2049813-2051773	8456	12	0.0981223
chr1-205210836-205211782	3326	0	0
chr1-205343366-205344448	4212	5	0.0895819
chr1-205455702-205457360	5676	5	0.063021
chr1-20552402-20554002	6798	3	0.0246622
chr1-205568624-205569438	3023	2	0.0363123
chr1-205631366-205632304	3777	1	0.0142592
chr1-205749111-205750217	3222	0	0
chr1-205812743-205813882	4577	0	0
chr1-206506904-206508111	4437	2	0.0274268
chr1-206684882-206686306	4291	0	0
chr1-20717340-20718278	3766	7	0.110476
chr1-20731514-20732873	4342	1	0.0155873
chr1-20786216-20787628	7024	0	0
chr1-208243145-208244284	4245	2	0.0285882
chr1-209937835-209938709	3079	4	0.0827373
chr1-210232599-210233905	4702	0	0
chr1-211133326-211134333	3109	5	0.0932677
chr1-211258764-211260792	5335	0	0
chr1-211326590-211327294	3069	0	0
chr1-211577780-211579835	8241	1	0.0124426
chr1-211830090-211830938	3408	0	0
chr1-212284626-212286352	6511	1	0.00767315
chr1-212558327-212559115	3469	1	0.0158568
chr1-212606810-212609744	8911	0	0
chr1-212699119-212700706	6016	1	0.017149
chr1-212858018-212858777	3746	0	0
chr1-21289888-21290608	3004	0	0
chr1-212950306-212951750	4810	3	0.0453083
chr1-21344868-21345826	3609	0	0
chr1-214280754-214281704	3270	0	0
chr1-214550762-214552185	4415	6	0.0934703
chr1-214608320-214609213	3075	34	0.780701
chr1-217134403-217135837	3848	1	0.0182243
chr1-21782637-21783768	4141	0	0
chr1-218164439-218165691	4029	2	0.0304797
chr1-21936854-21937784	3167	0	0
chr1-2204479-2205912	3958	7	0.124316
chr1-22052517-22053536	4305	0	0
chr1-220528120-220529006	4386	1	0.0122079
chr1-220690166-220690907	3041	2	0.0528107
chr1-220878625-220880331	4814	0	0
chr1-22142420-22143759	4302	2	0.0329005
chr1-221742133-221743462	4101	0	0
chr1-2226774-2229734	10236	6	0.031726
chr1-223363501-223365286	4834	4	0.0691138
chr1-223712289-223713121	3836	0	0
chr1-223845384-223846561	4586	2	0.0310484
chr1-224182884-224184053	5600	0	0
chr1-224615936-224617612	5476	3	0.038795
chr1-225427020-225428810	6366	0	0
chr1-225652569-225654093	5501	2	0.0203344
chr1-225881906-225883198	4272	1	0.012607
chr1-225923943-225924852	3254	8	0.142743
chr1-226061757-226063756	7034	0	0
chr1-226083023-226084140	3999	2	0.0310071
chr1-226109587-226110885	4783	0	0
chr1-226121259-226122775	6108	1	0.00840565
chr1-226223307-226224179	3436	3	0.0579733
chr1-226308661-226309800	4281	1	0.015644
chr1-226548680-226549711	3911	0	0
chr1-226736860-226738852	6850	1	0.00721392
chr1-226870345-226871205	3548	1	0.0297052
chr1-226939369-226940729	4923	0	0
chr1-22710331-22711869	5613	3	0.0382895
chr1-227317746-227319051	4288	4	0.0546557
chr1-227541815-227542791	4051	8	0.128547
chr1-227787595-227788869	3490	1	0.0198785
chr1-227946722-227948581	6623	2	0.0209351
chr1-228006396-228008811	7662	5	0.0456713
chr1-228082029-228083800	6307	0	0
chr1-228101969-228103483	6222	2	0.0186998
chr1-228139808-228140859	4725	0	0
chr1-228157677-228158999	5293	59	0.753909
chr1-228165408-228166285	3390	0	0
chr1-228211771-228214336	8208	51	0.40538
chr1-228275549-228276787	4074	9	0.157399
chr1-228315856-228317061	3465	30	0.57793
chr1-228378249-228379420	3605	7	0.140522
chr1-228406111-228407012	3412	0	0
chr1-228457407-228458733	3362	1	0.0212801
chr1-228486646-228487914	4767	0	0
chr1-228646196-228648421	3757	2	0.029056
chr1-228735064-228736550	5261	8	0.113146
chr1-229342163-229343188	5135	0	0
chr1-229431460-229434937	9361	32	0.221432
chr1-22953061-22954076	3980	10	0.164102
chr1-229558026-229559327	6058	0	0
chr1-229625382-229626552	3984	1	0.0137233
chr1-230066748-230068462	5938	0	0
chr1-23019322-23020184	3885	0	0
chr1-230425358-230426956	5853	1	0.00876198
chr1-2305004-2307630	7704	83	0.76387
chr1-230867886-230868909	3073	1	0.0181572
chr1-230978126-230979127	3781	0	0
chr1-231039317-231041263	5559	5	0.0603598
chr1-231162067-231163651	5950	11	0.137536
chr1-231420936-231422701	5630	0	0
chr1-2314276-2315647	5397	12	0.155331
chr1-23216885-23217744	3736	1	0.0182398
chr1-2322285-2323319	3189	25	0.545852
chr1-232629343-232630784	6195	3	0.0396575
chr1-233327252-233328765	5163	0	0
chr1-23343753-23344870	3840	0	0
chr1-23368198-23369557	3822	1	0.0182876
chr1-233904708-233905711	3953	11	0.174927
chr1-234478191-234479226	4516	1	0.0152729
chr1-234608531-234611278	10414	2	0.00996029
chr1-23483485-23484862	3674	0	0
chr1-23530542-23531597	3573	1	0.019305
chr1-235327024-235328845	6120	0	0
chr1-235503790-235505319	5811	0	0
chr1-235648542-235650766	7894	2	0.0145142
chr1-235866288-235867297	3873	0	0
chr1-236064383-236065517	5294	5	0.0533567
chr1-236142010-236143374	4208	0	0
chr1-236281304-236282400	3956	1	0.0134664
chr1-236686173-236687023	3466	9	0.158089
chr1-237041827-237043344	6209	4	0.0431938
chr1-23743206-23744125	4999	0	0
chr1-23800301-23801059	3029	1	0.0183793
chr1-2391043-2392325	5286	0	0
chr1-23959296-23960211	3354	0	0
chr1-23979874-23980527	3135	0	0
chr1-239997538-239998316	3467	9	0.176992
chr1-240091660-240093763	6918	14	0.140702
chr1-2411947-2413278	5532	2	0.0213751
chr1-241356640-241357490	3688	2	0.033334
chr1-242523615-242525380	4779	1	0.0140812
chr1-243254440-243255473	3614	0	0
chr1-243849411-243851290	5972	0	0
chr1-244047733-244049607	5103	0	0
chr1-2443380-2444375	3681	4	0.0699005
chr1-244451151-244452299	3875	0	0
chr1-244652898-244653778	3150	0	0
chr1-244730140-244731064	3537	5	0.112395
chr1-244834722-244835840	4068	0	0
chr1-244862883-244864718	7119	1	0.0069442
chr1-244970000-244971409	4195	0	0
chr1-24502376-24503388	3646	0	0
chr1-245153246-245156945	12319	7	0.0411187
chr1-245687876-245689212	4766	36	0.549325
chr1-24642537-24643705	4700	0	0
chr1-246565906-246566974	3433	0	0
chr1-246723963-246724726	3363	0	0
chr1-246931184-246932365	5232	0	0
chr1-247111284-247112455	4485	4	0.0535247
chr1-247330948-247332538	6729	0	0
chr1-24744862-24746095	5296	0	0
chr1-247857029-247857950	3625	2	0.0398633
chr1-24848070-24848876	3632	0	0
chr1-248837882-248839111	4729	0	0
chr1-248847365-248848597	4981	60	0.770766
chr1-248858213-248859220	3048	0	0
chr1-24929037-24932514	12208	44	0.264118
chr1-25246476-25248030	5662	1	0.00933467
chr1-2525803-2526820	3843	1	0.0140052
chr1-2529322-2530571	4881	0	0
chr1-25430075-25431624	4959	1	0.013287
chr1-25543403-25544551	4657	1	0.0115903
chr1-25819632-25820884	4438	0	0
chr1-25858982-25859865	3035	0	0
chr1-2585959-2587453	5366	0	0
chr1-25875232-25876025	3232	1	0.0171618
chr1-25905460-25907133	5624	1	0.0094517
chr1-26035103-26036217	3053	0	0
chr1-26045791-26046822	4062	2	0.0265253
chr1-26110829-26112426	5898	1	0.0178799
chr1-26161317-26162115	3353	2	0.0370596
chr1-26336048-26336975	3216	1	0.0216669
chr1-2642592-2643425	3145	0	0
chr1-26471876-26473351	5587	0	0
chr1-26500186-26501489	4600	0	0
chr1-26620354-26621585	4309	1	0.0123881
chr1-26695343-26697530	7141	0	0
chr1-26889671-26890554	3175	1	0.0176124
chr1-26959575-26960610	3249	2	0.0337275
chr1-26993637-26994655	4051	1	0.0168904
chr1-27234215-27235123	3889	0	0
chr1-27349429-27351525	6755	46	0.474256
chr1-27549882-27551036	3373	25	0.549869
chr1-27725635-27726491	3552	2	0.0322806
chr1-2789461-2790396	3892	9	0.162757
chr1-28259321-28260622	4667	0	0
chr1-28736555-28737803	4610	0	0
chr1-28811990-28812836	4205	8	0.126329
chr1-28886927-28887788	3127	0	0
chr1-28914257-28915457	3597	2	0.0343335
chr1-29121188-29125335	15238	21	0.0973571
chr1-29181465-29182174	3020	0	0
chr1-29236234-29238795	9230	11	0.0689556
chr1-3062712-3064194	4518	41	0.618378
chr1-3067362-3071398	14029	12	0.0513173
chr1-30907998-30909119	3378	1	0.016152
chr1-31239232-31239965	3513	0	0
chr1-31412948-31414163	4387	7	0.111802
chr1-31762747-31764651	4990	1	0.0106613
chr1-31937682-31938781	3292	1	0.0321875
chr1-32013502-32014982	5713	0	0
chr1-32204969-32206284	3591	15	0.291908
chr1-32239924-32241540	4774	7	0.0880734
chr1-32335259-32336628	5321	0	0
chr1-32351115-32351987	3117	2	0.0403659
chr1-32361344-32362416	5154	20	0.244158
chr1-32650943-32651762	3885	1	0.0180872
chr1-32741534-32742273	3173	0	0
chr1-32817075-32818305	4172	0	0
chr1-32963931-32965015	4324	0	0
chr1-33180726-33182272	4268	2	0.028593
chr1-33255848-33257064	4255	1	0.0158475
chr1-33349183-33350169	3843	0	0
chr1-33430402-33431328	3597	1	0.0150636
chr1-3411428-3412860	4284	28	0.428736
chr1-34163183-34165375	5998	2	0.0193951
chr1-34865684-34866808	4216	1	0.024864
chr1-34885431-34886253	3027	0	0
chr1-34929210-34930605	4173	1	0.0131075
chr1-35191867-35192723	3405	0	0
chr1-35557080-35558233	3474	0	0
chr1-35573249-35574450	5378	25	0.338395
chr1-35576832-35577843	3996	3	0.0458167
chr1-35769324-35770199	3003	0	0
chr1-35807899-35808860	3700	1	0.0184347
chr1-35930649-35931661	4405	0	0
chr1-36155851-36156709	4071	0	0
chr1-3624204-3625677	6881	0	0
chr1-36306230-36307408	4329	2	0.0366096
chr1-36320900-36323801	9742	34	0.231745
chr1-3649781-3653072	10758	3	0.015104
chr1-37032777-37035023	8615	9	0.0663246
chr1-37634006-37635192	4060	9	0.166759
chr1-37691624-37692914	3930	1	0.0135234
chr1-3771990-3773120	3657	0	0
chr1-37793424-37794755	5127	5	0.0630276
chr1-37807737-37808730	4275	0	0
chr1-38044431-38047970	13393	6	0.0271569
chr1-3856624-3857901	4568	0	0
chr1-38817938-38818904	3801	10	0.211792
chr1-38859144-38860049	3678	0	0
chr1-38872808-38873677	3033	0	0
chr1-3899793-3901520	4903	4	0.0552477
chr1-39080968-39082287	4445	7	0.101158
chr1-39104994-39106187	4512	1	0.0147917
chr1-39408347-39409567	5315	3	0.0309721
chr1-39490753-39492465	7264	3	0.0258565
chr1-39575646-39576995	5253	0	0
chr1-39691259-39692842	4595	6	0.0871295
chr1-39788012-39789500	6664	7	0.0642496
chr1-39900924-39902541	6713	3	0.0254008
chr1-40039740-40041031	3947	0	0
chr1-40316549-40317473	3282	0	0
chr1-40691491-40692303	3793	1	0.0141246
chr1-40783419-40784489	4535	3	0.0397033
chr1-40861278-40862613	5044	9	0.113543
chr1-40979199-40980444	5528	3	0.0349677
chr1-41241286-41242655	5586	1	0.00960181
chr1-41361009-41362618	6314	0	0
chr1-41381582-41383465	5616	2	0.020098
chr1-41661710-41662961	4727	0	0
chr1-42035185-42036309	4101	0	0
chr1-42334595-42335699	4568	0	0
chr1-42380308-42381317	4418	0	0
chr1-42681830-42683345	4617	1	0.0144962
chr1-42766544-42767688	4349	0	0
chr1-42957797-42959097	5711	0	0
chr1-43348635-43349606	3003	28	0.617548
chr1-43530759-43531829	3926	1	0.0173308
chr1-43706998-43708092	4569	1	0.0116763
chr1-43974471-43975584	3961	0	0
chr1-43978964-43979950	3780	0	0
chr1-44029958-44031353	5455	0	0
chr1-44405470-44408375	7971	8	0.0617797
chr1-44417465-44418232	3143	6	0.112317
chr1-44631610-44632377	3178	0	0
chr1-44724034-44724886	3240	36	0.729188
chr1-44799863-44801111	3983	3	0.0550278
chr1-44813094-44813956	3169	13	0.285868
chr1-45205668-45206716	4667	0	0
chr1-45326748-45327629	3728	0	0
chr1-45583919-45584910	3330	0	0
chr1-45622523-45623470	3652	37	0.69864
chr1-45686080-45687408	3817	0	0
chr1-46132455-46133457	3346	0	0
chr1-46301754-46303364	6138	0	0
chr1-46489122-46491449	6616	3	0.0323699
chr1-4653930-4656495	9948	10	0.0684539
chr1-46718731-46719411	3349	0	0
chr1-47230833-47232525	4490	9	0.122194
chr1-47333740-47334754	3974	0	0
chr1-47416225-47417393	4876	9	0.11207
chr1-47437122-47439846	9973	14	0.0922747
chr1-47444041-47445348	3411	9	0.205154
chr1-47708823-47710847	5623	1	0.0117279
chr1-47996460-47997929	4531	1	0.0116061
chr1-50418557-50425799	16404	42	0.174452
chr1-50959776-50960398	3400	0	0
chr1-50968091-50969833	5487	1	0.00961502
chr1-52032781-52033833	3568	0	0
chr1-52141729-52142832	4476	2	0.026941
chr1-52365732-52366388	3010	0	0
chr1-52552587-52553927	4481	0	0
chr1-52602209-52602936	3242	0	0
chr1-52842623-52843505	3743	1	0.018528
chr1-52920953-52921851	3037	11	0.245601
chr1-53061993-53063302	3822	8	0.140671
chr1-53276626-53277173	3345	37	0.730107
chr1-53326016-53328156	8240	0	0
chr1-53438468-53439585	4339	47	0.714874
chr1-53459519-53460555	3312	24	0.494342
chr1-53737730-53739637	6979	2	0.0167448
chr1-53945385-53946670	4962	1	0.0135679
chr1-54405181-54407327	7217	1	0.00685415
chr1-54781070-54781846	3432	39	0.76665
chr1-54886791-54887655	3306	0	0
chr1-55039388-55040342	3474	2	0.033024
chr1-55214793-55216035	4884	0	0
chr1-56578430-56579444	3029	0	0
chr1-57422292-57424965	6771	6	0.0570804
chr1-58249601-58250423	3038	6	0.112817
chr1-58576086-58577623	5154	13	0.163115
chr1-58781790-58785268	9647	4	0.0226318
chr1-5991536-5993346	6445	0	0
chr1-61050255-61051159	3411	2	0.042144
chr1-61083082-61083750	3098	5	0.0965031
chr1-61742156-61743146	3628	0	0
chr1-6179178-6180754	5844	2	0.0240791
chr1-6205766-6206718	3638	4	0.0838544
chr1-6208761-6209528	3011	2	0.037998
chr1-6235469-6236201	3250	0	0
chr1-6241816-6242796	3682	3	0.0582891
chr1-62435981-62437996	6358	1	0.00806443
chr1-6245089-6246403	4620	1	0.0145704
chr1-6249104-6250032	4168	5	0.0722992
chr1-6260078-6260991	3492	0	0
chr1-62687710-62688678	4185	1	0.0127658
chr1-63316724-63324800	18886	46	0.169381
chr1-63593267-63594242	3325	1	0.0164842
chr1-63773795-63775108	4542	0	0
chr1-6392960-6394125	4343	1	0.0121736
chr1-6418998-6420878	7080	11	0.0918205
chr1-6424444-6425267	3315	2	0.0532324
chr1-64469872-64470931	3927	1	0.0172608
chr1-6447148-6449126	6633	1	0.00800679
chr1-6454049-6455985	6944	15	0.143015
chr1-6460525-6461895	3807	32	0.580003
chr1-64744600-64745555	3900	0	0
chr1-64965773-64966931	3355	0	0
chr1-65066588-65068282	6320	3	0.0277038
chr1-65147359-65149215	6266	2	0.0177231
chr1-65525319-65526128	3496	10	0.18369
chr1-6601717-6603784	7744	0	0
chr1-6612727-6615681	10555	1	0.00516273
chr1-6701236-6702071	3604	0	0
chr1-67429453-67431143	4811	0	0
chr1-67685231-67686587	4932	0	0
chr1-67832689-67833768	3423	0	0
chr1-6784254-6786306	7050	0	0
chr1-69567285-69568812	4075	2	0.0353917
chr1-71046542-71048121	4269	8	0.118458
chr1-7663341-7665115	4218	29	0.532897
chr1-7680084-7681057	3115	3	0.0558404
chr1-76867427-76868849	3230	3	0.0716601
chr1-7704114-7705796	8076	13	0.099268
chr1-77281689-77282539	3208	2	0.0452925
chr1-77682533-77683733	3239	0	0
chr1-7770992-7771786	3065	0	0
chr1-7783401-7785044	6136	21	0.249556
chr1-8025495-8026794	6142	8	0.0829612
chr1-81800314-81803363	8485	8	0.0714929
chr1-83998541-83999549	3042	2	0.0415528
chr1-84077464-84078578	3980	1	0.0173254
chr1-8423330-8424279	3392	1	0.0313222
chr1-84505662-84506808	4089	1	0.0168227
chr1-85047827-85048872	3588	0	0
chr1-85200136-85201967	6938	0	0
chr1-85276183-85276852	3107	0	0
chr1-85464258-85465485	3986	5	0.0781353
chr1-85580680-85581557	3317	1	0.0164624
chr1-86704193-86705332	4264	0	0
chr1-86914480-86915531	3053	0	0
chr1-87328120-87329459	4346	0	0
chr1-88683933-88685035	3732	0	0
chr1-8878255-8879287	4060	0	0
chr1-89524252-89525427	4563	0	0
chr1-89632672-89633733	4393	0	0
chr1-89820631-89821928	4463	2	0.02701
chr1-89994841-89995678	3591	0	0
chr1-9039222-9040454	3955	44	0.712166
chr1-90716541-90718983	7233	24	0.214812
chr1-90724933-90727247	4417	16	0.25404
chr1-90850693-90851833	4140	0	0
chr1-9128445-9129417	3007	0	0
chr1-9182109-9183768	5955	10	0.113653
chr1-91885357-91886528	4315	1	0.0157933
chr1-9234343-9235393	3792	1	0.0143536
chr1-923591-926252	9948	7	0.0467185
chr1-92480310-92487052	17450	61	0.234289
chr1-92784382-92785539	4146	1	0.0130279
chr1-9292331-9293834	5550	3	0.0289379
chr1-92960956-92962197	4634	0	0
chr1-93180116-93180914	3124	0	0
chr1-93447913-93448967	3900	0	0
chr1-93680766-93681948	4755	1	0.0111932
chr1-93846289-93847530	4294	0	0
chr1-93908814-93909911	4443	0	0
chr1-940226-942983	9478	2	0.0116203
chr1-94237135-94237788	3096	2	0.0405711
chr1-94417970-94418846	3369	0	0
chr1-94926282-94927560	4849	1	0.010991
chr1-9539292-9540385	4618	0	0
chr1-9588675-9589459	3677	0	0
chr1-958934-967274	22095	108	0.352283
chr1-9651675-9652943	4497	0	0
chr1-9689238-9690170	3478	8	0.153481
chr1-976047-979425	4829	40	0.58793
chr1-98053446-98054427	3617	1	0.0191687
chr1-9822954-9824609	6135	1	0.0105826
chr1-9909788-9910631	3527	0	0
chr1-998008-1002030	15979	3	0.00896011
chr1-9997210-9998050	3687	11	0.211126
chr10-100009557-100010241	3124	0	0
chr10-100346426-100347965	4652	2	0.0230697
chr10-100654669-100656723	5641	5	0.0609748
chr10-100729587-100731254	4620	18	0.269894
chr10-100744157-100746389	6334	4	0.0419703
chr10-100747726-100749889	5361	9	0.114783
chr10-100826369-100829867	9891	0	0
chr10-100986777-100987744	3213	4	0.0731894
chr10-100996950-101000041	9112	2	0.0230349
chr10-101060732-101063117	6736	4	0.0394434
chr10-101066173-101067794	3676	2	0.0335343
chr10-101133904-101135302	4283	4	0.0636721
chr10-101145958-101146936	3115	3	0.0647145
chr10-101216213-101218339	5326	12	0.146436
chr10-101222546-101230435	18960	37	0.128478
chr10-101353767-101354657	3148	0	0
chr10-101694223-101695357	4489	0	0
chr10-101775639-101776748	3629	1	0.015017
chr10-101779082-101780231	3338	1	0.0211052
chr10-102065138-102066021	3629	0	0
chr10-102132903-102133833	3439	0	0
chr10-102230457-102232072	5216	3	0.0330749
chr10-102240498-102241984	4502	7	0.102117
chr10-102393973-102395800	5766	0	0
chr10-102420722-102422285	5409	0	0
chr10-102450339-102451228	3598	0	0
chr10-102642065-102645211	9805	2	0.0106656
chr10-102713643-102714954	3997	1	0.0136736
chr10-102917559-102919555	6415	11	0.111671
chr10-103192486-103193475	4238	0	0
chr10-103276872-103278327	5486	8	0.0906248
chr10-103493435-103494671	4589	3	0.0428748
chr10-103584417-103585282	3403	28	0.581048
chr10-103854754-103855736	3382	1	0.0205082
chr10-103967032-103967668	3598	1	0.0193677
chr10-104337838-104338798	3289	0	0
chr10-104639810-104643054	8754	10	0.0708713
chr10-1048398-1049654	4708	0	0
chr10-1056205-1057401	3654	0	0
chr10-107164023-107165047	4114	5	0.073081
chr10-109923018-109923725	3050	0	0
chr10-110007330-110008597	4860	1	0.0108814
chr10-11017480-11018794	6221	3	0.0281422
chr10-110207671-110210965	7562	0	0
chr10-110497406-110498926	6164	0	0
chr10-110567315-110568430	3126	0	0
chr10-110643196-110644570	4629	0	0
chr10-110871657-110872718	4671	1	0.0114213
chr10-110918550-110920136	4425	0	0
chr10-111076233-111079545	10828	53	0.351084
chr10-113679249-113680437	3348	0	0
chr10-114043325-114045709	9315	29	0.201124
chr10-114403633-114404840	4369	2	0.0278515
chr10-114821573-114822675	3710	0	0
chr10-115092503-115094335	5831	0	0
chr10-11610836-11611963	4552	2	0.0351542
chr10-116271068-116274718	9319	11	0.0790449
chr10-116741358-116743195	6935	2	0.0147761
chr10-117136453-117138526	6208	9	0.0966949
chr10-117139695-117140818	3240	6	0.13151
chr10-117162841-117164009	4123	3	0.0479872
chr10-117167511-117168621	3248	6	0.110424
chr10-117240925-117242019	4453	4	0.0508423
chr10-117374293-117376121	7018	2	0.021791
chr10-11742016-11742938	3392	2	0.0367779
chr10-117534407-117538164	9225	11	0.0799807
chr10-117541811-117545857	9995	15	0.0957036
chr10-11823127-11823985	3837	2	0.0320433
chr10-118594181-118596309	5926	31	0.374169
chr10-11869556-11870433	3857	34	0.591308
chr10-118754517-118755596	3923	0	0
chr10-119029278-119030869	7009	0	0
chr10-119080081-119080968	3839	0	0
chr10-119103899-119104892	3438	0	0
chr10-119206616-119207481	3754	0	0
chr10-119541967-119543657	7603	0	0
chr10-119596302-119597446	3233	0	0
chr10-119651055-119652315	5637	2	0.0247074
chr10-119725552-119726619	4483	1	0.0118807
chr10-119818018-119818873	3173	27	0.576669
chr10-119872143-119873592	5473	0	0
chr10-12042238-12043432	3518	0	0
chr10-120456748-120457865	4504	5	0.0736496
chr10-12129227-12130039	3951	1	0.0135681
chr10-121597103-121598771	7108	11	0.119298
chr10-121927458-121928594	4539	1	0.0149666
chr10-122112605-122113947	4176	3	0.0474356
chr10-122374480-122375417	4017	0	0
chr10-122460823-122462724	6526	5	0.0439638
chr10-122879228-122880277	3550	4	0.0660782
chr10-123008243-123009381	3447	2	0.0420525
chr10-123134560-123137850	10647	18	0.109704
chr10-123147768-123151519	9090	15	0.100943
chr10-123154116-123155210	3704	0	0
chr10-12348804-12350590	6907	1	0.0071194
chr10-123666015-123667126	4349	23	0.36743
chr10-124091636-124093717	7953	2	0.0138439
chr10-124418250-124419293	3966	1	0.0137024
chr10-124447241-124450327	8324	9	0.0652049
chr10-124742746-124744451	5855	1	0.00876422
chr10-124916552-124917643	4851	0	0
chr10-125151223-125152465	4276	29	0.442091
chr10-125158656-125162758	11890	14	0.068877
chr10-125895681-125896969	9445	70	0.463549
chr10-126387587-126388913	4264	12	0.194477
chr10-126905041-126906479	4868	11	0.170173
chr10-127195242-127196565	4124	4	0.0736202
chr10-127736147-127739102	8127	34	0.29136
chr10-128125550-128126698	3312	0	0
chr10-128149465-128150835	4166	21	0.352349
chr10-128210295-128211356	3912	4	0.0721738
chr10-129466685-129467446	3207	1	0.021891
chr10-129958427-129960523	6408	20	0.213325
chr10-129962906-129973432	27038	57	0.143171
chr10-130110468-130111622	3558	0	0
chr10-130189948-130191068	4133	12	0.190319
chr10-131310931-131312789	7319	2	0.015251
chr10-131900493-131901844	5688	0	0
chr10-131981395-131983094	7011	7	0.065599
chr10-132036173-132037322	4187	2	0.0412444
chr10-132185409-132187996	8441	25	0.21225
chr10-132306944-132308918	6243	6	0.0606889
chr10-132395864-132397560	6084	3	0.0401672
chr10-132404765-132406111	5235	51	0.713781
chr10-132536799-132538191	5855	2	0.023882
chr10-132690917-132692064	3178	34	0.703802
chr10-132783854-132789145	20720	49	0.15977
chr10-132942160-132943348	4035	8	0.126801
chr10-133021173-133022395	3609	32	0.649965
chr10-133087695-133089115	5866	12	0.128285
chr10-133128422-133129497	3942	39	0.683589
chr10-133160027-133160807	3410	0	0
chr10-133229718-133231488	7802	15	0.114402
chr10-133235294-133238573	10027	25	0.168141
chr10-133308488-133309605	4749	6	0.0883457
chr10-133325179-133326213	4092	2	0.0349435
chr10-133334693-133337061	8014	18	0.151165
chr10-133357142-133358450	3988	12	0.209776
chr10-133372839-133373677	3029	0	0
chr10-133378091-133379803	5754	0	0
chr10-133459497-133460181	3125	22	0.52735
chr10-13347206-13348940	6016	0	0
chr10-133527752-133529057	4320	10	0.163874
chr10-133565380-133566263	3347	30	0.603791
chr10-134643-136512	7511	1	0.00666516
chr10-13528129-13529395	4967	4	0.0508544
chr10-1362465-1364024	7110	72	0.704485
chr10-13656563-13657540	4019	37	0.587292
chr10-14603754-14604706	3939	0	0
chr10-14837771-14839042	4372	0	0
chr10-14878322-14879689	5481	0	0
chr10-15167826-15168715	3924	1	0.0175333
chr10-15370421-15371463	4093	0	0
chr10-16519606-16521720	5930	2	0.0264795
chr10-17228432-17230618	6670	2	0.0163393
chr10-1736591-1737824	3493	0	0
chr10-17453409-17454722	4498	3	0.0387464
chr10-17616667-17617640	3533	1	0.0153065
chr10-18140197-18141291	3928	3	0.0439942
chr10-19815523-19817176	4211	4	0.0648335
chr10-21173200-21174879	5790	4	0.0386097
chr10-21494270-21497491	9838	1	0.00516102
chr10-21508704-21510412	4394	40	0.630777
chr10-21516269-21517701	3474	1	0.0157556
chr10-21525858-21527599	5646	0	0
chr10-21533922-21535481	5301	2	0.020986
chr10-22003046-22003968	3093	0	0
chr10-22252504-22253810	5098	5	0.0692474
chr10-22320420-22322208	5788	0	0
chr10-22334422-22336708	7663	32	0.273488
chr10-22340432-22341399	4359	1	0.015303
chr10-22345072-22345933	3358	9	0.175625
chr10-22436563-22437835	4552	0	0
chr10-22475780-22478121	7433	26	0.240617
chr10-22713227-22714398	4340	0	0
chr10-23173296-23174960	5449	12	0.149762
chr10-23191769-23193526	6459	8	0.0795232
chr10-23438908-23440594	7542	0	0
chr10-23694438-23696049	5142	3	0.0336229
chr10-24722669-24724887	6886	1	0.0150781
chr10-24952182-24952852	3193	0	0
chr10-25174498-25176710	6281	10	0.10016
chr10-25933993-25935093	3460	8	0.136514
chr10-26215455-26218505	8125	13	0.113184
chr10-26697214-26698159	3245	0	0
chr10-26860238-26861300	3061	0	0
chr10-27741254-27746282	14029	13	0.0645479
chr10-28532261-28534163	7582	0	0
chr10-28676776-28678337	6256	1	0.00821442
chr10-29735144-29737148	7781	4	0.0315647
chr10-30058671-30059719	4000	9	0.149046
chr10-30433450-30434778	5249	0	0
chr10-3066459-3069227	10857	5	0.0355847
chr10-31031555-31032429	3146	1	0.0175141
chr10-31318299-31321165	9246	3	0.0227844
chr10-31759328-31760495	3409	0	0
chr10-31928340-31929464	4033	0	0
chr10-32055623-32056642	3597	0	0
chr10-32346290-32347727	5676	0	0
chr10-32957344-32958779	5516	2	0.020347
chr10-33334193-33337269	8111	9	0.0747248
chr10-34814197-34816315	6285	4	0.0386967
chr10-35126561-35127757	4469	0	0
chr10-35336122-35337612	6284	0	0
chr10-35639383-35642965	11971	15	0.089872
chr10-37680209-37681422	3201	27	0.58922
chr10-3784662-3785934	4399	1	0.0151951
chr10-38729964-38730957	3770	34	0.583479
chr10-42111034-42113380	4463	46	0.722736
chr10-42149374-42150964	4312	35	0.550649
chr10-42241839-42243690	3985	34	0.526558
chr10-42753076-42755464	7396	4	0.036324
chr10-42898029-42898969	3043	10	0.189285
chr10-42932720-42934012	3371	4	0.0905326
chr10-43076557-43077986	5118	9	0.122756
chr10-43137519-43138774	4282	3	0.0532048
chr10-43229081-43230165	4519	8	0.12318
chr10-43266476-43267233	3125	6	0.114598
chr10-43396099-43397469	4656	5	0.0728102
chr10-43407133-43409344	6925	1	0.00737219
chr10-43648409-43649250	3211	1	0.0214025
chr10-43689592-43690684	3216	3	0.0559514
chr10-44384267-44386943	7128	5	0.0452727
chr10-45373271-45374708	4228	1	0.0126907
chr10-45443179-45444231	3693	29	0.559312
chr10-45672230-45673194	3738	2	0.0427734
chr10-46556322-46557169	3896	6	0.0912562
chr10-47300042-47300950	4026	5	0.0810703
chr10-47384165-47384902	3099	0	0
chr10-48306289-48307357	4502	0	0
chr10-48450182-48451158	3445	34	0.680185
chr10-48523405-48524593	4251	4	0.0711097
chr10-48655576-48656556	3419	10	0.221703
chr10-49394944-49398737	8673	17	0.135795
chr10-49609556-49612310	9162	30	0.204064
chr10-49761613-49762559	3136	9	0.176387
chr10-50622713-50625395	9295	2	0.0115225
chr10-5666018-5666835	3602	1	0.0150502
chr10-5684493-5685734	4093	0	0
chr10-5812744-5814002	4975	2	0.0227805
chr10-58267248-58269481	5713	0	0
chr10-58512741-58513696	3450	0	0
chr10-5888952-5890674	7774	0	0
chr10-59176068-59177289	4208	11	0.203944
chr10-59708853-59710241	4330	1	0.02448
chr10-5976982-5978171	5656	2	0.027778
chr10-59905899-59907036	3617	0	0
chr10-6089030-6089811	3164	0	0
chr10-60943550-60944532	3450	1	0.0156564
chr10-6144558-6145892	5199	2	0.022689
chr10-6201013-6204494	11154	5	0.0419862
chr10-62804676-62806058	4943	0	0
chr10-62814901-62818923	11651	1	0.00486978
chr10-63465111-63466127	4309	0	0
chr10-63521111-63522270	4220	1	0.0126188
chr10-67884412-67885420	3623	1	0.0190919
chr10-68331299-68332816	4492	0	0
chr10-68406450-68407585	3479	0	0
chr10-68720948-68721841	3238	0	0
chr10-68827161-68828452	3393	0	0
chr10-688768-690282	5608	7	0.0767983
chr10-68900770-68901717	3032	1	0.0232833
chr10-69123908-69124597	3377	0	0
chr10-69318191-69319621	5761	0	0
chr10-69572171-69573636	4279	6	0.0829586
chr10-69801547-69803120	4385	0	0
chr10-70052563-70053937	4828	3	0.0371337
chr10-70145460-70146919	5853	0	0
chr10-70232659-70233711	3507	0	0
chr10-70255022-70255940	3301	11	0.21964
chr10-70381805-70382881	3538	2	0.0451736
chr10-70440310-70441612	3991	6	0.0891225
chr10-70477906-70479065	4453	0	0
chr10-71212319-71214138	5181	3	0.0333046
chr10-71396408-71398174	5621	1	0.00915147
chr10-71963954-71965012	4231	2	0.0287215
chr10-72007399-72008621	4719	56	0.823112
chr10-72087049-72088475	4651	1	0.0141992
chr10-72273410-72274940	4785	0	0
chr10-72354058-72355034	3071	0	0
chr10-73096101-73097227	4024	1	0.0134956
chr10-73732736-73733664	3696	45	0.765196
chr10-73772213-73773059	3751	0	0
chr10-73811125-73812051	3661	0	0
chr10-73997727-73998469	3107	1	0.022445
chr10-7407415-7413250	14320	24	0.110148
chr10-74824940-74827078	6231	2	0.0177855
chr10-75210235-75211244	4275	1	0.0245959
chr10-75234135-75236195	7429	1	0.0138814
chr10-75395371-75409842	37388	114	0.200231
chr10-77636338-77638737	7632	11	0.0972083
chr10-77925962-77927292	5303	1	0.0101202
chr10-79067008-79070458	9970	0	0
chr10-79242279-79243930	6261	1	0.00845833
chr10-79347327-79348191	3598	1	0.0152647
chr10-79444697-79446055	5037	0	0
chr10-79981473-79982537	3529	1	0.0197111
chr10-80453801-80455004	4524	1	0.0147952
chr10-8049412-8056366	17300	46	0.185727
chr10-81874294-81875973	4981	7	0.0963281
chr10-84194444-84195547	3374	7	0.155095
chr10-84328407-84329177	3716	0	0
chr10-86363168-86367607	13686	9	0.0465693
chr10-86399857-86401860	6830	1	0.0094894
chr10-86520879-86522332	5658	0	0
chr10-86711149-86712177	3888	0	0
chr10-86755670-86757460	6842	1	0.00768519
chr10-86942559-86943565	3774	39	0.675119
chr10-86970798-86971875	3423	0	0
chr10-87094001-87095741	6280	0	0
chr10-87504614-87505614	3392	1	0.0164837
chr10-89414649-89415409	3240	0	0
chr10-89535191-89536168	3745	3	0.0487059
chr10-89644481-89645291	3330	0	0
chr10-90857064-90858277	4934	1	0.0108489
chr10-91162522-91164132	6036	0	0
chr10-91409731-91410816	5057	1	0.0104653
chr10-91798214-91798942	3026	1	0.0183436
chr10-92239375-92240244	3205	6	0.123202
chr10-92290667-92291655	3698	1	0.0183541
chr10-92573491-92574710	4407	1	0.0121721
chr10-92688937-92690722	7144	1	0.00701899
chr10-92848281-92849282	4142	1	0.0129155
chr10-93060270-93063495	9016	34	0.269352
chr10-93073516-93075499	5527	6	0.0757993
chr10-931350-932980	4297	7	0.113252
chr10-93600633-93601630	3527	8	0.166351
chr10-93993591-93994444	3073	0	0
chr10-94402267-94403570	4509	1	0.0150576
chr10-95290429-95291367	3753	0	0
chr10-95560668-95561726	3658	0	0
chr10-95656104-95656969	4006	0	0
chr10-96043115-96044505	5126	1	0.0103785
chr10-96512451-96514182	5399	1	0.00983226
chr10-96586293-96587307	3971	1	0.0169182
chr10-96831951-96833516	6353	0	0
chr10-97185306-97186482	4083	1	0.0133014
chr10-97319055-97321291	6990	0	0
chr10-97333650-97335198	5919	0	0
chr10-97498184-97499763	6162	0	0
chr10-97640507-97641225	3029	0	0
chr10-97713328-97714907	5439	0	0
chr10-97771407-97772211	3004	1	0.0236376
chr10-98029858-98031391	5948	11	0.110522
chr10-987851-988675	3164	0	0
chr10-99329547-99330898	4621	11	0.157227
chr10-99534687-99537946	7714	9	0.0808378
chr10-99619952-99621688	6492	0	0
chr11-101127300-101129043	5785	5	0.0555146
chr11-101582627-101583953	4417	19	0.315457
chr11-102109902-102111599	6796	7	0.0664825
chr11-102451799-102453031	3633	1	0.0291086
chr11-10293733-10294386	3145	0	0
chr11-10305467-10308284	6548	6	0.058307
chr11-107017598-107019477	5542	2	0.0285829
chr11-10807815-10809574	5415	1	0.012352
chr11-108497772-108498680	3221	0	0
chr11-10857556-10858906	3348	0	0
chr11-110092515-110093951	5174	0	0
chr11-110295840-110297034	4668	0	0
chr11-110429851-110430610	3551	0	0
chr11-110711117-110713160	6433	1	0.0101558
chr11-111298580-111299703	4125	5	0.0790714
chr11-111540208-111541474	4070	2	0.0301729
chr11-111602000-111603215	5095	1	0.0105732
chr11-112024853-112025723	3078	0	0
chr11-112961803-112963768	6205	10	0.105641
chr11-113474347-113475606	4074	3	0.0483931
chr11-114058912-114061468	7503	0	0
chr11-115502857-115505163	6423	8	0.0743379
chr11-11620575-11622272	4806	0	0
chr11-117097823-117098796	3907	0	0
chr11-117143984-117144844	3167	0	0
chr11-117795920-117797426	4909	6	0.0823809
chr11-118152638-118153479	3206	1	0.0171428
chr11-118434708-118436990	6408	0	0
chr11-118530521-118531354	3606	0	0
chr11-118607593-118611181	9981	6	0.0498186
chr11-118790597-118792317	4859	0	0
chr11-119018169-119019405	3003	1	0.0350757
chr11-119056664-119057701	4571	0	0
chr11-119094308-119095754	5157	0	0
chr11-119107169-119108075	3340	1	0.0164947
chr11-119148934-119149971	3336	2	0.0330359
chr11-119205932-119206844	3367	0	0
chr11-119316238-119317436	3870	1	0.0139623
chr11-119339581-119340948	4703	13	0.183573
chr11-1194150-1195241	3297	28	0.623427
chr11-119727673-119729593	7022	1	0.00890409
chr11-12008191-12009294	3685	7	0.13564
chr11-120210780-120211637	3622	1	0.0150385
chr11-120335752-120336940	5609	0	0
chr11-120511169-120512226	3992	1	0.0135765
chr11-120564114-120565231	3875	8	0.13871
chr11-12110267-12111469	3759	10	0.162362
chr11-121292536-121293243	3179	0	0
chr11-122655571-122656771	3889	0	0
chr11-122976787-122977900	3106	2	0.0372183
chr11-123061466-123063095	4958	0	0
chr11-123194719-123196278	4784	1	0.0110625
chr11-123654026-123654977	3470	0	0
chr11-124758472-124759694	3237	12	0.270927
chr11-124762168-124763343	3724	0	0
chr11-124799482-124800623	4570	0	0
chr11-124865174-124866569	3683	6	0.118572
chr11-125165040-125166779	4939	2	0.0286311
chr11-125495242-125496423	3797	3	0.0482564
chr11-125887161-125888212	3758	5	0.103967
chr11-126062188-126063108	3332	0	0
chr11-12673868-12675434	5433	7	0.0793763
chr11-128521818-128522716	3702	0	0
chr11-128692777-128695170	7275	1	0.00691646
chr11-129278603-129280022	4712	3	0.0413857
chr11-129372635-129376500	10074	19	0.137893
chr11-130002228-130003528	4653	0	0
chr11-130069042-130071020	6918	1	0.00718138
chr11-13008784-13011037	7222	11	0.100928
chr11-130427507-130428622	4104	3	0.0421838
chr11-130448340-130450303	5508	4	0.0540509
chr11-1309161-1310268	4598	1	0.0116021
chr11-131910459-131911638	4060	5	0.0779234
chr11-13277250-13279046	6454	2	0.0178306
chr11-132943668-132944500	3238	7	0.143417
chr11-1336486-1337851	4545	16	0.248304
chr11-133832651-133833813	3488	14	0.276025
chr11-133919378-133921373	5233	48	0.628642
chr11-133955443-133957562	7601	4	0.0323676
chr11-134223671-134225597	6747	1	0.00951897
chr11-134275666-134277286	5159	4	0.0493002
chr11-134383567-134384257	3310	19	0.389624
chr11-134411487-134413025	4758	2	0.0251789
chr11-134762152-134763093	3085	11	0.24983
chr11-13668042-13669177	4878	1	0.0108538
chr11-1388890-1391116	8360	9	0.0704838
chr11-13962520-13964802	6556	9	0.0863226
chr11-14358263-14359306	3769	0	0
chr11-14643508-14644657	3943	0	0
chr11-14904926-14906224	3666	4	0.0707125
chr11-1546711-1547677	4169	1	0.012898
chr11-1556476-1557861	4427	25	0.344597
chr11-1571269-1573148	7112	3	0.0298365
chr11-16604507-16605677	3096	7	0.143536
chr11-16924846-16925851	3558	1	0.0153081
chr11-17013297-17014857	5461	7	0.0931081
chr11-17276233-17277147	3101	0	0
chr11-17475917-17477079	3878	0	0
chr11-1747750-1749482	5777	15	0.182977
chr11-1763576-1764323	3998	0	0
chr11-17719243-17722232	8391	21	0.190298
chr11-17734510-17736739	7731	20	0.18385
chr11-18012583-18013721	4020	0	0
chr11-18698535-18699274	3660	1	0.0150656
chr11-18791026-18792532	5789	5	0.0660927
chr11-19240927-19242850	6370	11	0.120823
chr11-19712391-19713791	4608	0	0
chr11-20156063-20157278	3622	8	0.135803
chr11-20387210-20388235	3966	0	0
chr11-20596652-20598374	4188	4	0.060173
chr11-20669034-20670299	4373	4	0.0550862
chr11-206976-209225	6675	0	0
chr11-2137722-2141254	11033	12	0.0705226
chr11-2166259-2167015	3082	10	0.24632
chr11-22192627-22193774	3053	8	0.185655
chr11-2268875-2271702	10582	13	0.0784145
chr11-235919-237290	3654	1	0.0187419
chr11-2376994-2378368	4509	0	0
chr11-2399811-2401244	4665	0	0
chr11-2414066-2415421	4593	39	0.604867
chr11-2444908-2445588	3026	1	0.0182435
chr11-2699181-2700857	5840	26	0.29787
chr11-27471695-27472810	3641	0	0
chr11-279073-281700	9178	25	0.18741
chr11-2869159-2870107	3437	22	0.445798
chr11-2883794-2885894	8767	3	0.0182266
chr11-2909060-2909863	3218	25	0.518806
chr11-2928559-2930526	6416	6	0.0541856
chr11-2991570-2992951	5273	0	0
chr11-30585209-30586581	4751	1	0.0140693
chr11-315740-316539	3689	24	0.427887
chr11-31798513-31799868	3653	9	0.168099
chr11-31804196-31806373	4959	6	0.0864691
chr11-31815871-31818265	7124	20	0.185882
chr11-32090849-32091731	4028	0	0
chr11-32433329-32435765	5983	15	0.180265
chr11-32892444-32893968	5030	0	0
chr11-33039154-33040300	4624	1	0.0114817
chr11-33257112-33258629	5835	0	0
chr11-33375947-33376948	4228	1	0.0126037
chr11-33700168-33700954	3167	7	0.184081
chr11-33868812-33869949	4158	1	0.0162172
chr11-34051440-34053156	5533	0	0
chr11-3422016-3423201	3365	0	0
chr11-34356683-34358176	5087	0	0
chr11-34915782-34916833	3376	1	0.0312843
chr11-35418875-35420335	5267	0	0
chr11-35618082-35619937	6948	1	0.00712196
chr11-36376404-36377848	4022	0	0
chr11-375664-377380	6895	53	0.524307
chr11-379296-380768	5746	55	0.67353
chr11-3797218-3798077	4074	0	0
chr11-3840626-3841766	3198	0	0
chr11-396686-398880	3285	35	0.685722
chr11-400097-403400	4007	33	0.588293
chr11-406492-407871	3724	13	0.266925
chr11-416420-417650	4644	4	0.0596971
chr11-420266-421747	3910	37	0.66102
chr11-43547372-43548304	3200	15	0.313567
chr11-43942077-43944498	7248	0	0
chr11-44308993-44310123	4350	4	0.0626473
chr11-44316148-44317233	3772	2	0.0465113
chr11-44565053-44565837	3012	0	0
chr11-44726968-44728211	4313	3	0.0504576
chr11-44949498-44951134	6177	1	0.00811119
chr11-449962-451178	4952	1	0.0135364
chr11-45146488-45147550	4371	0	0
chr11-45180233-45181177	3546	0	0
chr11-45649648-45650862	3954	31	0.51005
chr11-45664611-45665945	4987	3	0.0356336
chr11-45804065-45805426	4709	2	0.0300824
chr11-45847192-45847862	3113	0	0
chr11-45899837-45900616	3485	5	0.0986142
chr11-45921963-45923222	4107	3	0.0423246
chr11-46237714-46238497	3292	6	0.118134
chr11-46332542-46333640	4530	0	0
chr11-46347101-46348110	4345	2	0.0277209
chr11-46380319-46382523	5930	1	0.00894322
chr11-46389372-46393137	12756	12	0.0597635
chr11-46845644-46846526	3458	0	0
chr11-46917808-46918748	4219	1	0.0127645
chr11-47176477-47177334	3566	0	0
chr11-47185638-47187625	5822	3	0.0292492
chr11-47269523-47270619	3745	1	0.0144983
chr11-47408183-47408827	3357	0	0
chr11-47589587-47590875	6737	76	0.739075
chr11-47766649-47767470	3301	0	0
chr11-47980053-47981618	5783	0	0
chr11-484664-486082	3113	42	0.800633
chr11-48900174-48901190	3448	35	0.701995
chr11-49851566-49852600	3294	42	0.843829
chr11-506354-508009	7140	4	0.0304679
chr11-534692-537718	11550	1	0.00382399
chr11-554714-556560	7342	2	0.0186481
chr11-55872593-55873609	3145	31	0.66641
chr11-560383-561669	5209	2	0.0226828
chr11-567939-569184	5788	3	0.0305479
chr11-57459364-57461234	4712	0	0
chr11-57514199-57515832	5401	0	0
chr11-575465-577093	4651	0	0
chr11-57667733-57668674	4695	0	0
chr11-58578201-58579848	4628	0	0
chr11-59171574-59172835	3840	1	0.0140749
chr11-59668729-59669759	3057	1	0.0232277
chr11-60852452-60853638	3943	39	0.673273
chr11-61007565-61008835	3678	10	0.195897
chr11-61161089-61161790	3777	2	0.0327038
chr11-61294172-61295591	5040	3	0.043067
chr11-61332602-61333500	3484	0	0
chr11-61429450-61430225	3213	0	0
chr11-614761-616068	5098	18	0.253826
chr11-61508354-61509857	5617	4	0.0449442
chr11-61580337-61581566	4813	0	0
chr11-61752270-61752882	3071	3	0.0584314
chr11-61815102-61817256	7291	1	0.00881992
chr11-61827525-61829238	5326	0	0
chr11-61891098-61892120	3996	0	0
chr11-61917120-61917744	3072	2	0.0574662
chr11-61967143-61968460	5164	2	0.0231403
chr11-62337308-62338164	3153	3	0.085466
chr11-62545811-62546827	3782	3	0.0468256
chr11-62600983-62603019	8744	20	0.179358
chr11-62612167-62613084	3675	0	0
chr11-62664848-62665945	3696	0	0
chr11-626729-628037	3269	16	0.368817
chr11-62687602-62688396	3091	22	0.474908
chr11-62726523-62727655	5277	1	0.0125001
chr11-62786595-62787790	4685	1	0.0143371
chr11-62831208-62832592	4161	1	0.0164387
chr11-62925902-62927300	3778	11	0.191236
chr11-636436-640628	12611	46	0.251649
chr11-63670830-63671842	3618	0	0
chr11-63762417-63764418	8970	88	0.673759
chr11-63768181-63769963	6437	0	0
chr11-63813050-63814268	5514	0	0
chr11-63838643-63840002	4653	2	0.0345365
chr11-63985943-63986982	3449	1	0.0199629
chr11-63998587-64001194	8407	25	0.197096
chr11-64035471-64036893	5081	6	0.0752526
chr11-64116384-64117710	3016	29	0.690044
chr11-64165519-64166598	4113	1	0.0131605
chr11-64185206-64186756	5079	0	0
chr11-6418634-6419502	3526	0	0
chr11-64234154-64235240	4246	0	0
chr11-64240812-64242015	4559	0	0
chr11-64246301-64247869	5382	4	0.0471082
chr11-64269404-64270502	3608	0	0
chr11-64285136-64286180	3889	0	0
chr11-64291337-64292646	5712	7	0.083527
chr11-64299286-64301269	6282	2	0.0246506
chr11-64304761-64306442	5351	0	0
chr11-64317175-64318585	4187	0	0
chr11-64369402-64370715	4219	50	0.796924
chr11-64642406-64643512	3408	1	0.0199625
chr11-64712728-64714028	4134	4	0.0733229
chr11-64741962-64746354	11823	10	0.0566391
chr11-64777648-64779212	6396	0	0
chr11-64802777-64803429	3269	0	0
chr11-64809806-64810877	3175	2	0.0387391
chr11-64844256-64845162	3727	1	0.028573
chr11-64877958-64879094	4783	0	0
chr11-65013979-65014913	4177	1	0.0130387
chr11-65040859-65041833	4130	1	0.013035
chr11-65107663-65108771	3867	40	0.66884
chr11-65111575-65112941	4955	0	0
chr11-65116644-65117976	5256	4	0.0611788
chr11-65314467-65315862	5582	0	0
chr11-65354468-65355241	3164	0	0
chr11-65386256-65387135	3280	0	0
chr11-65538465-65541031	10145	51	0.338975
chr11-65569743-65571003	4752	0	0
chr11-65574150-65575030	3018	0	0
chr11-65584761-65585663	4362	50	0.781687
chr11-65591822-65592857	3963	41	0.688695
chr11-65615354-65616386	3133	0	0
chr11-65646308-65647732	6024	69	0.750526
chr11-65662698-65663608	3662	0	0
chr11-65780029-65781790	7563	5	0.0394313
chr11-65786279-65788102	7751	5	0.0379823
chr11-65857025-65861125	11365	4	0.0230796
chr11-65872365-65873903	5089	16	0.201648
chr11-65890404-65891499	3822	0	0
chr11-65899206-65900738	7038	1	0.00741513
chr11-65918817-65920083	5284	2	0.0223296
chr11-66042524-66043640	4899	58	0.744968
chr11-66051897-66052753	3189	0	0
chr11-66069784-66071178	5364	2	0.0260345
chr11-6611649-6612556	3394	1	0.0205015
chr11-66257440-66258782	5387	0	0
chr11-66267281-66269337	6189	1	0.00840893
chr11-66277741-66278735	3779	1	0.0180709
chr11-66288739-66289853	4381	0	0
chr11-66294361-66295621	5521	44	0.561305
chr11-6629675-6630848	5583	73	0.862581
chr11-66311622-66313449	4840	4	0.0475781
chr11-66347027-66348054	3505	0	0
chr11-66371336-66372258	3897	2	0.0293057
chr11-66466429-66467493	4122	0	0
chr11-66616101-66617576	5235	0	0
chr11-66727467-66728916	5328	3	0.0362839
chr11-66744333-66745267	3383	0	0
chr11-66842896-66843796	3525	0	0
chr11-66856150-66859143	9607	46	0.344506
chr11-66958033-66958902	3673	1	0.0148798
chr11-67117805-67119859	7556	0	0
chr11-67288461-67289778	5867	0	0
chr11-67303267-67304330	4073	24	0.38721
chr11-67317218-67318342	3878	0	0
chr11-67372417-67373675	4805	0	0
chr11-67391700-67392500	3101	0	0
chr11-67401146-67401982	3475	0	0
chr11-67420617-67421408	3445	0	0
chr11-67492943-67495244	6961	74	0.726582
chr11-67504189-67505471	4523	0	0
chr11-67507597-67508960	4988	0	0
chr11-67583458-67584482	3569	1	0.0150937
chr11-67629374-67630823	5890	0	0
chr11-67805016-67806380	3819	0	0
chr11-67990684-67991974	4481	32	0.498006
chr11-68002957-68004119	4005	1	0.0263371
chr11-68121048-68122301	5001	4	0.0556177
chr11-68212545-68214616	8040	0	0
chr11-68312338-68313463	4143	0	0
chr11-68683892-68685378	4900	10	0.13141
chr11-68750200-68751707	4390	18	0.298891
chr11-68840688-68841951	4638	0	0
chr11-694565-696375	7547	1	0.00682548
chr11-69636369-69643828	21083	16	0.0507363
chr11-69702164-69705161	8108	11	0.0978814
chr11-69774059-69775778	6824	7	0.0587751
chr11-69817266-69819942	9394	4	0.0227254
chr11-69985466-69986378	3074	2	0.0354627
chr11-70078233-70079091	3599	4	0.0761047
chr11-70270132-70271391	5417	0	0
chr11-70486162-70487308	3011	21	0.507285
chr11-7088902-7090145	5089	47	0.608018
chr11-71251128-71253115	6935	2	0.0200007
chr11-71447969-71448785	3478	1	0.0202519
chr11-71607175-71608442	3373	2	0.0339684
chr11-71786526-71788019	3317	0	0
chr11-72223204-72225277	6664	1	0.00768187
chr11-72243773-72244649	4070	2	0.0300428
chr11-7251527-7253004	5761	3	0.0364632
chr11-725597-726870	4046	4	0.0688635
chr11-72813961-72815053	3475	0	0
chr11-72821568-72822729	4358	8	0.120875
chr11-73141132-73143115	6544	0	0
chr11-73217973-73218840	3666	7	0.127497
chr11-73307408-73309518	7035	4	0.0344296
chr11-73376185-73377237	4377	1	0.0155902
chr11-73760231-73761438	3711	0	0
chr11-73982658-73983757	3930	0	0
chr11-74397850-74398892	3197	0	0
chr11-74493091-74493811	3101	0	0
chr11-746878-748032	5551	0	0
chr11-7513324-7514496	4059	0	0
chr11-75240603-75242446	7013	11	0.105756
chr11-75351181-75352251	4238	1	0.0162646
chr11-75429693-75430804	4269	13	0.203879
chr11-75525145-75526736	5431	5	0.060721
chr11-75667372-75668837	5532	2	0.025545
chr11-76206228-76211040	15167	6	0.0242435
chr11-76235295-76236539	3308	0	0
chr11-76380481-76381594	4193	0	0
chr11-76444364-76445783	3550	0	0
chr11-76670406-76671251	3316	0	0
chr11-7673481-7674454	3067	1	0.0343578
chr11-76783132-76784628	5689	4	0.0417086
chr11-77039649-77040731	4794	20	0.258591
chr11-77066523-77067406	3071	0	0
chr11-77473149-77474459	4783	2	0.0254039
chr11-77589316-77590346	3452	0	0
chr11-776804-777998	5132	0	0
chr11-77820141-77821216	4295	0	0
chr11-78196195-78197042	3252	42	0.728723
chr11-78416920-78418354	4985	0	0
chr11-79437315-79441160	9556	7	0.0431058
chr11-797641-798544	3553	0	0
chr11-8018863-8020011	4465	1	0.0119439
chr11-804828-805608	3623	0	0
chr11-8080812-8081680	3316	2	0.0531825
chr11-809203-810509	4804	0	0
chr11-818975-820271	5313	3	0.0304871
chr11-823557-824878	4154	60	0.916543
chr11-8262556-8263485	3983	3	0.0457225
chr11-8267986-8268775	3654	0	0
chr11-82732394-82733934	6536	8	0.0761046
chr11-829285-833558	12089	33	0.180441
chr11-842294-843396	4806	1	0.0109597
chr11-849088-850982	6888	27	0.264914
chr11-85663829-85665190	5093	0	0
chr11-86671654-86672544	3063	4	0.0797838
chr11-86800143-86800847	3263	1	0.0213061
chr11-86954860-86956247	3871	1	0.0177479
chr11-88508543-88509394	3204	7	0.161183
chr11-8963906-8964960	3534	0	0
chr11-9003549-9004768	5062	1	0.01055
chr11-9090915-9091815	3160	3	0.0538038
chr11-910243-911581	5726	0	0
chr11-92224470-92226866	6821	3	0.0325304
chr11-925184-926083	4468	18	0.272883
chr11-9264727-9265544	3569	0	0
chr11-94543729-94545747	7393	33	0.29928
chr11-9460563-9461605	3499	0	0
chr11-94768201-94769530	3926	1	0.0137874
chr11-95067080-95067918	3011	1	0.0234828
chr11-95089434-95090447	4392	0	0
chr11-95150484-95151647	3415	2	0.0424126
chr11-9572800-9574989	7416	0	0
chr11-95789297-95790879	5047	0	0
chr11-9613423-9614518	3098	0	0
chr11-9758218-9758923	3150	0	0
chr12-100716086-100717844	5088	15	0.205319
chr12-101697267-101698588	4274	0	0
chr12-101877100-101878023	4048	0	0
chr12-102957361-102958917	3949	0	0
chr12-103840496-103841549	3636	0	0
chr12-103929240-103931033	4469	0	0
chr12-104063989-104065309	3634	0	0
chr12-104137397-104138761	5043	4	0.06335
chr12-104215620-104216394	3216	3	0.0615521
chr12-104456476-104458617	6131	0	0
chr12-104957796-104958502	3332	1	0.0205531
chr12-105330495-105331274	3084	0	0
chr12-106138329-106139918	6346	4	0.0430733
chr12-106247103-106248596	5644	0	0
chr12-106302425-106303421	3093	0	0
chr12-106585652-106587308	4499	9	0.140885
chr12-106773985-106774969	3098	1	0.0180711
chr12-106955375-106956311	4476	2	0.0239028
chr12-107092835-107094033	4481	0	0
chr12-10722539-10723581	4205	2	0.0341515
chr12-107317827-107320330	6539	5	0.051758
chr12-107760618-107761360	3005	0	0
chr12-107843661-107844944	3517	4	0.078002
chr12-108730862-108732188	4739	1	0.0142453
chr12-108857190-108857940	3131	1	0.0175154
chr12-109097460-109098626	3819	0	0
chr12-109309022-109310573	5185	3	0.0333453
chr12-109713523-109714953	5272	1	0.00988964
chr12-110280588-110282257	6611	0	0
chr12-110468075-110469378	3941	1	0.0139741
chr12-110582307-110583336	4422	0	0
chr12-110742202-110743223	3305	0	0
chr12-111033258-111035742	7545	5	0.0369338
chr12-111319951-111320717	3671	29	0.523706
chr12-111405135-111406588	5948	0	0
chr12-111418093-111418946	3921	47	0.801457
chr12-111597809-111599754	7287	0	0
chr12-111841889-111842910	4172	1	0.0164283
chr12-112013102-112014052	3623	1	0.0149527
chr12-112381663-112382685	4386	1	0.0152391
chr12-112418654-112419439	3515	0	0
chr12-113056585-113057729	4160	1	0.012866
chr12-113077360-113078165	3080	5	0.107331
chr12-113184957-113186126	4197	0	0
chr12-113462946-113468637	14901	29	0.13592
chr12-113471083-113472876	5050	8	0.103487
chr12-114682970-114685073	4736	4	0.0493449
chr12-116276651-116278182	4689	0	0
chr12-116878585-116879900	3003	1	0.0183719
chr12-117360272-117361643	4500	7	0.110389
chr12-118103250-118104330	3163	2	0.0345112
chr12-118135926-118136926	3268	1	0.0322239
chr12-118371520-118373216	4291	0	0
chr12-118376210-118377034	3101	1	0.0227071
chr12-119593690-119595407	3923	3	0.0559465
chr12-119988744-119990262	5296	2	0.0221852
chr12-120116359-120117420	4870	0	0
chr12-120368244-120369556	5788	4	0.0431951
chr12-120468876-120470091	4936	0	0
chr12-120495847-120496910	3050	0	0
chr12-120640359-120641680	5047	0	0
chr12-120686309-120687676	4748	0	0
chr12-120903612-120904633	4731	0	0
chr12-121296243-121297366	4657	1	0.0114003
chr12-121399578-121400593	3884	0	0
chr12-121466540-121468153	6238	3	0.0335143
chr12-121537124-121538235	4419	0	0
chr12-121578266-121580682	5851	9	0.106724
chr12-121626272-121627236	4174	0	0
chr12-121792998-121794453	5209	0	0
chr12-121799917-121805484	14375	1	0.00343661
chr12-122021391-122023461	6936	0	0
chr12-122078288-122079301	4099	2	0.029619
chr12-122203254-122204559	5499	2	0.020374
chr12-122225508-122226824	5263	0	0
chr12-122421858-122422885	4854	0	0
chr12-12266746-12267607	3870	3	0.0458135
chr12-122835204-122836496	3621	0	0
chr12-122980274-122981425	5311	0	0
chr12-123150280-123151629	5050	0	0
chr12-123232821-123233841	3205	0	0
chr12-123270700-123272108	5452	0	0
chr12-123364071-123365372	5263	0	0
chr12-123383721-123384834	3402	0	0
chr12-123388651-123390050	4317	0	0
chr12-123533047-123534447	5490	4	0.0484868
chr12-123712100-123712960	3399	0	0
chr12-123761978-123762707	3159	2	0.0390687
chr12-123972027-123974181	8038	0	0
chr12-124294884-124295760	3767	6	0.0999735
chr12-124566251-124567848	5995	2	0.0183051
chr12-124863239-124864142	3541	1	0.0154104
chr12-124914013-124915353	4429	1	0.0122508
chr12-124993518-124994303	4042	0	0
chr12-125185572-125187566	6311	2	0.0173287
chr12-12561700-12562924	3963	0	0
chr12-126726233-126727105	3175	23	0.487116
chr12-12716831-12718314	4870	0	0
chr12-12723697-12726068	8778	0	0
chr12-127455397-127456362	3389	9	0.179816
chr12-128266497-128268606	7134	8	0.0789049
chr12-128823390-128824179	3153	0	0
chr12-128853326-128854326	4204	3	0.0429958
chr12-129903065-129904230	3821	10	0.177272
chr12-12999886-13001932	5511	16	0.191663
chr12-130160783-130164443	12009	19	0.114488
chr12-130337201-130339538	5845	48	0.554136
chr12-130871566-130872683	5453	1	0.0094122
chr12-131710490-131711909	4070	1	0.0170214
chr12-131827895-131831194	10317	9	0.0568077
chr12-131894398-131895507	3071	1	0.0176544
chr12-131908091-131910001	7231	80	0.728881
chr12-131928794-131930256	5168	1	0.0102645
chr12-131949606-131950696	5432	1	0.0191277
chr12-132084063-132085170	3581	1	0.0153324
chr12-132143322-132144924	6704	1	0.00975036
chr12-132189146-132190696	5002	11	0.165791
chr12-132328864-132329990	4086	12	0.209914
chr12-132406582-132407768	3464	21	0.415392
chr12-132489258-132491149	9033	8	0.0632218
chr12-132559807-132560894	4836	0	0
chr12-132569932-132571539	5907	64	0.759376
chr12-132582640-132583990	5274	55	0.706259
chr12-132618283-132619970	4723	16	0.250019
chr12-132686877-132689310	5687	12	0.136202
chr12-132710175-132711406	4588	1	0.0115777
chr12-132761396-132762403	4249	0	0
chr12-132828295-132829399	3685	0	0
chr12-132887093-132888272	4183	2	0.0343301
chr12-132908073-132909153	3373	1	0.0163919
chr12-133037180-133037939	3120	0	0
chr12-133080119-133081227	3402	0	0
chr12-133129943-133131008	4147	0	0
chr12-133235632-133236516	3318	26	0.529832
chr12-138290-139335	3202	21	0.436963
chr12-1529868-1531584	6796	1	0.00742699
chr12-15788785-15789806	3262	0	0
chr12-1593473-1595066	6208	0	0
chr12-1661536-1663347	3473	16	0.315243
chr12-1690709-1691573	3526	0	0
chr12-1796112-1797599	5285	1	0.012547
chr12-19129392-19130967	4849	3	0.0402771
chr12-19439250-19440751	4733	0	0
chr12-203426-204165	3018	10	0.241249
chr12-2052379-2054382	6242	4	0.044
chr12-22333902-22335043	3626	3	0.0463124
chr12-22543847-22544794	3139	1	0.0225881
chr12-24562023-24563360	3837	0	0
chr12-25250333-25251577	4732	0	0
chr12-25958259-25959390	4738	1	0.0111142
chr12-26124951-26126774	4380	0	0
chr12-26832550-26833588	3881	0	0
chr12-2690974-2691896	3077	0	0
chr12-27332751-27333743	3768	1	0.0142607
chr12-27779819-27780805	4039	0	0
chr12-2794224-2796023	7526	2	0.0152026
chr12-27970091-27970840	3239	2	0.0354441
chr12-2890500-2891472	3857	0	0
chr12-29149043-29150021	3133	0	0
chr12-2958795-2960278	6033	4	0.0404806
chr12-29783063-29784500	5505	7	0.0911754
chr12-3076846-3077802	3784	1	0.0178609
chr12-30795615-30796823	3599	0	0
chr12-31323784-31326448	8129	0	0
chr12-31589827-31591390	5880	0	0
chr12-31959228-31959899	3265	0	0
chr12-3199647-3201104	5188	4	0.0477333
chr12-32106316-32107217	4003	0	0
chr12-32399092-32400104	3900	0	0
chr12-32679197-32680044	3303	0	0
chr12-33438829-33440115	5091	9	0.114512
chr12-34107802-34108763	3336	20	0.388809
chr12-3490888-3493842	6987	5	0.0463008
chr12-39144582-39145698	3513	21	0.376698
chr12-39442410-39443697	4752	0	0
chr12-40105161-40106215	3709	2	0.0294009
chr12-42144324-42145086	3641	0	0
chr12-42237423-42238817	4392	0	0
chr12-42482853-42484391	4736	1	0.0142969
chr12-4269237-4275239	13931	0	0
chr12-43550917-43552482	4133	9	0.142009
chr12-44876048-44877052	3150	3	0.0555851
chr12-45050420-45051603	3622	8	0.163271
chr12-45215931-45216969	3548	1	0.0195487
chr12-45728689-45730672	6336	0	0
chr12-459537-461196	6803	1	0.00746388
chr12-45989779-45990973	3836	0	0
chr12-46267272-46269625	5935	1	0.0174391
chr12-46371352-46372986	6100	3	0.0318807
chr12-47819327-47820405	3554	0	0
chr12-48004107-48004948	3071	3	0.0818822
chr12-4809108-4810491	4206	4	0.0698667
chr12-48183579-48184791	3678	5	0.0840711
chr12-48814423-48815356	3239	0	0
chr12-48977908-48981767	11248	6	0.0330494
chr12-48996835-48998658	6007	3	0.0283523
chr12-49059855-49060979	4638	0	0
chr12-4909420-4911874	6137	11	0.119503
chr12-49130290-49131709	5110	0	0
chr12-49264464-49265392	3136	0	0
chr12-49295091-49297577	7421	7	0.0557005
chr12-49335946-49337379	5217	18	0.220379
chr12-49341937-49343092	3137	0	0
chr12-49345052-49347025	5493	0	0
chr12-49366439-49367653	4606	0	0
chr12-49537841-49539854	7392	2	0.0226916
chr12-49706660-49707804	4710	0	0
chr12-49961057-49962380	5386	19	0.236746
chr12-5043765-5045180	5017	18	0.244639
chr12-50763716-50765059	5098	0	0
chr12-51217109-51218113	3124	2	0.0354631
chr12-51269621-51270627	4348	0	0
chr12-51590691-51591500	3250	0	0
chr12-51814051-51814889	3962	2	0.0308962
chr12-51820396-51822354	7524	13	0.119509
chr12-51847062-51849567	6882	20	0.210081
chr12-52006684-52007912	4835	0	0
chr12-52036736-52037814	3711	1	0.0148099
chr12-52050770-52051637	3048	0	0
chr12-52079567-52080394	3638	38	0.694493
chr12-53046796-53047922	3233	0	0
chr12-53180242-53181366	4417	0	0
chr12-53219933-53221926	4816	1	0.013965
chr12-53324849-53325994	4197	0	0
chr12-53500667-53501529	3077	0	0
chr12-53675842-53677481	3764	2	0.0330212
chr12-53751105-53752098	3088	1	0.0178739
chr12-53973032-53975319	5250	12	0.147519
chr12-53984913-53986318	3301	9	0.155263
chr12-53999591-54000864	3865	8	0.1428
chr12-54033242-54034925	4519	6	0.0864159
chr12-5432045-5433807	4531	1	0.0151162
chr12-55728234-55729402	3926	0	0
chr12-56079009-56080609	4700	9	0.133036
chr12-56104085-56105263	3715	0	0
chr12-56257909-56258743	3024	1	0.0183917
chr12-56487618-56488918	3354	9	0.186468
chr12-56687507-56688661	4385	0	0
chr12-57087015-57089333	6511	0	0
chr12-57216194-57217385	5037	1	0.0103713
chr12-57238150-57240795	6982	1	0.00719696
chr12-57475293-57476399	3162	20	0.418263
chr12-57620926-57621914	3196	1	0.017518
chr12-57631879-57633273	5043	1	0.0102476
chr12-57726127-57727768	6467	78	0.824288
chr12-57737088-57738951	6205	58	0.638805
chr12-57755069-57755998	3197	0	0
chr12-57845480-57847263	6039	0	0
chr12-58919779-58920671	3461	1	0.0203626
chr12-6199987-6201226	3714	0	0
chr12-62190988-62192487	3571	2	0.040674
chr12-62602380-62603892	5638	0	0
chr12-62934364-62935355	3410	0	0
chr12-63149857-63151187	4076	3	0.0484848
chr12-63843624-63844621	3711	1	0.0186507
chr12-642587-643489	4093	1	0.0166678
chr12-64404155-64405164	3879	0	0
chr12-64610014-64611119	4569	1	0.0148035
chr12-64780451-64781389	3556	2	0.0322108
chr12-64824466-64825363	3355	1	0.0163175
chr12-65169416-65170616	4020	0	0
chr12-65278607-65279470	3061	0	0
chr12-6534096-6535441	5332	1	0.0123857
chr12-65741713-65742620	3234	4	0.0881446
chr12-65823738-65826401	7698	9	0.0692058
chr12-6606335-6607624	3718	1	0.0182704
chr12-6620083-6621144	3977	40	0.692959
chr12-6700049-6700912	3215	0	0
chr12-67068891-67069944	3095	2	0.046795
chr12-67269262-67270267	3351	0	0
chr12-67648387-67650096	6380	0	0
chr12-6766408-6767757	5298	1	0.0123501
chr12-6828406-6829475	3576	0	0
chr12-68610441-68611597	3959	0	0
chr12-6867229-6868229	3797	0	0
chr12-68807843-68808883	4090	0	0
chr12-69239493-69240315	4131	0	0
chr12-6927539-6928761	3961	1	0.0169371
chr12-69738561-69739779	4861	0	0
chr12-7018231-7019052	3627	0	0
chr12-70242838-70243969	3634	1	0.0189987
chr12-70365658-70367272	4564	1	0.0116505
chr12-71754698-71755560	3056	0	0
chr12-72271904-72273771	5827	10	0.110913
chr12-752277-754247	7186	0	0
chr12-76031064-76032536	4606	0	0
chr12-76083938-76085351	4689	0	0
chr12-76558928-76560050	3191	0	0
chr12-76763739-76764625	3100	0	0
chr12-79689752-79691374	6406	1	0.00792962
chr12-80936830-80937735	3146	1	0.033789
chr12-8242456-8244117	4234	2	0.0268205
chr12-8389960-8390738	3118	4	0.103715
chr12-8697457-8698807	4745	0	0
chr12-88579684-88580889	3096	0	0
chr12-89351392-89354367	8937	2	0.0122438
chr12-89525236-89526127	3411	0	0
chr12-89707660-89710288	9399	0	0
chr12-92144935-92146557	5464	2	0.0205618
chr12-92928567-92929722	4762	0	0
chr12-93441160-93442313	5504	0	0
chr12-93570188-93573619	11739	3	0.0148741
chr12-94147952-94150224	8282	0	0
chr12-94459561-94460531	3383	0	0
chr12-94649776-94650536	3769	0	0
chr12-94873057-94874009	4528	0	0
chr12-95072875-95073688	3493	0	0
chr12-95217059-95218221	3956	1	0.0138506
chr12-95548131-95549203	4592	8	0.123387
chr12-95790096-95791421	4145	3	0.0474857
chr12-96194062-96195367	3411	0	0
chr12-96399414-96400752	6351	0	0
chr12-98515275-98516483	4193	1	0.0165477
chr12-98593416-98594425	3509	0	0
chr12-98644495-98645705	4994	0	0
chr12-98894445-98895596	4046	7	0.107698
chr13-100088703-100089551	3041	0	0
chr13-100674076-100675469	5172	0	0
chr13-101415766-101416907	3521	21	0.392733
chr13-101916076-101917125	4197	13	0.205034
chr13-102596464-102597642	3807	0	0
chr13-102772949-102774537	4694	13	0.188746
chr13-102798528-102800866	7368	0	0
chr13-106534121-106536676	10101	6	0.0362195
chr13-107866945-107868715	4663	4	0.0613691
chr13-108495451-108496671	4520	1	0.0116276
chr13-109140146-109141351	4359	31	0.481027
chr13-109782267-109787833	22613	110	0.349809
chr13-110306545-110308243	6528	10	0.0931064
chr13-110561243-110562130	3514	0	0
chr13-110615434-110616431	4286	0	0
chr13-110705734-110706547	3075	0	0
chr13-110712372-110716183	12442	1	0.00434178
chr13-110914140-110916019	7360	4	0.0288387
chr13-111114502-111116259	5275	2	0.0225114
chr13-111153292-111154184	3570	1	0.0153186
chr13-112055571-112058351	7679	19	0.173011
chr13-112066251-112069268	10135	32	0.222089
chr13-112071968-112074105	6324	3	0.0270649
chr13-112104285-112106177	5780	14	0.176759
chr13-112587398-112588342	3574	1	0.0154053
chr13-112689540-112690874	5380	1	0.00969111
chr13-113096173-113097251	4223	23	0.4424
chr13-113107253-113111220	8319	40	0.353565
chr13-113208049-113210203	7580	1	0.0065542
chr13-113296782-113297675	4270	0	0
chr13-113363552-113365370	4397	20	0.326165
chr13-113490164-113491310	4858	0	0
chr13-113584625-113585603	3655	0	0
chr13-113862835-113864233	6274	3	0.0302916
chr13-113883296-113884467	3679	17	0.340977
chr13-114131924-114133041	4221	2	0.0376851
chr13-114281280-114282559	4658	0	0
chr13-114314190-114314890	3108	0	0
chr13-18232339-18237104	8689	88	0.714055
chr13-19782008-19783094	3845	1	0.0138289
chr13-19862637-19864949	7474	1	0.00835871
chr13-19957409-19959490	7466	1	0.00695793
chr13-20141999-20143233	3789	43	0.780581
chr13-20160739-20162018	5129	2	0.0236883
chr13-20192070-20193770	5710	3	0.0337149
chr13-20231878-20232728	3467	3	0.0574774
chr13-20525430-20526304	3146	0	0
chr13-20703095-20704277	4035	0	0
chr13-20721473-20722299	3234	7	0.148445
chr13-20987979-20989277	4656	50	0.745704
chr13-21060381-21061768	5967	3	0.040773
chr13-21176149-21177193	3874	0	0
chr13-21458724-21459591	3380	0	0
chr13-21669121-21671223	5393	1	0.00963619
chr13-21673665-21675616	5562	0	0
chr13-22926111-22927259	3334	34	0.706523
chr13-23374996-23375626	3656	0	0
chr13-23578761-23580001	5200	0	0
chr13-24745531-24748117	7725	9	0.0659936
chr13-24922451-24923161	3066	0	0
chr13-25017909-25018970	3505	0	0
chr13-25169861-25171989	6059	13	0.141209
chr13-25300857-25302062	3339	9	0.179872
chr13-25371856-25372815	3888	8	0.131828
chr13-26050588-26052127	5804	4	0.0423766
chr13-26253800-26254966	3624	0	0
chr13-26557432-26558540	4775	4	0.0676725
chr13-27170950-27172331	5650	1	0.011567
chr13-27450029-27451141	3607	0	0
chr13-27620047-27622112	6186	0	0
chr13-27792413-27794368	5996	11	0.118345
chr13-27919865-27921962	5434	9	0.0994553
chr13-27953619-27954859	4659	6	0.0890188
chr13-27960296-27961423	3138	1	0.0177323
chr13-27968085-27969407	4768	4	0.0503963
chr13-27977378-27978836	4684	3	0.0530542
chr13-28100091-28101033	4208	0	0
chr13-28138040-28139316	4063	0	0
chr13-28493652-28495840	7519	13	0.104191
chr13-28532187-28533117	3559	1	0.0152282
chr13-28819647-28820761	3528	1	0.0152029
chr13-29594765-29596109	5339	0	0
chr13-29850013-29850804	3351	0	0
chr13-30306763-30307802	3667	1	0.0190337
chr13-30906136-30906968	3386	9	0.185891
chr13-31160973-31162533	4104	1	0.0133461
chr13-31199783-31200897	4871	1	0.0106102
chr13-32586148-32587698	4882	0	0
chr13-33015791-33017290	5158	1	0.0101056
chr13-33349794-33350644	3008	3	0.066841
chr13-34942235-34943290	3076	1	0.0225833
chr13-36345601-36346867	3638	1	0.0148564
chr13-36431459-36432316	3404	2	0.0368816
chr13-36919706-36920615	3149	1	0.0223256
chr13-38687100-38688162	3406	6	0.115734
chr13-40664364-40667613	11759	1	0.00474948
chr13-40789300-40790183	3694	3	0.0537229
chr13-41060037-41061984	6108	0	0
chr13-41311116-41312060	3768	0	0
chr13-41456778-41458531	6800	10	0.0945061
chr13-41960745-41961325	3074	0	0
chr13-42040043-42041514	6364	0	0
chr13-42047610-42049424	4452	1	0.0151993
chr13-43785899-43787560	5109	4	0.045567
chr13-43879072-43880159	4098	2	0.027885
chr13-44373236-44374307	3457	10	0.190373
chr13-44575930-44578152	8212	2	0.0133579
chr13-45340483-45341521	4641	0	0
chr13-46552836-46554571	5584	0	0
chr13-48303324-48304365	4152	0	0
chr13-48318500-48319721	3017	19	0.45058
chr13-48532276-48533327	3834	0	0
chr13-48975687-48976906	4325	1	0.0123766
chr13-49220251-49221406	4940	20	0.267923
chr13-49791925-49793167	5268	0	0
chr13-49996240-49997507	3288	0	0
chr13-50081146-50082272	3386	1	0.0313504
chr13-50123849-50128150	12041	24	0.127244
chr13-50129550-50130889	3738	0	0
chr13-51221982-51222752	4047	0	0
chr13-51451556-51453810	7485	0	0
chr13-51583921-51585099	4334	0	0
chr13-51803686-51804437	3042	1	0.0177117
chr13-52011179-52012431	4241	2	0.028907
chr13-52450021-52450803	3634	1	0.0150235
chr13-52455060-52455993	3063	0	0
chr13-52738859-52739910	3698	5	0.0862689
chr13-52845763-52848737	12289	52	0.297119
chr13-53200130-53202210	7285	45	0.442023
chr13-57632393-57634796	6377	25	0.278516
chr13-60396270-60397911	4492	0	0
chr13-72727093-72728016	3587	1	0.0197299
chr13-73058723-73060232	5477	2	0.025952
chr13-74134649-74135681	4178	0	0
chr13-75480717-75482663	7041	2	0.0154794
chr13-75635405-75637077	5642	3	0.0382563
chr13-76885188-76886964	6595	6	0.0640073
chr13-77697654-77698771	3791	0	0
chr13-80339879-80341533	5200	0	0
chr13-87671315-87672716	3999	3	0.040679
chr13-91347288-91349187	7867	0	0
chr13-93226993-93228624	4021	8	0.133522
chr13-94710899-94713797	8225	6	0.057916
chr13-94967630-94968723	3650	0	0
chr13-95301007-95301957	4192	1	0.01269
chr13-95641353-95642349	3000	17	0.397005
chr13-95643890-95644805	3369	0	0
chr13-95676615-95677692	4001	1	0.0136344
chr13-96089885-96091908	6231	5	0.0569082
chr13-97432967-97434865	5461	0	0
chr13-97975806-97977136	5240	0	0
chr13-98142145-98143987	7087	2	0.0236963
chr13-98576091-98577575	5709	0	0
chr13-98752229-98752849	3207	14	0.319504
chr13-99086078-99087971	7385	1	0.00837458
chr13-99200133-99201298	4246	0	0
chr13-99895380-99896657	3784	14	0.257111
chr13-99955869-99957432	4412	5	0.0761038
chr13-99967988-99972053	12241	19	0.103585
chr13-99979499-99983272	12360	24	0.125613
chr13-99997069-99998134	3910	17	0.283165
chr14-100158983-100160124	4361	3	0.0521407
chr14-100213933-100214699	3409	0	0
chr14-100238026-100240730	9458	0	0
chr14-100292272-100293102	3511	43	0.79247
chr14-100305484-100307336	7353	2	0.0187142
chr14-100537731-100539344	6029	54	0.624922
chr14-100567527-100569042	5643	0	0
chr14-100586769-100587715	3508	3	0.0629417
chr14-100726037-100727400	4404	12	0.189637
chr14-101457239-101459658	9336	19	0.131998
chr14-101559653-101565230	16317	65	0.263801
chr14-101705667-101706368	3098	1	0.0175494
chr14-101760415-101762517	5655	0	0
chr14-101964300-101965561	5032	2	0.0237588
chr14-102086385-102087731	4990	0	0
chr14-102139261-102140640	4078	0	0
chr14-102362820-102363536	3394	1	0.0159863
chr14-102506981-102510329	11412	77	0.457762
chr14-102516614-102517609	4513	0	0
chr14-102544448-102545288	4011	4	0.0601573
chr14-102554995-102555653	3005	4	0.0902199
chr14-102591590-102593707	8837	1	0.00685865
chr14-102776905-102778368	5666	2	0.0185815
chr14-102922680-102923911	4380	3	0.0398698
chr14-102928061-102930733	11432	19	0.104302
chr14-103056732-103058094	5928	1	0.0111064
chr14-103102029-103105162	9907	43	0.290584
chr14-103123017-103123909	3322	2	0.0372355
chr14-103126898-103127586	3943	49	0.774018
chr14-103138203-103139085	3278	22	0.473976
chr14-103188905-103189770	4023	3	0.0544737
chr14-103207143-103208006	3260	15	0.282826
chr14-103220222-103221039	3630	8	0.145845
chr14-103273242-103274555	5298	19	0.254246
chr14-103278896-103279934	4345	11	0.200868
chr14-103333473-103335324	8008	0	0
chr14-103384881-103386371	4211	0	0
chr14-103520727-103523459	10904	16	0.093596
chr14-103561972-103563334	5639	0	0
chr14-103628215-103630135	6930	0	0
chr14-103715042-103716615	6849	1	0.00740778
chr14-103846825-103848653	8603	9	0.0664037
chr14-103928193-103928897	3052	31	0.686065
chr14-104116700-104118237	6535	14	0.146048
chr14-104135623-104139335	13907	8	0.03621
chr14-104176837-104177866	3502	22	0.442078
chr14-104604182-104605126	3126	3	0.0688968
chr14-104689184-104690236	3987	2	0.027193
chr14-104723591-104724527	3699	0	0
chr14-104752610-104753753	4202	0	0
chr14-104794998-104796102	4371	0	0
chr14-104800108-104801501	5759	1	0.0182065
chr14-104815495-104816638	4749	0	0
chr14-104864178-104866314	7243	8	0.0792889
chr14-104883841-104885102	3152	29	0.608803
chr14-104931740-104934153	6447	52	0.553242
chr14-104977731-104978888	4311	3	0.0419759
chr14-105020275-105021578	6409	1	0.0161917
chr14-105086897-105088546	5321	4	0.0533525
chr14-105167215-105169436	8526	8	0.0586367
chr14-105248155-105249988	5719	14	0.179403
chr14-105300222-105301659	6234	1	0.0167144
chr14-105314003-105315690	7297	0	0
chr14-105398144-105399128	4242	0	0
chr14-105474252-105475563	5647	2	0.0206064
chr14-105477814-105479363	4790	21	0.285551
chr14-105486267-105487959	5288	1	0.00994146
chr14-105489839-105491860	8411	2	0.0128901
chr14-105526163-105530077	13155	15	0.0725626
chr14-21024577-21026111	4605	4	0.0499933
chr14-21090389-21093284	8519	83	0.671967
chr14-22836685-22837804	3631	9	0.170752
chr14-22980678-22982965	8097	8	0.0679665
chr14-23057273-23058151	3110	0	0
chr14-23301304-23302693	5723	0	0
chr14-23321004-23322112	3327	0	0
chr14-23351879-23352897	3618	3	0.0508618
chr14-23365227-23366738	5324	9	0.105319
chr14-23550794-23551933	3259	1	0.0171366
chr14-23575678-23577718	7253	39	0.378144
[truncated: 5,806 more rows]

## Sheet: Tar_K562_RIMSseq_Rep1
region	total	error	Methylation
chr1-100037927-100038848	3563	0	0
chr1-100132575-100133198	4185	1	0.021611
chr1-100213211-100213542	9258	94	0.872229
chr1-100539013-100540329	26543	51	0.169632
chr1-1013950-1014471	12248	59	0.439499
chr1-1019389-1020963	7898	1	0.00866839
chr1-10326126-10326332	4130	45	0.819431
chr1-10398492-10399940	10994	2	0.0127421
chr1-1040117-1044925	69801	549	0.720464
chr1-10430144-10431015	6710	0	0
chr1-1045689-1046020	8665	87	0.903619
chr1-1046773-1047131	4738	44	0.774372
chr1-10472121-10472743	6776	1	0.010931
chr1-10474862-10475115	3588	1	0.0215884
chr1-1047795-1048232	12186	109	0.830299
chr1-1048827-1049049	4518	53	0.966578
chr1-1054895-1055314	4606	31	0.613304
chr1-106080772-106081232	6520	6	0.0812592
chr1-10638243-10640041	38827	405	0.91677
chr1-10647754-10648083	8099	5	0.0500752
chr1-10653782-10654146	8885	4	0.0355512
chr1-10654345-10654651	4255	8	0.170402
chr1-10659811-10660524	15512	37	0.220491
chr1-10665131-10665560	13005	5	0.0304612
chr1-1067284-1069938	4926	36	0.66382
chr1-10693717-10695464	11223	0	0
chr1-107056584-107057788	25719	4	0.0101711
chr1-1071837-1072253	14036	91	0.594294
chr1-107480611-107480820	5827	2	0.0266912
chr1-107964630-107965419	5676	24	0.383398
chr1-108199779-108200579	13216	1	0.00573722
chr1-1082720-1083010	4951	45	0.821616
chr1-1084439-1084646	4185	50	0.877097
chr1-108559917-108560590	5833	0	0
chr1-108660972-108661756	4202	43	0.921411
chr1-108746397-108747200	4651	0	0
chr1-108963060-108963592	6758	1	0.0124979
chr1-109090567-109091010	4965	1	0.0156737
chr1-109213843-109214476	4786	0	0
chr1-109249324-109250101	5415	1	0.0147656
chr1-109258433-109259078	26015	272	0.920014
chr1-109281692-109281904	6001	59	0.893182
chr1-109397453-109398272	19474	0	0
chr1-109426027-109426948	6094	1	0.0141915
chr1-109466341-109467165	11457	6	0.040831
chr1-109483832-109484281	5780	0	0
chr1-109493924-109494321	14088	2	0.0114187
chr1-109548418-109548968	5243	1	0.0166382
chr1-109655920-109656505	5731	1	0.014941
chr1-109667960-109668334	5574	9	0.141293
chr1-109739730-109740684	13399	89	0.601105
chr1-109910522-109911267	4296	16	0.350828
chr1-109984627-109985404	5926	4	0.0594585
chr1-110067644-110070681	14677	113	0.703712
chr1-110209635-110212172	35786	302	0.769465
chr1-110223044-110223390	11419	44	0.334814
chr1-110338321-110340178	23702	3	0.00755787
chr1-110407271-110407918	10625	1	0.00759123
chr1-11058974-11060577	12071	2	0.0120469
chr1-110673623-110675675	46776	304	0.585927
chr1-11099331-11100079	7386	2	0.0207333
chr1-111203692-111204681	6715	53	0.708927
chr1-111346517-111346917	4318	17	0.357619
chr1-111448683-111449580	11043	3	0.0197168
chr1-111619583-111620215	21970	4	0.0120583
chr1-111738431-111740655	6977	0	0
chr1-111755420-111756370	13620	0	0
chr1-111981847-111982763	25672	14	0.0438508
chr1-111988938-111991151	12979	26	0.178247
chr1-112508192-112509679	11336	93	0.760011
chr1-112618970-112619949	11432	0	0
chr1-112674854-112675475	4804	0	0
chr1-112714264-112715438	11862	1	0.00487888
chr1-112722952-112723165	5042	15	0.267979
chr1-113072970-113073638	6056	0	0
chr1-113198852-113199123	5704	51	0.775713
chr1-113389959-113391448	15051	1	0.00535282
chr1-113811752-113812678	23962	4	0.00998416
chr1-113929344-113930277	7718	0	0
chr1-114152515-114154050	5743	13	0.209704
chr1-114510440-114511643	21905	2	0.00362754
[truncated: 12,303 more rows]

## Sheet: Tar_K562_RIMSseq_Rep2
region	total	error	Methylation
[truncated: 13,274 more rows]

[truncated: 4 more sheets: Tar_K562_RIMSseq_Rep3, Tar_Tissue_RIMSseq_Rep1, Tar_Tissue_RIMSseq_Rep2, Tar_Tissue_RIMSseq_Rep3]
